# Supplementary material for: High-performance anionic stereogenic-at-cobalt(iii) complex/halide salts/oxone catalytic system for enantioselective halocyclization of olefins
Source: Royal Society of Chemistry journal article supplement (doi:10.1039/d4cc06610c), 2025-01-01
Supplement: d4cc06610c1.pdf [file d4cc06610c1.pdf]

## *Supporting Information for*

# **High-performance Anionic Stereogenic-at-cobalt(III) Complex/Halide Salts/Oxone Catalytic System for Enantioselective Halocyclization of Olefins**

Yi-Jun Fang, Xiao-Bao Wu, Qi-Ming Wang, Zu-Kui Xie, Chuan-Zhi Yao, Hua-Jie Jiang\*, and Jie Yu\*

*Department of Applied Chemistry, Anhui Province Engineering Laboratory for Green Pesticide Development and Application, and Anhui Province Key Laboratory of Crop Integrated Pest Management, Anhui Agricultural University, Hefei 230036, China*

E-mail: jieyu@ustc.edu.cn

### **Table of Contents**

|                                                                                               |      |
|-----------------------------------------------------------------------------------------------|------|
| 1. Introduction .....                                                                         | S-2  |
| 1.1. General Data .....                                                                       | S-2  |
| 1.2. Materials .....                                                                          | S-2  |
| 2. General Procedure for Preparation of Alkenes <b>2</b> .....                                | S-3  |
| 2.1 General Procedure for Preparation of Substrates <b>2a-2f, 2k, 2q</b> .....                | S-3  |
| 2.2 General Procedure for Preparation of Substrates <b>2n-2p</b> .....                        | S-5  |
| 2.3 General Procedure for Preparation of Substrates <b>2g-2j, 2l</b> .....                    | S-6  |
| 3. Detailed Optimization of the Reaction Conditions for Asymmetric Halocyclization.....       | S-9  |
| 4. General Procedure for the Enantioselective Halocyclizations and Characterization Data..... | S-12 |
| 5. The Derivations of ( <i>S</i> )-2-(Bromomethyl)-1-tosylpyrrolidine .....                   | S-28 |
| 6. General Procedure for Nonlinear Effect Studies .....                                       | S-30 |
| 7. X-Ray Diffraction Data .....                                                               | S-32 |
| 8. References .....                                                                           | S-40 |
| 9. Selected NMR and HPLC .....                                                                | S-41 |
| 9.1. NMR of the Substrates <b>2a-2o, 2q</b> .....                                             | S-41 |
| 9.2. NMR and HPLC of the Products <b>3-6</b> .....                                            | S-56 |

# 1. Introduction

## 1.1. General Data

<sup>1</sup>H-NMR, <sup>13</sup>C-NMR and <sup>19</sup>F-NMR spectrums were recorded on an Agilent 600 NMR spectrometer at 600 MHz, 151 MHz and 564 MHz using CDCl<sub>3</sub> as solvent, respectively. <sup>1</sup>H-NMR data are reported as follows:  $\delta$ , chemical shift; coupling constants ( $J$  are given in Hertz, Hz) and integration. Abbreviations to denote the multiplicity of a particular signal were s (singlet), d (doublet), t (triplet), q (quartet) and m (multiplet). Chemical shifts were reported in ppm from the tetramethylsilane with the solvent resonance as internal standard. Melting points were measured on a digital melting point apparatus and the temperature was uncorrected. High resolution mass spectrometric measurements (HRMS) were performed by the Waters Xevo G2-XS TOF (ESI Source). HPLC analysis was performed on Waters-Breeze (2487 Dual  $\lambda$  Absorbance Detector and 1525 Binary HPLC Pump, UV detection monitored at 254 nm). Chiralpak IA, IC, ID and IE columns were purchased from Daicel Chemical Industries, Ltd. Single crystal structures of the compounds were determined by measuring X-ray intensity data on a 'Bruker APEX-II CCD' diffractometer. The crystal was kept at low and room temperature (172-203 K) during data collection. Using Olex2, the structure was solved with the ShelXT structure solution program using Intrinsic Phasing and refined with the ShelXL refinement package using Least Squares minimization. The non-hydrogen atoms were refined anisotropically and all the hydrogen atoms were assigned in idealized locations. Optical rotations were recorded on an Anton Paar MCP-100 polarimeter.

## 1.2. Materials

Analytic grade solvents for the column chromatography and commercially available reagents were used as received. *n*-hexane, was dried over CaH<sub>2</sub> and distilled prior to use. Toluene was dried over Na and distilled prior to use. The catalysts ( $\Lambda$ -**1a** to  $\Lambda$ -**1e**)<sup>[1]</sup> were known compounds and synthesized according to the literatures. Alkenes **2m**<sup>[2]</sup>, **2p**<sup>[1b]</sup>  $\beta,\gamma$ -unsaturated hydrazones **2r-2v**<sup>[3]</sup>, tryptophols and tryptamine **2w-2z**<sup>[1d]</sup> were known compounds and prepared according to following procedure, and the spectral data were in accordance with the literatures. Alkenes **2a-2l**, **2n-2o** and **2q** were new compounds and synthesized according to the procedure reported.<sup>[1b]</sup>

## 2. General Procedure for Preparation of Alkenes 2

### 2.1 General Procedure for Preparation of Substrates 2a-2f, 2k, 2q

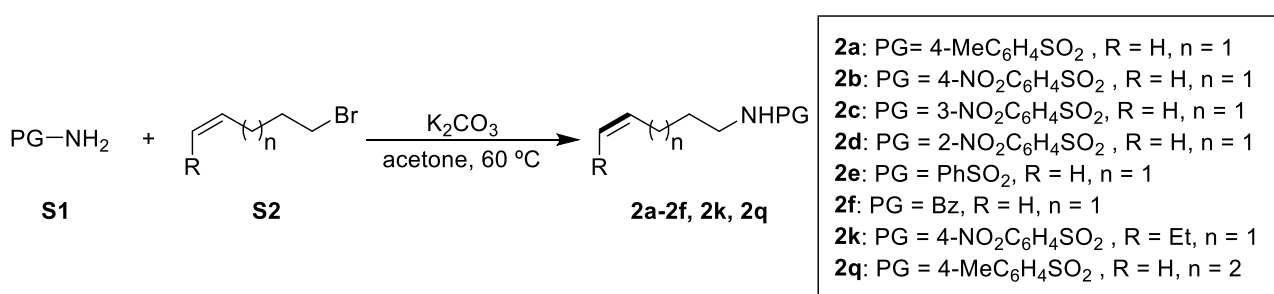

To an oven-dried round bottom flask with magnetic stir bar was added alkyl bromide **S2** (1.1 equiv), amide **S1** (1.0 equiv), K<sub>2</sub>CO<sub>3</sub> (2.0 equiv) and acetone (1.0 M). The solution was heated at 60 °C. Upon completion of the reaction (16 h), the solution was cooled to room temperature, filtered through a plug of Celite™ and rinsed with EtOAc, and solvent was removed in vacuo to afford a crude product. Purification of the resulting crude residue via silica gel flash column chromatography (gradient eluent: EtOAc in hexane) afforded the substrate **2a-2f, 2k, 2q**.

**4-Methyl-N-(pent-4-en-1-yl)benzenesulfonamide 2a:** yield: 2.347 g (76%); (Flash column chromatography eluent, petrol ether/EtOAc = 5/1); colorless oil; <sup>1</sup>H NMR (600 MHz, CDCl<sub>3</sub>) δ 7.75 (d, *J* = 8.1 Hz, 2H), 7.31 (d, *J* = 7.8 Hz, 2H), 5.74 – 5.67 (m, 1H), 4.98 – 4.94 (m, 2H), 4.60 – 4.58 (m, 1H), 2.97 – 2.93 (m, 2H), 2.43 (s, 3H), 2.06 – 2.03 (m, 2H), 1.59 – 1.53 (m, 2H); <sup>13</sup>C NMR (151 MHz, CDCl<sub>3</sub>) δ 143.4, 137.3, 137.2, 129.8, 127.2, 115.6, 42.7, 30.7, 28.8, 21.6; HRMS (ESI) calculated for C<sub>12</sub>H<sub>17</sub>NO<sub>2</sub>S [M+H]<sup>+</sup>: 240.1058, found: 240.1065.

**4-Nitro-N-(pent-4-en-1-yl)benzenesulfonamide 2b:** yield: 2.485 g (75%); (Flash column chromatography eluent, petrol ether/EtOAc = 5/1); light yellow solid; m.p.: 107.7 – 109.2 °C; <sup>1</sup>H NMR (600 MHz, CDCl<sub>3</sub>) δ 8.37 (d, *J* = 8.9 Hz, 2H), 8.06 (d, *J* = 8.9 Hz, 2H), 5.78 – 5.66 (m, 1H), 5.05 – 4.94 (m, 2H), 4.69 (s, 1H), 3.04 (dd, *J* = 13.4, 6.8 Hz, 2H), 2.07 (q, *J* = 7.0 Hz, 2H), 1.60 (dd, *J* = 13.8, 6.6 Hz, 3H); <sup>13</sup>C NMR (151 MHz, CDCl<sub>3</sub>) δ 150.2, 146.2, 136.9, 128.4, 124.5, 116.1, 42.9, 30.6, 28.9; HRMS (ESI) calculated for C<sub>11</sub>H<sub>14</sub>N<sub>2</sub>O<sub>4</sub>S [M+H]<sup>+</sup>: 271.0753, found: 271.0754.

**3-Nitro-N-(pent-4-en-1-yl)benzenesulfonamide 2c:** yield: 2.105 g (75%); (Flash column chromatography eluent, petrol ether/EtOAc = 5/1); light yellow solid; m.p.: 100.5 – 101.7 °C; <sup>1</sup>H NMR (600 MHz, CDCl<sub>3</sub>) δ 8.71 (s, 1H), 8.44 (d, *J* = 7.5 Hz, 1H), 8.21 (d, *J* = 7.0 Hz, 1H), 7.76 (t, *J* = 7.9 Hz, 1H), 5.78 – 5.65 (m, 1H), 5.05 – 4.92 (m, 2H), 4.81 (s, 1H), 3.09 – 3.00 (m, 2H), 2.07 (d, *J*

= 6.6 Hz, 2H), 1.64 – 1.56 (m, 2H);  $^{13}\text{C}$  NMR (151 MHz,  $\text{CDCl}_3$ )  $\delta$  148.5, 142.7, 137.0, 132.6, 130.1, 127.2, 122.3, 116.0, 42.9, 30.6, 28.9; **HRMS (ESI)** calculated for  $\text{C}_{11}\text{H}_{14}\text{N}_2\text{O}_4\text{S}$   $[\text{M}+\text{H}]^+$ : 271.0753, found: 271.0751.

**2-Nitro-*N*-(pent-4-en-1-yl)benzenesulfonamide 2d**: yield: 2.360 g (78%); (Flash column chromatography eluent, petrol ether/EtOAc = 5/1); light yellow solid; m.p.: 100.5 – 101.7 °C;  $^1\text{H}$  NMR (600 MHz,  $\text{CDCl}_3$ )  $\delta$  8.18 – 8.09 (m, 1H), 7.87 (dd,  $J$  = 6.7, 2.1 Hz, 1H), 7.80 – 7.70 (m, 2H), 5.78 – 5.66 (m, 1H), 5.28 (s, 1H), 5.00 – 4.96 (m, 2H), 3.12 (q,  $J$  = 6.8 Hz, 2H), 2.09 (q,  $J$  = 7.0 Hz, 2H), 1.69 – 1.61 (m, 2H);  $^{13}\text{C}$  NMR (151 MHz,  $\text{CDCl}_3$ )  $\delta$  148.2, 37.0, 134.0, 133.6, 132.8, 131.2, 125.4, 115.9, 43.3, 30.6, 28.8; **HRMS (ESI)** calculated for  $\text{C}_{11}\text{H}_{14}\text{N}_2\text{O}_4\text{S}$   $[\text{M}+\text{H}]^+$ : 271.0753, found: 271.0753.

***N*-(pent-4-en-1-yl)benzenesulfonamide 2e**: yield: 2.601 g (74%); (Flash column chromatography eluent, petrol ether/EtOAc = 5/1); colorless oil;  $^1\text{H}$  NMR (600 MHz,  $\text{CDCl}_3$ )  $\delta$  7.87 (d,  $J$  = 7.4 Hz, 2H), 7.58 (t,  $J$  = 6.8 Hz, 1H), 7.53 – 7.51 (m, 2H), 5.77 – 5.64 (m, 1H), 5.01 – 4.91 (m, 2H), 4.45 (s, 1H), 3.04 – 2.93 (m, 2H), 2.05 – 2.04 (m, 2H), 1.59 – 1.55 (m, 2H);  $^{13}\text{C}$  NMR (151 MHz,  $\text{CDCl}_3$ )  $\delta$  140.3, 137.2, 132.7, 129.2, 127.1, 115.7, 42.8, 30.7, 28.9; **HRMS (ESI)** calculated for  $\text{C}_{11}\text{H}_{15}\text{NO}_2\text{S}$   $[\text{M}+\text{H}]^+$ : 226.0902, found: 226.0910.

***N*-(pent-4-en-1-yl)benzamide 2f**: yield: 2.150 g (75%); (Flash column chromatography eluent, petrol ether/EtOAc = 5/1); colorless oil;  $^1\text{H}$  NMR (600 MHz,  $\text{CDCl}_3$ )  $\delta$  7.81 – 7.70 (m, 2H), 7.51 – 7.45 (m, 1H), 7.44 – 7.33 (m, 2H), 6.24 (s, 1H), 5.86 – 5.82 (m, 1H), 5.06 (dd,  $J$  = 17.1, 1.6 Hz, 1H), 5.00 (dd,  $J$  = 10.2, 1.6 Hz, 1H), 3.46 (q,  $J$  = 7.0 Hz, 2H), 2.21 – 2.12 (m, 2H), 1.78 – 1.67 (m, 2H);  $^{13}\text{C}$  NMR (151 MHz,  $\text{CDCl}_3$ )  $\delta$  167.6, 137.9, 134.9, 131.4, 128.6, 126.9, 115.4, 39.7, 31.3, 28.9; **HRMS (ESI)** calculated for  $\text{C}_{12}\text{H}_{16}\text{NO}$   $[\text{M}+\text{H}]^+$ : 190.1232, found: 190.1235.

**(*Z*)-*N*-(hept-4-en-1-yl)-4-nitrobenzenesulfonamide 2k**: yield: 2.140 g (83%); (Flash column chromatography eluent, petrol ether/EtOAc = 10/1); white solid; m.p.: 105.2 – 106.5 °C;  $^1\text{H}$  NMR (600 MHz,  $\text{CDCl}_3$ )  $\delta$  8.37 (d,  $J$  = 8.5 Hz, 2H), 8.05 (d,  $J$  = 8.6 Hz, 2H), 5.42 – 5.38 (m, 1H), 5.24 – 5.19 (m, 1H), 4.65 (s, 1H), 3.03 (q,  $J$  = 6.4 Hz, 2H), 2.04 (q,  $J$  = 7.2 Hz, 2H), 2.00 – 1.92 (m, 2H), 1.60 – 1.51 (m, 2H), 0.93 (t,  $J$  = 7.5 Hz, 3H);  $^{13}\text{C}$  NMR (151 MHz,  $\text{CDCl}_3$ )  $\delta$  150.2, 146.2, 133.4, 128.4, 127.0, 124.5, 43.2, 29.7, 24.2, 20.6, 14.3; **HRMS (ESI)** calculated for  $\text{C}_{13}\text{H}_{18}\text{N}_2\text{O}_4\text{S}$   $[\text{M}+\text{H}]^+$ : 299.1066, found: 299.1072.

***N*-(hex-5-en-1-yl)-4-methylbenzenesulfonamide 2q**: yield: 2.160 g (67%); (Flash column chromatography eluent, petrol ether/EtOAc = 10/1); colorless oil;  $^1\text{H NMR}$  (600 MHz,  $\text{CDCl}_3$ )  $\delta$  7.75 (d,  $J = 7.9$  Hz, 2H), 7.30 (d,  $J = 7.5$  Hz, 2H), 5.77 – 5.65 (m, 1H), 4.96 – 4.91 (m, 2H), 4.52 (s, 1H), 2.99 – 2.89 (m, 2H), 2.43 (s, 3H), 1.99 (d,  $J = 6.7$  Hz, 2H), 1.52 – 1.42 (m, 2H), 1.38 – 1.35 (m, 2H);  $^{13}\text{C NMR}$  (151 MHz,  $\text{CDCl}_3$ )  $\delta$  143.4, 138.2, 137.2, 129.8, 127.2, 115.0, 43.2, 33.1, 29.1, 25.8, 21.6; **HRMS (ESI)** calculated for  $\text{C}_{16}\text{H}_{23}\text{NO}_3\text{S}$   $[\text{M}+\text{H}]^+$ : 254.1215, found: 254.1218.

## 2.2 General Procedure for Preparation of Substrates 2n-2o

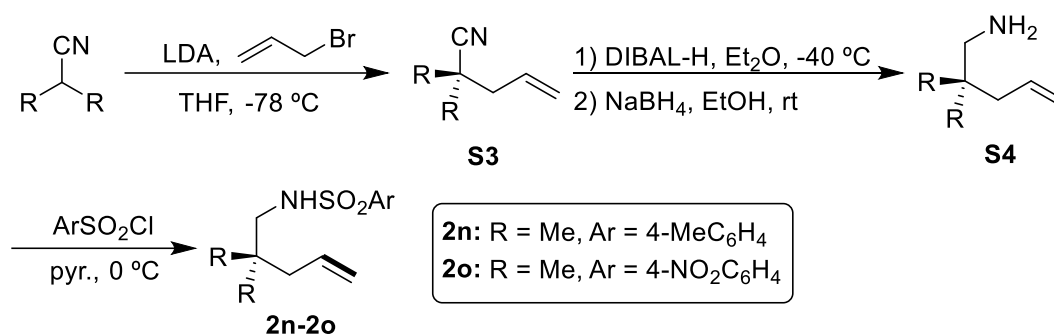

*n*-Butyllithium (2.4 M in hexane, 12 mmol, 1.2 equiv.) was added to the diisopropylamine (12 mmol, 1.2 equiv.) at 0 °C in THF (15 mL). The solution was stirred at 0 °C for 30 min, and then cooled to -78 °C. The solution of disubstituted acetonitrile (10 mmol, 1.0 equiv.) in THF (5 mL) was added to the reaction mixture slowly. The solution was stirred at -78 °C for another 2 h, to which the allyl bromide (12.5 mmol, 1.2 equiv.) was added. The reaction mixture was stirred overnight. The reaction was quenched with addition of saturated aqueous  $\text{NH}_4\text{Cl}$ , extracted with  $\text{Et}_2\text{O}$  and the organic layers were dried over  $\text{Na}_2\text{SO}_4$ , and concentrated. The resultant oil was used without purification in the subsequent step. The DIBAL-H (1.5 M in toluene, 15 mmol, 1.5 equiv.) was added to the alkylated nitrile **S3** in  $\text{Et}_2\text{O}$  (20 mL) at -40 °C. The reaction mixture was stirred for 3 h and then  $\text{NaBH}_4$  (30 mmol, 3.0 equiv.) was added. After 10 min, the  $\text{EtOH}$  (20 mL) was added to the solution carefully. The reaction mixture was allowed to warm to room temperature and stirred overnight then diluted with  $\text{Et}_2\text{O}$  (20 mL), extracted with 1 M  $\text{HCl}$ . The combined acidic extracts were made basic (pH > 13) with 15%  $\text{NaOH}$  (aq.) and extracted with  $\text{CH}_2\text{Cl}_2$ . The combined organic extracts were dried over  $\text{Na}_2\text{SO}_4$  and concentrated. The resultant oil was used without purification in the subsequent step. The amine **S4** (5.0 mmol, 1.0 equiv.) was dissolved in pyridine (10 mL) and cooled to 0 °C. Following addition of the sulfonyl chloride (5.5 mmol, 1.1 equiv.), the reaction mixture was stirred at room temperature for 4 h. The solution was diluted with  $\text{Et}_2\text{O}$  (20 mL), then washed with 1 M  $\text{HCl}$ , dried

over Na<sub>2</sub>SO<sub>4</sub> and purified by column chromatography, EtOAc/Hexanes (5%→20% EtOAc) to afford the sulfonyl-protected  $\gamma$ -amino-alkene **2n-2o**.

**N-(2,2-dimethylpent-4-en-1-yl)-4-methylbenzenesulfonamide 2n**: yield: 3.317 g (80%); (Flash column chromatography eluent, petrol ether/EtOAc = 7/1); white solid; m.p.: 107.4 – 109.7 °C; <sup>1</sup>H NMR (600 MHz, CDCl<sub>3</sub>)  $\delta$  7.73 (d, *J* = 8.2 Hz, 2H), 7.31 (d, *J* = 8.0 Hz, 2H), 5.72 (m, 1H), 5.01 (t, *J* = 13.7 Hz, 2H), 4.52 (s, 1H), 2.68 (d, *J* = 6.9 Hz, 2H), 2.43 (s, 3H), 1.96 (d, *J* = 7.4 Hz, 2H), 0.86 (s, 6H); <sup>13</sup>C NMR (151 MHz, CDCl<sub>3</sub>)  $\delta$  143.4, 137.2, 134.4, 129.8, 127.2, 118.0, 53.0, 44.2, 34.2, 25.0, 21.6; HRMS (ESI) calculated for C<sub>14</sub>H<sub>21</sub>NO<sub>2</sub>S [M+H]<sup>+</sup>: 268.1371, found: 268.1371.

**N-(2,2-dimethylpent-4-en-1-yl)-4-nitrobenzenesulfonamide 2o**: yield: 2.150 g (80%); (Flash column chromatography eluent, petrol ether/EtOAc = 5/1); white solid; m.p.: 105.2 – 106.5 °C; <sup>1</sup>H NMR (600 MHz, CDCl<sub>3</sub>)  $\delta$  8.37 (d, *J* = 8.8 Hz, 2H), 8.04 (d, *J* = 8.7 Hz, 2H), 5.76 – 5.71 (m, 1H), 5.09 – 4.98 (m, 2H), 4.65 (s, 1H), 2.77 (d, *J* = 6.7 Hz, 2H), 1.97 (d, *J* = 7.4 Hz, 2H), 0.88 (s, 6H); <sup>13</sup>C NMR (151 MHz, CDCl<sub>3</sub>)  $\delta$  150.2, 146.1, 134.1, 128.3, 124.5, 118.3, 53.2, 44.2, 34.3, 25.0; HRMS (ESI) calculated for C<sub>13</sub>H<sub>18</sub>N<sub>2</sub>O<sub>4</sub>S [M+H]<sup>+</sup>: 299.1066, found: 299.1068.

### 2.3 General Procedure for Preparation of Substrates **2g-2j**, **2l**

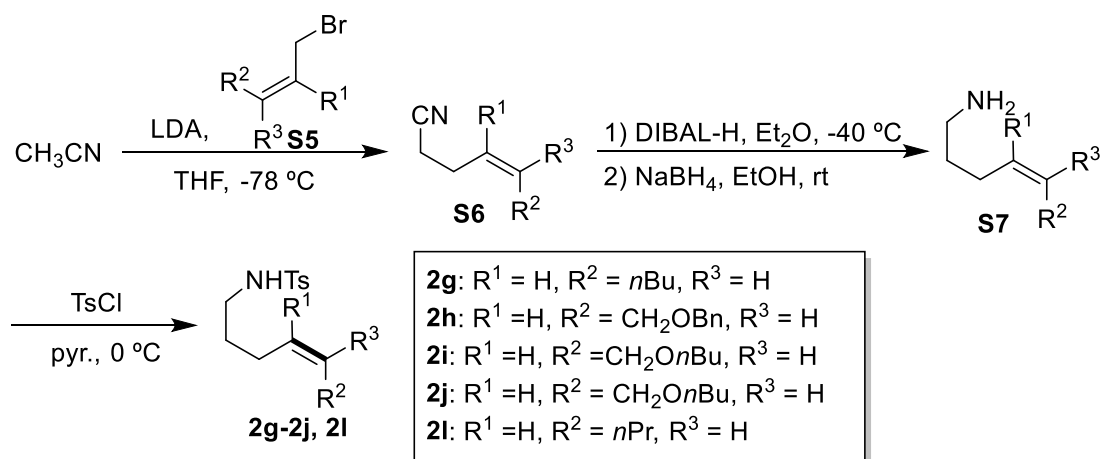

*n*-Butyllithium (2.4 M in hexane, 12 mmol, 1.2 equiv.) was added to the diisopropylamine (12 mmol, 1.2 equiv.) at 0 °C in THF (15 mL). The solution was stirred at 0 °C for 30 min, and then cooled to -78 °C. The solution of acetonitrile (10 mmol, 1.0 equiv.) in THF (5 mL) was added to the reaction mixture slowly. The solution was stirred at -78 °C for 2 h, and then the substituted allyl bromide **S5** (12.5 mmol, 1.2 equiv.) was added. The reaction mixture was stirred overnight. The reaction was quenched with addition of saturated aqueous NH<sub>4</sub>Cl, extracted with Et<sub>2</sub>O and the organic layers were

dried over Na<sub>2</sub>SO<sub>4</sub>, and concentrated. The resultant oil was used without purification in the subsequent step. The DIBAL-H (1.5 M in toluene, 15 mmol, 1.5 equiv.) was added to the alkylated nitrile **S6** in Et<sub>2</sub>O (20 mL) at -40 °C. The reaction mixture was stirred for 3 h and then NaBH<sub>4</sub> (30 mmol, 3.0 equiv.) was added. After 10 min, the EtOH (20 mL) was added to the solution carefully. The reaction mixture was allowed to warm to room temperature and stirred overnight then diluted with Et<sub>2</sub>O (20 mL), extracted with 1 M HCl. The combined acidic extracts were made basic (pH > 13) with 15% NaOH (aq.) and extracted with CH<sub>2</sub>Cl<sub>2</sub>. The combined organic extracts were dried over Na<sub>2</sub>SO<sub>4</sub> and concentrated. The resultant oil was used without purification in the subsequent step. The amine **S7** (5 mmol, 1.0 equiv.) was dissolved in pyridine (10 mL) and cooled to 0 °C. Following addition of the tosyl chloride (5.5 mmol, 1.1 equiv.), the reaction mixture was stirred at room temperature for 4 h. The solution was diluted with Et<sub>2</sub>O (20 mL), then washed with 1 M HCl, dried over Na<sub>2</sub>SO<sub>4</sub> and purified by column chromatography, EtOAc/Hexanes (5%→20% EtOAc) to afford the substrate **2g-2j, 2l**.

**(Z)-4-Methyl-N-(non-4-en-1-yl)benzenesulfonamide 2g**: yield: 2.160 g (80%); (Flash column chromatography eluent, petrol ether/EtOAc = 10/1); colorless oil; <sup>1</sup>H NMR (600 MHz, CDCl<sub>3</sub>) δ 7.74 (d, *J* = 8.1 Hz, 2H), 7.31 (d, *J* = 8.0 Hz, 2H), 5.39 – 5.35 (m, 1H), 5.26 – 5.22 (m, 1H), 4.37 (s, 1H), 2.95 (q, *J* = 6.8 Hz, 2H), 2.43 (s, 3H), 2.01 (q, *J* = 7.2 Hz, 2H), 1.98 – 1.95 (m, 2H), 1.55 – 1.48 (m, 2H), 1.31 – 1.27 (m, 4H), 0.88 (d, *J* = 6.9 Hz, 3H); <sup>13</sup>C NMR (151 MHz, cdcl<sub>3</sub>) δ 143.4, 137.3, 131.5, 129.8, 127.9, 127.2, 43.1, 31.9, 29.7, 27.0, 24.4, 22.4, 21.6, 14.0; HRMS (ESI) calculated for C<sub>16</sub>H<sub>25</sub>NO<sub>2</sub>S [M+H]<sup>+</sup>: 296.1684, found: 296.1692.

**(Z)-N-(6-(Benzyloxy)hex-4-en-1-yl)-4-methylbenzenesulfonamide 2h**: yield: 2.140 g (80%); (Flash column chromatography eluent, petrol ether/EtOAc = 10/1); colorless oil; <sup>1</sup>H NMR (600 MHz, CDCl<sub>3</sub>) δ 7.69 (d, *J* = 7.8 Hz, 2H), 7.42 – 7.22 (m, 7H), 5.68 – 5.57 (m, 1H), 5.49 – 5.47 (m, 1H), 5.02 (s, 1H), 4.55 – 4.51 (m, 2H), 3.99 (d, *J* = 6.7 Hz, 2H), 2.96 – 2.85 (m, 2H), 2.40 (s, 3H), 2.10 – 2.08 (m, 2H), 1.59 – 1.51 (m, 2H); <sup>13</sup>C NMR (151 MHz, CDCl<sub>3</sub>) δ 143.2, 138.2, 137.4, 132.9, 129.7, 128.5, 128.0, 127.8, 127.1, 127.1, 72.5, 65.4, 42.3, 29.1, 24.4, 21.5; HRMS (ESI) calculated for C<sub>20</sub>H<sub>25</sub>NNaO<sub>3</sub>S [M+Na]<sup>+</sup>: 382.1453, found: 382.1460.

**(Z)-N-(6-Butoxyhex-4-en-1-yl)-4-methylbenzenesulfonamide 2i**: yield: 1.150 g (80%); (Flash column chromatography eluent, petrol ether/EtOAc = 10/1); colorless oil; <sup>1</sup>H NMR (600 MHz, CDCl<sub>3</sub>) δ 7.73 (d, *J* = 7.8 Hz, 2H), 7.29 (d, *J* = 7.5 Hz, 2H), 5.59 (s, 1H), 5.46 – 5.44 (m, 1H), 4.92

(s, 1H), 3.95 (d,  $J = 5.8$  Hz, 2H), 3.44 (t,  $J = 6.6$  Hz, 2H), 3.01 – 2.87 (m, 2H), 2.42 (s, 3H), 2.12 (d,  $J = 6.5$  Hz, 2H), 1.56 (s, 4H), 1.36 (d,  $J = 7.2$  Hz, 2H), 0.92 (t,  $J = 7.2$  Hz, 3H);  $^{13}\text{C}$  NMR (151 MHz,  $\text{CDCl}_3$ )  $\delta$  143.3, 137.6, 132.3, 129.7, 127.5, 127.1, 70.7, 66.1, 42.3, 31.8, 29.2, 24.4, 21.6, 19.4, 14.0; **HRMS (ESI)** calculated for  $\text{C}_{17}\text{H}_{27}\text{NNaO}_3\text{S}$   $[\text{M}+\text{Na}]^+$ : 348.1609, found: 348.1617.

**(Z)-N-(6-(Allyloxy)hex-4-en-1-yl)-4-methylbenzenesulfonamide 2j**: yield: 2.130 g (40%); (Flash column chromatography eluent, petrol ether/EtOAc = 10/1); colorless oil;  $^1\text{H}$  NMR (600 MHz,  $\text{CDCl}_3$ )  $\delta$  7.73 (d,  $J = 8.0$  Hz, 2H), 7.30 (d,  $J = 7.8$  Hz, 2H), 6.01 – 5.88 (m, 1H), 5.62 (dd,  $J = 16.7$ , 7.5 Hz, 1H), 5.48 (dd,  $J = 17.3$ , 8.3 Hz, 1H), 5.29 (d,  $J = 17.2$  Hz, 1H), 5.21 (d,  $J = 10.2$  Hz, 1H), 5.00 (s, 1H), 4.01 (d,  $J = 5.4$  Hz, 2H), 3.97 (d,  $J = 6.4$  Hz, 2H), 2.98 – 2.89 (m, 2H), 2.42 (s, 3H), 2.14 (d,  $J = 6.8$  Hz, 2H), 1.63 – 1.55 (m, 2H);  $^{13}\text{C}$  NMR (151 MHz,  $\text{CDCl}_3$ )  $\delta$  143.3, 137.5, 134.7, 132.9, 129.7, 127.1, 127.0, 117.5, 71.6, 65.3, 42.2, 29.1, 24.4, 21.6; **HRMS (ESI)** calculated for  $\text{C}_{16}\text{H}_{23}\text{NNaO}_3\text{S}$   $[\text{M}+\text{Na}]^+$ : 332.1296, found: 332.1297.

**(E)-4-Methyl-N-(oct-4-en-1-yl)benzenesulfonamide 2l**: yield: 1.120 g (80%); (Flash column chromatography eluent, petrol ether/EtOAc = 10/1); white solid; m.p.: 105.2 – 106.5 °C;  $^1\text{H}$  NMR (600 MHz,  $\text{CDCl}_3$ )  $\delta$  7.74 (d,  $J = 7.1$  Hz, 2H), 7.30 (d,  $J = 7.3$  Hz, 2H), 5.41 – 5.31 (m, 1H), 5.31 – 5.20 (m, 1H), 4.38 (s, 1H), 2.94 (d,  $J = 6.0$  Hz, 2H), 2.43 (s, 3H), 1.97 (d,  $J = 6.4$  Hz, 2H), 1.91 (d,  $J = 6.4$  Hz, 2H), 1.55 – 1.47 (m, 2H), 1.39 – 1.28 (m, 2H), 0.86 (t,  $J = 6.6$  Hz, 3H);  $^{13}\text{C}$  NMR (151 MHz,  $\text{CDCl}_3$ )  $\delta$  143.4, 137.3, 131.8, 129.8, 128.7, 127.2, 42.8, 34.7, 29.6, 29.4, 22.7, 21.6, 13.7; **HRMS (ESI)** calculated for  $\text{C}_{15}\text{H}_{23}\text{NO}_2\text{S}$   $[\text{M}+\text{H}]^+$ : 282.1528, found: 282.1534.



### 3. Detailed Optimization of the Reaction Conditions for Asymmetric Halocyclization

**Table S1** | Optimization of oxidative bromocyclization conditions<sup>[a]</sup>

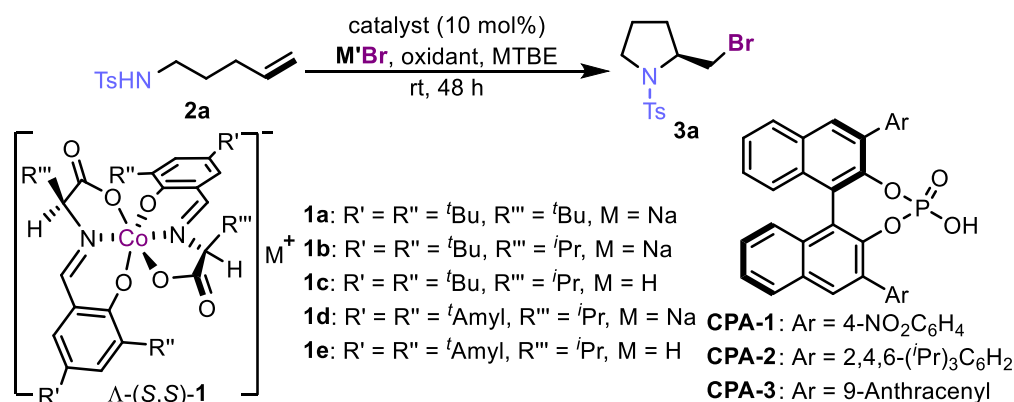

| entry               | catalyst | M'Br | oxidant                                      | yield [%] <sup>[b]</sup> | e.r. <sup>[c]</sup> |
|---------------------|----------|------|----------------------------------------------|--------------------------|---------------------|
| 1                   | Λ-1a     | NaBr | Oxone                                        | 95                       | 60:40               |
| 2                   | Λ-1b     | NaBr | Oxone                                        | 97                       | 94.5:5.5            |
| 3                   | Λ-1c     | NaBr | Oxone                                        | 98                       | 94:6                |
| 4                   | Λ-1d     | NaBr | Oxone                                        | 91                       | 90:10               |
| 5                   | Λ-1e     | NaBr | Oxone                                        | 89                       | 90.5:9.5            |
| 6                   | CPA-1    | NaBr | Oxone                                        | 90                       | 51:49               |
| 7                   | CPA-2    | NaBr | Oxone                                        | 88                       | 50.5:49.5           |
| 8                   | CPA-3    | NaBr | Oxone                                        | 86                       | 54:46               |
| 9                   | Λ-1b     | KBr  | Oxone                                        | 69                       | 94:6                |
| 10                  | Λ-1b     | LiBr | Oxone                                        | 88                       | 93.5:6.5            |
| 11                  | Λ-1b     | TBAB | Oxone                                        | 93                       | 78.5:21.5           |
| 12                  | Λ-1b     | NaBr | K <sub>2</sub> S <sub>2</sub> O <sub>8</sub> | 51                       | 89:11               |
| 13                  | Λ-1b     | NaBr | <i>m</i> CPBA                                | trace                    | -                   |
| 14                  | Λ-1b     | NaBr | CAN                                          | 46                       | 89:11               |
| 15 <sup>[d]</sup>   | Λ-1b     | NaBr | Oxone                                        | 97                       | 97:3                |
| 16 <sup>[d,e]</sup> | Λ-1b     | NaBr | Oxone                                        | 95                       | 97:3                |
| 17 <sup>[d,f]</sup> | Λ-1b     | NaBr | Oxone                                        | 95                       | 97:3                |
| 18 <sup>[d,g]</sup> | Λ-1b     | NaBr | Oxone                                        | 92                       | 96.5:3.5            |

[a] Reaction conditions: **2a** (0.10 mmol), M'Br (0.10 mmol), oxidant (0.30 mmol), and catalyst (Λ-1 or CPA-1–3, 0.01 mmol) in MTBE (2.0 mL) at room temperature unless otherwise noted. [b] Isolated yields were based on **2a**. [c] e.r. values were determined by chiral stationary HPLC. [d] Run at 0 °C. [e] 1.0 mol% catalyst was used. [f] 0.5 mol% catalyst was used. [g] 0.1 mol% catalyst was used.

**Table S2** | Optimization of oxidative iodocyclization conditions<sup>[a]</sup>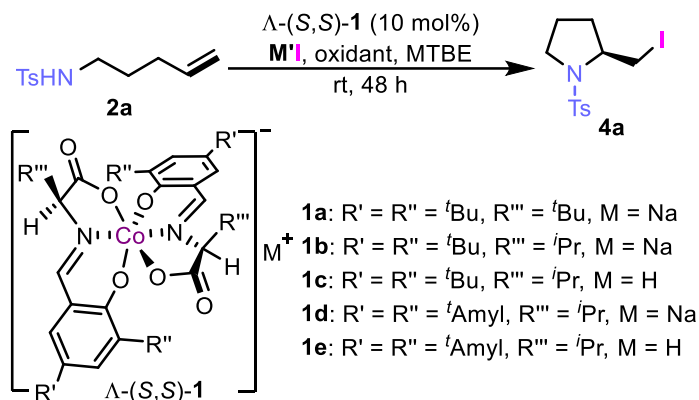

| Entry                 | Δ-(S,S)-1 | M'I  | yield [%] <sup>[b]</sup> | e.r. <sup>[c]</sup> |
|-----------------------|-----------|------|--------------------------|---------------------|
| 1                     | Δ-1a      | NaI  | 71                       | 60:40               |
| 2                     | Δ-1b      | NaI  | 98                       | 84.5:15.5           |
| 3                     | Δ-1c      | NaI  | 94                       | 84:16               |
| 4                     | Δ-1d      | NaI  | 98                       | 80.5:19.5           |
| 5                     | Δ-1e      | NaI  | 87                       | 80:20               |
| 6                     | Δ-1b      | KI   | 94                       | 84:16               |
| 7                     | Δ-1b      | TBAI | 94                       | 78:22               |
| 8 <sup>[d]</sup>      | Δ-1b      | NaI  | 95                       | 89.5:10.5           |
| 9 <sup>[d,f]</sup>    | Δ-1b      | NaI  | 95                       | 89.5:10.5           |
| 10 <sup>[e,f]</sup>   | Δ-1b      | NaI  | 92                       | 92.5:7.5            |
| 11 <sup>[e,f,g]</sup> | Δ-1b      | NaI  | 92                       | 92.5:7.5            |
| 12 <sup>[e,f,h]</sup> | Δ-1b      | NaI  | 79                       | 82:18               |

[a] Reaction conditions: **2a** (0.10 mmol), M'I (0.10 mmol), Oxone (0.30 mmol), and Δ-(S,S)-1 (0.01 mmol) in MTBE (2.0 mL) at room temperature unless otherwise noted. [b] Isolated yields were based on **2a**. [c] e.r. values were determined by chiral stationary HPLC. [d] Run at 0 °C. [e] Run at -15 °C. [f] Oxone (0.50 mmol) was employed. [g] 1.0 mol% catalyst was used. [h] 0.5 mol% catalyst was used.

**Table S3** | Optimization of oxidative chlorocyclization conditions<sup>[a]</sup>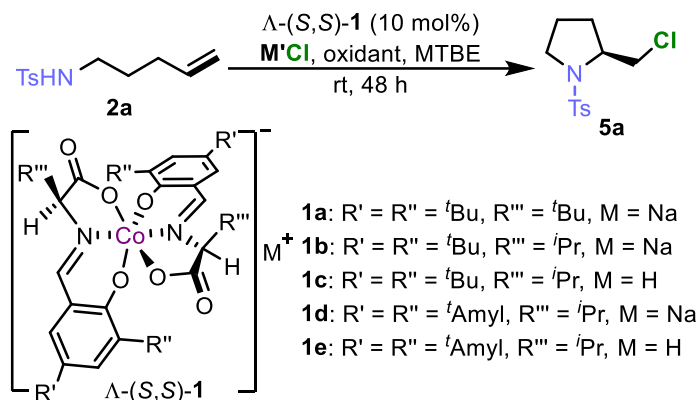

| Entry                 | $\Lambda$ -( <i>S,S</i> )-1 | M'Cl               | yield [%] <sup>[b]</sup> | e.r. <sup>[c]</sup> |
|-----------------------|-----------------------------|--------------------|--------------------------|---------------------|
| 1                     | $\Lambda$ -1a               | NH <sub>4</sub> Cl | 76                       | 62.5:37.5           |
| 2                     | $\Lambda$ -1b               | NH <sub>4</sub> Cl | 83                       | 83:17               |
| 3                     | $\Lambda$ -1c               | NH <sub>4</sub> Cl | 55                       | 83.5:16.5           |
| 4                     | $\Lambda$ -1d               | NH <sub>4</sub> Cl | 59                       | 81:19               |
| 5                     | $\Lambda$ -1e               | NH <sub>4</sub> Cl | 60                       | 81:19               |
| 6                     | $\Lambda$ -1b               | NaCl               | 35                       | 82.5:17.5           |
| 7                     | $\Lambda$ -1b               | KCl                | 37                       | 83:17               |
| 8                     | $\Lambda$ -1b               | LiCl               | 86                       | 79.5:20.5           |
| 9                     | $\Lambda$ -1b               | TBAC               | 37                       | 56.5:43.5           |
| 10 <sup>[d]</sup>     | $\Lambda$ -1b               | NH <sub>4</sub> Cl | 85                       | 83.5:16.5           |
| 11 <sup>[d,e]</sup>   | $\Lambda$ -1b               | NH <sub>4</sub> Cl | 81                       | 77.5:22.5           |
| 12 <sup>[d,e,f]</sup> | $\Lambda$ -1b               | NH <sub>4</sub> Cl | 62                       | 70.5:29.5           |
| 13 <sup>[d,e,g]</sup> | $\Lambda$ -1b               | NH <sub>4</sub> Cl | 60                       | 60:40               |

[a] Reaction conditions: **2a** (0.10 mmol), M'Cl (0.10 mmol), Oxone (0.50 mmol), and  $\Lambda$ -(*S,S*)-1 (0.01 mmol) in MTBE (2.0 mL) at room temperature unless otherwise noted. [b] Isolated yields were based on **2a**. [c] e.r. values were determined by chiral stationary HPLC. [d] Oxone (1.00 mmol) was employed. [e] Run at 0 °C. [f] 5.0 mol% catalyst was used. [g] 1.0 mol% catalyst was used.

## 4. General Procedure for the Enantioselective Halocyclizations and Characterization Data

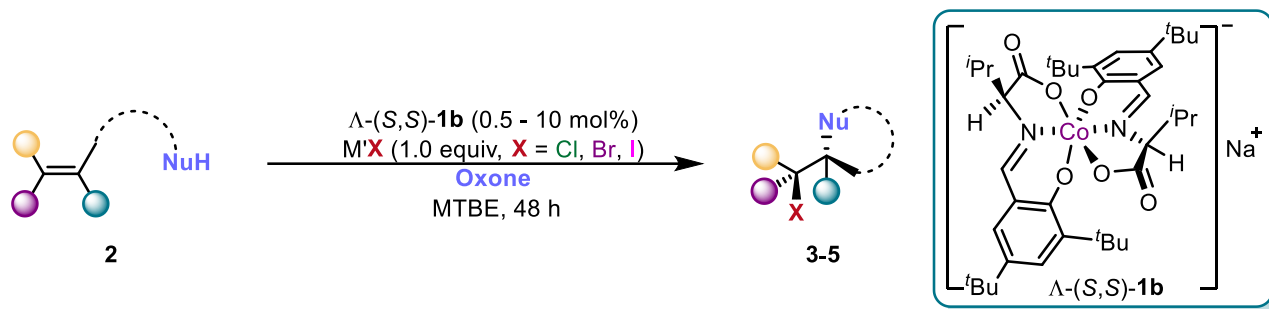

A 10mL oven-dried vial was charged with alkenes **2** (0.10 mmol), catalyst **1b** (0.5-10 mol%),  $M'X$  (0.10 mmol), and MTBE (2 mL) at room temperature. The mixture was cooled to the corresponding temperature and stirred for 15 min. The Oxone (0.3-1.0 mmol) was added and the resulting solution was stirred vigorously until the reaction was complete (monitored by TLC). The reaction was saturated aqueous  $Na_2S_2O_3$  (0.2 mL). The mixture was purified by flash column chromatography (silica gel, petrol ether/EtOAc = 5:1) to give the enantioenriched products.

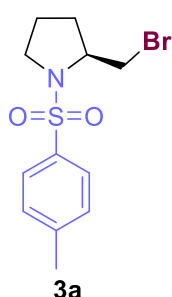

**(S)-2-(bromomethyl)-1-tosylpyrrolidine 3a**: yield: 30.2 mg (95%); (Flash column chromatography eluent, petroleum ether/ethyl acetate = 5/1); colorless oil;  $[\alpha]_D^{20} = -29.4$  (c 0.30  $CH_2Cl_2$ );  $^1H$  NMR (600 MHz,  $CDCl_3$ )  $\delta$  7.73 (d,  $J = 8.0$  Hz, 2H), 7.34 (d,  $J = 7.9$  Hz, 2H), 3.83 (t,  $J = 8.7$  Hz, 1H), 3.77 (dd,  $J = 9.8, 2.9$  Hz, 1H), 3.50 – 3.44 (m, 1H), 3.36 (t,  $J = 9.7$  Hz, 1H), 3.18 – 3.14 (m, 1H), 2.44 (s, 3H), 1.96 – 1.93 (m, 1H), 1.89 – 1.79 (m, 1H), 1.76 – 1.72 (m, 1H), 1.58 – 1.52 (m, 1H);  $^{13}C$  NMR

(151 MHz,  $CDCl_3$ )  $\delta$  143.8, 134.5, 129.9, 127.7, 60.5, 49.9, 36.1, 30.5, 23.9, 21.6; **HRMS (ESI)** calculated for  $C_{12}H_{17}^{79}BrNO_2S$   $[M+H]^+$ : 318.0163, found: 318.0158; **HRMS (ESI)** calculated for  $C_{12}H_{17}^{81}BrNO_2S$   $[M+H]^+$ : 320.0143, found: 320.0148; **Enantiomeric ratio**: 97:3, determined by HPLC (Daicel Chirapak IA, isopropanol / hexanel = 20/80, flow rate = 1.0 mL/min,  $T = 30$  °C,  $\lambda = 254$  nm):  $t_R = 7.17$  min (major),  $t_R = 7.72$  min (minor).

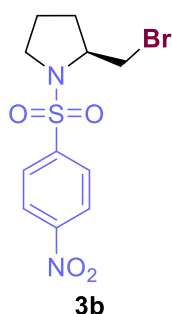

**(S)-2-(bromomethyl)-1-((4-nitrophenyl)sulfonyl)pyrrolidine 3b** yield: 30.4 mg (87%); (Flash column chromatography eluent, petroleum ether/ethyl acetate = 5/1); white solid; m.p.: 114.5 – 115.7 °C;  $[\alpha]_D^{20} = +50.7$  (c 0.30  $CH_2Cl_2$ );  $^1H$  NMR (600 MHz,  $CDCl_3$ )  $\delta$  8.40 (d,  $J = 8.3$  Hz, 2H), 8.05 (d,  $J = 8.3$  Hz, 2H), 3.90 (t,  $J = 8.2$  Hz, 1H), 3.74 (d,  $J = 9.9$  Hz, 1H), 3.58 – 3.49 (m, 1H), 3.42 (t,  $J = 9.5$  Hz, 1H), 3.22 –

3.19 (m, 1H), 2.08 – 1.98 (m, 1H), 1.95 – 1.93 (m, 1H), 1.83 – 1.81 (m, 1H), 1.67 – 1.64 (m, 1H);  $^{13}\text{C}$  NMR (151 MHz,  $\text{CDCl}_3$ )  $\delta$  150.4, 143.4, 128.7, 124.5, 60.7, 49.9, 35.6, 30.5, 24.0; **HRMS (ESI)** calculated for  $\text{C}_{11}\text{H}_{14}^{79}\text{BrN}_2\text{O}_4\text{S}$   $[\text{M}+\text{H}]^+$ : 348.9858, found: 348.9866; **HRMS (ESI)** calculated for  $\text{C}_{11}\text{H}_{14}^{81}\text{BrN}_2\text{O}_4\text{S}$   $[\text{M}+\text{H}]^+$ : 350.9837, found: 350.9843; **Enantiomeric ratio**: 95:5, determined by HPLC (Daicel Chirapak IC, isopropanol / hexanel = 30/70, flow rate = 1.0 mL/min, T = 30 °C,  $\lambda$  = 254 nm):  $t_{\text{R}}$  = 18.52 min (major),  $t_{\text{R}}$  = 16.64 min (minor).

**(S)-2-(bromomethyl)-1-((3-nitrophenyl)sulfonyl)pyrrolidine 3c**: yield: 32.8 mg (94%); (Flash

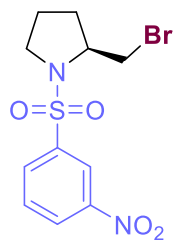

**3c**

column chromatography eluent, petroleum ether/ethyl acetate = 5/1); white solid; m.p.: 105.3 – 106.5 °C;  $[\alpha]_{\text{D}}^{20}$  = +75.7 (c 0.33  $\text{CH}_2\text{Cl}_2$ );  $^1\text{H}$  NMR (600 MHz,  $\text{CDCl}_3$ )  $\delta$  8.69 (s, 1H), 8.48 (d,  $J$  = 8.1 Hz, 1H), 8.19 (d,  $J$  = 7.7 Hz, 1H), 7.79 (t,  $J$  = 8.0 Hz, 1H), 3.99 – 3.88 (m, 1H), 3.74 (dd,  $J$  = 10.1, 3.0 Hz, 1H), 3.59 – 3.50 (m, 1H), 3.44 (t,  $J$  = 9.5 Hz, 1H), 3.29 – 3.18 (m, 1H), 2.05 – 2.02 (m, 1H), 1.96 – 1.94 (m, 1H), 1.85 – 1.81 (m, 1H), 1.68 – 1.66 (m, 1H);  $^{13}\text{C}$  NMR (151 MHz,  $\text{CDCl}_3$ )  $\delta$  148.6, 140.1, 132.9, 130.7, 127.4, 122.6, 60.7, 50.0, 35.7, 30.5, 24.1; **HRMS (ESI)** calculated for  $\text{C}_{11}\text{H}_{14}^{79}\text{BrN}_2\text{O}_4\text{S}$   $[\text{M}+\text{H}]^+$ : 348.9858, found: 348.9860; **HRMS (ESI)** calculated for  $\text{C}_{11}\text{H}_{14}^{81}\text{BrN}_2\text{O}_4\text{S}$   $[\text{M}+\text{H}]^+$ : 350.9837, found: 350.9842; **Enantiomeric ratio**: 96:4, determined by HPLC (Daicel Chirapak IB, isopropanol / hexanel = 10/90, flow rate = 1.0 mL/min, T = 30 °C,  $\lambda$  = 254 nm):  $t_{\text{R}}$  = 19.28 min (major),  $t_{\text{R}}$  = 18.26 min (minor).

**(S)-2-(bromomethyl)-1-((2-nitrophenyl)sulfonyl)pyrrolidine 3d**: yield: 31.0 mg (89%); (Flash

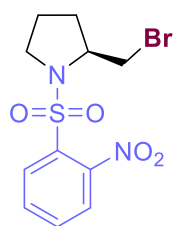

**3d**

column chromatography eluent, petroleum ether/ethyl acetate = 5/1); white solid; m.p.: 100.1 – 101.3 °C;  $[\alpha]_{\text{D}}^{20}$  = +29.4 (c 0.31  $\text{CH}_2\text{Cl}_2$ );  $^1\text{H}$  NMR (600 MHz,  $\text{CDCl}_3$ )  $\delta$  8.03 (d,  $J$  = 7.5 Hz, 1H), 7.78 – 7.65 (m, 2H), 7.64 – 7.55 (m, 1H), 4.27 – 4.17 (m, 1H), 3.67 – 3.65 (m, 1H), 3.55 – 3.48 (m, 1H), 3.48 – 3.41 (m, 1H), 3.39 (t,  $J$  = 9.5 Hz, 1H), 2.12 – 2.02 (m, 2H), 2.03 – 1.93 (m, 1H), 1.84 – 1.81 (m, 1H);  $^{13}\text{C}$  NMR (151 MHz,  $\text{CDCl}_3$ )  $\delta$  148.6, 133.9, 131.8, 131.6, 131.0, 124.2, 60.5, 49.8, 35.4, 30.6, 24.1; **HRMS (ESI)** calculated for  $\text{C}_{11}\text{H}_{14}^{79}\text{BrN}_2\text{O}_4\text{S}$   $[\text{M}+\text{H}]^+$ : 348.9858, found: 348.9862; **HRMS (ESI)** calculated for  $\text{C}_{11}\text{H}_{14}^{81}\text{BrN}_2\text{O}_4\text{S}$   $[\text{M}+\text{H}]^+$ : 350.9837, found: 350.9843; **Enantiomeric ratio**: 95:5, determined by HPLC (Daicel Chirapak ID, isopropanol / hexanel = 20/80, flow rate = 1.0 mL/min, T = 30 °C,  $\lambda$  = 254 nm):  $t_{\text{R}}$  = 21.52 min (major),  $t_{\text{R}}$  = 23.04 min (minor).

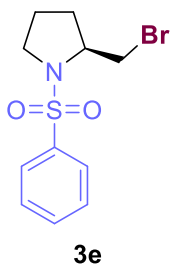

**(S)-2-(bromomethyl)-1-(phenylsulfonyl)pyrrolidine 3e:** yield: 28.8 mg (95%); (Flash column chromatography eluent, petroleum ether/ethyl acetate = 5/1); colorless oil;  $[\alpha]_D^{20} = -110.3$  (c 0.29 CH<sub>2</sub>Cl<sub>2</sub>); <sup>1</sup>H NMR (600 MHz, CDCl<sub>3</sub>) δ 7.86 (d, *J* = 7.6 Hz, 2H), 7.62 (t, *J* = 7.3 Hz, 1H), 7.55 (d, *J* = 7.6 Hz, 2H), 3.87 (t, *J* = 8.5 Hz, 1H), 3.80 – 3.75 (m, 1H), 3.51 – 3.44 (m, 1H), 3.37 (t, *J* = 9.7 Hz, 1H), 3.21 – 3.17 (m, 1H), 1.99 – 1.92 (m, 1H), 1.88 – 1.84 (m, 1H), 1.78 – 1.74 (m, 1H), 1.56 (s, 1H); <sup>13</sup>C NMR (151 MHz, CDCl<sub>3</sub>) δ 137.4, 133.0, 129.3, 127.6, 60.5, 49.9, 36.0, 30.4, 23.9; **HRMS (ESI)** calculated for C<sub>11</sub>H<sub>15</sub><sup>79</sup>BrNO<sub>2</sub>S [M+H]<sup>+</sup>: 304.0007, found: 304.0002; **HRMS (ESI)** calculated for C<sub>11</sub>H<sub>15</sub><sup>81</sup>BrNO<sub>2</sub>S [M+H]<sup>+</sup>: 305.9986, found: 305.9984; **Enantiomeric ratio:** 96.5:3.5, determined by HPLC (Daicel Chirapak IA, isopropanol / hexanel = 10/90, flow rate = 1.0 mL/min, T = 30 °C, λ = 254 nm): t<sub>R</sub> = 10.36 min (major), t<sub>R</sub> = 11.31 min (minor).

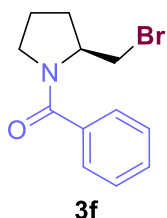

**(S)-2-(bromomethyl)pyrrolidin-1-yl(phenyl)methanone 3f:** yield: 24.1 mg (90%); (Flash column chromatography eluent, petroleum ether/ethyl acetate = 5/1); colorless oil;  $[\alpha]_D^{20} = -6.9$  (c 0.24 CH<sub>2</sub>Cl<sub>2</sub>); <sup>1</sup>H NMR (600 MHz, CDCl<sub>3</sub>) δ 7.75 (d, *J* = 7.6 Hz, 2H), 7.49 (t, *J* = 7.2 Hz, 1H), 7.43 (t, *J* = 7.5 Hz, 2H), 4.25 – 4.21 (m, 1H), 3.87 – 3.83 (m, 1H), 3.62 (t, *J* = 10.1 Hz, 1H), 3.52 (q, *J* = 6.5 Hz, 2H), 2.28 – 2.24 (m, 1H), 1.96 – 1.84 (m, 2H), 1.80 – 1.76 (m, 1H); <sup>13</sup>C NMR (151 MHz, CDCl<sub>3</sub>) δ 167.7, 134.7, 131.6, 128.7, 126.9, 52.2, 39.2, 36.1, 33.5, 27.3; **HRMS (ESI)** calculated for C<sub>12</sub>H<sub>15</sub><sup>79</sup>BrNO [M+H]<sup>+</sup>: 268.0337, found: 268.0340; **HRMS (ESI)** calculated for C<sub>12</sub>H<sub>15</sub><sup>81</sup>BrNO [M+H]<sup>+</sup>: 270.0317, found: 270.0319; **Enantiomeric ratio:** 96:4, determined by HPLC (Daicel Chirapak IA, isopropanol / hexanel = 20/80, flow rate = 1.0 mL/min, T = 30 °C, λ = 254 nm): t<sub>R</sub> = 9.40 min (major), t<sub>R</sub> = 10.97 min (minor).

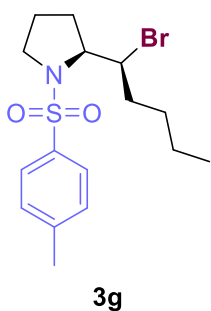

**(S)-2-((S)-1-bromopentyl)-1-tosylpyrrolidine 3g:** yield: 33.3 mg (89%); (Flash column chromatography eluent, petroleum ether/ethyl acetate = 5/1); colorless oil;  $[\alpha]_D^{20} = -45.5$  (c 0.34 CH<sub>2</sub>Cl<sub>2</sub>); <sup>1</sup>H NMR (600 MHz, CDCl<sub>3</sub>) δ 7.65 (d, *J* = 8.0 Hz, 2H), 7.27 (d, *J* = 7.9 Hz, 2H), 4.43 (d, *J* = 11.8 Hz, 1H), 3.90 – 3.88 (m, 1H), 3.42 – 3.38 (m, 1H), 3.28 – 3.17 (m, 1H), 2.37 (s, 3H), 1.99 – 1.89 (m, 2H), 1.79 – 1.64 (m, 2H), 1.56 – 1.52 (m, 2H), 1.39 – 1.29 (m, 3H), 1.29 – 1.23 (m, 1H), 0.86 (t, *J* = 7.0 Hz, 3H); <sup>13</sup>C NMR (151 MHz, CDCl<sub>3</sub>) δ 143.8, 134.1, 129.9, 127.7, 64.4, 59.0, 51.0, 31.1, 30.3, 27.7, 24.5, 22.2, 21.6, 14.0; **HRMS (ESI)** calculated for C<sub>16</sub>H<sub>25</sub><sup>79</sup>BrNO<sub>2</sub>S [M+H]<sup>+</sup>: 374.0789, found:

374.0798; **HRMS (ESI)** calculated for  $C_{16}H_{25}^{81}BrNO_2S$   $[M+H]^+$ : 376.0769, found: 376.0780; **Enantiomeric ratio**: 96.5:3.5, determined by HPLC (Daicel Chirapak IC, isopropanol / hexanel = 30/70, flow rate = 1.0 mL/min,  $T = 30\text{ }^\circ\text{C}$ ,  $\lambda = 254\text{ nm}$ ):  $t_R = 7.33\text{ min}$  (major),  $t_R = 6.77\text{ min}$  (minor).

**(S)-2-((R)-2-(benzyloxy)-1-bromoethyl)-1-tosylpyrrolidine 3h**: yield: 37.2 mg (85%); (Flash

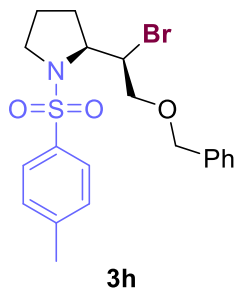

column chromatography eluent, petroleum ether/ethyl acetate = 5/1); colorless oil;

$[\alpha]_D^{20} = +75.6$  (c 0.37  $CH_2Cl_2$ );  **$^1H$  NMR** (600 MHz,  $CDCl_3$ )  $\delta$  7.71 (t,  $J = 9.7$  Hz, 2H), 7.39 – 7.30 (m, 7H), 4.65 (d,  $J = 11.8$  Hz, 1H), 4.62 – 4.55 (m, 2H), 4.09 – 4.03 (m, 1H), 3.98 (dd,  $J = 10.8, 4.9$  Hz, 1H), 3.87 (dd,  $J = 10.8, 6.6$  Hz, 1H), 3.46 – 3.38 (m, 1H), 3.30 (m, 1H), 2.43 (s, 3H), 2.09 – 2.00 (m, 1H), 1.82 – 1.69

(m, 2H), 1.39 – 1.29 (m, 1H);  **$^{13}C$  NMR** (151 MHz,  $CDCl_3$ )  $\delta$  143.9, 138.0, 134.3, 129.9, 128.5, 127.9, 127.8, 127.7, 73.3, 70.6, 62.3, 55.0, 50.9, 29.0, 24.4, 21.6; **HRMS (ESI)** calculated for  $C_{20}H_{25}^{79}BrNO_3S$   $[M+H]^+$ : 438.0739, found: 438.0740; **HRMS (ESI)** calculated for  $C_{20}H_{25}^{81}BrNO_3S$   $[M+H]^+$ : 440.0718, found: 440.0721; **Enantiomeric ratio**: 95.5:4.5, determined by HPLC (Daicel Chirapak IB, isopropanol / hexanel = 10/90, flow rate = 1.0 mL/min,  $T = 30\text{ }^\circ\text{C}$ ,  $\lambda = 254\text{ nm}$ ):  $t_R = 10.64\text{ min}$  (major),  $t_R = 8.73\text{ min}$  (minor).

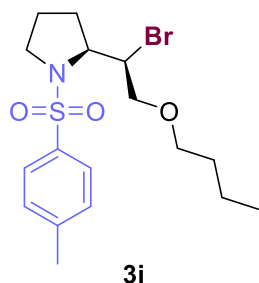

**(S)-2-((R)-1-bromo-2-butoxyethyl)-1-tosylpyrrolidine 3i**: yield: 36.7 mg

(91%); (Flash column chromatography eluent, petroleum ether/ethyl acetate =

5/1); colorless oil;  $[\alpha]_D^{20} = +100.4$  (c 0.37  $CH_2Cl_2$ );  **$^1H$  NMR** (600 MHz,  $CDCl_3$ )  $\delta$  7.73 (d,  $J = 8.0$  Hz, 2H), 7.34 (d,  $J = 8.0$  Hz, 2H), 4.59 – 4.51 (m, 1H), 4.04 – 4.02 (m, 1H), 3.91 – 3.88 (m, 1H), 3.82 – 3.78 (m, 1H), 3.57 – 3.43

(m, 3H), 3.30 (m, 1H), 2.44 (s, 3H), 2.10 – 2.06 (m, 1H), 1.81 – 1.73 (m, 2H), 1.63 – 1.55 (m, 2H), 1.45 – 1.35 (m, 3H), 0.93 (t,  $J = 7.4$  Hz, 3H);  **$^{13}C$  NMR** (151 MHz,  $CDCl_3$ )  $\delta$  143.9, 134.3, 129.9, 127.7, 71.2, 71.0, 62.5, 55.1, 50.9, 31.9, 28.8, 24.4, 21.6, 19.4, 14.0; **HRMS (ESI)** calculated for  $C_{17}H_{27}^{79}BrNO_3S$   $[M+H]^+$ : 404.0895, found: 404.0899; **HRMS (ESI)** calculated for  $C_{17}H_{27}^{81}BrNO_3S$   $[M+H]^+$ : 406.0875, found: 406.0885; **Enantiomeric ratio**: 96.5:3.5, determined by HPLC (Daicel Chirapak IC, isopropanol / hexanel = 30/70, flow rate = 1.0 mL/min,  $T = 30\text{ }^\circ\text{C}$ ,  $\lambda = 254\text{ nm}$ ):  $t_R = 10.54\text{ min}$  (major),  $t_R = 7.69\text{ min}$  (minor).

**(S)-2-((R)-2-(allyloxy)-1-bromoethyl)-1-tosylpyrrolidine 3j**: yield: 34.9 mg (90%); (Flash column chromatography eluent, petroleum ether/ethyl acetate = 5/1); colorless oil;  $[\alpha]_D^{20} = +55.7$  (c 0.35

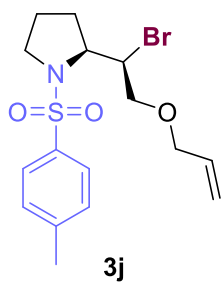

CH<sub>2</sub>Cl<sub>2</sub>); <sup>1</sup>H NMR (600 MHz, CDCl<sub>3</sub>) δ 7.73 (d, *J* = 8.1 Hz, 2H), 7.33 (d, *J* = 8.9 Hz, 2H), 5.95 – 5.89 (m, 1H), 5.33 – 5.30 (m, 1H), 5.22 (d, *J* = 12.6 Hz, 1H), 4.56 – 4.53 (m, 1H), 4.10 – 4.00 (m, 3H), 3.93 (dd, *J* = 10.9, 4.7 Hz, 1H), 3.83 (dd, *J* = 10.9, 6.8 Hz, 1H), 3.50 – 3.44 (m, 1H), 3.35 – 3.28 (m, 1H), 2.44 (s, 3H), 2.11 – 2.02 (m, 1H), 1.82 – 1.72 (m, 2H), 1.38 – 1.34 (m, 1H); <sup>13</sup>C NMR (151 MHz, CDCl<sub>3</sub>) δ 143.9, 134.5, 134.3, 129.9, 127.8, 117.4, 72.2, 70.4, 62.4, 55.0, 51.0, 28.9, 24.4, 21.6; **HRMS (ESI)** calculated for C<sub>16</sub>H<sub>23</sub><sup>79</sup>BrNO<sub>3</sub>S [M+H]<sup>+</sup>:388.0582, found: 388.0588; **HRMS (ESI)** calculated for C<sub>16</sub>H<sub>23</sub><sup>81</sup>BrNO<sub>3</sub>S [M+H]<sup>+</sup>:390.0562, found: 390.0570; **Enantiomeric ratio**: 96.5:3.5, determined by HPLC (Daicel Chirapak IC, isopropanol / hexanel = 30/70, flow rate = 1.0 mL/min, T = 30 °C, λ = 254 nm): t<sub>R</sub> = 11.66 min (major), t<sub>R</sub> = 9.35 min (minor).

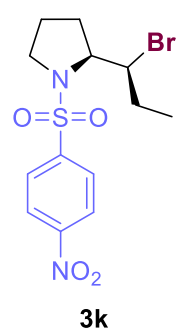

**(S)-2-((S)-1-bromopropyl)-1-((4-nitrophenyl)sulfonyl)pyrrolidine 3k**: yield: 33.5 mg (89%); (Flash column chromatography eluent, petroleum ether/ethyl acetate = 5/1); white solid; m.p.: 113.7 – 114.5 °C; [α]<sub>D</sub><sup>20</sup> = +18.9 (c 0.34 CH<sub>2</sub>Cl<sub>2</sub>); <sup>1</sup>H NMR (600 MHz, CDCl<sub>3</sub>) δ 8.44 (d, *J* = 8.5 Hz, 2H), 8.04 (d, *J* = 8.5 Hz, 2H), 4.39 (d, *J* = 11.4 Hz, 1H), 4.03 – 3.95 (m, 1H), 3.57 – 3.48 (m, 1H), 3.34 – 3.26 (m, 1H), 2.12 – 1.99 (m, 2H), 1.87 – 1.84 (m, 2H), 1.63 – 1.53 (m, 1H), 1.47 (q, *J* = 6.2 Hz, 1H), 1.10 (t, *J* = 7.1 Hz, 3H); <sup>13</sup>C NMR (151 MHz, CDCl<sub>3</sub>) δ 150.4, 142.9, 128.8, 124.5, 64.8, 60.4, 51.1, 27.9, 25.0, 24.5, 13.0; **HRMS (ESI)** calculated for C<sub>13</sub>H<sub>18</sub><sup>79</sup>BrN<sub>2</sub>O<sub>4</sub>S [M+H]<sup>+</sup>: 377.0171, found: 377.0175; **HRMS (ESI)** calculated for C<sub>13</sub>H<sub>18</sub><sup>81</sup>BrN<sub>2</sub>O<sub>4</sub>S [M+H]<sup>+</sup>: 379.0150, found: 379.0158; **Enantiomeric ratio**: 94.5:5.5, determined by HPLC (Daicel Chirapak IB, isopropanol / hexanel = 10/90, flow rate = 1.0 mL/min, T = 30 °C, λ = 254 nm): t<sub>R</sub> = 19.21 min (major), t<sub>R</sub> = 16.63 min (minor).

**(S)-2-((R)-1-bromobutyl)-1-tosylpyrrolidine 3l**: yield: 32.0 mg (89%); (Flash column

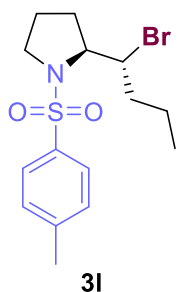

chromatography eluent, petroleum ether/ethyl acetate = 5/1); colorless oil; [α]<sub>D</sub><sup>20</sup> = -24.3 (c 0.32 CH<sub>2</sub>Cl<sub>2</sub>); <sup>1</sup>H NMR (600 MHz, CDCl<sub>3</sub>) δ 7.74 (d, *J* = 8.2 Hz, 2H), 7.32 (d, *J* = 8.1 Hz, 2H), 4.59 – 4.56 (m, 1H), 3.79 – 3.72 (m, 1H), 3.43 – 3.29 (m, 2H), 2.44 (s, 3H), 2.00 – 1.98 (m, 1H), 1.90 – 1.86 (m, 1H), 1.83 – 1.70 (m, 3H), 1.70 – 1.62 (m, 1H), 1.46 – 1.42 (m, 1H), 1.40 – 1.33 (m, 1H), 0.96 (t, *J* = 7.3 Hz, 3H); <sup>13</sup>C NMR (151 MHz, CDCl<sub>3</sub>) δ 143.7, 135.8, 129.8, 127.6, 64.0, 62.2, 49.5, 38.1, 28.1, 24.9, 21.6, 21.3, 13.5; **HRMS (ESI)** calculated for C<sub>15</sub>H<sub>23</sub><sup>79</sup>BrNO<sub>2</sub>S [M+H]<sup>+</sup>: 360.0633, found: 360.0640; **HRMS (ESI)** calculated for C<sub>15</sub>H<sub>23</sub><sup>81</sup>BrNO<sub>2</sub>S [M+H]<sup>+</sup>: 362.0612, found: 362.0620; **Enantiomeric ratio**:



78:22, determined by HPLC (Daicel Chirapak IA, isopropanol / hexanel = 10/90, flow rate = 1.0 mL/min, T = 30 °C,  $\lambda$  = 254 nm):  $t_R$  = 10.45 min (major),  $t_R$  = 9.66 min (minor).

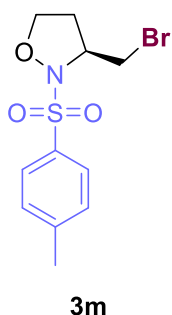

**3m**

**(S)-3-(bromomethyl)-2-tosylisoxazolidine 3m:** yield: 28.4 mg (89%); (Flash column chromatography eluent, petroleum ether/ethyl acetate = 5/1); colorless oil;  $[\alpha]_D^{20}$  = +47.4 (c 0.28 CH<sub>2</sub>Cl<sub>2</sub>); <sup>1</sup>H NMR (600 MHz, CDCl<sub>3</sub>)  $\delta$  7.86 (d,  $J$  = 7.9 Hz, 2H), 7.36 (d,  $J$  = 7.9 Hz, 2H), 4.54 – 4.45 (m, 1H), 4.06 – 3.96 (m, 2H), 3.65 (dd,  $J$  = 10.0, 4.8 Hz, 1H), 3.35 (t,  $J$  = 9.6 Hz, 1H), 2.53 – 2.48 (m, 1H), 2.45 (s, 3H), 2.28 – 2.19 (m, 1H); <sup>13</sup>C NMR (151 MHz, CDCl<sub>3</sub>)  $\delta$  145.4, 132.8, 129.9, 129.3, 70.3, 60.0,

34.4, 34.3, 21.8; **HRMS (ESI)** calculated for C<sub>11</sub>H<sub>15</sub><sup>79</sup>BrNO<sub>3</sub>S [M+H]<sup>+</sup>:319.9956, found: 319.9952; **HRMS (ESI)** calculated for C<sub>11</sub>H<sub>15</sub><sup>81</sup>BrNO<sub>3</sub>S [M+H]<sup>+</sup>:321.9936, found: 321.9945; **Enantiomeric ratio:** 93:7, determined by HPLC (Daicel Chirapak IA, isopropanol / hexanel = 10/90, flow rate = 1.0 mL/min, T = 30 °C,  $\lambda$  = 254 nm):  $t_R$  = 11.43 min (major),  $t_R$  = 10.50 min (minor).

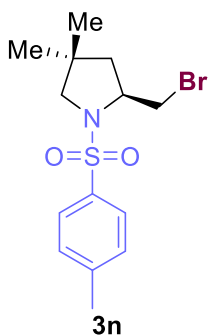

**3n**

**(S)-2-(bromomethyl)-4,4-dimethyl-1-tosylpyrrolidine 3n:** yield: 30.8 mg (89%); (Flash column chromatography eluent, petroleum ether/ethyl acetate = 5/1); white solid; m.p.: 113.7 – 114.8 °C;  $[\alpha]_D^{20}$  = +56.5 (c 0.31 CH<sub>2</sub>Cl<sub>2</sub>); <sup>1</sup>H NMR (600 MHz, CDCl<sub>3</sub>)  $\delta$  7.67 (d,  $J$  = 8.1 Hz, 2H), 7.26 (d,  $J$  = 8.0 Hz, 2H), 3.87 (dd,  $J$  = 9.7, 3.0 Hz, 1H), 3.82 – 3.78 (m, 1H), 3.45 (t,  $J$  = 9.2 Hz, 1H), 3.10 (q,  $J$  = 10.6 Hz, 2H), 2.37 (s, 3H), 1.81 (dd,  $J$  = 12.8, 7.3 Hz, 1H), 1.64 (dd,  $J$  = 12.9, 8.3 Hz, 1H), 0.98

(s, 3H), 0.46 (s, 3H); <sup>13</sup>C NMR (151 MHz, CDCl<sub>3</sub>)  $\delta$  143.8, 135.3, 129.8, 127.7, 62.0, 60.2, 46.0, 37.6, 37.5, 26.2, 26.0, 21.6; **HRMS (ESI)** calculated for C<sub>14</sub>H<sub>21</sub><sup>79</sup>BrNO<sub>2</sub>S [M+H]<sup>+</sup>: 346.0476, found: 346.0471; **HRMS (ESI)** calculated for C<sub>14</sub>H<sub>21</sub><sup>81</sup>BrNO<sub>2</sub>S [M+H]<sup>+</sup>: 348.0456, found: 348.0465; **Enantiomeric ratio:** 95:5, determined by HPLC (Daicel Chirapak ID, isopropanol / hexanel = 20/80, flow rate = 1.0 mL/min, T = 30 °C,  $\lambda$  = 254 nm):  $t_R$  = 8.90 min (major),  $t_R$  = 10.54 min (minor).

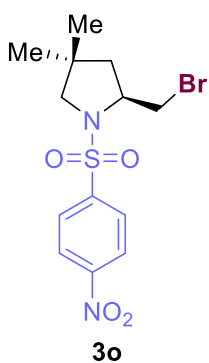

**3o**

**(S)-2-(bromomethyl)-4,4-dimethyl-1-((4-nitrophenyl)sulfonyl)pyrrolidine 3o:** yield: 33.9 mg (90%); (Flash column chromatography eluent, petroleum ether/ethyl acetate = 5/1); white solid; m.p.: 117.9 – 119.0 °C;  $[\alpha]_D^{20}$  = -44.7 (c 0.34 CH<sub>2</sub>Cl<sub>2</sub>); <sup>1</sup>H NMR (600 MHz, CDCl<sub>3</sub>)  $\delta$  8.39 (d,  $J$  = 8.7 Hz, 2H), 8.06 (d,  $J$  = 8.7 Hz, 2H), 4.03 – 3.99 (m, 1H), 3.80 (dd,  $J$  = 10.1, 2.4 Hz, 1H), 3.62 (dd,  $J$  = 10.0, 7.7 Hz, 1H), 3.24 (d,  $J$  = 10.4 Hz, 1H), 3.19 (d,  $J$  = 10.4 Hz, 1H), 1.91 (dd,  $J$  = 12.9,

7.4 Hz, 1H), 1.78 (dd,  $J$  = 12.9, 8.6 Hz, 1H), 1.09 (s, 3H), 0.65 (s, 3H); <sup>13</sup>C NMR (151 MHz, CDCl<sub>3</sub>)

$\delta$  150.3, 144.6, 128.7, 124.5, 61.9, 60.2, 45.5, 38.0, 37.1, 26.0, 25.7; **HRMS (ESI)** calculated for  $C_{13}H_{17}^{79}BrN_2NaO_4S$   $[M+Na]^+$ : 398.9990, found: 398.9986; **Enantiomeric ratio**: 91.5:8.5, determined by HPLC (Daicel Chirapak ID, isopropanol / hexanel = 30/70, flow rate = 1.0 mL/min, T = 30 °C,  $\lambda$  = 254 nm):  $t_R$  = 8.79 min (major),  $t_R$  = 10.63 min (minor).

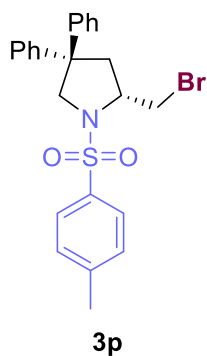

**(R)-2-(bromomethyl)-4,4-diphenyl-1-tosylpyrrolidine 3p**: yield: 39.9 mg (85%); (Flash column chromatography eluent, petroleum ether/ethyl acetate = 5/1); white solid; m.p.: 113.1 – 114.0 °C;  $[\alpha]_D^{20}$  = -17.5 (c 0.40  $CH_2Cl_2$ );  **$^1H$  NMR** (600 MHz,  $CDCl_3$ )  $\delta$  7.62 (d,  $J$  = 8.0 Hz, 2H), 7.30 – 7.26 (m, 4H), 7.23 – 7.05 (m, 8H), 4.41 (d,  $J$  = 10.3 Hz, 1H), 3.97 – 3.89 (m, 1H), 3.79 (dd,  $J$  = 9.7, 3.1 Hz, 1H), 3.70 (d,  $J$  = 10.3 Hz, 1H), 2.92 (t,  $J$  = 9.9 Hz, 1H), 2.77 – 2.73 (m, 2H), 2.40 (s, 3H);  **$^{13}C$  NMR** (151 MHz,  $CDCl_3$ )  $\delta$  144.7, 144.6, 143.7, 134.1, 129.9, 128.8, 128.7, 127.5, 126.9, 126.7, 126.6,

126.4, 60.2, 58.9, 52.4, 42.2, 35.9, 21.6; **HRMS (ESI)** calculated for  $C_{24}H_{25}^{79}BrNO_2S$   $[M+H]^+$ : 470.0789, found: 470.0783; **HRMS (ESI)** calculated for  $C_{24}H_{25}^{81}BrNO_2S$   $[M+H]^+$ : 472.0769, found: 472.0773; **Enantiomeric ratio**: 92:8, determined by HPLC (Daicel Chirapak IB, isopropanol / hexanel = 10/90, flow rate = 1.0 mL/min, T = 30 °C,  $\lambda$  = 254 nm):  $t_R$  = 12.09 min (major),  $t_R$  = 9.96 min (minor).

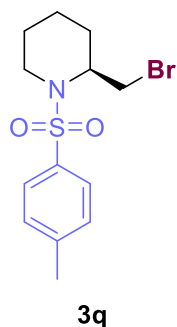

**(S)-2-(bromomethyl)-1-tosylpiperidine 3q**: yield: 28.5 mg (86%); (Flash column chromatography eluent, petroleum ether/ethyl acetate = 5/1); colorless oil;  $[\alpha]_D^{20}$  = +17.2 (c 0.29  $CH_2Cl_2$ );  **$^1H$  NMR** (600 MHz,  $CDCl_3$ )  $\delta$  7.73 (d,  $J$  = 8.1 Hz, 2H), 7.30 (d,  $J$  = 7.9 Hz, 2H), 4.31 – 4.23 (m, 1H), 3.75 (d,  $J$  = 13.3 Hz, 1H), 3.51 (t,  $J$  = 10.1 Hz, 1H), 3.44 – 3.40 (m, 1H), 2.99 – 2.90 (m, 1H), 2.43 (s, 3H), 2.03 (d,  $J$  = 12.4 Hz, 1H), 1.58 – 1.51 (m, 2H), 1.50 – 1.40 (m, 2H), 1.36 – 1.29 (m, 1H);  **$^{13}C$  NMR** (151

MHz,  $CDCl_3$ )  $\delta$  143.4, 138.2, 129.9, 127.1, 53.5, 41.2, 30.4, 25.3, 24.4, 21.6, 18.0; **HRMS (ESI)** calculated for  $C_{13}H_{19}^{79}BrNO_2S$   $[M+H]^+$ : 332.0320, found: 332.0322; **HRMS (ESI)** calculated for  $C_{13}H_{19}^{81}BrNO_2S$   $[M+H]^+$ : 334.0299, found: 334.0307; **Enantiomeric ratio**: 87:13, determined by HPLC (Daicel Chirapak IA, isopropanol / hexanel = 20/80, flow rate = 1.0 mL/min, T = 30 °C,  $\lambda$  = 254 nm):  $t_R$  = 6.42 min (major),  $t_R$  = 7.08 min (minor).

**(S)-5-(bromomethyl)-3-phenyl-1-tosyl-4,5-dihydro-1H-pyrazole 3r**: yield: 35.7 mg (91%); (Flash column chromatography eluent, petroleum ether/ethyl acetate = 5/1); white solid; m.p.: 140.2 –

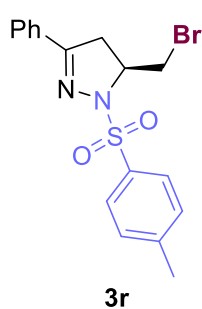

141.1 °C;  $[\alpha]_D^{20} = -74.2$  (c 0.36 CH<sub>2</sub>Cl<sub>2</sub>); <sup>1</sup>H-NMR (600 MHz, CDCl<sub>3</sub>) δ 7.80 (d, *J* = 8.1 Hz, 2H), 7.66 (d, *J* = 7.1 Hz, 2H), 7.43 – 7.37 (m, 3H), 7.29 (d, *J* = 8.0 Hz, 2H), 4.20 – 4.14 (m, 1H), 4.00 (dd, *J* = 10.1, 3.1 Hz, 1H), 3.61 (t, *J* = 9.6 Hz, 1H), 3.28 (dd, *J* = 17.5, 10.9 Hz, 1H), 3.12 (dd, *J* = 17.5, 8.7 Hz, 1H), 2.39 (s, 3H); <sup>13</sup>C-NMR (151 MHz, CDCl<sub>3</sub>) δ 157.3, 144.7, 132.1, 130.9, 130.5, 129.7, 128.7, 128.7, 127.0, 61.9, 39.9, 35.2, 21.7; **HRMS (ESI)** calculated for C<sub>17</sub>H<sub>18</sub><sup>79</sup>BrN<sub>2</sub>O<sub>2</sub>S [M+H]<sup>+</sup>: 393.0272, found: 393.0274; **HRMS (ESI)** calculated for C<sub>17</sub>H<sub>18</sub><sup>81</sup>BrN<sub>2</sub>O<sub>2</sub>S [M+H]<sup>+</sup>: 395.0252, found: 395.0256; **Enantiomeric ratio**: 95:5, determined by HPLC (Daicel Chirapak IA, isopropanol / hexanel = 30/70, flow rate = 1.0 mL/min, T = 30 °C, λ = 254 nm): t<sub>R</sub> = 7.71 min (major), t<sub>R</sub> = 9.19 min (minor).

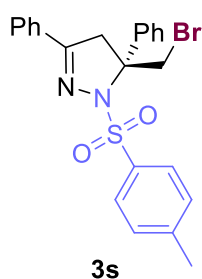

**(R)-5-(bromomethyl)-3,5-diphenyl-1-tosyl-4,5-dihydro-1H-pyrazole 3s**: yield: 38.4 mg (82%); (Flash column chromatography eluent, petroleum ether/ethyl acetate = 5/1); colorless oil;  $[\alpha]_D^{20} = +100.7$  (c 0.38 CH<sub>2</sub>Cl<sub>2</sub>); <sup>1</sup>H-NMR (600 MHz, CDCl<sub>3</sub>) δ 7.76 (s, 2H), 7.44 (s, 3H), 7.25 – 7.22 (m, 3H), 7.14 – 7.11 (m, 4H), 7.00 – 6.97 (s, 2H), 4.66 (dd, *J* = 10.6, 4.2 Hz, 1H), 4.30 (dd, *J* = 10.6, 4.2 Hz, 1H), 3.90 (dd, *J* = 17.8, 4.2 Hz, 1H), 3.67 (dd, *J* = 17.8, 4.1 Hz, 1H), 2.31 (s, 3H); <sup>13</sup>C-NMR (151 MHz, CDCl<sub>3</sub>) δ 152.6, 143.0, 138.0, 136.1, 130.7, 130.5, 128.9, 128.8, 128.4, 128.3, 127.3, 127.0, 126.8, 73.8, 50.8, 38.0, 21.5; **HRMS (ESI)** calculated for C<sub>23</sub>H<sub>22</sub><sup>79</sup>BrN<sub>2</sub>O<sub>2</sub>S [M+H]<sup>+</sup>: 469.0580, found: 469.0585; **HRMS (ESI)** calculated for C<sub>23</sub>H<sub>22</sub><sup>81</sup>BrN<sub>2</sub>O<sub>2</sub>S [M+H]<sup>+</sup>: 471.0560, found: 471.0569; **Enantiomeric ratio**: 89:11, determined by HPLC (Daicel Chirapak IE, isopropanol / hexanel = 30/70, flow rate = 1.0 mL/min, T = 30 °C, λ = 254 nm): t<sub>R</sub> = 24.32 min (major), t<sub>R</sub> = 21.84 min (minor).

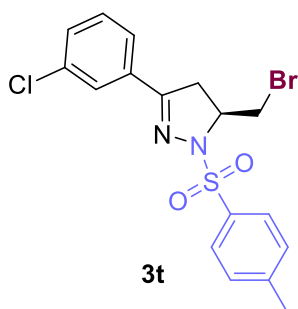

**(S)-5-(bromomethyl)-3-(3-chlorophenyl)-1-tosyl-4,5-dihydro-1H-pyrazole 3t**: yield: 34.6 mg (81%); (Flash column chromatography eluent, petroleum ether/ethyl acetate = 5/1); white solid; m.p.: 140.4 – 141.3 °C;  $[\alpha]_D^{20} = -11.3$  (c 0.35 CH<sub>2</sub>Cl<sub>2</sub>); <sup>1</sup>H-NMR (600 MHz, CDCl<sub>3</sub>) δ 7.79 (d, *J* = 7.6 Hz, 2H), 7.64 (s, 1H), 7.52 (d, *J* = 7.1 Hz, 1H), 7.37 (d, *J* = 7.2 Hz, 1H), 7.31 – 7.30 (m, 3H), 4.25 – 4.15 (m, 1H), 3.97 (dd, *J* = 10.0 Hz, 1H), 3.62 (t, *J* = 9.4 Hz, 1H), 3.25 (dd, *J* = 17.3, 11.2 Hz, 1H), 3.10 (dd, *J* = 17.4, 8.6 Hz, 1H), 2.40 (s, 3H); <sup>13</sup>C-NMR (151 MHz, CDCl<sub>3</sub>) δ 155.9, 144.8, 134.9, 132.3, 132.3, 130.8, 130.0, 129.8, 128.7, 127.0, 125.1, 62.0, 39.7, 35.1, 21.7; **HRMS (ESI)** calculated for C<sub>17</sub>H<sub>17</sub><sup>79</sup>Br<sup>35</sup>ClN<sub>2</sub>O<sub>2</sub>S [M+H]<sup>+</sup>: 426.9883, found:

426.9884; **HRMS (ESI)** calculated for  $C_{17}H_{17}^{81}Br^{35}ClN_2O_2S$   $[M+H]^+$ : 428.9862, found: 428.9870; **HRMS (ESI)** calculated for  $C_{17}H_{17}^{81}Br^{37}ClN_2O_2S$   $[M+H]^+$ : 430.9833, found: 430.9834; **Enantiomeric ratio**: 95.5:4.5, determined by HPLC (Daicel Chirapak IA, isopropanol / hexanel = 30/70, flow rate = 1.0 mL/min,  $T = 30\text{ }^\circ\text{C}$ ,  $\lambda = 254\text{ nm}$ ):  $t_R = 8.38\text{ min}$  (major),  $t_R = 9.58\text{ min}$  (minor).

**(S)-5-(bromomethyl)-3-(2,4-dichlorophenyl)-1-tosyl-4,5-dihydro-1H-pyrazole 3u**: yield: 37.4

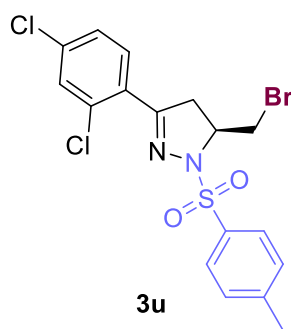

mg (81%); (Flash column chromatography eluent, petroleum ether/ethyl acetate = 5/1); white solid; m.p.:  $155.0 - 156.2\text{ }^\circ\text{C}$ ;  $[\alpha]_D^{20} = +24.3$  (c 0.37  $CH_2Cl_2$ );  $^1H$ -NMR (600 MHz,  $CDCl_3$ )  $\delta$  7.81 (d,  $J = 7.1\text{ Hz}$ , 2H), 7.57 (d,  $J = 8.1\text{ Hz}$ , 1H), 7.38 (s, 1H), 7.34 (d,  $J = 7.0\text{ Hz}$ , 2H), 7.26 (s, 1H), 4.21 – 4.20 (m, 1H), 3.96 (dd,  $J = 9.7\text{ Hz}$ , 1H), 3.66 (t,  $J = 9.1\text{ Hz}$ , 1H), 3.42 (dd,  $J = 17.5, 11.0\text{ Hz}$ , 1H), 3.29 (dd,  $J = 17.7, 8.8\text{ Hz}$ , 1H), 2.43 (s, 3H);  $^{13}C$ -NMR

(151 MHz,  $CDCl_3$ )  $\delta$  156.1, 144.9, 136.8, 133.6, 132.3, 131.5, 130.6, 129.8, 128.7, 128.6, 127.5, 62.4, 42.6, 35.0, 21.7; **HRMS (ESI)** calculated for  $C_{17}H_{16}^{79}Br^{35}Cl_2N_2O_2S$   $[M+H]^+$ : 460.9493, found: 460.9497; **Enantiomeric ratio**: 95.5:4.5, determined by HPLC (Daicel Chirapak IA, isopropanol / hexanel = 20/80, flow rate = 1.0 mL/min,  $T = 30\text{ }^\circ\text{C}$ ,  $\lambda = 254\text{ nm}$ ):  $t_R = 8.90\text{ min}$  (major),  $t_R = 11.79\text{ min}$  (minor).

**(S)-5-(bromomethyl)-3-(4-fluorophenyl)-1-tosyl-4,5-dihydro-1H-pyrazole 3v**: yield: 37.4 mg

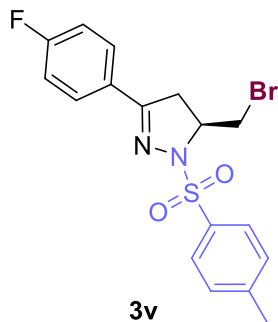

(91%); (Flash column chromatography eluent, petroleum ether/ethyl acetate = 5/1); white solid; m.p.:  $120.1 - 121.3\text{ }^\circ\text{C}$ ;  $[\alpha]_D^{20} = -100.1$  (c 0.37  $CH_2Cl_2$ );  $^1H$ -NMR (600 MHz,  $CDCl_3$ )  $\delta$  7.80 (d,  $J = 7.9\text{ Hz}$ , 2H), 7.68 – 7.62 (m, 2H), 7.30 (d,  $J = 7.9\text{ Hz}$ , 2H), 7.07 (t,  $J = 8.3\text{ Hz}$ , 2H), 4.21 – 4.16 (m, 1H), 4.02 – 3.97 (m, 1H), 3.62 (t,  $J = 9.6\text{ Hz}$ , 1H), 3.26 (dd,  $J = 17.4, 10.9\text{ Hz}$ , 1H), 3.11 (dd,  $J = 17.4, 8.7\text{ Hz}$ , 1H), 2.40 (s, 3H);  $^{13}C$ -NMR (151 MHz,  $CDCl_3$ )  $\delta$  165.2, 163.5,

156.2, 144.7, 132.1, 129.8, 129.1 (d,  $J = 8.6\text{ Hz}$ ), 128.7, 126.8 (d,  $J = 3.5\text{ Hz}$ ), 115.9 (d,  $J = 22.0\text{ Hz}$ ), 62.0, 39.9, 35.2, 21.7;  $^{19}F$ -NMR (564 MHz,  $CDCl_3$ )  $\delta$  -108.6; **HRMS (ESI)** calculated for  $C_{17}H_{17}^{79}BrFN_2O_2S$   $[M+H]^+$ : 411.0173, found: 411.0179; **HRMS (ESI)** calculated for  $C_{17}H_{17}^{81}BrFN_2O_2S$   $[M+H]^+$ : 413.0152, found: 413.0159; **Enantiomeric ratio**: 95:5, determined by HPLC (Daicel Chirapak IA, isopropanol / hexanel = 30/70, flow rate = 1.0 mL/min,  $T = 30\text{ }^\circ\text{C}$ ,  $\lambda = 254\text{ nm}$ ):  $t_R = 9.42\text{ min}$  (major),  $t_R = 11.57\text{ min}$  (minor).

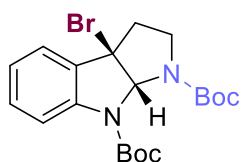

**3w**

**di-tert-butyl (3aR,8aR)-3a-bromo-2,3,3a,8a-tetrahydropyrrolo[2,3-**  
**b]indole-1,8-dicarboxylate 3w:** yield: 39.5 mg (90%); (Flash column  
 chromatography eluent, petroleum ether/ethyl acetate = 5/1); white solid; m.p.:

89.6 – 91.1 °C;  $[\alpha]_D^{20} = -75.7$  (c 0.40 CH<sub>2</sub>Cl<sub>2</sub>); <sup>1</sup>H NMR (600 MHz, CDCl<sub>3</sub>) δ 7.58 (s, 1H), 7.36 (d, *J* = 7.6 Hz, 1H), 7.32 – 7.27 (m, 1H), 7.09 (t, *J* = 7.5 Hz, 1H), 6.44 (s, 1H), 3.73 (dd, *J* = 10.4, 7.7 Hz, 1H), 2.81 – 2.79 (m, 2H), 2.76 – 2.68 (m, 1H), 1.59 (s, 9H), 1.49 (s, 9H); <sup>13</sup>C-NMR (101 MHz, CDCl<sub>3</sub>) δ 153.4, 152.1, 142.1, 132.7, 130.3, 124.0, 123.8, 117.4, 83.9, 82.1, 80.8, 62.2, 46.2, 28.4, 28.3; **HRMS (ESI)** calculated for C<sub>20</sub>H<sub>27</sub><sup>79</sup>BrN<sub>2</sub>NaO<sub>4</sub> [M+Na]<sup>+</sup>: 461.1052, found: 461.1048; **Enantiomeric ratio:** 90:10, determined by HPLC (Daicel Chirapak IC, isopropanol / hexanel = 30/70, flow rate = 1.0 mL/min, T = 30 °C, λ = 254 nm): t<sub>R</sub> = 4.23 min (major), t<sub>R</sub> = 4.69 min (minor).

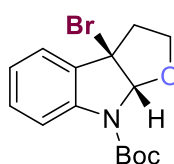

**3x**

**tert-butyl (3aR,8aS)-3a-bromo-2,3,3a,8a-tetrahydro-8H-furo[2,3-b]indole-8-**  
**carboxylate 3x:** yield: 30.6 mg (90%); (Flash column chromatography eluent,  
 petroleum ether/ethyl acetate = 7/1); colorless oil;  $[\alpha]_D^{20} = -64.2$  (c 0.31 CH<sub>2</sub>Cl<sub>2</sub>); <sup>1</sup>H-

NMR (600 MHz, CDCl<sub>3</sub>) δ 7.84 (s, 1H), 7.41 (d, *J* = 7.5 Hz, 1H), 7.28 (t, *J* = 7.8 Hz, 1H), 7.08 (t, *J* = 7.5 Hz, 1H), 6.34 – 6.12 (m, 1H), 4.00 (t, *J* = 8.0 Hz, 1H), 3.53 – 3.45 (m, 1H), 2.94 – 2.86 (m, 1H), 2.80 (dd, *J* = 12.3, 3.8 Hz, 1H), 1.60 (s, 9H); <sup>13</sup>C-NMR (151 MHz, CDCl<sub>3</sub>) δ 151.9, 141.6, 132.0, 130.5, 124.9, 123.8, 115.0, 100.9, 81.2, 67.8, 61.6, 45.1, 28.5; **Enantiomeric ratio:** 96.5:3.5, determined by HPLC (Daicel Chirapak IC, isopropanol / hexanel = 5/95, flow rate = 1.0 mL/min, T = 30 °C, λ = 254 nm): t<sub>R</sub> = 6.22 min (major), t<sub>R</sub> = 5.20 min (minor).

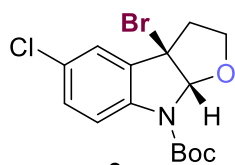

**3y**

**tert-butyl (3aR,8aS)-3a-bromo-5-chloro-2,3,3a,8a-tetrahydro-8H-furo[2,3-**  
**b]indole-8-carboxylate 3y:** yield: 33.7 mg (90%); (Flash column  
 chromatography eluent, petroleum ether/ethyl acetate = 5/1); colorless oil;  $[\alpha]_D^{20}$

= -39.9 (c 0.34 CH<sub>2</sub>Cl<sub>2</sub>); <sup>1</sup>H NMR (600 MHz, CDCl<sub>3</sub>) δ 7.78 (s, 1H), 7.36 (d, *J* = 1.9 Hz, 1H), 7.26 – 7.24 (m, 1H), 6.19 – 6.15 (m, 1H), 4.01 (t, *J* = 8.0 Hz, 1H), 3.52 – 3.49 (m, 1H), 2.90 – 2.86 (m, 1H), 2.76 (dd, *J* = 12.5, 3.7 Hz, 1H), 1.59 (s, 9H); <sup>13</sup>C-NMR (151 MHz, CDCl<sub>3</sub>) δ 151.7, 130.6, 128.7, 125.0, 116.1, 110.1, 101.2, 82.8, 67.8, 60.7, 45.0, 28.4; **Enantiomeric ratio:** 94:6, determined by HPLC (Daicel Chirapak IC, isopropanol / hexanel = 5/95, flow rate = 1.0 mL/min, T = 30 °C, λ = 254 nm): t<sub>R</sub> = 6.05 min (major), t<sub>R</sub> = 5.44 min (minor).

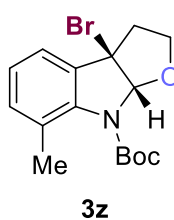

*tert*-butyl (3*aR*,8*aS*)-3*a*-bromo-7-methyl-2,3,3*a*,8*a*-tetrahydro-8*H*-furo[2,3-

*b*]indole-8-carboxylate **3z**: yield: 31.8 mg (90%); (Flash column chromatography

eluent, petroleum ether/ethyl acetate = 7/1); colorless oil;  $[\alpha]_D^{20} = -109.3$  (c 0.32

$\text{CH}_2\text{Cl}_2$ );  $^1\text{H-NMR}$  (600 MHz,  $\text{CDCl}_3$ )  $\delta$  7.25 (d,  $J = 7.2$  Hz, 1H), 7.16 – 7.08 (m,

2H), 6.18 (s, 1H), 3.98 – 3.94 (m, 1H), 3.44 – 3.40 (m, 1H), 2.90 – 2.84 (m, 1H), 2.81

– 2.76 (m, 1H), 2.32 (s, 3H), 1.57 (s, 9H);  $^{13}\text{C-NMR}$  (151 MHz,  $\text{CDCl}_3$ )  $\delta$  152.6, 140.6, 134.6, 133.0,

128.5, 125.7, 121.6, 103.0, 82.3, 68.0, 61.7, 43.6, 28.3, 20.2; **Enantiomeric ratio**: 96.5:3.5,

determined by HPLC (Daicel Chirapak IC, isopropanol / hexanel = 5/95, flow rate = 1.0 mL/min, T

= 30 °C,  $\lambda = 254$  nm):  $t_R = 6.85$  min (major),  $t_R = 6.02$  min (minor).

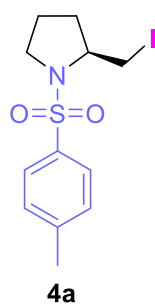

(*S*)-2-(iodomethyl)-1-tosylpyrrolidine **4a**: yield: 31.7 mg (87%); (Flash column

chromatography eluent, petroleum ether/ethyl acetate = 5/1); colorless oil;  $[\alpha]_D^{20} = -$

80.0 (c 0.32  $\text{CH}_2\text{Cl}_2$ );  $^1\text{H NMR}$  (600 MHz,  $\text{CDCl}_3$ )  $\delta$  7.73 (d,  $J = 8.2$  Hz, 2H), 7.34 (d,

$J = 7.9$  Hz, 2H), 3.74 (m, 1H), 3.62 (dd,  $J = 9.6, 2.9$  Hz, 1H), 3.52 – 3.44 (m, 1H), 3.22

– 3.18 (m, 2H), 2.44 (s, 3H), 1.86 – 1.82 (m, 3H), 1.53 – 1.51 (m, 1H);  $^{13}\text{C NMR}$  (151

MHz,  $\text{CDCl}_3$ )  $\delta$  143.8, 134.6, 129.9, 127.6, 60.8, 50.2, 32.2, 24.0, 21.6, 11.6; **HRMS**

(**ESI**) calculated for  $\text{C}_{12}\text{H}_{17}\text{INO}_2\text{S}$   $[\text{M}+\text{H}]^+$ : 366.0025, found: 366.0032; **Enantiomeric ratio**:

92.5:7.5, determined by HPLC (Daicel Chirapak IA, isopropanol / hexanel = 20/80, flow rate = 1.0

mL/min, T = 30 °C,  $\lambda = 254$  nm):  $t_R = 6.32$  min (major),  $t_R = 6.74$  min (minor).

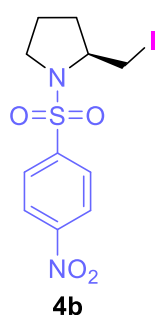

(*S*)-2-(iodomethyl)-1-((4-nitrophenyl)sulfonyl)pyrrolidine **4b**: yield: 29.7 mg (75%);

(Flash column chromatography eluent, petroleum ether/ethyl acetate = 5/1); white solid;

m.p.: 101.2 – 102.5 °C;  $[\alpha]_D^{20} = +20.3$  (c 0.30  $\text{CH}_2\text{Cl}_2$ );  $^1\text{H NMR}$  (600 MHz,  $\text{CDCl}_3$ )

$\delta$  8.40 (d,  $J = 8.8$  Hz, 2H), 8.05 (d,  $J = 8.9$  Hz, 2H), 3.83 – 3.76 (m, 1H), 3.59 (d,  $J =$

9.8 Hz, 1H), 3.57 – 3.50 (m, 1H), 3.27 – 3.22 (m, 2H), 1.99 – 1.90 (m, 2H), 1.90 – 1.81

(m, 1H), 1.65 – 1.60 (m, 1H);  $^{13}\text{C NMR}$  (151 MHz,  $\text{CDCl}_3$ )  $\delta$  150.4, 143.5, 128.7,

124.6, 61.1, 50.2, 32.2, 24.1, 10.7; **HRMS (ESI)** calculated for  $\text{C}_{11}\text{H}_{14}\text{IN}_2\text{O}_4\text{S}$   $[\text{M}+\text{H}]^+$ : 396.9719,

found: 396.9717; **Enantiomeric ratio**: 90.5:9.5, determined by HPLC (Daicel Chirapak IC,

isopropanol / hexanel = 30/70, flow rate = 1.0 mL/min, T = 30 °C,  $\lambda = 254$  nm):  $t_R = 18.05$  min (major),

$t_R = 16.16$  min (minor).

(*S*)-2-(iodomethyl)-1-((3-nitrophenyl)sulfonyl)pyrrolidine **4c**: yield: 30.1 mg (76%); (Flash

column chromatography eluent, petroleum ether/ethyl acetate = 5/1); white solid; m.p.: 108.2 –

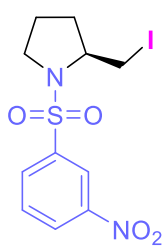

**4c**

109.4 °C;  $[\alpha]_D^{20} = +63.3$  (c 0.30 CH<sub>2</sub>Cl<sub>2</sub>); <sup>1</sup>H NMR (600 MHz, CDCl<sub>3</sub>) δ 8.68 (d, *J* = 10.6 Hz, 1H), 8.45 (t, *J* = 9.8 Hz, 1H), 8.18 (d, *J* = 7.7 Hz, 1H), 7.77 (dd, *J* = 15.1, 7.1 Hz, 1H), 3.81 – 3.78 (m, 1H), 3.60 – 3.54 (m, 1H), 3.56 – 3.49 (m, 1H), 3.33 – 3.22 (m, 2H), 1.98 – 1.90 (m, 2H), 1.90 – 1.81 (m, 1H), 1.68 – 1.60 (m, 1H); <sup>13</sup>C NMR (151 MHz, CDCl<sub>3</sub>) δ 148.6, 140.1, 132.9, 130.7, 127.4, 122.6, 60.9, 50.2, 32.2, 24.1,

10.9; **HRMS (ESI)** calculated for C<sub>11</sub>H<sub>14</sub>IN<sub>2</sub>O<sub>4</sub>S [M+H]<sup>+</sup>: 396.9717, found: 396.9725; **Enantiomeric ratio**: 91:9, determined by HPLC (Daicel Chirapak IB, isopropanol / hexanel = 10/90, flow rate = 1.0 mL/min, T = 30 °C, λ = 254 nm): t<sub>R</sub> = 17.55 min (major), t<sub>R</sub> = 16.60 min (minor).

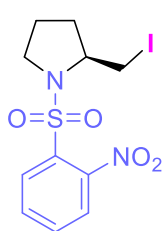

**4d**

**(S)-2-(iodomethyl)-1-((2-nitrophenyl)sulfonyl)pyrrolidine 4d**: yield: 30.9 mg (78%); (Flash column chromatography eluent, petroleum ether/ethyl acetate = 5/1); white solid; m.p.: 105.8 – 107.0 °C;  $[\alpha]_D^{20} = +29.7$  (c 0.31 CH<sub>2</sub>Cl<sub>2</sub>); <sup>1</sup>H NMR (600 MHz, CDCl<sub>3</sub>) δ 8.05 (t, *J* = 10.0 Hz, 1H), 7.72 (t, *J* = 7.4 Hz, 2H), 7.62 (d, *J* = 7.1 Hz, 1H), 4.11 (s, 1H), 3.59 – 3.44 (m, 3H), 3.24 (t, *J* = 9.6 Hz, 1H), 2.08 (d, *J* = 7.6 Hz,

1H), 1.99 (d, *J* = 11.1 Hz, 2H), 1.86 – 1.79 (m, 1H); <sup>13</sup>C NMR (151 MHz, CDCl<sub>3</sub>) δ 148.7, 133.9, 132.0, 131.6, 131.0, 124.2, 60.8, 50.1, 32.4, 24.1, 10.5; **HRMS (ESI)** calculated for C<sub>11</sub>H<sub>14</sub>IN<sub>2</sub>O<sub>4</sub>S [M+H]<sup>+</sup>: 396.9719, found: 396.9726; **Enantiomeric ratio**: 90:10, determined by HPLC (Daicel Chirapak IC, isopropanol / hexanel = 30/70, flow rate = 1.0 mL/min, T = 30 °C, λ = 254 nm): t<sub>R</sub> = 17.67 min (major), t<sub>R</sub> = 19.86 min (minor).

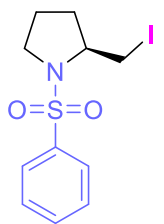

**4e**

**(S)-2-(iodomethyl)-1-(phenylsulfonyl)pyrrolidine 4e**: yield: 28.8 mg (82%); (Flash column chromatography eluent, petroleum ether/ethyl acetate = 5/1); colorless oil;  $[\alpha]_D^{20} = -72.8$  (c 0.29 CH<sub>2</sub>Cl<sub>2</sub>); <sup>1</sup>H NMR (600 MHz, CDCl<sub>3</sub>) δ 7.84 (d, *J* = 7.4 Hz, 2H), 7.61 (d, *J* = 6.5 Hz, 1H), 7.54 (t, *J* = 6.8 Hz, 2H), 3.80 – 3.72 (m, 1H), 3.65 – 3.58 (m, 1H), 3.51 – 3.47 (m, 1H), 3.26 – 3.17 (m, 2H), 1.92 – 1.76 (m, 3H), 1.57 – 1.48 (m,

1H); <sup>13</sup>C NMR (151 MHz, CDCl<sub>3</sub>) δ 137.5, 133.0, 129.3, 127.5, 60.8, 50.1, 32.1, 24.0, 11.4; **HRMS (ESI)** calculated for C<sub>11</sub>H<sub>15</sub>INO<sub>2</sub>S [M+H]<sup>+</sup>: 351.9868, found: 351.9869; **Enantiomeric ratio**: 91:9, determined by HPLC (Daicel Chirapak IA, isopropanol / hexanel = 10/90, flow rate = 1.0 mL/min, T = 30 °C, λ = 254 nm): t<sub>R</sub> = 8.32 min (major), t<sub>R</sub> = 8.94 min (minor).

**(S)-2-(iodomethyl)-4,4-dimethyl-1-tosylpyrrolidine 4f**: yield: 34.6 mg (88%); (Flash column chromatography eluent, petroleum ether/ethyl acetate = 5/1); white solid; m.p.: 115.0 – 116.2 °C;  $[\alpha]_D^{20} = +7.0$  (c 0.35 CH<sub>2</sub>Cl<sub>2</sub>); <sup>1</sup>H NMR (600 MHz, CDCl<sub>3</sub>) δ 7.72 (d, *J* = 8.2 Hz, 2H), 7.31 (d, *J* =

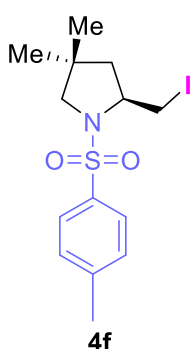

7.9 Hz, 2H), 3.75 (dd,  $J = 9.5, 2.7$  Hz, 1H), 3.71 – 3.65 (m, 1H), 3.36 (t,  $J = 9.2$  Hz, 1H), 3.26 – 3.12 (m, 2H), 2.42 (s, 3H), 1.90 (dd,  $J = 12.5, 7.2$  Hz, 1H), 1.58 (dd,  $J = 12.8, 8.6$  Hz, 1H), 1.03 (s, 3H), 0.50 (s, 3H);  $^{13}\text{C NMR}$  (151 MHz,  $\text{CDCl}_3$ )  $\delta$  143.7, 135.3, 129.8, 127.6, 62.1, 60.2, 47.9, 37.6, 26.1, 26.0, 21.6, 13.2; **HRMS (ESI)** calculated for  $\text{C}_{14}\text{H}_{21}\text{INO}_2\text{S}$   $[\text{M}+\text{H}]^+$ : 394.0338, found: 394.0341; **Enantiomeric ratio**: 90.5:9.5, determined by HPLC (Daicel Chirapak IB, isopropanol / hexanel = 5/95, flow rate = 1.0 mL/min,  $T = 30^\circ\text{C}$ ,  $\lambda = 254$  nm):  $t_{\text{R}} =$

7.25 min (major),  $t_{\text{R}} = 7.88$  min (minor).

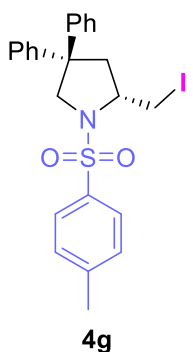

**(R)-2-(iodomethyl)-4,4-diphenyl-1-tosylpyrrolidine 4g**: yield: 46.3 mg (89%); (Flash column chromatography eluent, petroleum ether/ethyl acetate = 5/1); white solid; m.p.: 113.7 – 114.5  $^\circ\text{C}$ ;  $[\alpha]_{\text{D}}^{20} = -16.9$  (c 0.46  $\text{CH}_2\text{Cl}_2$ );  $^1\text{H NMR}$  (600 MHz,  $\text{CDCl}_3$ )  $\delta$  7.59 (d,  $J = 8.2$  Hz, 2H), 7.30 – 7.25 (m, 4H), 7.18 (t,  $J = 7.7$  Hz, 3H), 7.16 – 7.05 (m, 5H), 4.43 (d,  $J = 10.3$  Hz, 1H), 3.90 – 3.83 (m, 1H), 3.76 (d,  $J = 10.3$  Hz, 1H), 3.67 (dd,  $J = 9.5, 3.1$  Hz, 1H), 2.82 (m, 2H), 2.66 (dd,  $J = 13.1, 5.2$

Hz, 1H), 2.39 (s, 3H);  $^{13}\text{C NMR}$  (151 MHz,  $\text{CDCl}_3$ )  $\delta$  144.8, 144.5, 143.7, 134.4, 129.8, 128.8, 128.7, 127.5, 126.9, 126.7, 126.6, 126.4, 60.5, 59.3, 52.4, 44.1, 21.6, 11.4; **HRMS (ESI)** calculated for  $\text{C}_{24}\text{H}_{25}\text{INO}_2\text{S}$   $[\text{M}+\text{H}]^+$ : 518.0651, found: 518.0641; **Enantiomeric ratio**: 91:9, determined by HPLC (Daicel Chirapak IB, isopropanol / hexanel = 20/80, flow rate = 1.0 mL/min,  $T = 30^\circ\text{C}$ ,  $\lambda = 254$  nm):  $t_{\text{R}} = 7.45$  min (major),  $t_{\text{R}} = 6.31$  min (minor).

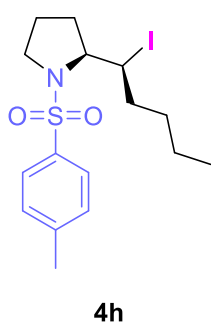

**(S)-2-((S)-1-iodopentyl)-1-tosylpyrrolidine 4h**: yield: 36.6 mg (87%); (Flash column chromatography eluent, petroleum ether/ethyl acetate = 5/1); colorless oil;  $[\alpha]_{\text{D}}^{20} = -46.8$  (c 0.37  $\text{CH}_2\text{Cl}_2$ );  $^1\text{H NMR}$  (600 MHz,  $\text{CDCl}_3$ )  $\delta$  7.64 (d,  $J = 7.9$  Hz, 2H), 7.27 (d,  $J = 7.9$  Hz, 2H), 4.53 (d,  $J = 11.5$  Hz, 1H), 4.02 – 3.93 (m, 1H), 3.47 – 3.37 (m, 1H), 3.32 – 3.27 (m, 1H), 2.37 (s, 3H), 1.98 – 1.93 (m, 1H), 1.86 – 1.82 (m, 1H), 1.75 – 1.65 (m, 2H), 1.57 – 1.49 (m, 2H), 1.38 – 1.30 (m, 2H), 1.25 (dd,

$J = 13.2, 6.4$  Hz, 2H), 0.86 (t,  $J = 6.9$  Hz, 3H);  $^{13}\text{C NMR}$  (151 MHz,  $\text{CDCl}_3$ )  $\delta$  143.8, 134.2, 129.9, 127.7, 65.9, 51.6, 41.1, 32.3, 32.0, 29.2, 24.4, 22.0, 21.6, 14.0; **HRMS (ESI)** calculated for  $\text{C}_{16}\text{H}_{25}\text{INO}_2\text{S}$   $[\text{M}+\text{H}]^+$ : 422.0651, found: 422.0661; **Enantiomeric ratio**: 92:8, determined by HPLC (Daicel Chirapak IC, isopropanol / hexanel = 30/70, flow rate = 1.0 mL/min,  $T = 30^\circ\text{C}$ ,  $\lambda = 254$  nm):  $t_{\text{R}} = 7.39$  min (major),  $t_{\text{R}} = 6.78$  min (minor).



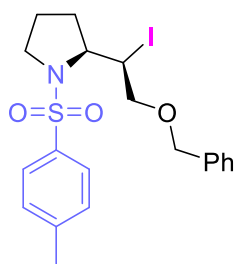

**4i**

**(S)-2-((R)-2-(benzyloxy)-1-iodoethyl)-1-tosylpyrrolidine 4i:** yield: 42.2 mg (87%); (Flash column chromatography eluent, petroleum ether/ethyl acetate = 5/1); colorless oil;  $[\alpha]_D^{20} = +56.4$  (c 0.42 CH<sub>2</sub>Cl<sub>2</sub>); <sup>1</sup>H NMR (600 MHz, CDCl<sub>3</sub>) δ 7.71 (d, *J* = 7.2 Hz, 2H), 7.42 – 7.33 (m, 4H), 7.30 (dd, *J* = 15.1, 7.4 Hz, 3H), 4.70 (dd, *J* = 11.2, 5.6 Hz, 1H), 4.64 (d, *J* = 11.8 Hz, 1H), 4.58 (d, *J* = 11.8 Hz, 1H), 3.99 (dd, *J* = 8.5, 3.9 Hz, 1H), 3.86 (d, *J* = 5.9 Hz, 2H), 3.47 – 3.39 (m, 1H), 3.36 – 3.28 (m, 1H), 2.43 (s, 3H), 2.08 – 2.03 (m, 1H), 1.86 – 1.80 (m, 1H), 1.75 – 1.72 (m, 1H), 1.34 – 1.30 (m, 1H); <sup>13</sup>C NMR (151 MHz, CDCl<sub>3</sub>) δ 143.9, 138.1, 134.3, 129.9, 128.5, 127.9, 127.8, 127.8, 73.1, 71.4, 63.4, 51.3, 35.8, 30.4, 24.3, 21.6; **HRMS (ESI)** calculated for C<sub>20</sub>H<sub>25</sub>INO<sub>3</sub>S [M+H]<sup>+</sup>: 486.0600, found: 486.0594; **Enantiomeric ratio:** 91:9, determined by HPLC (Daicel Chirapak IC, isopropanol / hexanel = 10/90, flow rate = 1.0 mL/min, T = 30 °C, λ = 254 nm): t<sub>R</sub> = 10.90 min (major), t<sub>R</sub> = 9.57 min (minor).

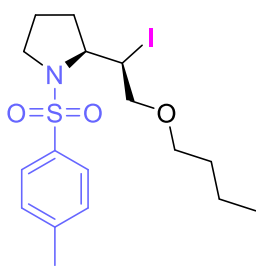

**4j**

**(S)-2-((R)-2-butoxy-1-iodoethyl)-1-tosylpyrrolidine 4j:** yield: 38.3 mg (85%); (Flash column chromatography eluent, petroleum ether/ethyl acetate = 5/1); colorless oil;  $[\alpha]_D^{20} = +64.5$  (c 0.38 CH<sub>2</sub>Cl<sub>2</sub>); <sup>1</sup>H NMR (600 MHz, CDCl<sub>3</sub>) δ 7.72 (d, *J* = 7.7 Hz, 2H), 7.34 (d, *J* = 7.6 Hz, 2H), 4.68 (d, *J* = 3.6 Hz, 1H), 4.02 – 3.93 (m, 1H), 3.85 – 3.69 (m, 2H), 3.59 – 3.42 (m, 3H), 3.35 – 3.27 (m, 1H), 2.44 (s, 3H), 2.09 (dd, *J* = 12.2, 6.0 Hz, 1H), 1.89 – 1.71 (m, 2H), 1.60 – 1.56 (m, 2H), 1.46 – 1.32 (m, 3H), 0.93 (t, *J* = 7.2 Hz, 3H). <sup>13</sup>C NMR (151 MHz, CDCl<sub>3</sub>) δ 143.8, 134.3, 129.9, 127.7, 71.7, 71.0, 63.6, 51.3, 36.2, 31.9, 30.2, 24.3, 21.6, 19.5, 14.0; **HRMS (ESI)** calculated for C<sub>17</sub>H<sub>27</sub>INO<sub>3</sub>S [M+H]<sup>+</sup>: 452.0756, found: 452.0761; **Enantiomeric ratio:** 88.5:11.5, determined by HPLC (Daicel Chirapak IC, isopropanol / hexanel = 20/80, flow rate = 1.0 mL/min, T = 30 °C, λ = 254 nm): t<sub>R</sub> = 10.88 min (major), t<sub>R</sub> = 9.04 min (minor).

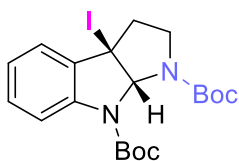

**4k**

**di-tert-butyl (3aR,8aR)-3a-iodo-2,3,3a,8a-tetrahydropyrrolo[2,3-b]indole-1,8-dicarboxylate 4k:** yield: 35.0 mg (72%); (Flash column chromatography eluent, petroleum ether/ethyl acetate = 7/1); colorless oil;  $[\alpha]_D^{20} = -43.6$  (c 0.35 CH<sub>2</sub>Cl<sub>2</sub>); <sup>1</sup>H-NMR (600 MHz, CDCl<sub>3</sub>) δ 7.44 (s, 1H), 7.28 (d, *J* = 7.4 Hz, 1H), 7.20 – 7.15 (m, 1H), 7.05 – 6.97 (m, 1H), 6.38 (s, 1H), 3.49 – 3.40 (m, 1H), 2.87 – 2.78 (m, 1H), 2.77 – 2.67 (m, 2H), 1.52 (s, 9H), 1.41 (s, 9H); <sup>13</sup>C-NMR (151 MHz, CDCl<sub>3</sub>) δ 153.3, 152.3, 141.2, 130.4, 129.7, 124.3, 123.8, 117.9, 86.3, 82.1, 80.8, 46.1, 37.2, 28.5, 28.4; **HRMS (ESI)** calculated for

$C_{20}H_{27}IN_2NaO_4$   $[M+Na]^+$ : 509.0913, found 509.0916; **Enantiomeric ratio**: 87:13, determined by HPLC (Daicel Chirapak IC, isopropanol / hexanel = 20/80, flow rate = 1.0 mL/min, T = 30 °C,  $\lambda$  = 254 nm):  $t_R$  = 4.69 min (major),  $t_R$  = 5.07 min (minor).

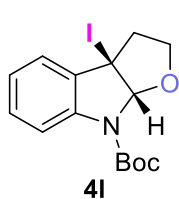

**tert-butyl (3aR,8aS)-3a-iodo-2,3,3a,8a-tetrahydro-8H-furo[2,3-b]indole-8-carboxylate 4l**: yield: 35.2 mg (91%); (Flash column chromatography eluent, petroleum ether/ethyl acetate = 7/1); colorless oil;  $[\alpha]_D^{20}$  = -79.2 (c 0.35  $CH_2Cl_2$ );  $^1H$ -NMR (600 MHz,  $CDCl_3$ )  $\delta$  7.79 (s, 1H), 7.39 (d,  $J$  = 7.2 Hz, 1H), 7.23 (t,  $J$  = 7.0 Hz, 1H), 7.05 (t,  $J$  = 7.4 Hz, 1H), 6.45 – 6.17 (m, 1H), 3.85 – 3.76 (m, 1H), 3.45 – 3.32 (m, 1H), 2.99 – 2.86 (m, 2H), 1.61 (s, 9H);  $^{13}C$ -NMR (151 MHz,  $CDCl_3$ )  $\delta$  151.9, 129.9, 125.2, 123.8, 115.0, 103.3, 82.3, 67.3, 47.9, 28.5; **HRMS (ESI)** calculated for  $C_{15}H_{18}INNaO_3$   $[M+Na]^+$ : 410.0229, found: 410.0223; **Enantiomeric ratio**: 94.5:5.5, determined by HPLC (Daicel Chirapak IC, isopropanol / hexanel = 5/95, flow rate = 1.0 mL/min, T = 30 °C,  $\lambda$  = 254 nm):  $t_R$  = 6.32 min (major),  $t_R$  = 5.37 min (minor).

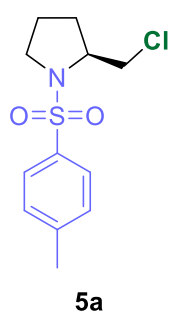

**(S)-2-(chloromethyl)-1-tosylpyrrolidine 5a**: yield: 22.2 mg (81%); (Flash column chromatography eluent, petroleum ether/ethyl acetate = 5/1); colorless oil;  $[\alpha]_D^{20}$  = -41.4 (c 0.22  $CH_2Cl_2$ );  $^1H$  NMR (600 MHz,  $CDCl_3$ )  $\delta$  7.73 (d,  $J$  = 8.0 Hz, 2H), 7.33 (d,  $J$  = 8.0 Hz, 2H), 3.88 (d,  $J$  = 10.7 Hz, 1H), 3.81 (d,  $J$  = 8.5 Hz, 1H), 3.51 – 3.42 (m, 2H), 3.14 (q,  $J$  = 8.1 Hz, 1H), 2.44 (s, 3H), 1.93 (s, 1H), 1.89 – 1.78 (m, 1H), 1.78 – 1.66 (m, 1H), 1.63 – 1.59 (m, 1H);  $^{13}C$  NMR (151 MHz,  $CDCl_3$ )  $\delta$  143.8, 134.3, 129.9, 127.7, 60.6, 49.7, 47.1, 29.4, 23.9, 21.6; **HRMS (ESI)** calculated for  $C_{12}H_{17}ClINO_2S$   $[M+H]^+$ : 274.0669, found: 274.0670; **Enantiomeric ratio**: 83:17, determined by HPLC (Daicel Chirapak IA, isopropanol / hexanel = 20/80, flow rate = 1.0 mL/min, T = 30 °C,  $\lambda$  = 254 nm):  $t_R$  = 10.26 min (major),  $t_R$  = 11.26 min (minor).

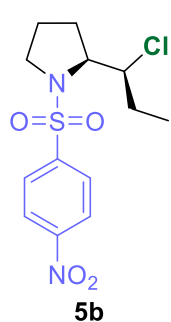

**(S)-2-((S)-1-chloropropyl)-1-((4-nitrophenyl)sulfonyl)pyrrolidine 5b**: yield: 26.9 mg (81%); (Flash column chromatography eluent, petroleum ether/ethyl acetate = 5/1); white solid; m.p.: 113.7 – 114.5 °C;  $[\alpha]_D^{20}$  = +6.9 (c 0.27  $CH_2Cl_2$ );  $^1H$  NMR (600 MHz,  $CDCl_3$ )  $\delta$  8.39 (d,  $J$  = 8.7 Hz, 2H), 8.03 (d,  $J$  = 8.7 Hz, 2H), 4.26 (d,  $J$  = 11.2 Hz, 1H), 3.97 – 3.88 (m, 1H), 3.54 – 3.46 (m, 1H), 3.31 – 3.27 (m, 1H), 2.09 – 1.94 (m, 2H), 1.87 – 1.73 (m, 2H), 1.54 – 1.45 (m, 2H), 1.10 (t,  $J$  = 7.2 Hz, 3H);  $^{13}C$  NMR (151 MHz,  $CDCl_3$ )  $\delta$  150.5, 143.0, 128.9, 124.5, 66.5, 64.4, 50.7, 27.2, 24.8, 24.6, 11.8; **HRMS (ESI)**

calculated for  $C_{13}H_{18}ClN_2O_4S$   $[M+H]^+$ : 333.0676, found: 333.0675; **Enantiomeric ratio**: 84.5:15.5, determined by HPLC (Daicel Chirapak IC, isopropanol / hexanel = 20/80, flow rate = 1.0 mL/min, T = 30 °C,  $\lambda$  = 254 nm):  $t_R$  = 25.60 min (major),  $t_R$  = 20.38 min (minor).

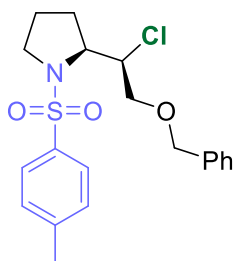

**5c**

**(S)-2-((R)-2-(benzyloxy)-1-chloroethyl)-1-tosylpyrrolidine 5c**: yield: 31.9 mg (81%); (Flash column chromatography eluent, petroleum ether/ethyl acetate = 5/1); colorless oil;  $[\alpha]_D^{20}$  = +30.5 (c 0.32  $CH_2Cl_2$ );  **$^1H$  NMR** (600 MHz,  $CDCl_3$ )  $\delta$  7.72 (d,  $J$  = 8.1 Hz, 2H), 7.41 – 7.34 (m, 4H), 7.32 – 7.30 (m, 3H), 4.65 (d,  $J$  = 11.2 Hz, 1H), 4.59 – 4.53 (m, 2H), 4.06 – 4.04 (m, 1H), 3.97 – 3.94 (m, 1H), 3.80 – 3.77 (m, 1H), 3.42 – 3.38 (m, 1H), 3.33 – 3.29 (m, 1H), 2.44 (s, 3H), 2.03 – 1.99 (m, 1H), 1.77 – 1.70 (m, 1H), 1.38 – 1.32 (m, 2H).  **$^{13}C$  NMR** (151 MHz,  $CDCl_3$ )  $\delta$  143.9, 138.1, 134.5, 129.9, 128.5, 127.9, 127.8, 127.8, 73.4, 70.6, 62.4, 62.0, 50.7, 28.2, 24.4, 21.6; **HRMS (ESI)** calculated for  $C_{20}H_{25}ClNO_3S$   $[M+H]^+$ : 394.1244, found: 394.1248; **Enantiomeric ratio**: 87.5:12.5, determined by HPLC (Daicel Chirapak IA, isopropanol / hexanel = 5/95, flow rate = 1.0 mL/min, T = 30 °C,  $\lambda$  = 254 nm):  $t_R$  = 14.89 min (major),  $t_R$  = 14.05 min (minor).

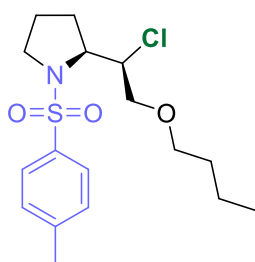

**5d**

**(S)-2-((R)-2-butoxy-1-chloroethyl)-1-tosylpyrrolidine 5d**: yield: 29.1 mg (81%); (Flash column chromatography eluent, petroleum ether/ethyl acetate = 5/1); colorless oil;  $[\alpha]_D^{20}$  = +40.0 (c 0.29  $CH_2Cl_2$ );  **$^1H$  NMR** (600 MHz,  $CDCl_3$ )  $\delta$  7.73 (d,  $J$  = 7.9 Hz, 2H), 7.33 (d,  $J$  = 7.9 Hz, 2H), 4.46 – 4.40 (m, 1H), 4.03 – 3.96 (m, 1H), 3.86 (dd,  $J$  = 10.6, 4.2 Hz, 1H), 3.72 (dd,  $J$  = 10.6, 7.0 Hz, 1H), 3.58 – 3.42 (m, 3H), 3.33 – 3.28 (m, 1H), 2.44 (s, 3H), 2.09 – 2.00 (m, 1H), 1.83 – 1.66 (m, 2H), 1.61 – 1.56 (m, 2H), 1.44 – 1.34 (m, 3H), 0.93 (t,  $J$  = 7.4 Hz, 3H);  **$^{13}C$  NMR** (151 MHz,  $CDCl_3$ )  $\delta$  143.9, 134.4, 129.9, 127.8, 71.3, 71.0, 62.4, 62.2, 50.7, 31.9, 28.1, 24.4, 21.6, 19.6, 14.0; **HRMS (ESI)** calculated for  $C_{17}H_{27}ClNO_3S$   $[M+H]^+$ : 360.1400, found: 360.1395; **Enantiomeric ratio**: 88.5:11.5, determined by HPLC (Daicel Chirapak IE, isopropanol / hexanel = 20/80, flow rate = 1.0 mL/min, T = 30 °C,  $\lambda$  = 254 nm):  $t_R$  = 11.50 min (major),  $t_R$  = 13.83 min (minor).

## 5. The Derivations of (S)-2-(Bromomethyl)-1-tosylpyrrolidine

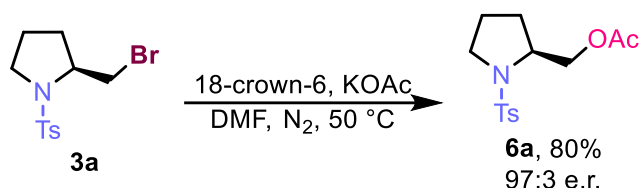

### (S)-(1-tosylpyrrolidin-2-yl)methyl acetate (6a):

To a solution of **3a** (0.10 mmol, 30mg) in DMF (1.0 mL) was added 18-crown-6 (0.2 mmol, 50 mg), KOAc (0.4 mmol, 41.6mg) and the reaction mixture was stirred under N<sub>2</sub> at 50 °C in the absence of light for 24 h. The mixture was diluted with Et<sub>2</sub>O. Organic phase was washed with H<sub>2</sub>O (2 × 5.0 mL), The organic volatile solvents were dried over anhydrous Na<sub>2</sub>SO<sub>4</sub> and concentrated under reduced pressure. The residue was purified by column chromatography on silica gel to afford the product **6a** (22.4 mg, 80% yield, 97:3 er). white solid; m.p.: 93.9 – 94.5 °C;  $[\alpha]_D^{20} = +59.6$  (c 0.23 CH<sub>2</sub>Cl<sub>2</sub>); <sup>1</sup>H NMR (600 MHz, CDCl<sub>3</sub>) δ 7.73 (d, *J* = 8.0 Hz, 2H), 7.32 (d, *J* = 8.0 Hz, 2H), 4.20 (dd, *J* = 11.0, 4.7 Hz, 1H), 4.13 – 4.10 (m, 1H), 3.93 – 3.86 (m, 1H), 3.47 – 3.40 (m, 1H), 3.17 (q, *J* = 8.9 Hz, 1H), 2.43 (s, 3H), 2.07 (s, 3H), 1.87 – 1.80 (m, 1H), 1.75 – 1.68 (m, 1H), 1.65 – 1.60 (m, 2H); <sup>13</sup>C NMR (151 MHz, CDCl<sub>3</sub>) δ 170.7, 143.6, 134.8, 129.8, 127.4, 66.2, 58.0, 49.2, 28.7, 24.1, 21.5, 20.9; HRMS (ESI) calculated for C<sub>14</sub>H<sub>19</sub>NNaO<sub>4</sub>S [M+Na]<sup>+</sup>: 320.0932, found: 320.0934; **Enantiomeric ratio**: 97:3, determined by HPLC (Daicel Chirapak IB, isopropanol / hexanel = 10/90, flow rate = 1.0 mL/min, T = 30 °C, λ = 254 nm): t<sub>R</sub> = 14.46 min (major), t<sub>R</sub> = 16.01 min (minor).

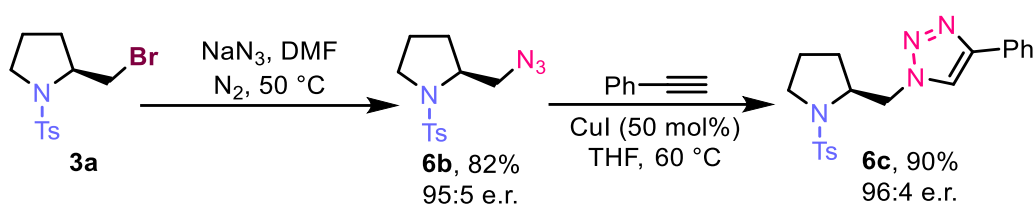

### (S)-2-(azidomethyl)-1-tosylpyrrolidine (6b):

To a solution of **3** (0.10 mmol) in DMF (1.0 mL) was added NaN<sub>3</sub> (0.11 mmol), and the reaction mixture was stirred under N<sub>2</sub> at 50 °C in the absence of light for 24 h. Then the mixture was diluted with Et<sub>2</sub>O. Organic phase was washed with H<sub>2</sub>O (2 × 5.0 mL), The organic volatile solvents were dried over anhydrous Na<sub>2</sub>SO<sub>4</sub> and concentrated under reduced pressure. The residue was purified by column chromatography on silica gel to afford the product **6b** (75% yield, 95:5 er). white solid; m.p.: 124.5 – 125.2 °C;  $[\alpha]_D^{20} = -36.9$  (c 0.35 CH<sub>2</sub>Cl<sub>2</sub>); <sup>1</sup>H NMR (600 MHz, CDCl<sub>3</sub>) δ 7.73 (d, *J* = 8.2 Hz, 2H), 7.33 (d, *J* = 7.9 Hz, 2H), 3.73 – 3.69 (m, 1H), 3.56 (dd, *J* = 12.2, 3.4 Hz, 1H), 3.53 – 3.42 (m,

2H), 3.18 – 3.14 (m, 1H), 2.44 (s, 3H), 1.91 – 1.83 (m, 1H), 1.82 – 1.80 (m, 1H), 1.72 – 1.65 (m, 1H), 1.60 – 1.55 (m, 1H);  $^{13}\text{C}$  NMR (151 MHz,  $\text{CDCl}_3$ )  $\delta$  143.8, 134.4, 129.9, 127.7, 59.0, 55.4, 49.6, 29.5, 24.2, 21.6; **HRMS (ESI)** calculated for  $\text{C}_{12}\text{H}_{16}\text{N}_4\text{NaO}_2\text{S}$   $[\text{M}+\text{Na}]^+$ : 303.0892, found: 303.0893; **Enantiomeric ratio**: 95:5, determined by HPLC (Daicel Chirapak IB, isopropanol / hexanel = 20/80, flow rate = 1.0 mL/min,  $T = 30\text{ }^\circ\text{C}$ ,  $\lambda = 254\text{ nm}$ ):  $t_{\text{R}} = 7.63\text{ min}$  (major),  $t_{\text{R}} = 8.10\text{ min}$  (minor).

**(S)-4-phenyl-1-((1-tosylpyrrolidin-2-yl)methyl)-1H-1,2,3-triazole (6c):**

To an oven-dried round bottom flask with magnetic stir bar was added **6b** (0.107 mmol, 30 mg), phenyl acetylene (0.214 mmol, 21.85 mg), CuI (0.0214 mmol, 4.1 mg) and THF (2ml) The solution was heated at  $60\text{ }^\circ\text{C}$  for 4 h. The reaction mixture was diluted with  $\text{CH}_2\text{Cl}_2$  (10.0 mL) and  $\text{H}_2\text{O}$  (5.0 mL). Organic was separated and the aqueous was extracted with  $\text{CH}_2\text{Cl}_2$  ( $2 \times 10.0\text{ mL}$ ). The combined organic phase was dried over anhydrous  $\text{Na}_2\text{SO}_4$  and concentrated under reduced pressure. The residue was purified by column chromatography on silica gel to afford the product **6c** (37.8mg, 90% yield, 96:4 er). white solid; m.p.:  $133.6 - 134.4\text{ }^\circ\text{C}$ ;  $[\alpha]_{\text{D}}^{20} = +110.7$  (c 0.38  $\text{CH}_2\text{Cl}_2$ );  $^1\text{H}$  NMR (600 MHz,  $\text{CDCl}_3$ )  $\delta$  8.02 (s, 1H), 7.92 – 7.82 (m, 2H), 7.76 (d,  $J = 8.2\text{ Hz}$ , 2H), 7.44 (t,  $J = 7.7\text{ Hz}$ , 2H), 7.39 – 7.29 (m, 3H), 4.76 – 4.72 (m, 2H), 3.91 (dd,  $J = 11.9, 8.4\text{ Hz}$ , 1H), 3.28 – 3.24 (m, 1H), 3.09 – 3.00 (m, 1H), 2.45 (s, 3H), 2.00 – 1.95 (m, 1H), 1.76 – 1.60 (m, 2H), 1.41 – 1.37 (m, 1H), 1.24 – 1.19 (m, 1H);  $^{13}\text{C}$  NMR (151 MHz,  $\text{CDCl}_3$ )  $\delta$  147.9, 144.2, 133.6, 130.0, 128.9, 128.3, 127.7, 125.9, 121.4, 59.4, 54.4, 49.7, 29.2, 23.8, 21.6; **HRMS (ESI)** calculated for  $\text{C}_{20}\text{H}_{23}\text{N}_4\text{O}_2\text{S}$   $[\text{M}+\text{H}]^+$ : 383.1543, found: 383.1542; **Enantiomeric ratio**: 96:4, determined by HPLC (Daicel Chirapak IB, isopropanol / hexanel = 30/70, flow rate = 1.0 mL/min,  $T = 30\text{ }^\circ\text{C}$ ,  $\lambda = 254\text{ nm}$ ):  $t_{\text{R}} = 17.33\text{ min}$  (major),  $t_{\text{R}} = 14.80\text{ min}$  (minor).

## 6. General Procedure for Nonlinear Effect Studies

Combining the certain amounts of optically pure  $\Lambda$ -(*S,S*)-**1b** with pure  $\Delta$ -(*R,R*)-**1b** leads to the formation of the specified *ee* values of catalyst **1b** (preferentially in  $\Lambda$ -(*S,S*)-**1b**). Eight reactions containing the mixed catalyst of racemic, 17%, 33%, 54%, 67%, 89% and >99% optical purity were performed in parallel (Figure S1). As shown in Figure S1, a positive nonlinear effect was found for the bromocyclization.

**General procedure:** A 10-mL oven-dried vial was charged with alkene **2a** (0.10 mmol), activated NaBr (11 mg), catalyst **1b** with different *ee* values (0.0005 mmol, 0.5 mol%) and MTBE (2.0 mL) at room temperature. The mixture was cooled to 0 °C and stirred for 15 min. The Oxone (0.30 mmol) was added and the resulting solution was stirred vigorously. After 48 h, the reaction was then saturated aqueous Na<sub>2</sub>S<sub>2</sub>O<sub>3</sub> (0.2 mL). The mixture was purified by flash column chromatography (silica gel, petrol ether/EtOAc = 5:1) to give the enantioenriched product **3a**.

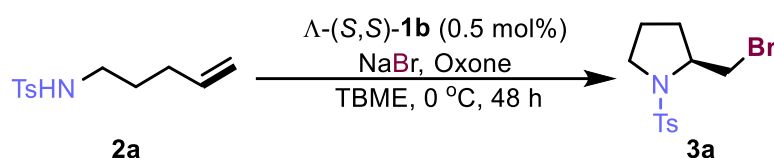

**Table S4** | Nonlinear effect studies

| Entry | <i>ee</i> of $\Lambda$ -( <i>S,S</i> )- <b>1b</b> (%) | <i>ee</i> of <b>3a</b> (%) |
|-------|-------------------------------------------------------|----------------------------|
| 1     | 0                                                     | 0                          |
| 2     | 17                                                    | 79                         |
| 3     | 33                                                    | 87                         |
| 4     | 54                                                    | 88                         |
| 5     | 67                                                    | 91                         |
| 7     | 89                                                    | 91                         |
| 8     | 100                                                   | 94                         |

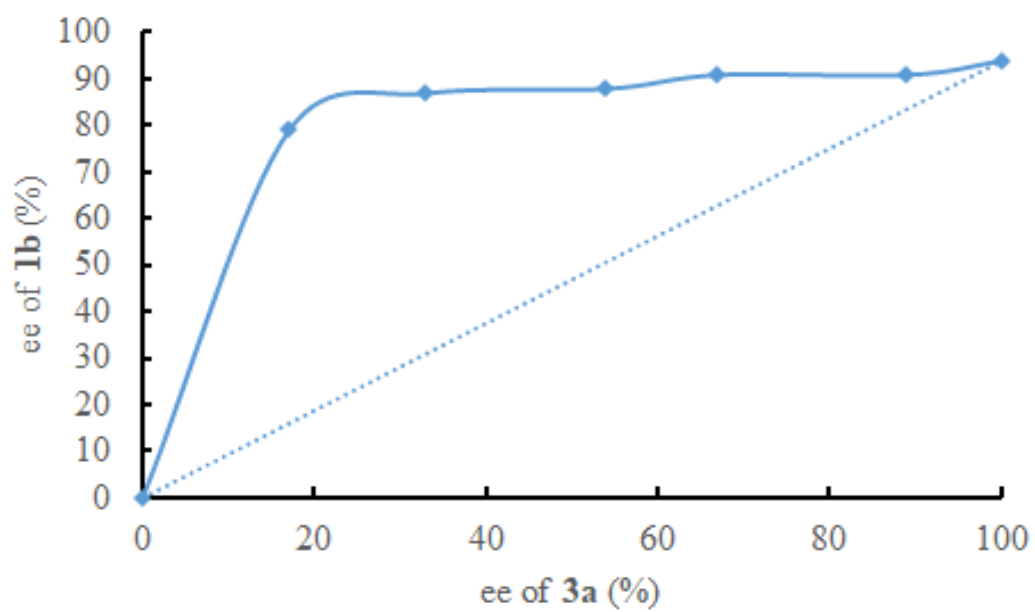

**Figure S1.** Nonlinear effect studies

## 7. X-Ray Diffraction Data

### 7.1. X-ray single crystal data for 3k

**Sample preparation for crystal growth:** absolute configuration of Compound **3k** (40.0 mg) was dissolved in DCM/*n*-hex (v/v = 1/3, 4.0 mL), while slow evaporation of solvent at room temperature dark brown red crystals were grown. Thermal ellipsoids are shown at 50% probability.

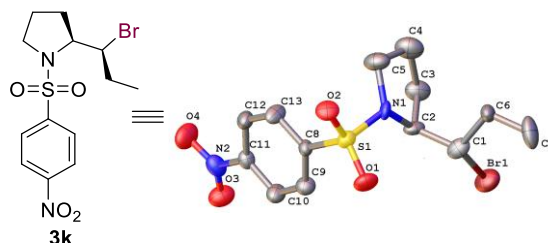

**Table S5.** Crystal data and structure refinement for **3k** (CCDC 2376580)

|                                    |                                                                   |
|------------------------------------|-------------------------------------------------------------------|
| Empirical formula                  | C <sub>13</sub> H <sub>17</sub> BrN <sub>2</sub> O <sub>4</sub> S |
| Formula weight                     | 377.25                                                            |
| Temperature/K                      | 296.15                                                            |
| Crystal system                     | monoclinic                                                        |
| Space group                        | C2                                                                |
| a/Å                                | 12.403(11)                                                        |
| b/Å                                | 5.914(4)                                                          |
| c/Å                                | 22.599(16)                                                        |
| α/°                                | 90                                                                |
| β/°                                | 104.87(2)                                                         |
| γ/°                                | 90                                                                |
| Volume/Å <sup>3</sup>              | 1602(2)                                                           |
| Z                                  | 4                                                                 |
| ρ <sub>calc</sub> /cm <sup>3</sup> | 1.564                                                             |
| μ/mm <sup>-1</sup>                 | 2.712                                                             |
| F(000)                             | 768.0                                                             |
| Crystal size/mm <sup>3</sup>       | 0.15 × 0.05 × 0.01                                                |
| Radiation                          | MoKα (λ = 0.71073)                                                |
| 2θ range for data collection/°     | 5.596 to 51.35                                                    |
| Index ranges                       | -14 ≤ h ≤ 14, -7 ≤ k ≤ 7, -27 ≤ l ≤ 27                            |
| Reflections collected              | 5439                                                              |
| Independent reflections            | 2581 [R <sub>int</sub> = 0.1062, R <sub>sigma</sub> = 0.1727]     |
| Data/restraints/parameters         | 2581/19/191                                                       |



|                                                |                                  |
|------------------------------------------------|----------------------------------|
| Goodness-of-fit on $F^2$                       | 0.968                            |
| Final R indexes [ $I \geq 2\sigma(I)$ ]        | $R_1 = 0.0782$ , $wR_2 = 0.1750$ |
| Final R indexes [all data]                     | $R_1 = 0.1754$ , $wR_2 = 0.2212$ |
| Largest diff. peak/hole / $e \text{ \AA}^{-3}$ | 0.91/-0.41                       |
| Flack parameter                                | 0.11(3)                          |

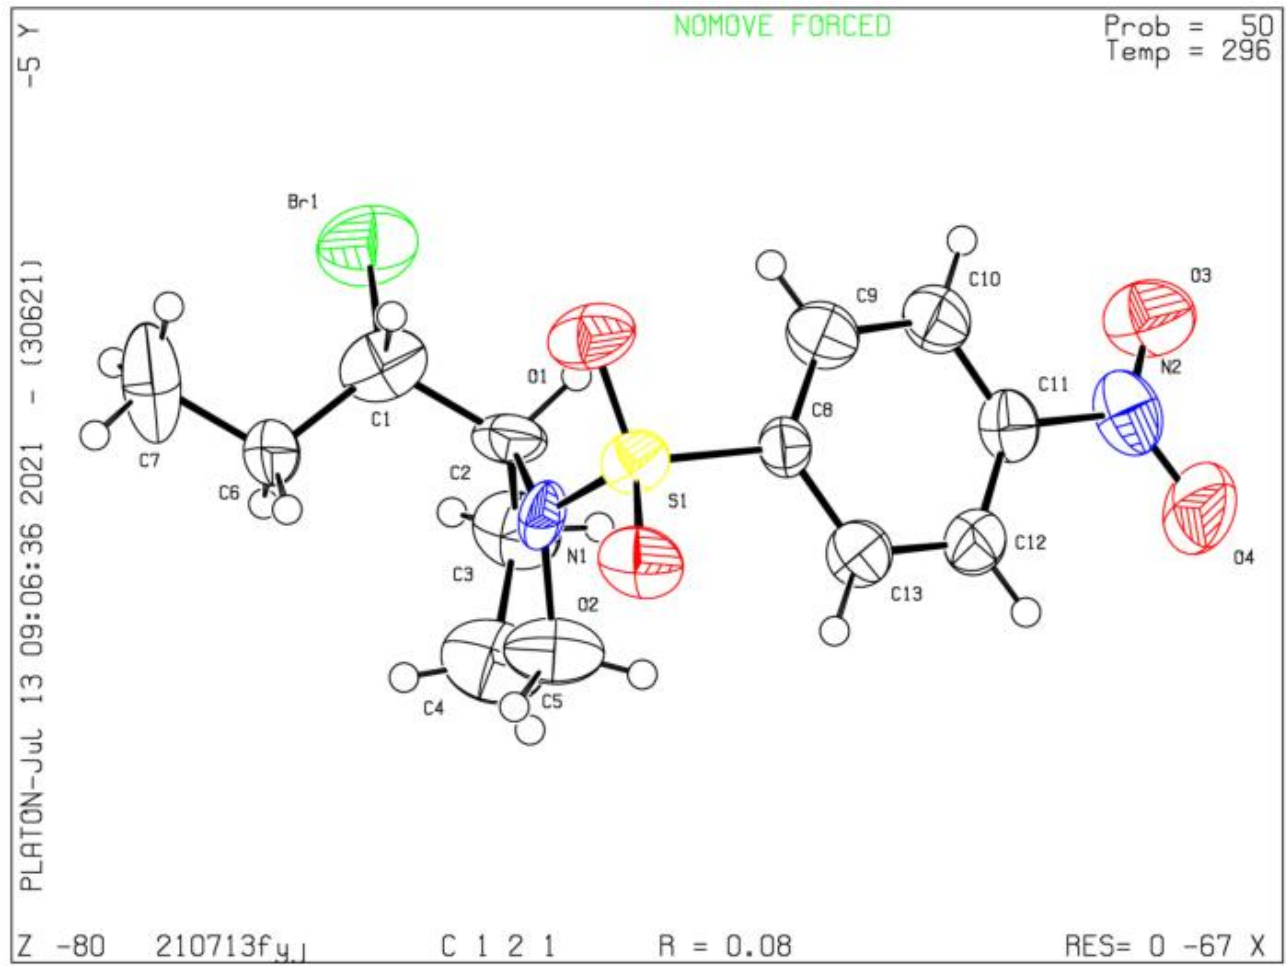

## 7.2. X-ray single crystal data for **3o**

**Sample preparation for crystal growth:** absolute configuration of Compound **3o** (40.0 mg) was dissolved in Et<sub>2</sub>O/DCM (v/v = 3/1, 4.0 mL), while slow evaporation of solvent at room temperature white crystals were grown. Thermal ellipsoids are shown at 50% probability.

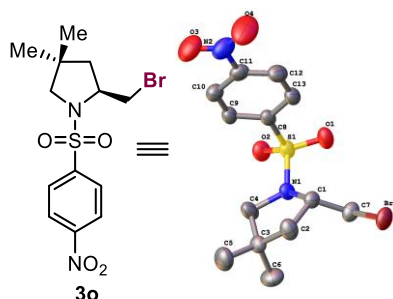

**Table S6.** Crystal data and structure refinement for **3o** (CCDC 2376475)

|                                    |                                                                   |
|------------------------------------|-------------------------------------------------------------------|
| Empirical formula                  | C <sub>13</sub> H <sub>17</sub> BrN <sub>2</sub> O <sub>4</sub> S |
| Formula weight                     | 377.25                                                            |
| Temperature/K                      | 296                                                               |
| Crystal system                     | monoclinic                                                        |
| Space group                        | P2 <sub>1</sub> /c                                                |
| a/Å                                | 10.0954(2)                                                        |
| b/Å                                | 6.18390(10)                                                       |
| c/Å                                | 13.3904(2)                                                        |
| α/°                                | 90                                                                |
| β/°                                | 106.3620(10)                                                      |
| γ/°                                | 90                                                                |
| Volume/Å <sup>3</sup>              | 802.09(2)                                                         |
| Z                                  | 2                                                                 |
| ρ <sub>calc</sub> /cm <sup>3</sup> | 1.562                                                             |
| μ/mm <sup>-1</sup>                 | 3.212                                                             |
| F(000)                             | 384.0                                                             |
| Crystal size/mm <sup>3</sup>       | 0.15 × 0.02 × 0.01                                                |
| Radiation                          | GaKα (λ = 1.34139)                                                |
| 2Θ range for data collection/°     | 5.984 to 109.784                                                  |
| Index ranges                       | -12 ≤ h ≤ 11, -7 ≤ k ≤ 7, -15 ≤ l ≤ 16                            |
| Reflections collected              | 12282                                                             |
| Independent reflections            | 3034 [R <sub>int</sub> = 0.0442, R <sub>sigma</sub> = 0.0339]     |
| Data/restraints/parameters         | 3034/1/192                                                        |

|                                                |                                  |
|------------------------------------------------|----------------------------------|
| Goodness-of-fit on $F^2$                       | 1.033                            |
| Final R indexes [ $I \geq 2\sigma(I)$ ]        | $R_1 = 0.0437$ , $wR_2 = 0.1146$ |
| Final R indexes [all data]                     | $R_1 = 0.0521$ , $wR_2 = 0.1239$ |
| Largest diff. peak/hole / $e \text{ \AA}^{-3}$ | 0.46/-0.41                       |
| Flack parameter                                | 0.032(16)                        |

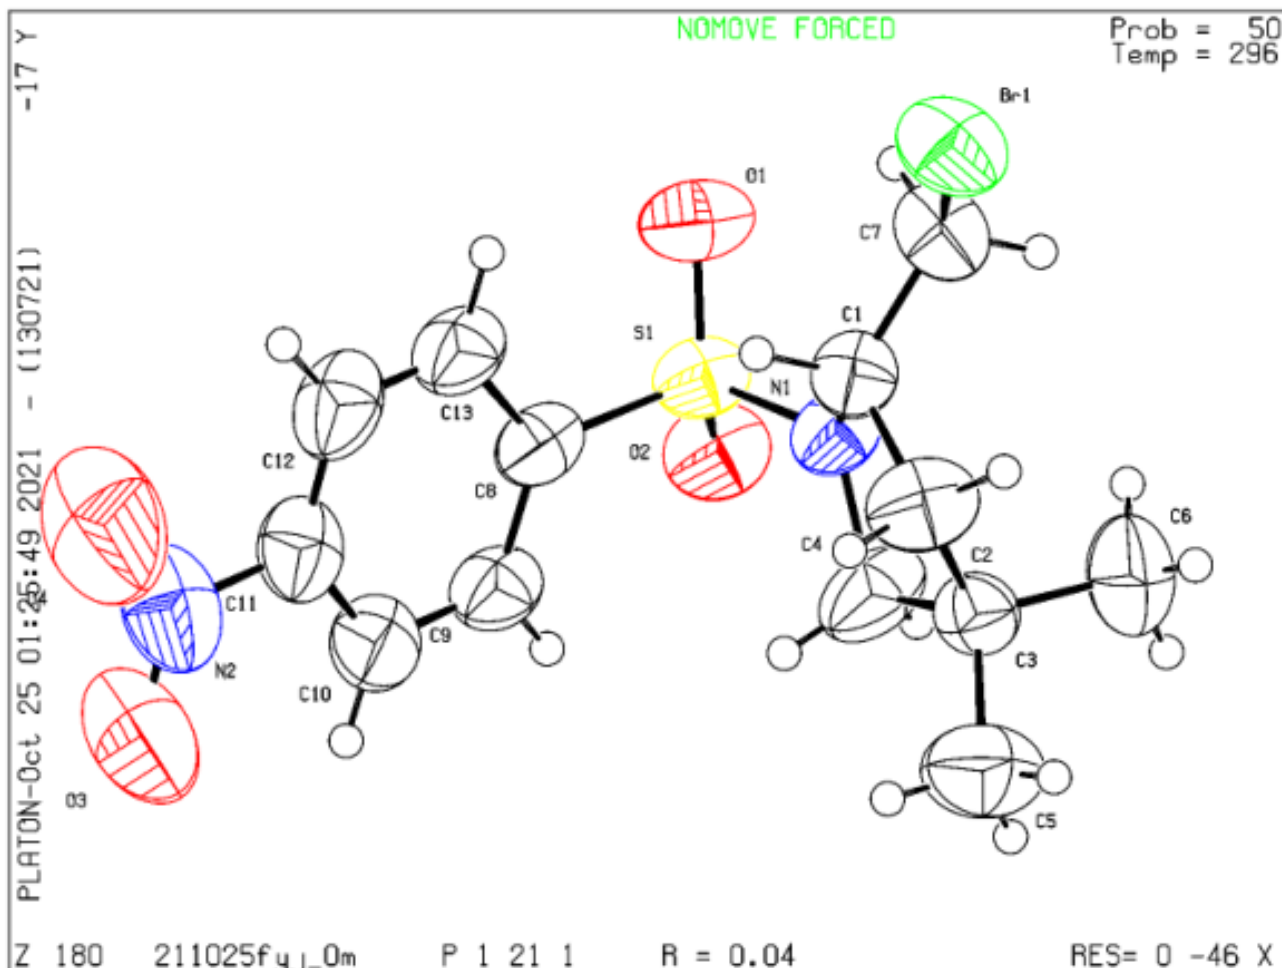

### 7.3. X-ray single crystal data for **3p**

**Sample preparation for crystal growth:** absolute configuration of Compound **3p** (40.0 mg) was dissolved in *n*-hexane/DCM (v/v = 3/1, 4.0 mL), while slow evaporation of solvent at room temperature white crystals were grown. Thermal ellipsoids are shown at 50% probability.

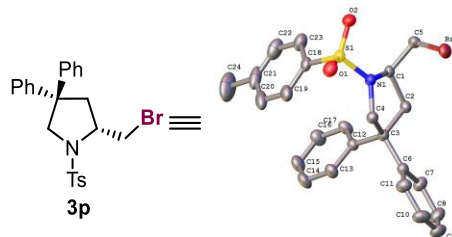

**Table S7.** Crystal data and structure refinement for **3p** (CCDC 2376474)

|                                    |                                                               |
|------------------------------------|---------------------------------------------------------------|
| Empirical formula                  | C <sub>24</sub> H <sub>24</sub> BrNO <sub>2</sub> S           |
| Formula weight                     | 470.41                                                        |
| Temperature/K                      | 296                                                           |
| Crystal system                     | orthorhombic                                                  |
| Space group                        | P2 <sub>1</sub> 2 <sub>1</sub> 2 <sub>1</sub>                 |
| a/Å                                | 9.8681(2)                                                     |
| b/Å                                | 10.6446(2)                                                    |
| c/Å                                | 21.1836(4)                                                    |
| α/°                                | 90                                                            |
| β/°                                | 90                                                            |
| γ/°                                | 90                                                            |
| Volume/Å <sup>3</sup>              | 2225.17(7)                                                    |
| Z                                  | 4                                                             |
| ρ <sub>calc</sub> /cm <sup>3</sup> | 1.404                                                         |
| μ/mm <sup>-1</sup>                 | 2.397                                                         |
| F(000)                             | 968.0                                                         |
| Crystal size/mm <sup>3</sup>       | 0.08 × 0.08 × 0.05                                            |
| Radiation                          | GaKα (λ = 1.34139)                                            |
| 2θ range for data collection/°     | 7.262 to 109.956                                              |
| Index ranges                       | -10 ≤ h ≤ 12, -12 ≤ k ≤ 12, -25 ≤ l ≤ 25                      |
| Reflections collected              | 23732                                                         |
| Independent reflections            | 4220 [R <sub>int</sub> = 0.0871, R <sub>sigma</sub> = 0.0537] |
| Data/restraints/parameters         | 4220/0/263                                                    |
| Goodness-of-fit on F <sup>2</sup>  | 1.070                                                         |

|                                                |                                  |
|------------------------------------------------|----------------------------------|
| Final R indexes [ $I \geq 2\sigma(I)$ ]        | $R_1 = 0.0383$ , $wR_2 = 0.0931$ |
| Final R indexes [all data]                     | $R_1 = 0.0418$ , $wR_2 = 0.0966$ |
| Largest diff. peak/hole / $e \text{ \AA}^{-3}$ | 0.34/-0.77                       |
| Flack parameter                                | 0.021(15)                        |

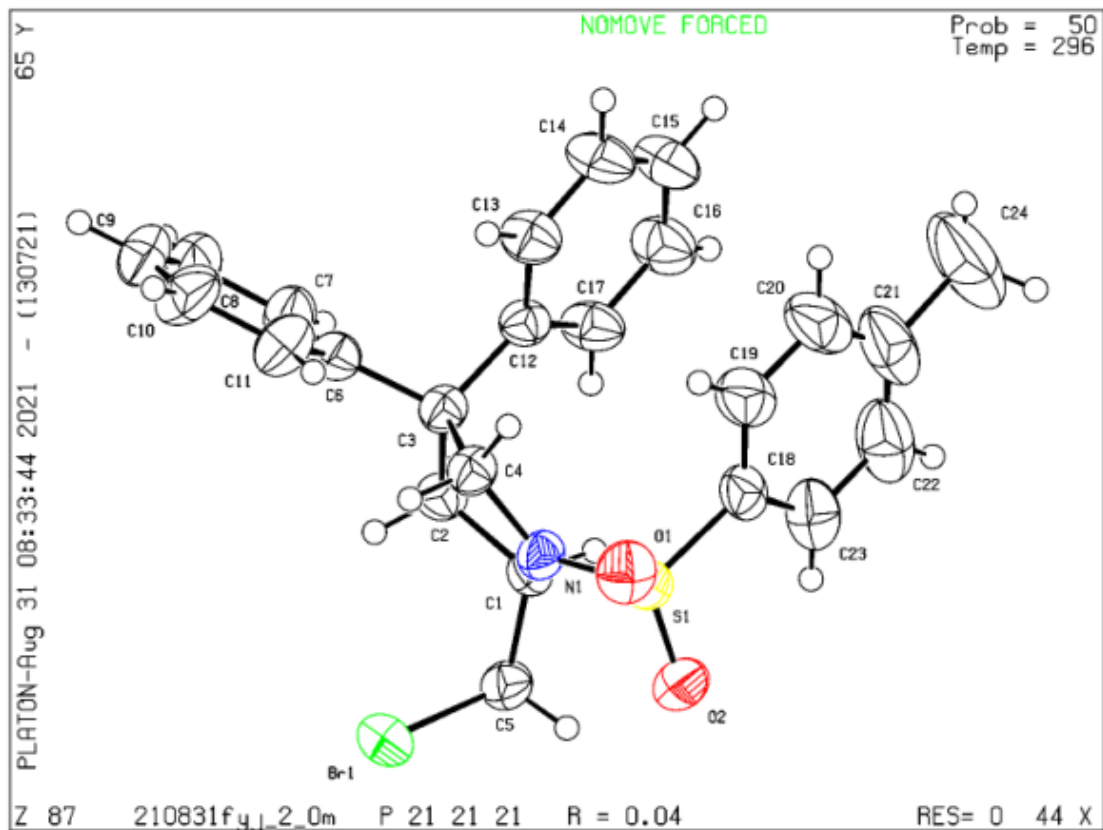

## 7.4. X-ray single crystal data for **5b**

**Sample preparation for crystal growth:** relative configuration of Compound **5b** (40.0 mg) was dissolved in Et<sub>2</sub>O/DCM/acetone (v/v/v = 4/1/1, 6.0 mL), while slow evaporation of solvent at room temperature white crystals were grown. Thermal ellipsoids are shown at 50% probability.

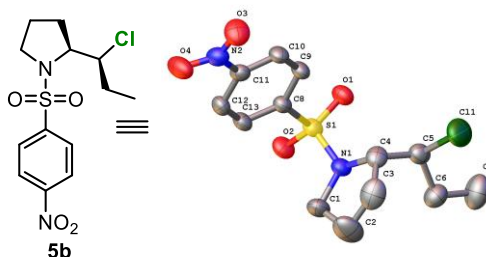

**Table S8.** Crystal data and structure refinement for **5b** (CCDC 2386476)

|                                    |                                                                   |
|------------------------------------|-------------------------------------------------------------------|
| Empirical formula                  | C <sub>13</sub> H <sub>17</sub> ClN <sub>2</sub> O <sub>4</sub> S |
| Formula weight                     | 332.79                                                            |
| Temperature/K                      | 296                                                               |
| Crystal system                     | monoclinic                                                        |
| Space group                        | P2 <sub>1</sub> /c                                                |
| a/Å                                | 22.112(7)                                                         |
| b/Å                                | 5.910(2)                                                          |
| c/Å                                | 12.384(4)                                                         |
| α/°                                | 90                                                                |
| β/°                                | 103.404(17)                                                       |
| γ/°                                | 90                                                                |
| Volume/Å <sup>3</sup>              | 1574.4(9)                                                         |
| Z                                  | 4                                                                 |
| ρ <sub>calc</sub> /cm <sup>3</sup> | 1.404                                                             |
| μ/mm <sup>-1</sup>                 | 2.322                                                             |
| F(000)                             | 696.0                                                             |
| Crystal size/mm <sup>3</sup>       | 0.08 × 0.03 × 0.01                                                |
| Radiation                          | GaKα (λ = 1.34139)                                                |
| 2θ range for data collection/°     | 7.15 to 109.95                                                    |
| Index ranges                       | -26 ≤ h ≤ 26, -4 ≤ k ≤ 7, -15 ≤ l ≤ 15                            |
| Reflections collected              | 12569                                                             |
| Independent reflections            | 2911 [R <sub>int</sub> = 0.0778, R <sub>sigma</sub> = 0.0577]     |
| Data/restraints/parameters         | 2911/0/191                                                        |

|                                                |                                  |
|------------------------------------------------|----------------------------------|
| Goodness-of-fit on $F^2$                       | 1.094                            |
| Final R indexes [ $I \geq 2\sigma(I)$ ]        | $R_1 = 0.0757$ , $wR_2 = 0.2055$ |
| Final R indexes [all data]                     | $R_1 = 0.1195$ , $wR_2 = 0.2448$ |
| Largest diff. peak/hole / $e \text{ \AA}^{-3}$ | 0.50/-0.51                       |

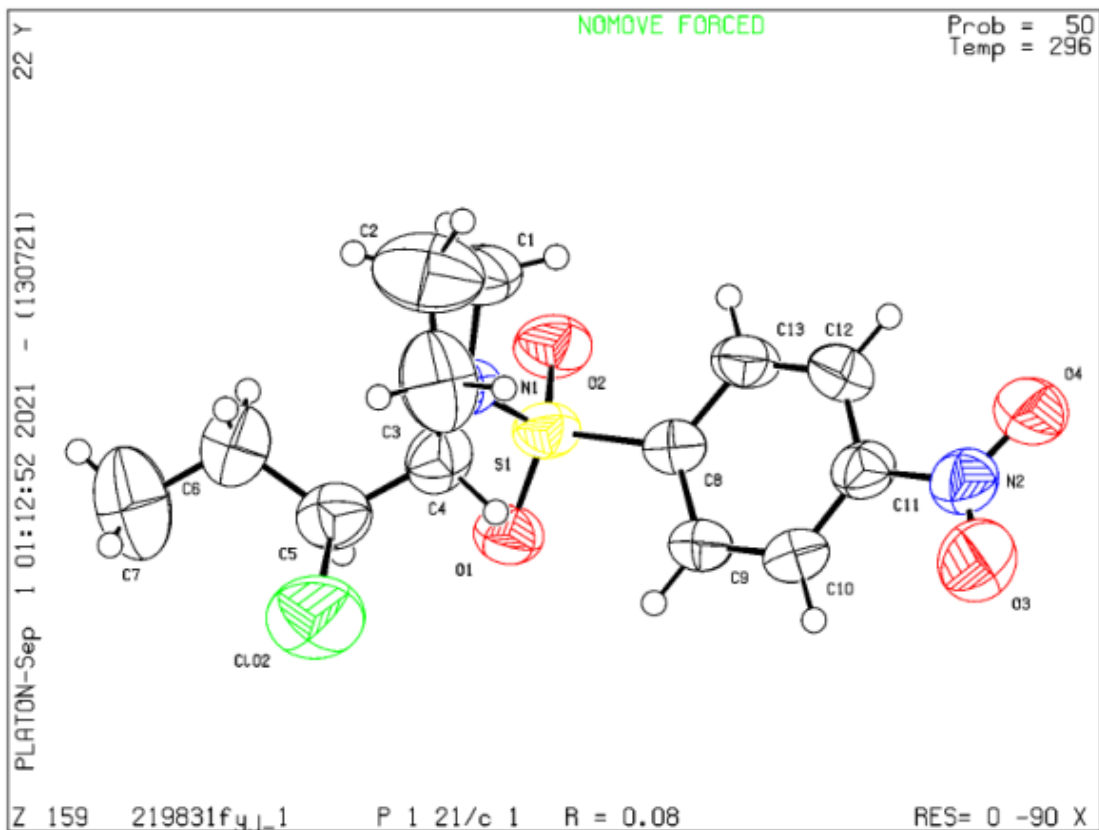

## 8. References

- [1](a) Yu, J.; Jiang, H.-J.; Zhou, Y.; Luo, S.-W.; Gong, L.-Z. *Angew. Chem., Int. Ed.* **2015**, *54*, 11209. (b) Jiang, H.-J.; Liu, K.; Yu, J.; Zhang, L.; Gong, L.-Z. *Angew. Chem., Int. Ed.* **2017**, *56*, 11931. (c) Jiang, H.-J.; Zhong, X.-M.; Y, J.; Zhang, Y.; Zhang, X.; Wu, Y.-D.; Gong, L.-Z. *Angew. Chem., Int. Ed.* **2019**, *58*, 1803. (d) Sun, T.-T.; Liu, K.; Zhang, S.-X.; Wang, C.-R.; Yao, C.-Z.; Yu, J. *Synlett* **2021**, *32*, 701.
- [2] Chen, J.; Guo, H.-M.; Zhao, Q.-Q.; Chen, J.-R.; Xiao W.-J. *Chem. Commun.* **2018**, *54*, 6780.
- [3] (a) Hu, X.-Q.; Chen, J.-R.; Wei, Q.; Liu, F.-L.; Deng, Q.-H.; Zou Y.-Q.; Xiao, W.-J. *Eur. J. Org. Chem.* **2014**, 3082. (b) Chen, J.; Yang, M.-N.; Chen, J.-R.; Xiao, W.-J. *Org. Lett.* **2018**, *20*, 3314. (c) Li, L.; Liu, P.; Su, Y.; Huang, H. *Org. Lett.* **2016**, *18*, 5736. (d) Chang, B.; Su, Y.; Huang, D.; Wang, K.-H.; Zhang, W.; Shi, Y.; Zhang, X.; Hu, Y. *J. Org. Chem.* **2018**, *83*, 4365. (e) Hu, X.-Q.; Chen, J.; Chen, J.-R.; Yan, D.-M.; Xiao, W.-J. *Chem.–Eur. J.* **2016**, *22*, 14141. (f) Tripathi, C. B.; Mukherjee, S. *Org. Lett.* **2014**, *16*, 3368.



## 9. Selected NMR and HPLC

### 9.1. NMR of the Substrates 2

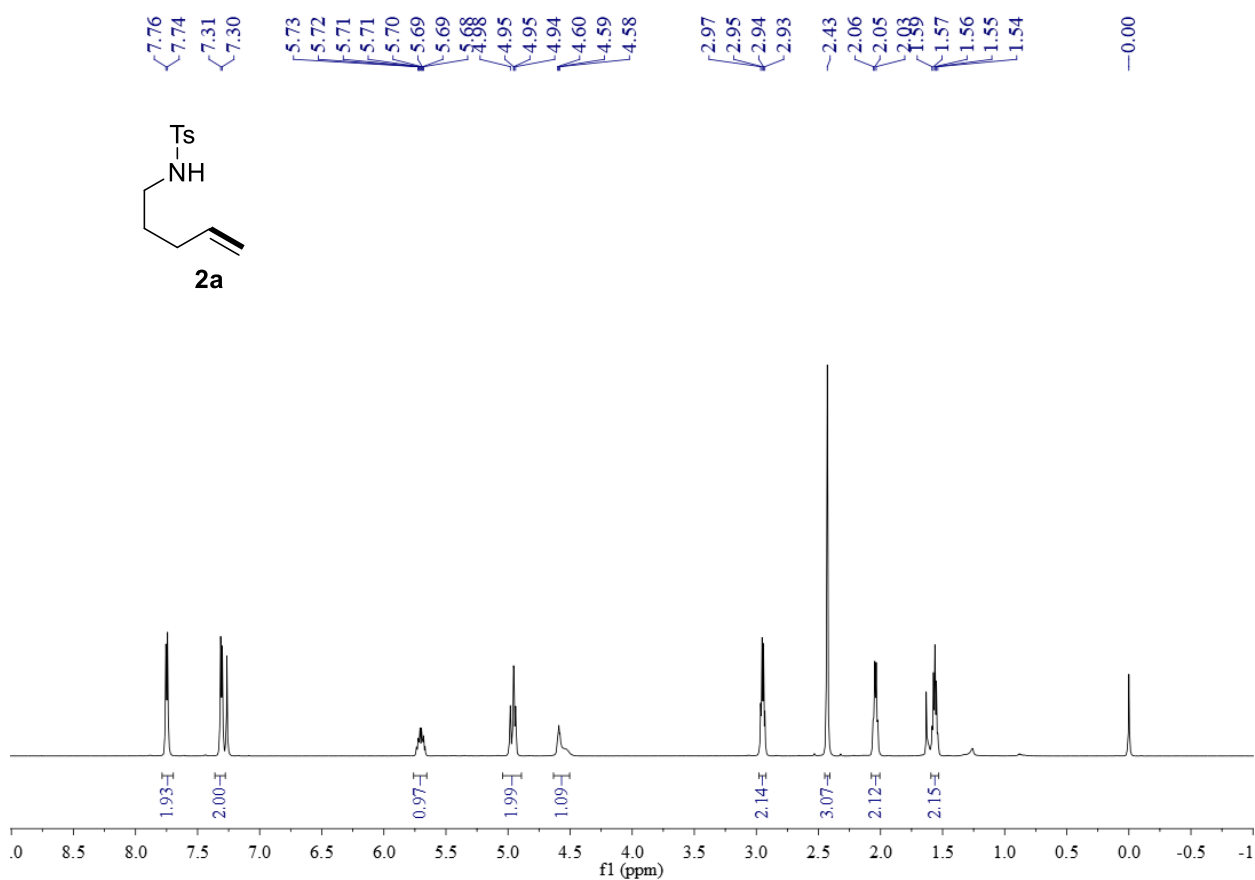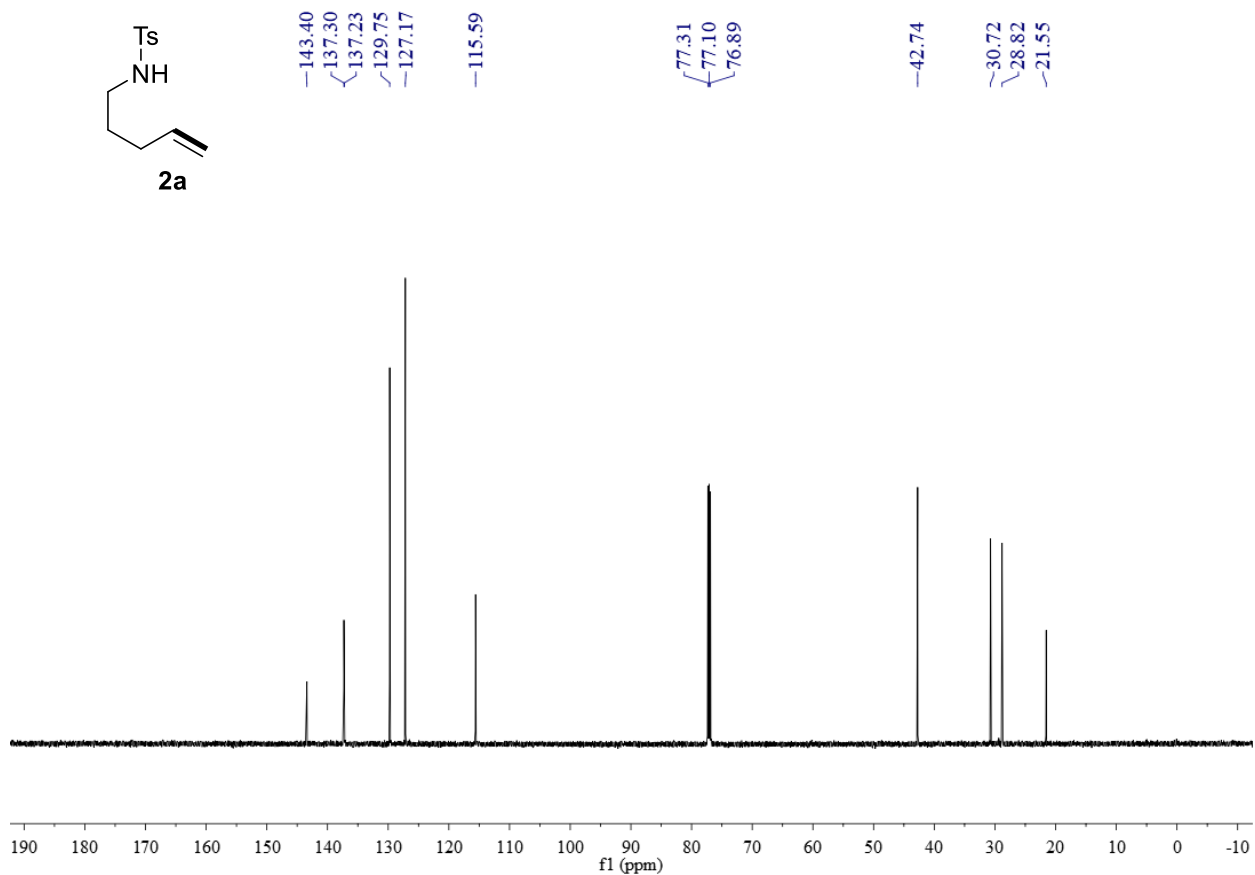

8.38  
8.36  
8.06  
8.05  
5.74  
5.73  
5.73  
5.72  
5.72  
5.70  
5.70  
5.69  
5.69  
5.68  
5.01  
5.01  
4.99  
4.99  
4.98  
4.97  
4.69  
3.06  
3.05  
3.03  
3.02  
2.09  
2.07  
2.06  
2.05  
1.63  
1.62  
1.61  
1.60  
1.59  
0.00

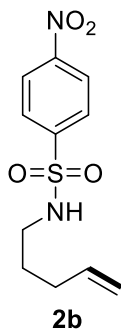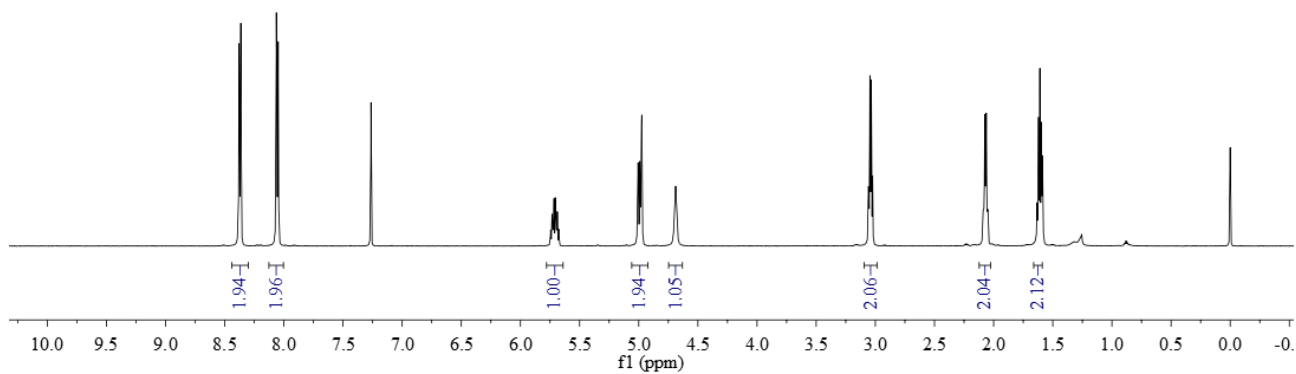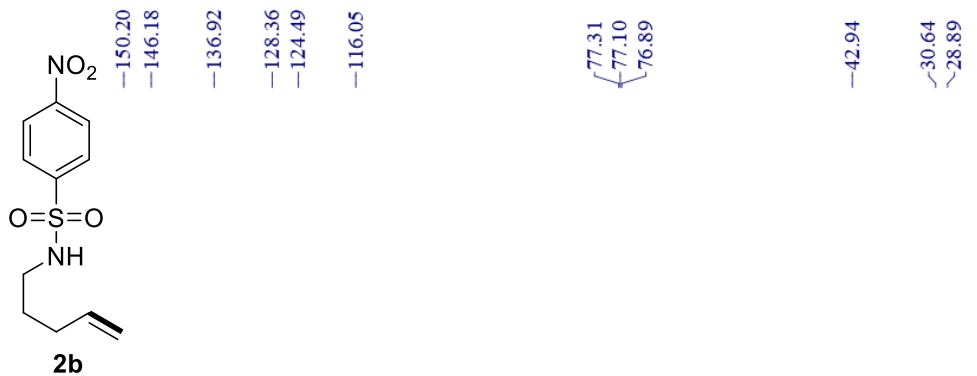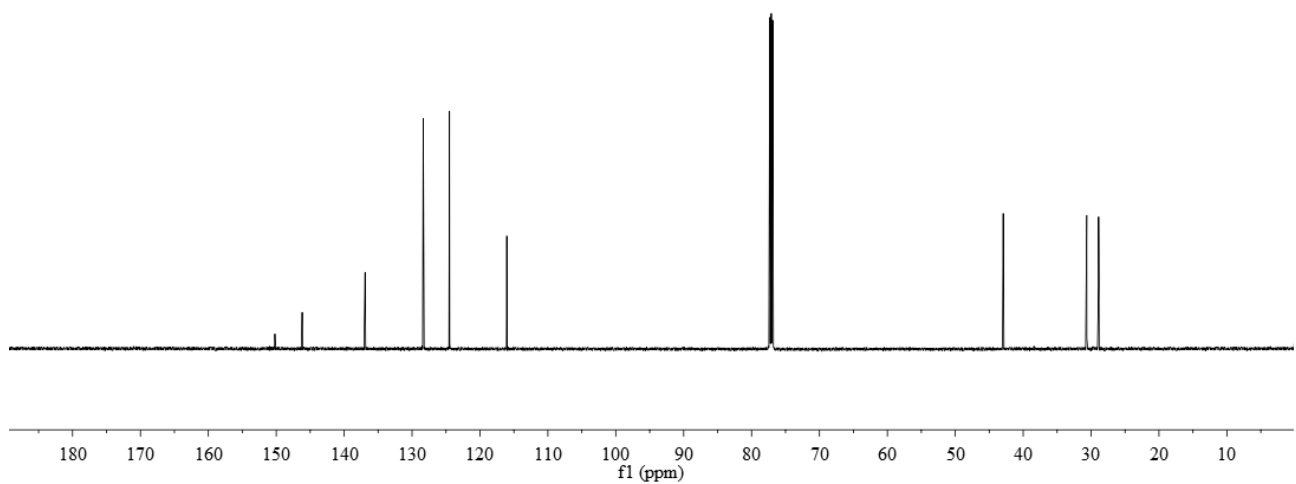

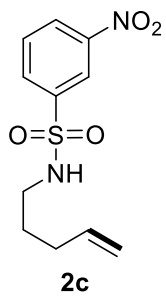

8.71  
 8.44  
 8.43  
 8.21  
 8.20  
 7.77  
 7.76  
 7.74

5.72  
 5.71  
 5.69  
 5.00  
 4.97  
 4.97  
 4.81

3.06  
 3.05  
 3.04  
 2.08  
 2.07  
 1.64  
 1.63  
 1.62  
 1.61

-0.00

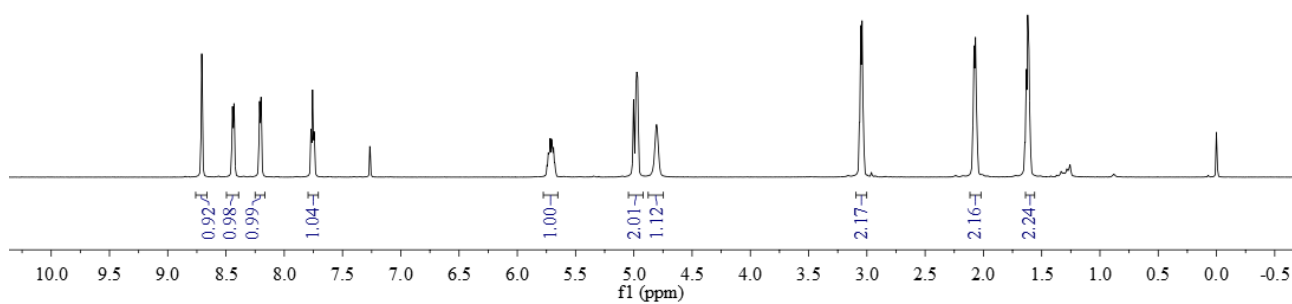

148.53  
 142.65  
 136.95  
 132.60  
 130.59  
 127.15  
 122.34  
 115.98

77.31  
 77.10  
 76.89

-42.93

30.62  
 28.87

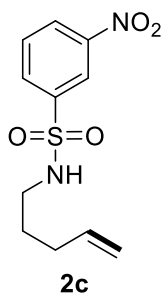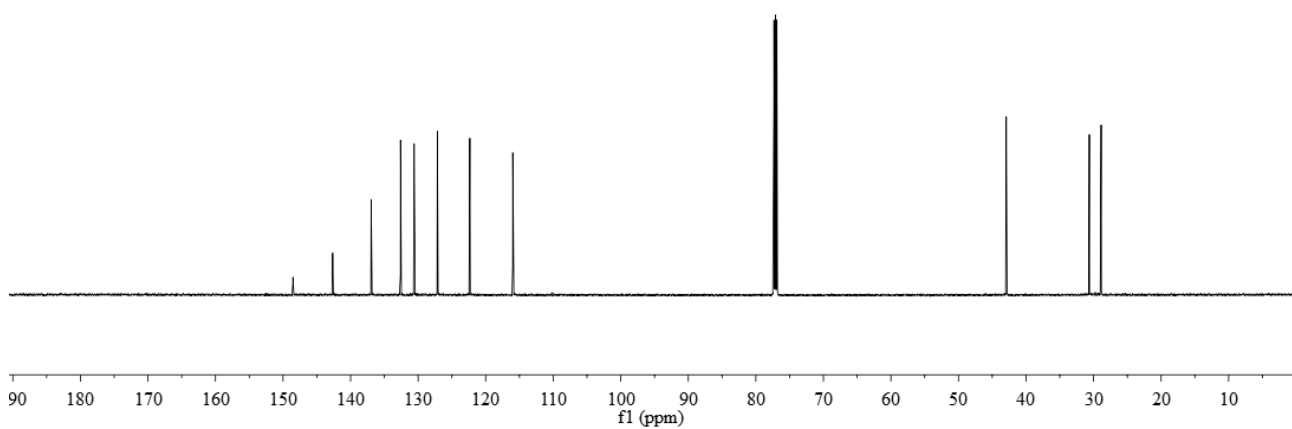

8.15  
8.14  
8.14  
8.14  
8.13  
7.87  
7.87  
7.86  
7.86  
7.76  
7.75  
7.74  
7.74  
7.73

5.74  
5.73  
5.72  
5.71  
5.70  
5.69  
5.68  
5.28  
5.01  
4.98  
4.98  
4.96  
3.13  
3.12  
3.11  
3.10  
2.11  
2.09  
2.08  
2.07  
1.67  
1.65  
1.64  
1.63  
1.62

---0.00

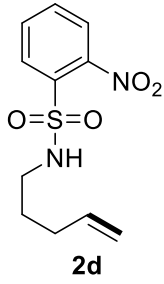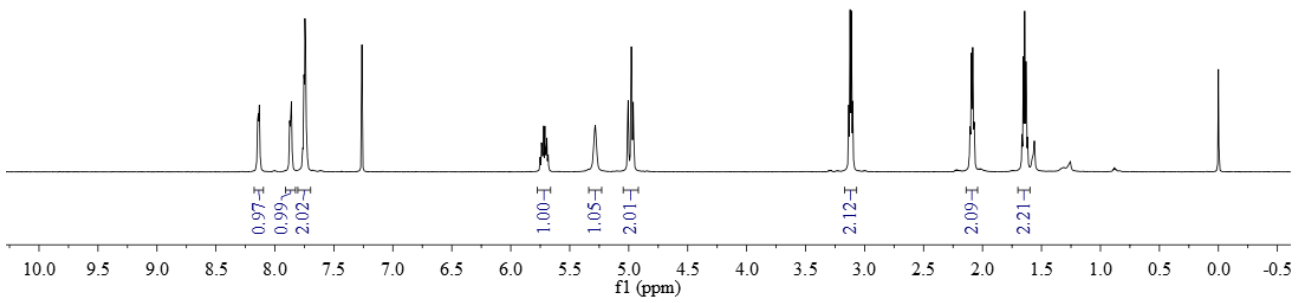

148.23  
137.01  
133.98  
133.57  
132.82  
131.16  
125.44  
115.89  
77.31  
77.10  
76.89  
43.30  
30.64  
28.80

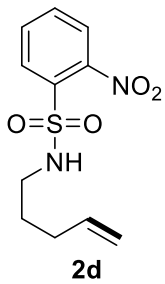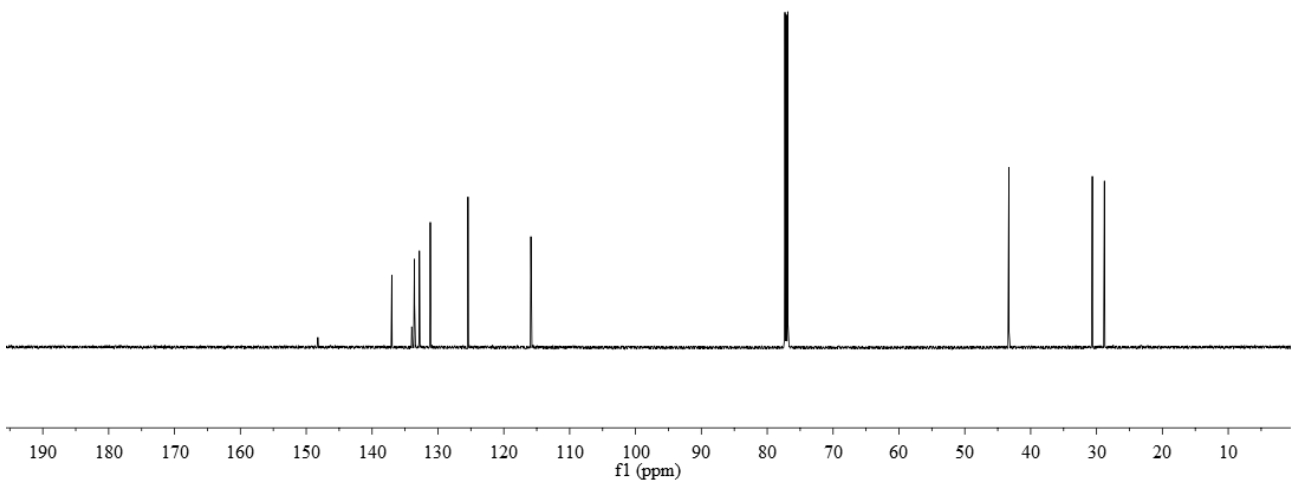

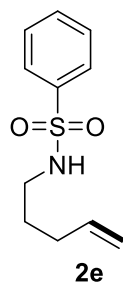

7.87  
7.86  
7.59  
7.58  
7.57  
7.53  
7.52  
7.51

5.74  
5.73  
5.71  
5.70  
5.68  
4.98  
4.96  
4.95  
-4.45

3.00  
2.99  
2.98  
2.06  
2.05  
2.04  
1.59  
1.58  
1.57  
1.56

-0.00

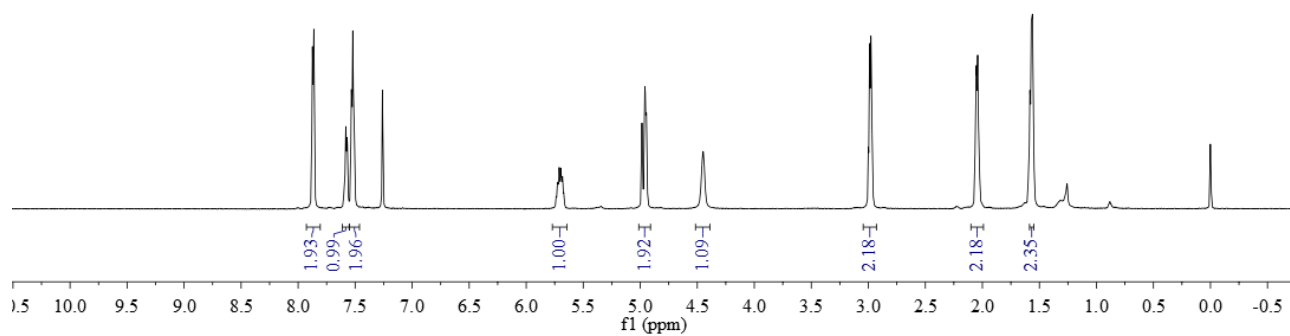

140.25  
137.23  
132.67  
129.19  
127.13

115.73

77.31  
77.10  
76.89

42.81

30.74  
28.88

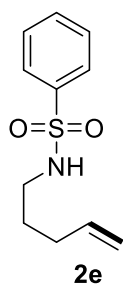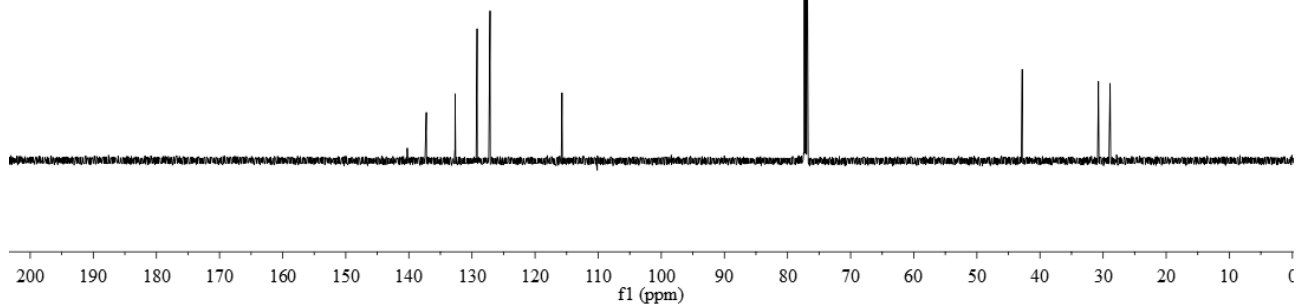

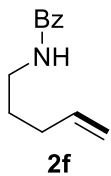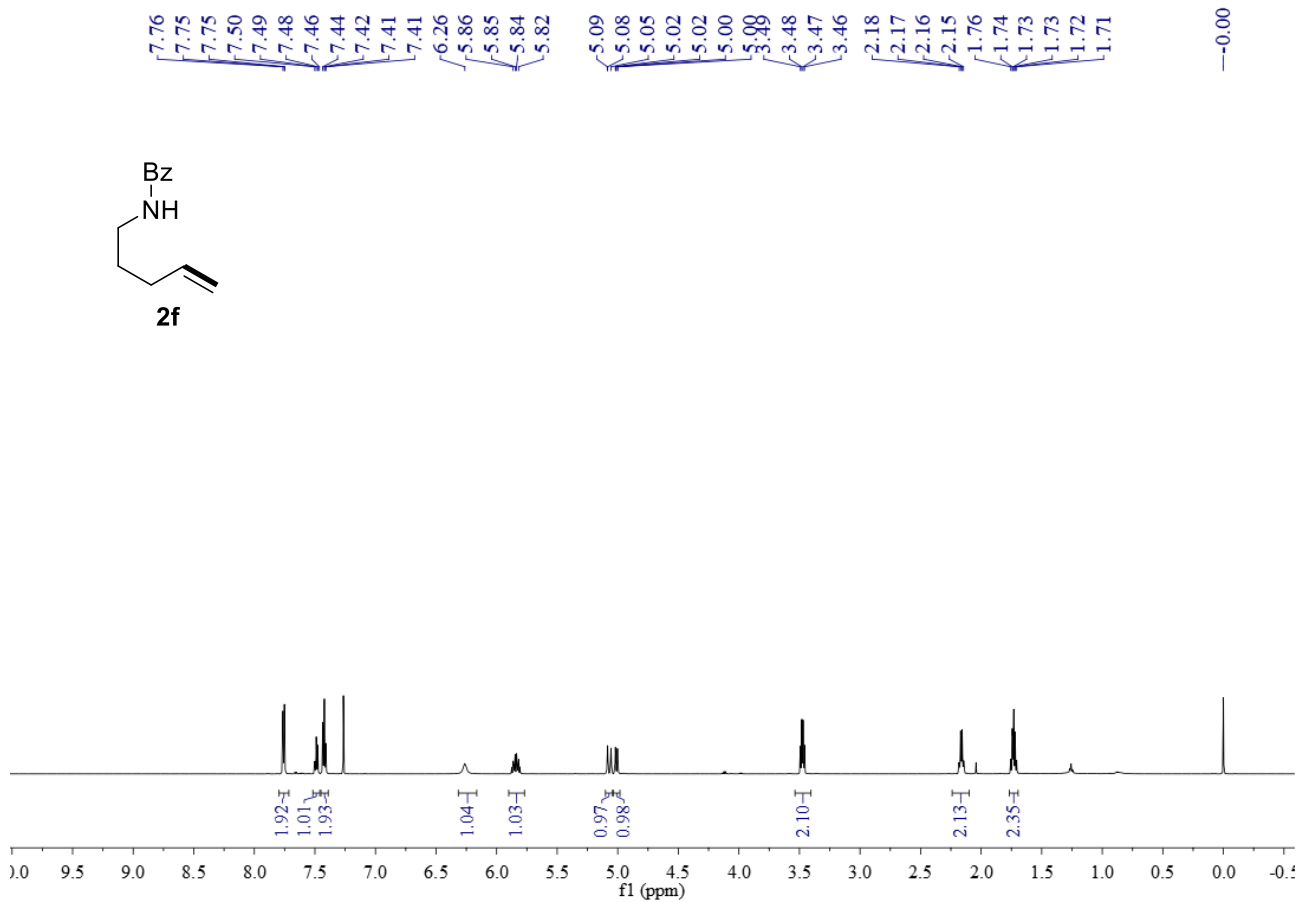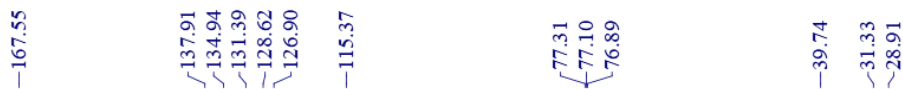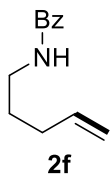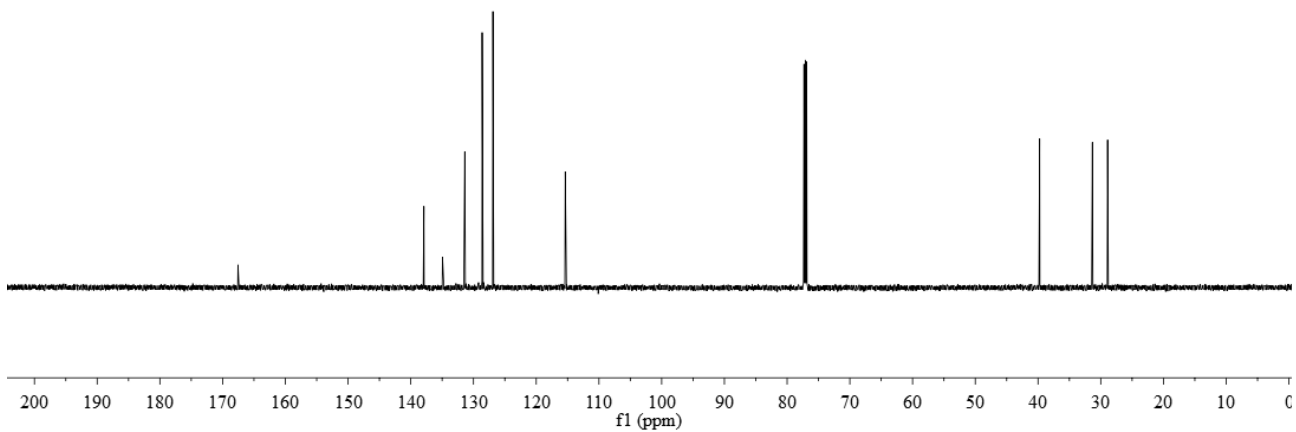

7.75  
7.73  
7.31  
7.30

5.39  
5.38  
5.36  
5.35  
5.26  
5.25  
5.23  
5.22  
-4.37

2.96  
2.94

-2.43

2.02  
2.01

1.53  
1.52  
1.29  
1.28  
1.28  
1.25  
0.87  
0.00

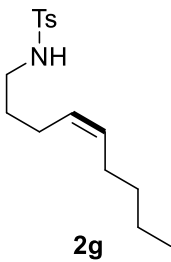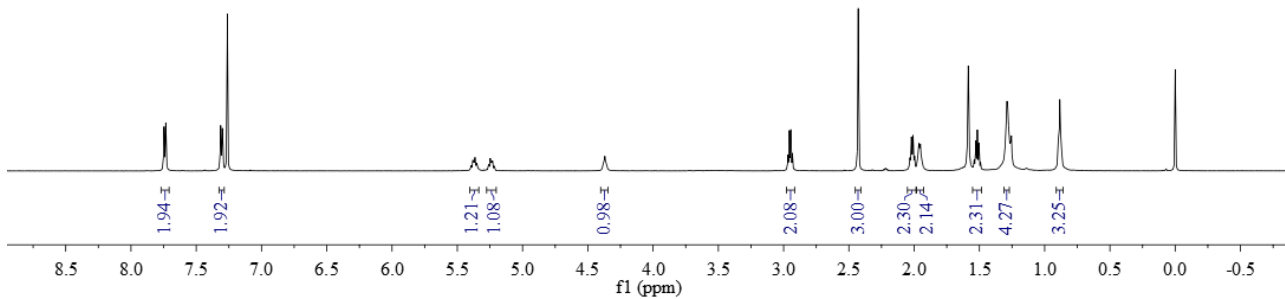

143.42  
137.23  
131.47  
129.77  
127.93  
127.19

77.31  
77.10  
76.89

-43.07

31.88  
29.69  
27.01  
24.43  
22.41  
21.59  
14.04

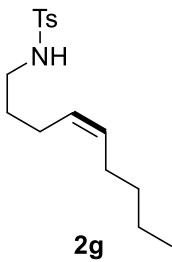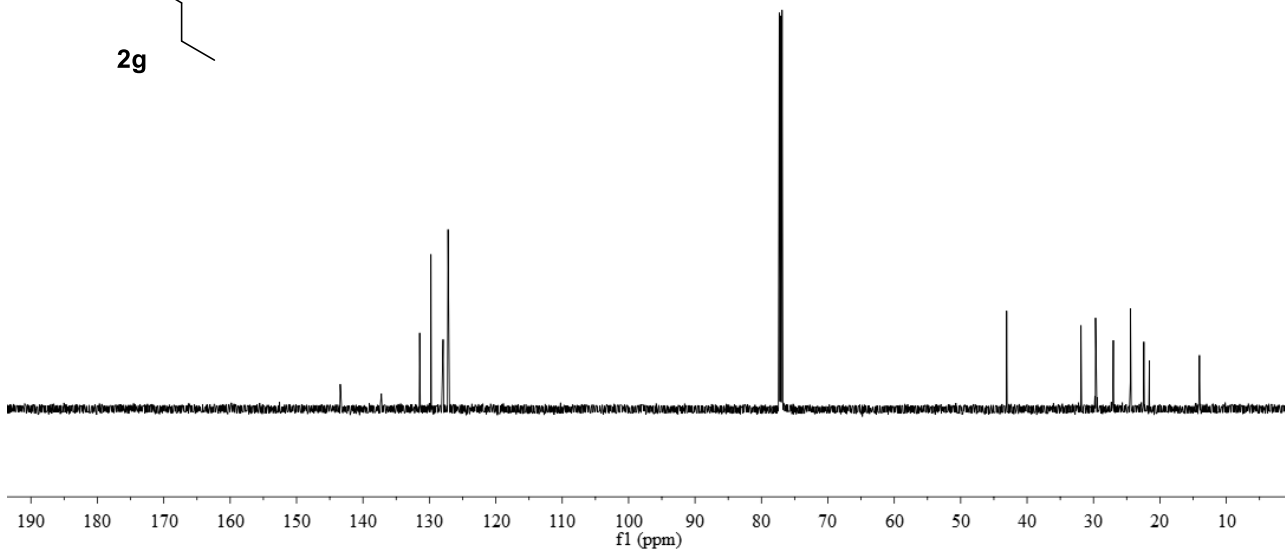

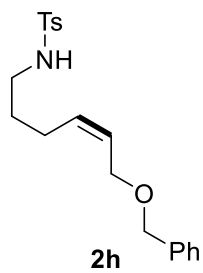

7.69, 7.68, 7.35, 7.34, 7.33, 7.30, 7.29, 7.27, 7.25, 5.64, 5.64, 5.63, 5.49, 5.48, 5.02, 4.53, 4.00, 3.99, 2.92, 2.90, 2.89, 2.88, 2.40, 2.10, 1.98, 1.96, 1.55, 1.54, 1.53, -0.00

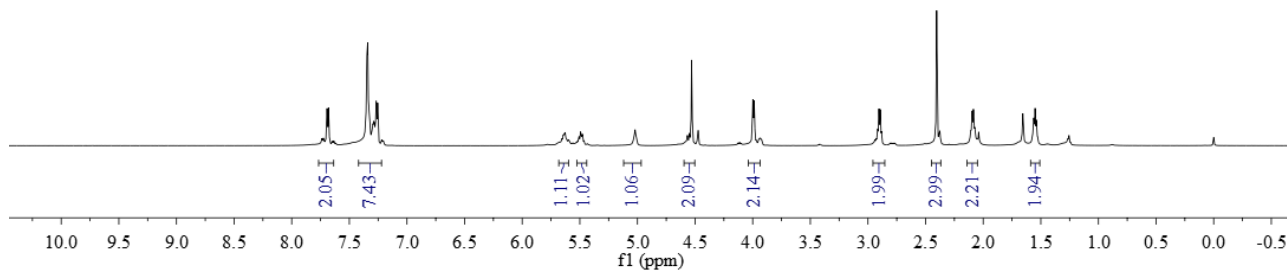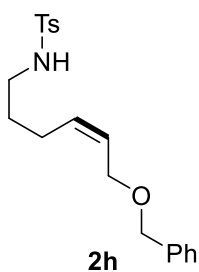

143.24, 138.21, 137.42, 132.87, 129.69, 128.48, 127.98, 127.76, 127.11, 127.06, 77.31, 77.10, 76.89, 72.51, 65.37, 42.26, 29.12, 24.44, 21.53

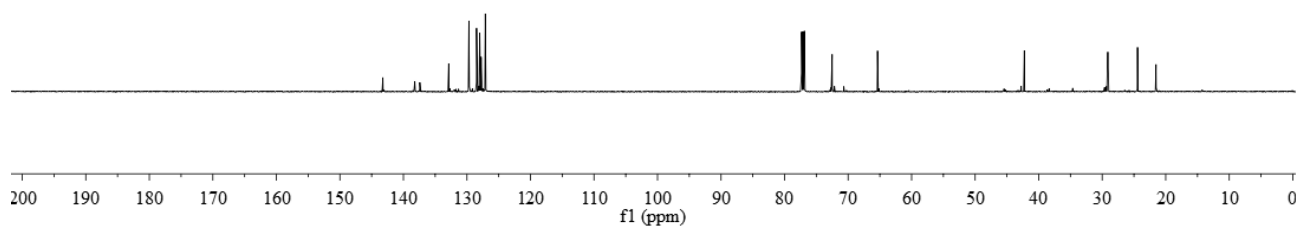



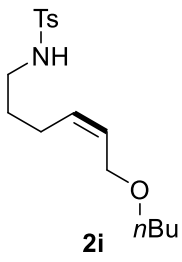

7.74  
7.73  
7.30  
7.29

5.59  
5.46  
5.45

4.92

3.95  
3.94

3.44  
3.43

2.95  
2.94  
2.42

2.13  
2.12

1.56  
1.37  
1.36

0.93  
0.92  
0.90

-0.00

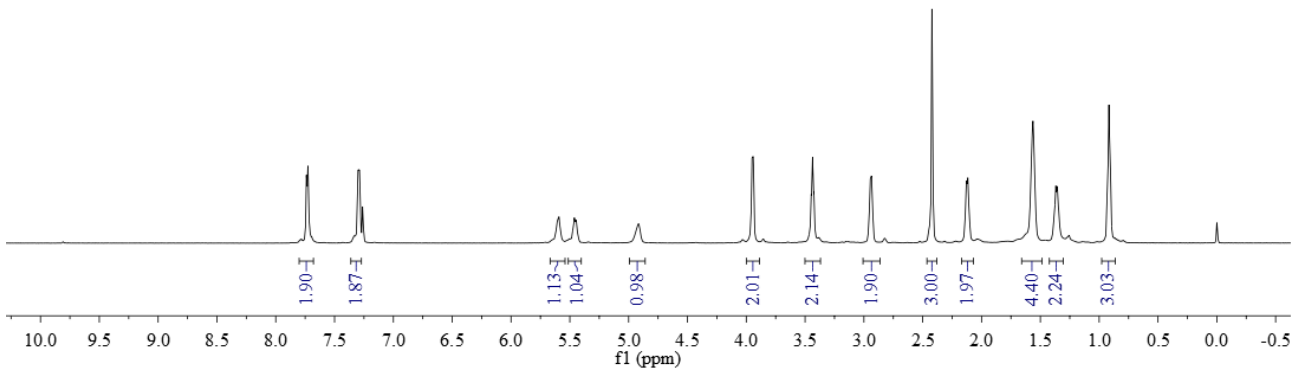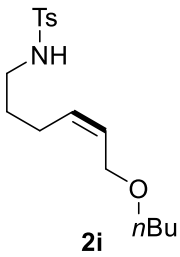

143.27  
137.57  
132.32  
129.72  
127.46  
127.12

77.31  
77.10  
76.89  
70.62  
66.12

42.30

31.82  
29.16  
24.41  
21.56  
19.43  
13.98

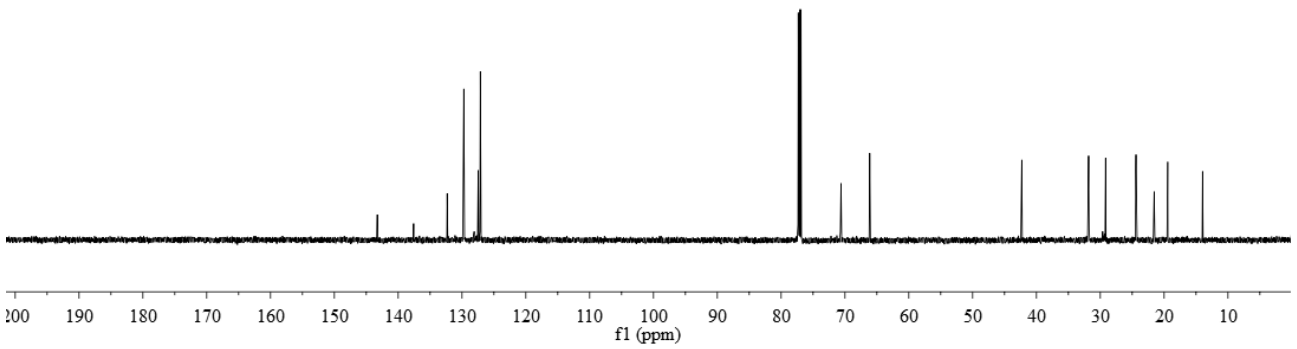

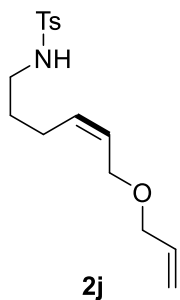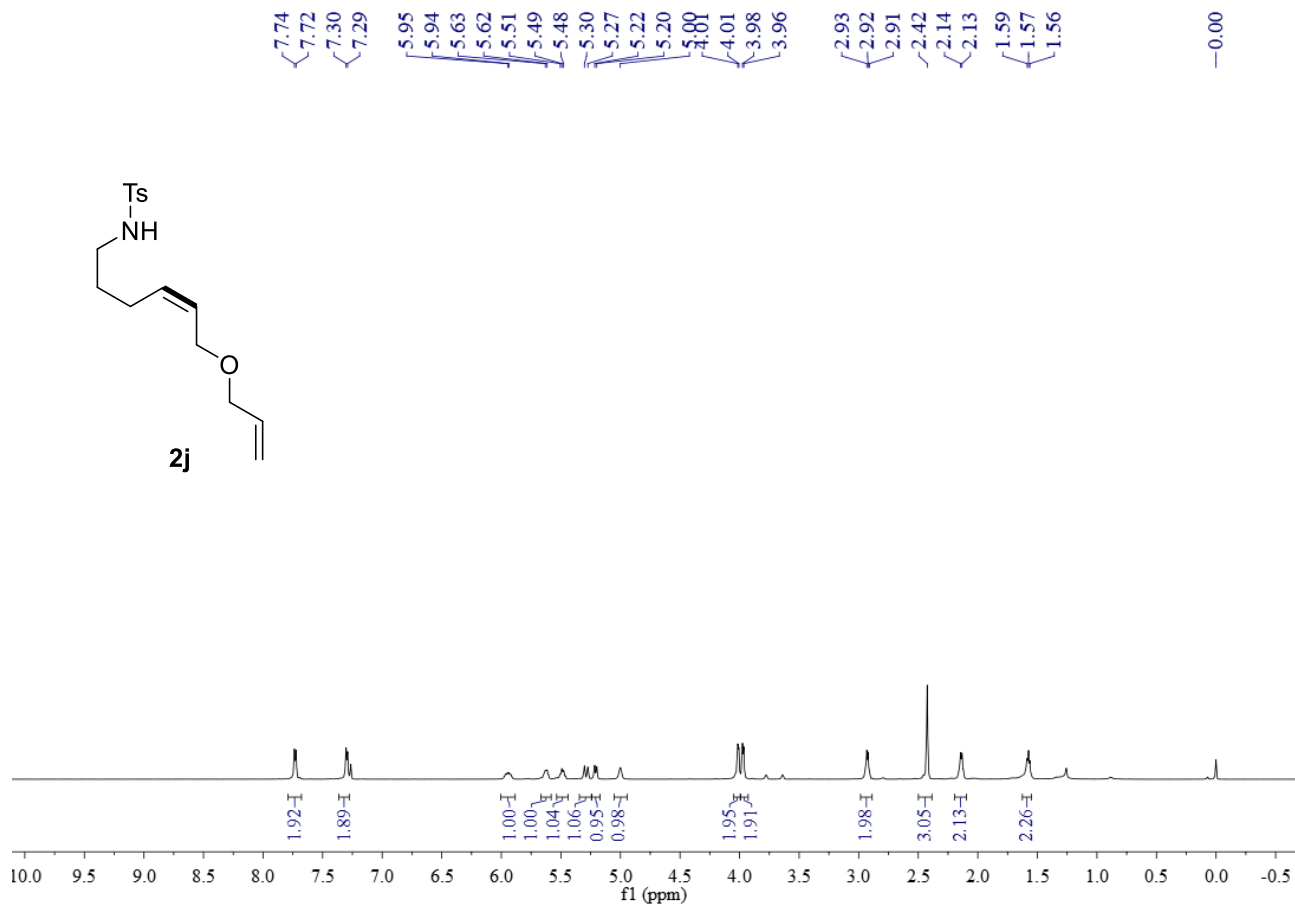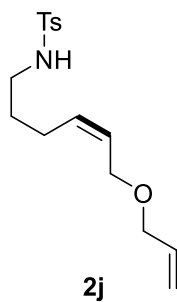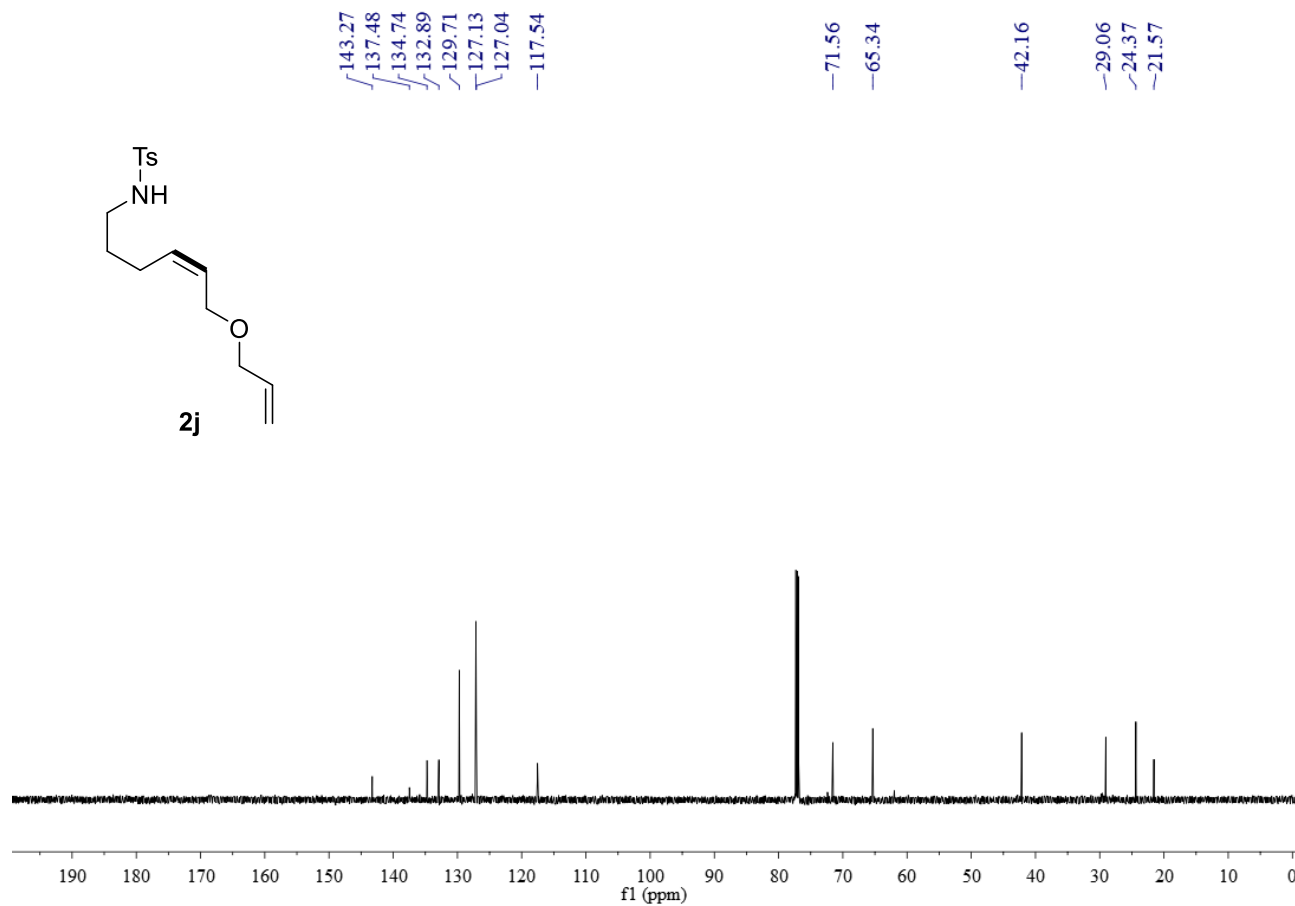

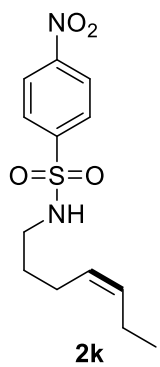

8.38, 8.36, 8.06, 8.05, 5.42, 5.41, 5.39, 5.38, 5.24, 5.22, 5.21, 5.19, 4.65, 3.05, 3.04, 3.03, 3.02, 2.05, 2.03, 1.98, 1.57, 1.56, 0.94, 0.93, 0.92, -0.00

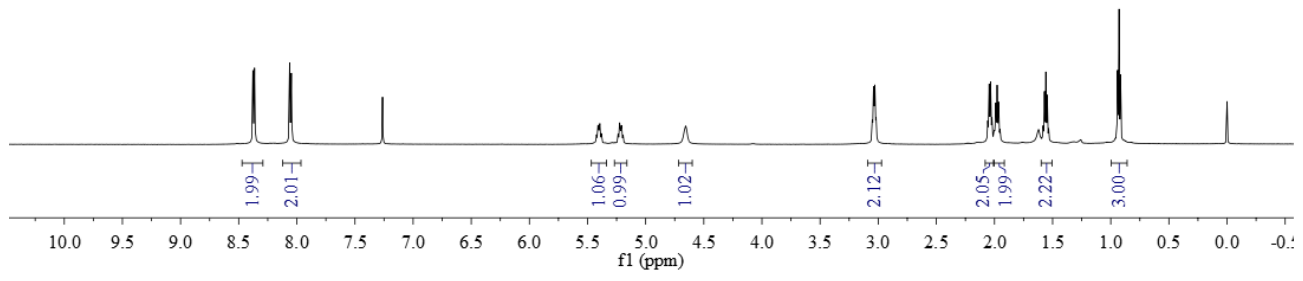

150.20, 146.20, 133.44, 128.36, 126.99, 124.48, 77.31, 77.10, 76.89, 43.20, 29.73, 24.19, 20.63, 14.27

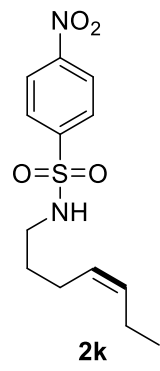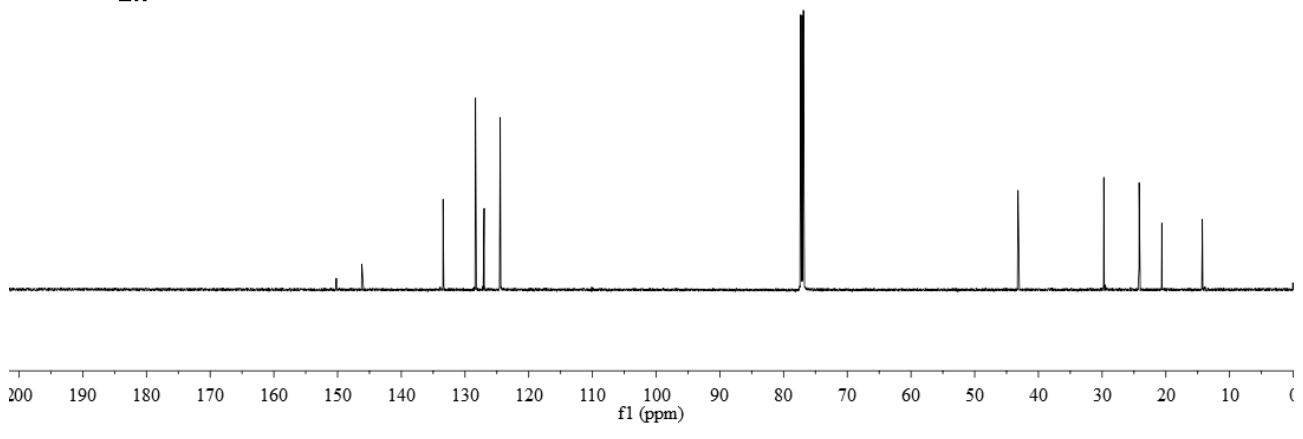

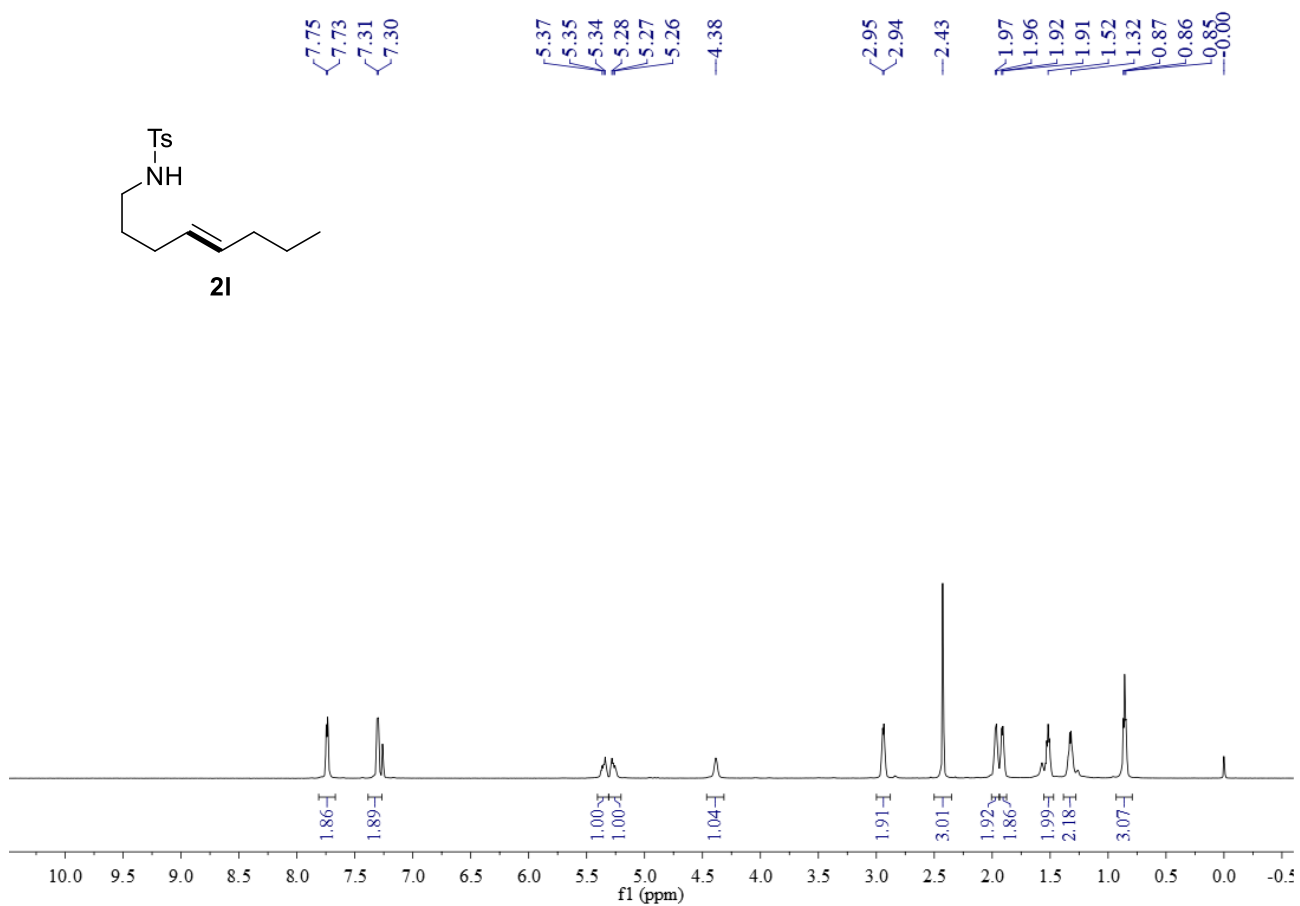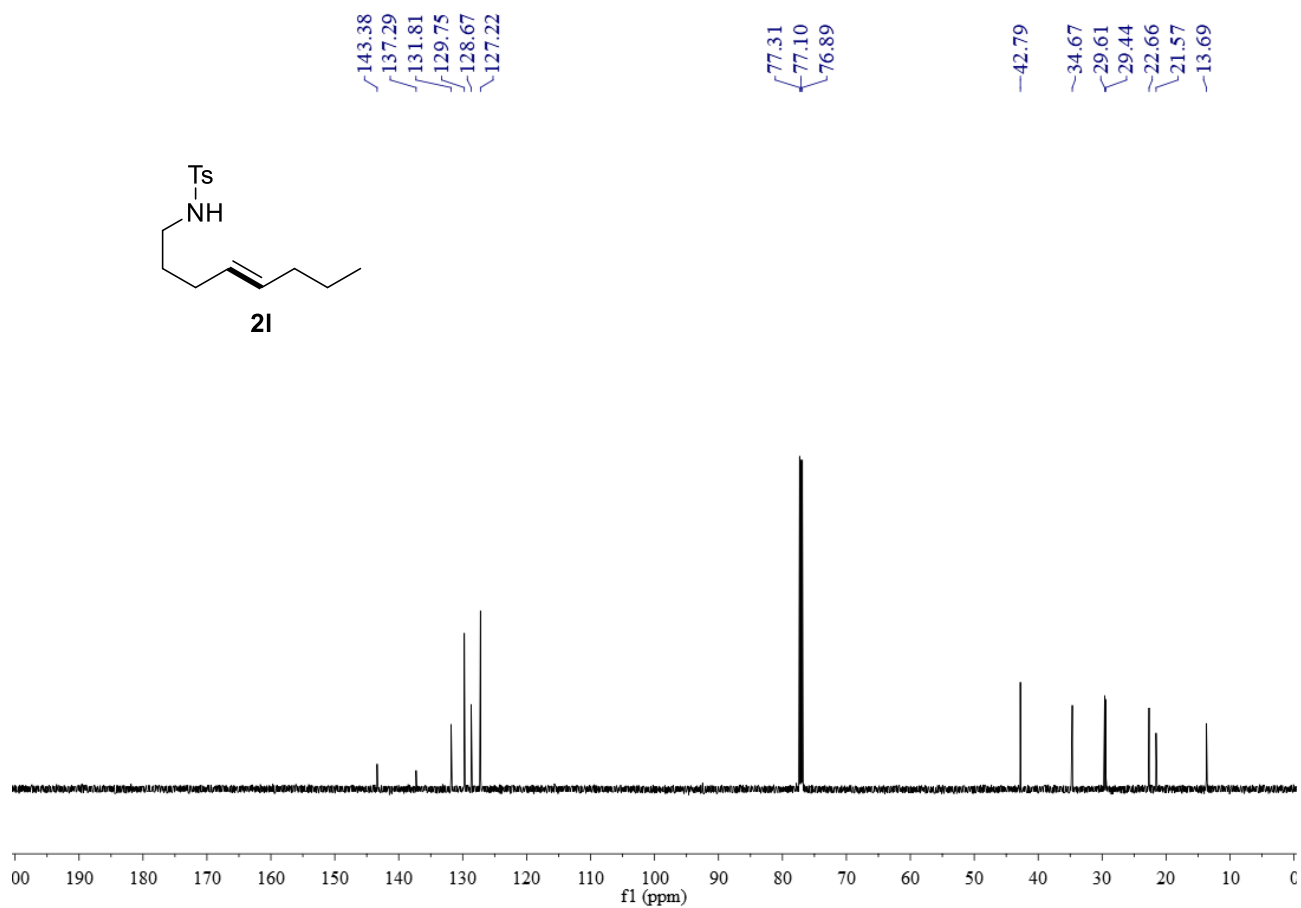

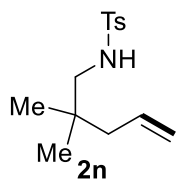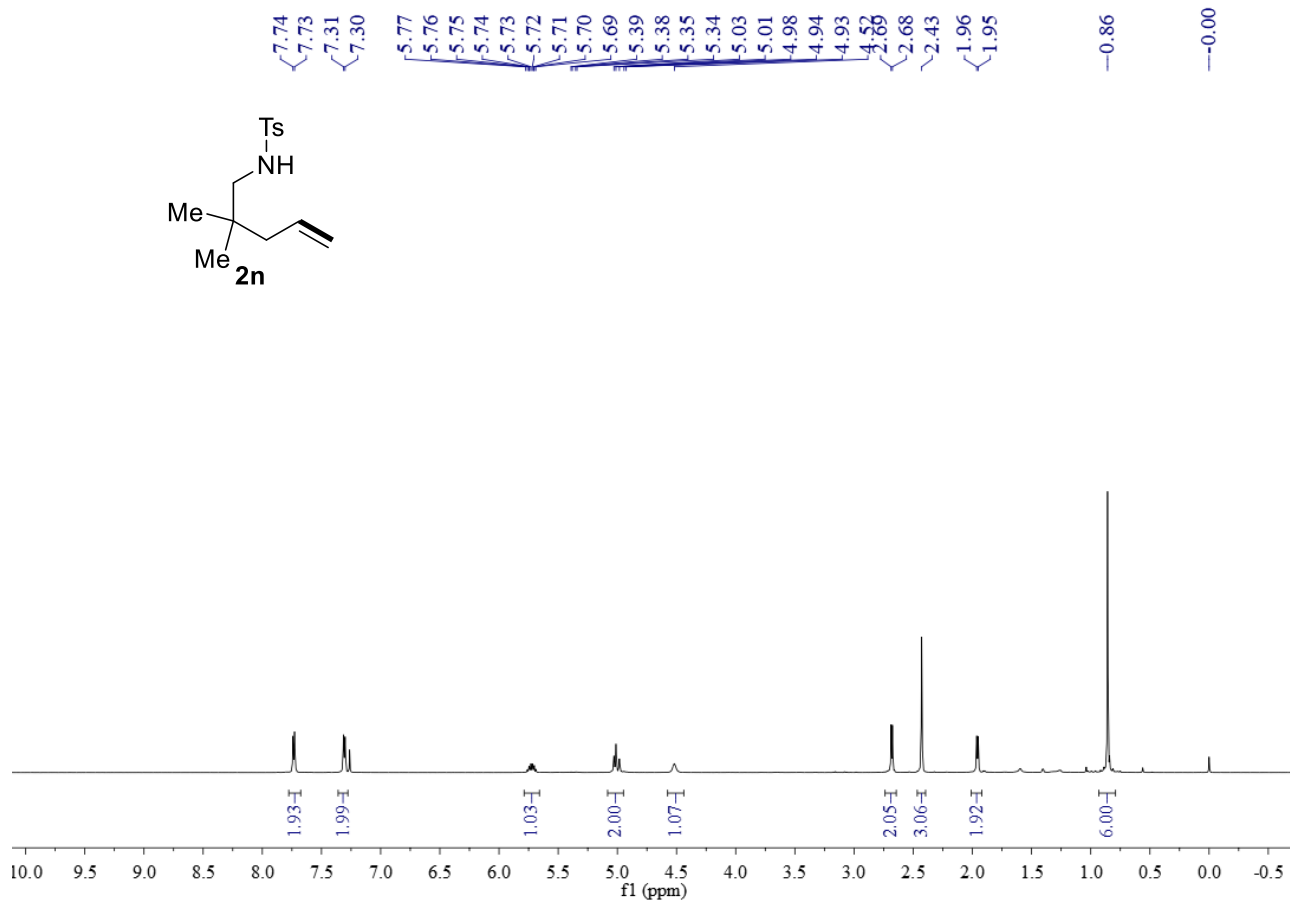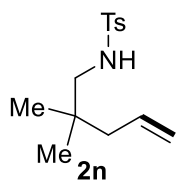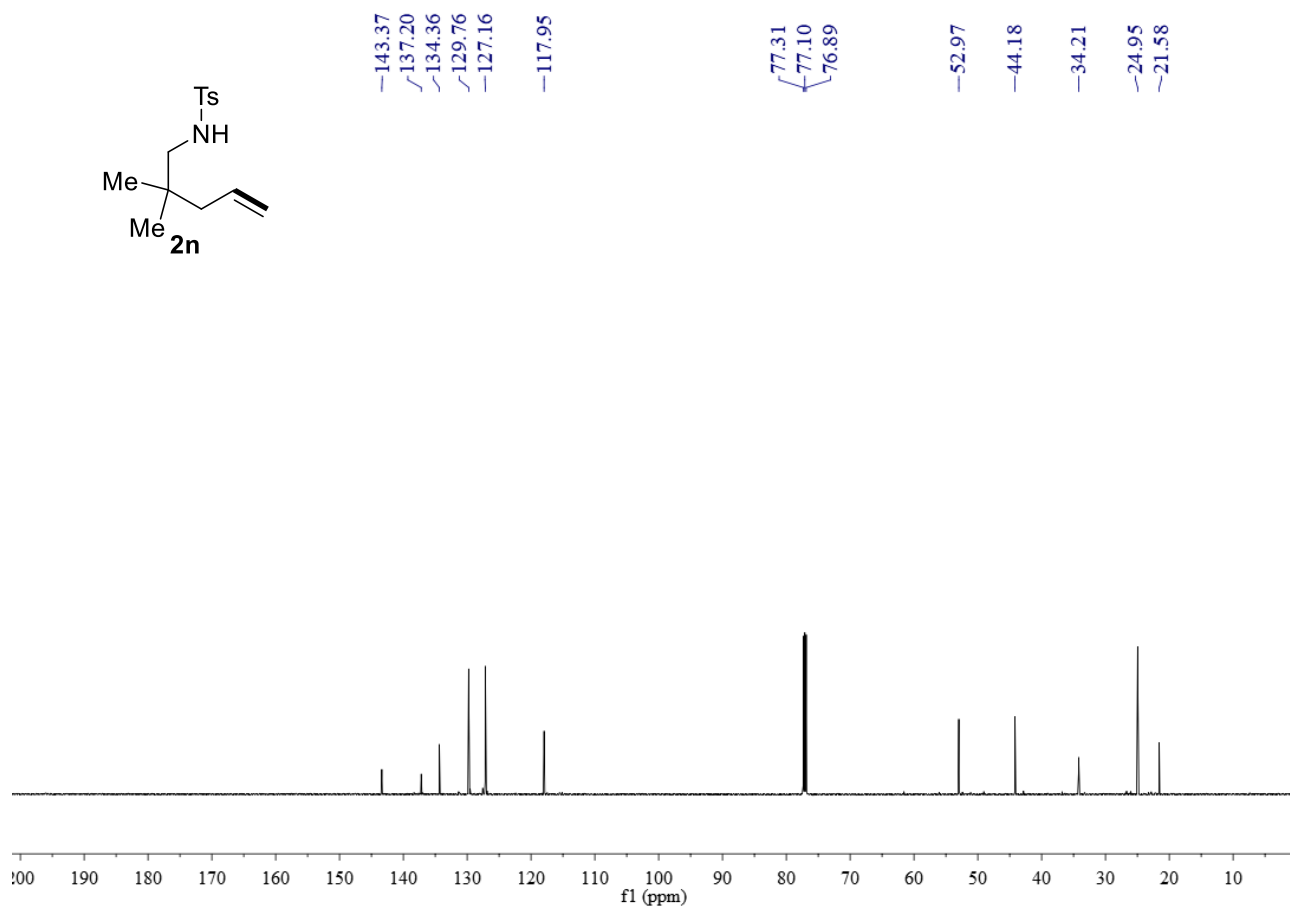

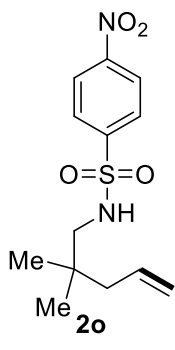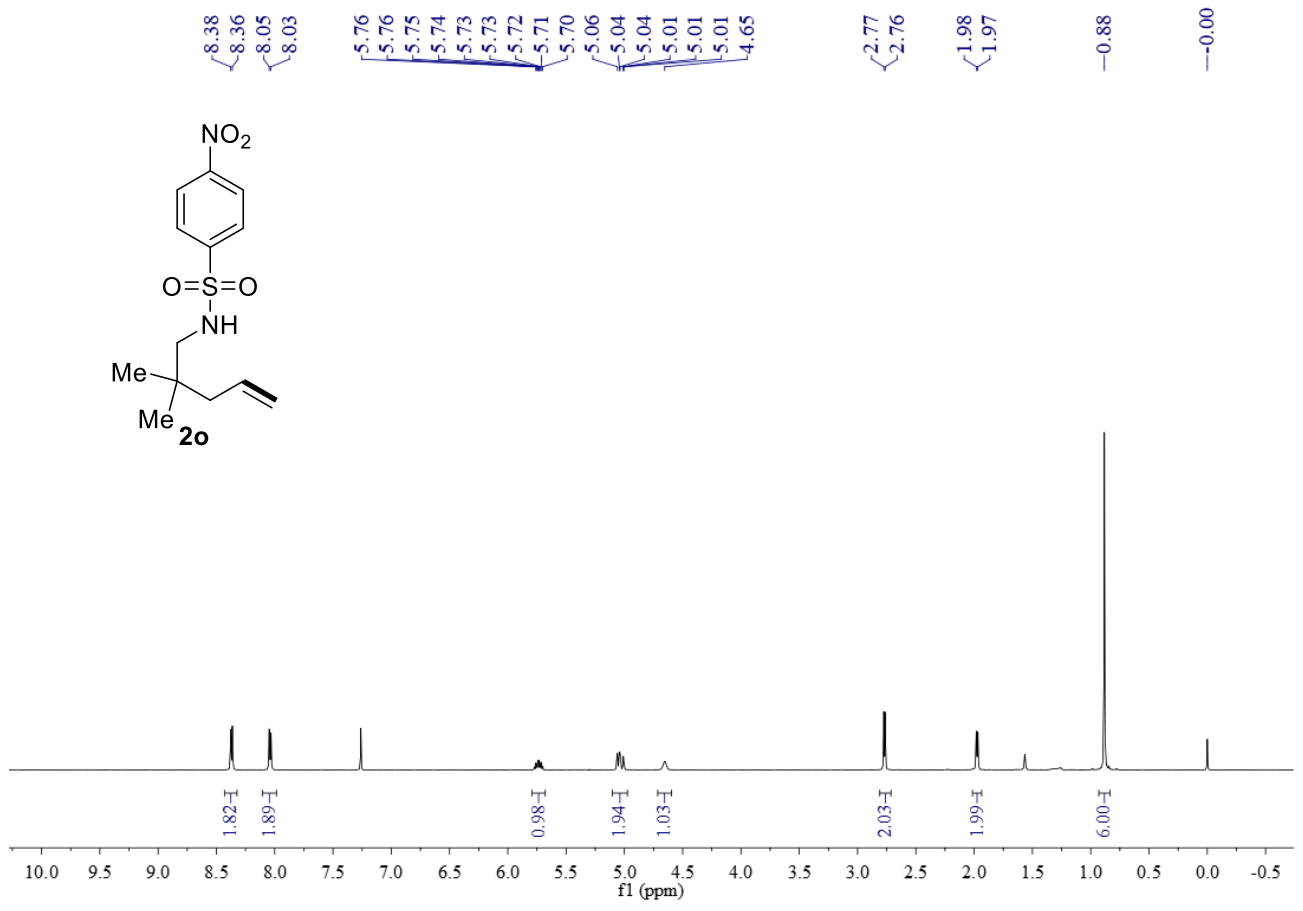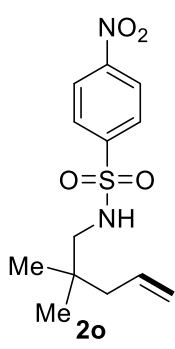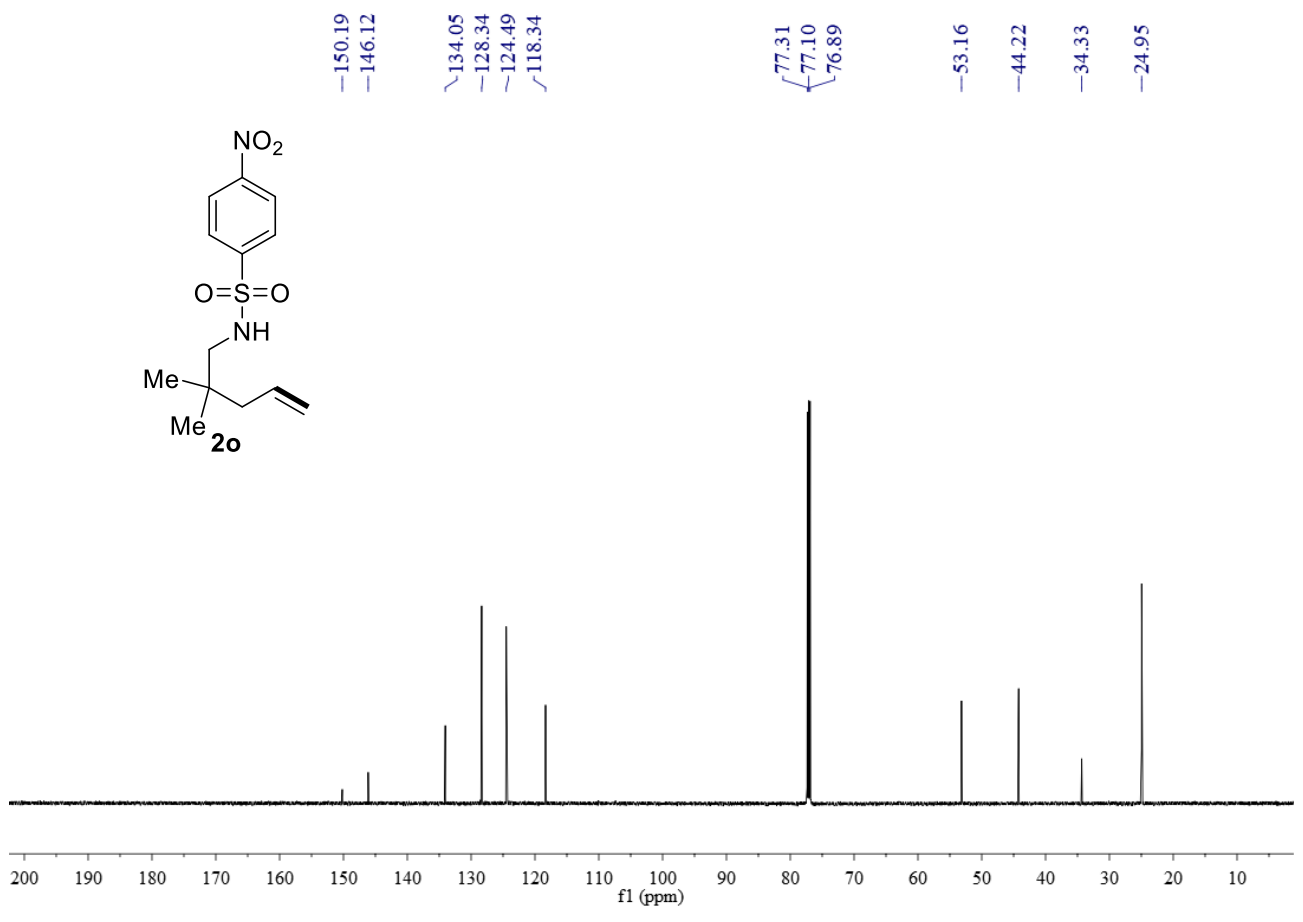

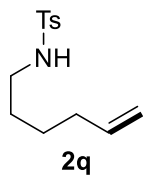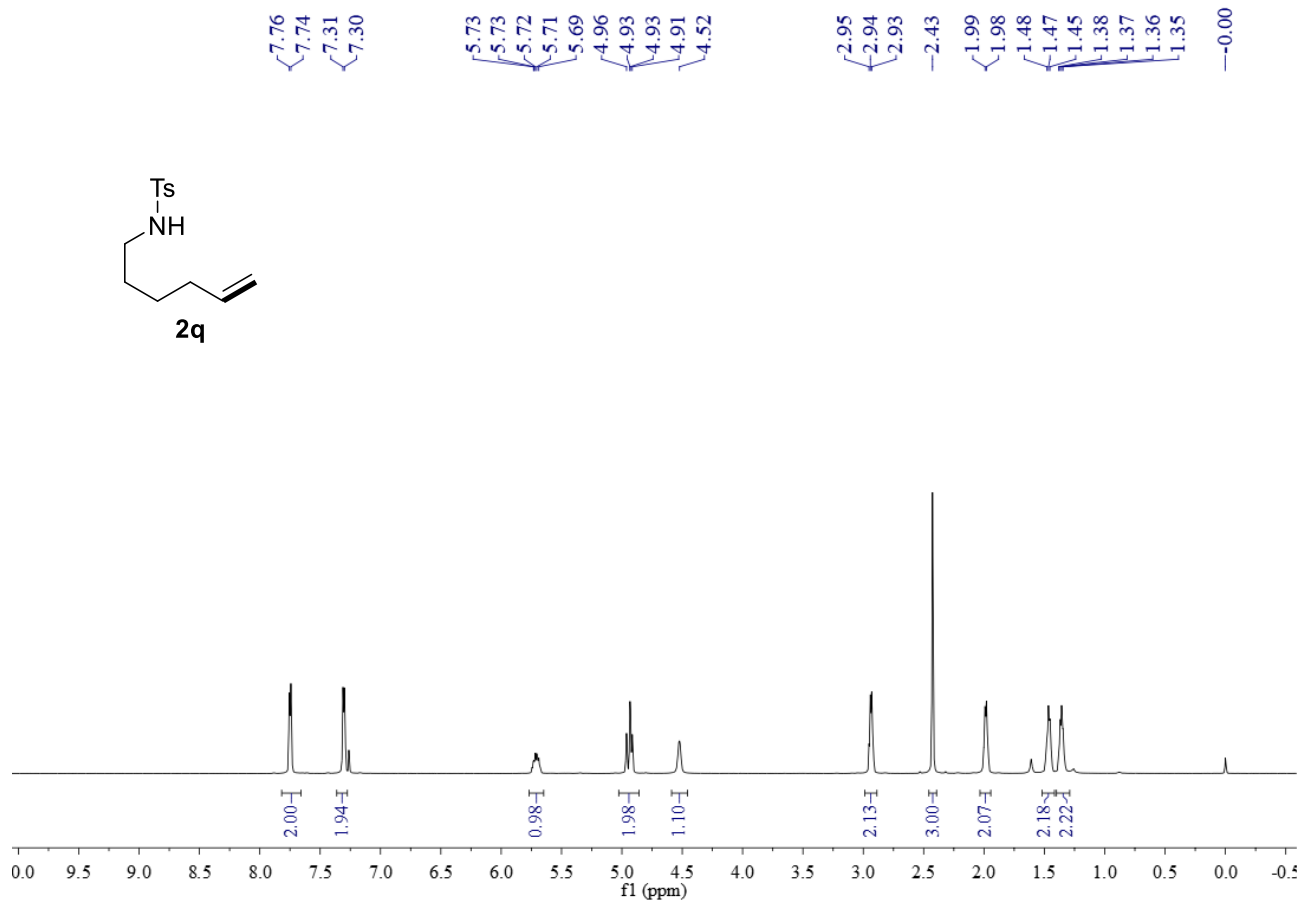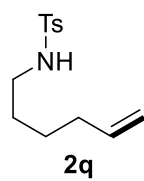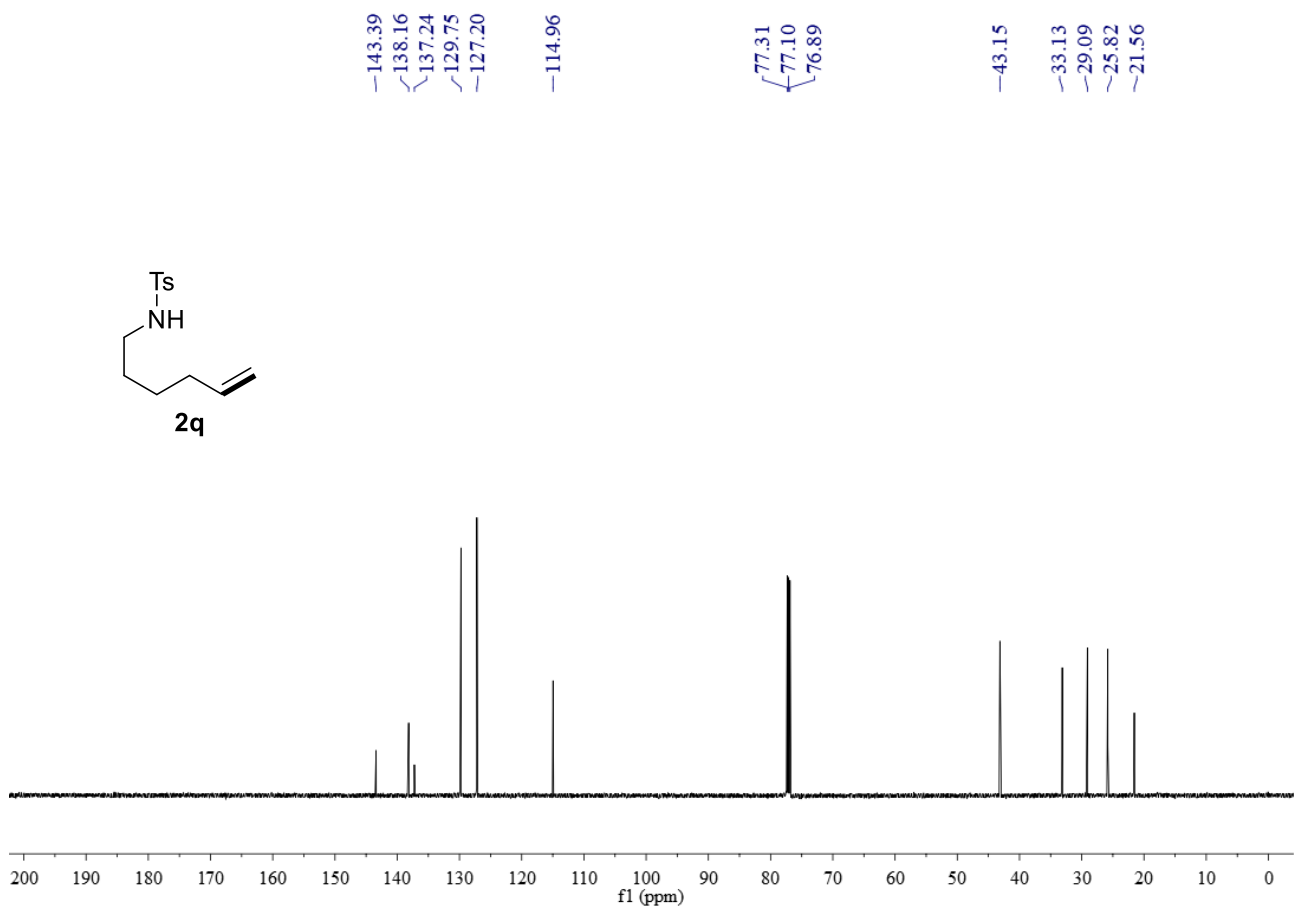

## 9.2. NMR and HPLC of the Products 3-6

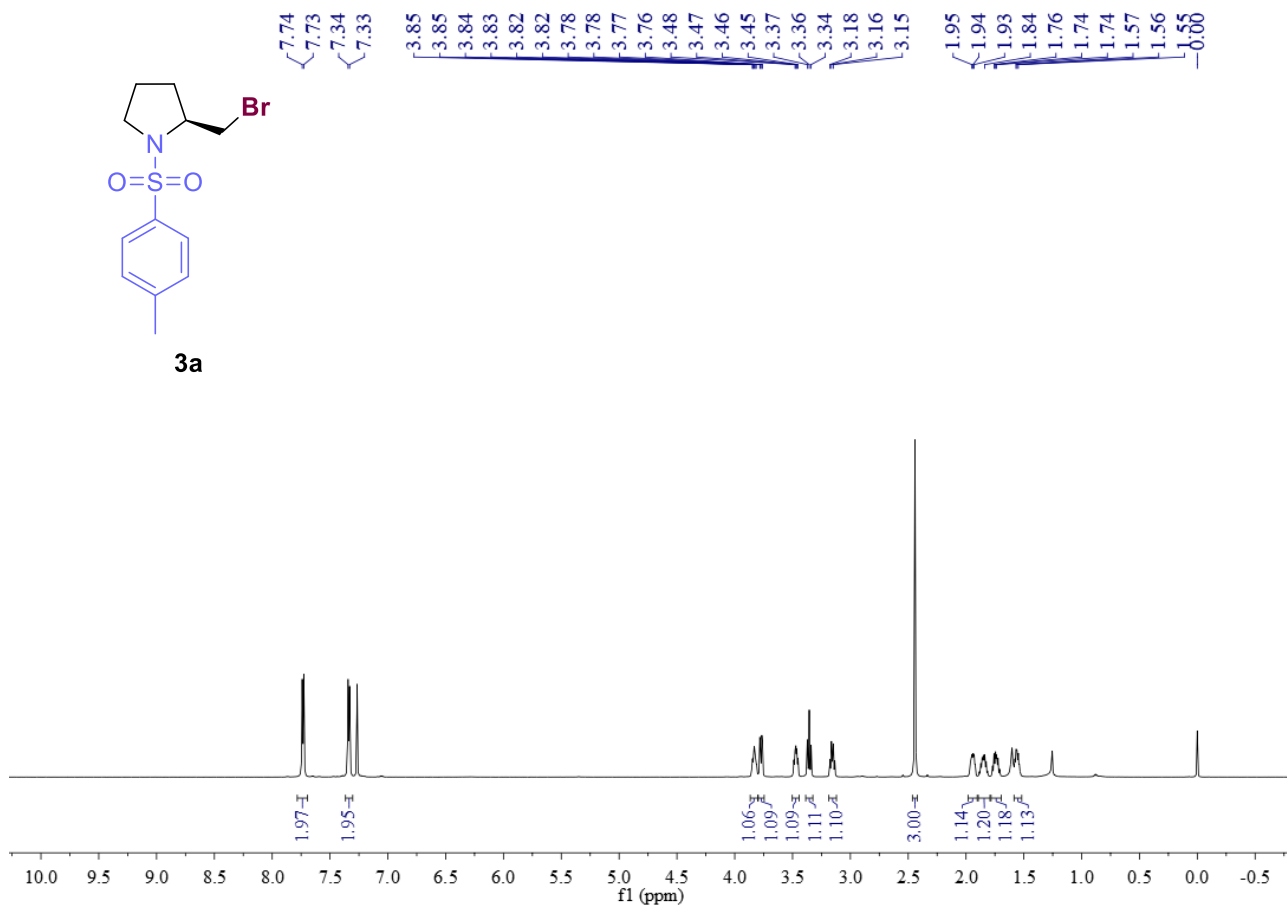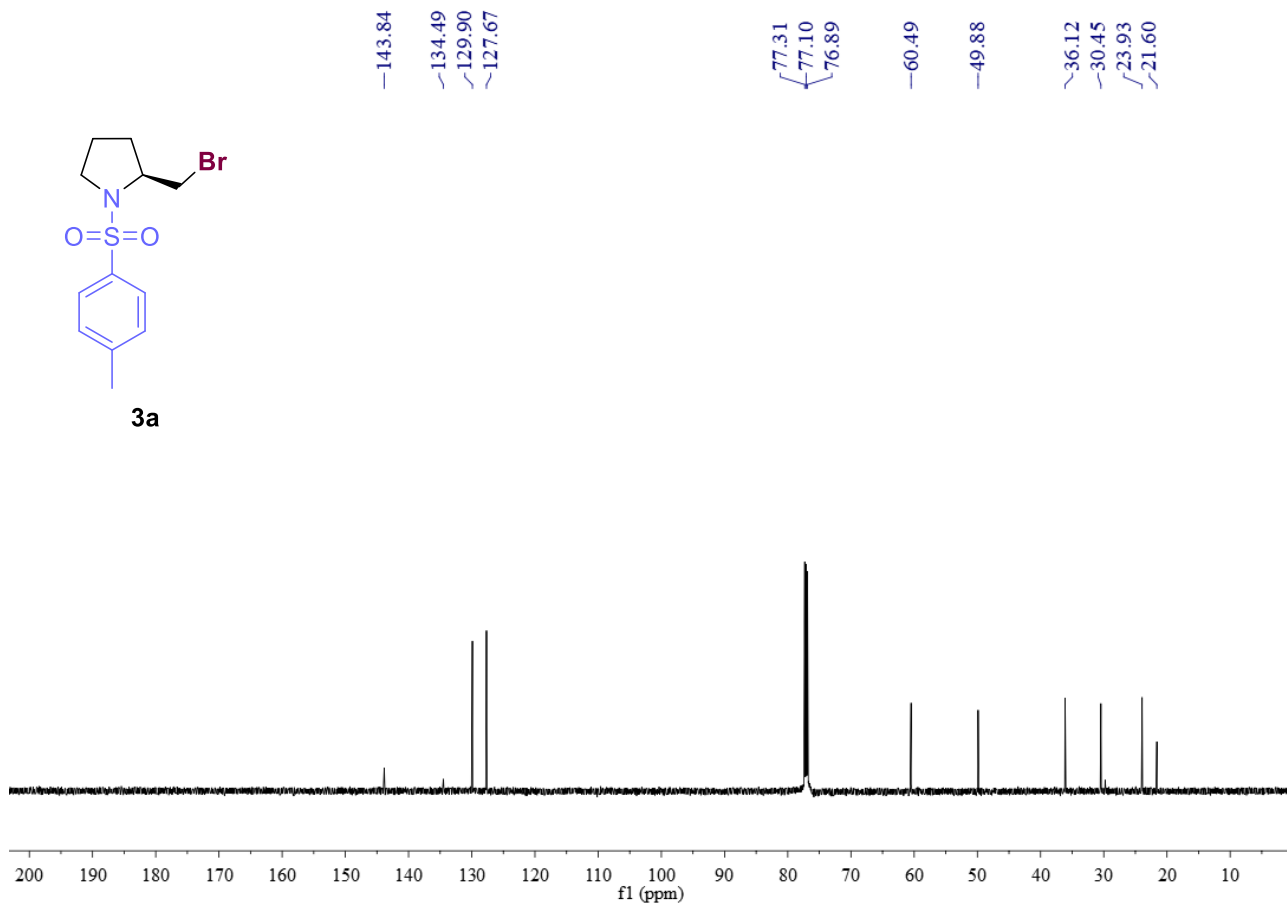



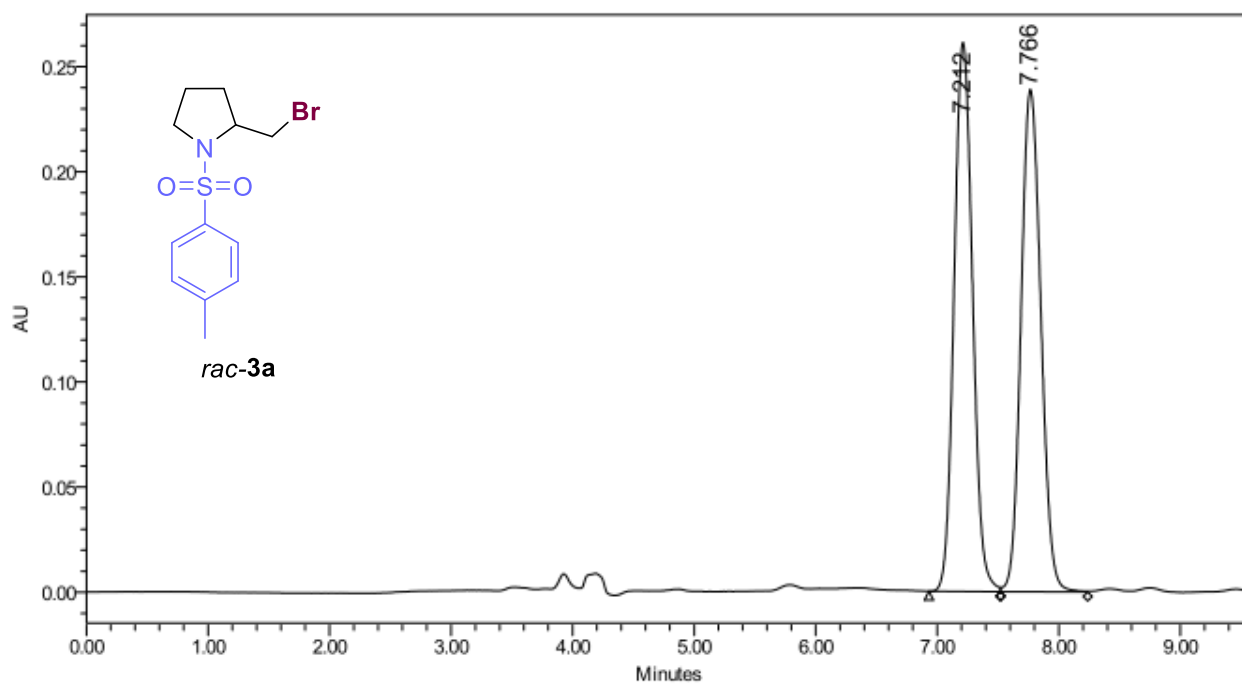

|   | RT (min) | Peak Type | Area ( $\mu\text{V}\cdot\text{sec}$ ) | % Area | Height ( $\mu\text{V}$ ) | % Height | Integration Type | Points Across Peak | Start Time (min) | End Time (min) |
|---|----------|-----------|---------------------------------------|--------|--------------------------|----------|------------------|--------------------|------------------|----------------|
| 1 | 7.212    | Unknown   | 2754123                               | 50.34  | 261164                   | 52.23    | BV               | 354                | 6.932            | 7.522          |
| 2 | 7.766    | Unknown   | 2716646                               | 49.66  | 238854                   | 47.77    | VV               | 430                | 7.522            | 8.238          |

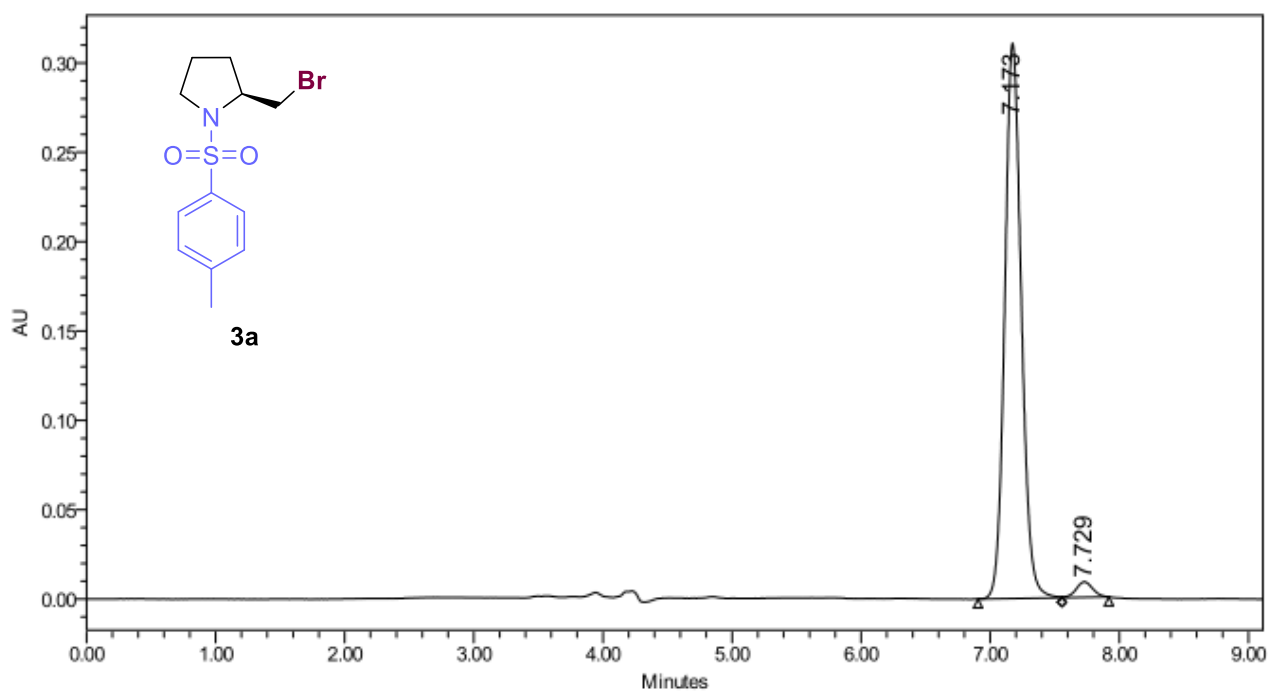

|   | RT (min) | Peak Type | Area ( $\mu\text{V}\cdot\text{sec}$ ) | % Area | Height ( $\mu\text{V}$ ) | % Height | Integration Type | Points Across Peak | Start Time (min) | End Time (min) |
|---|----------|-----------|---------------------------------------|--------|--------------------------|----------|------------------|--------------------|------------------|----------------|
| 1 | 7.173    | Unknown   | 2770574                               | 97.26  | 310760                   | 97.29    | BV               | 390                | 6.905            | 7.555          |
| 2 | 7.729    | Unknown   | 77923                                 | 2.74   | 8655                     | 2.71     | Vb               | 218                | 7.555            | 7.918          |

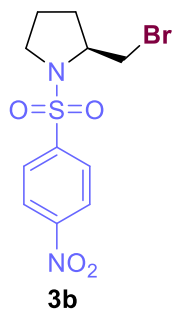

8.41, 8.40, 8.06, 8.05, -7.27, 3.92, 3.90, 3.89, 3.75, 3.73, 3.55, 3.54, 3.53, 3.52, 3.51, 3.44, 3.42, 3.40, 3.23, 3.22, 3.21, 3.19, 2.03, 2.02, 2.01, 1.94, 1.93, 1.83, 1.82, 1.81, 1.66, 1.65, 1.64, 0.00

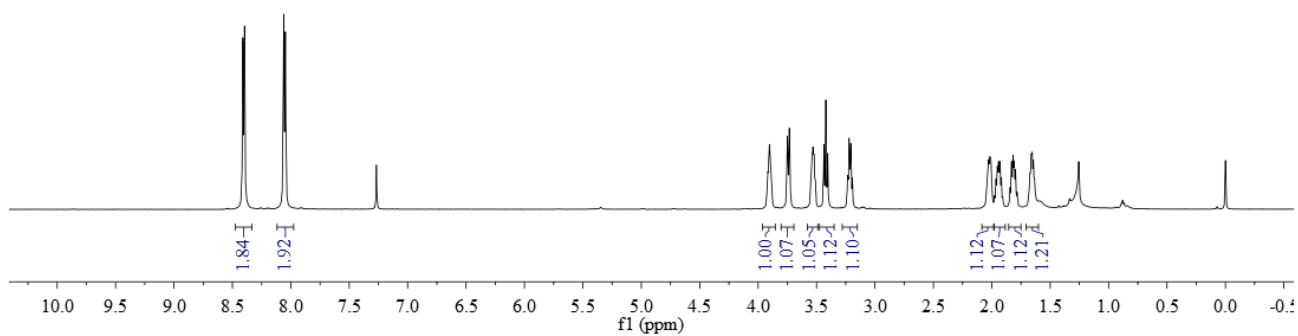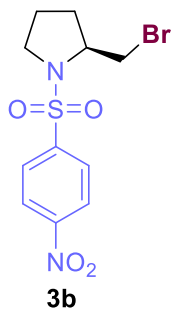

-150.41, -143.41, -128.71, -124.54, 77.31, 77.10, 76.89, -60.69, -49.93, 35.60, 30.46, 24.01

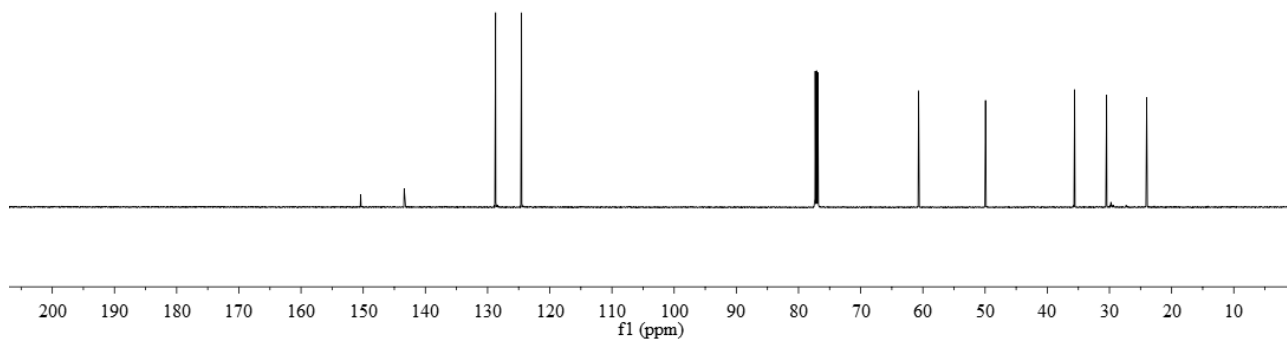

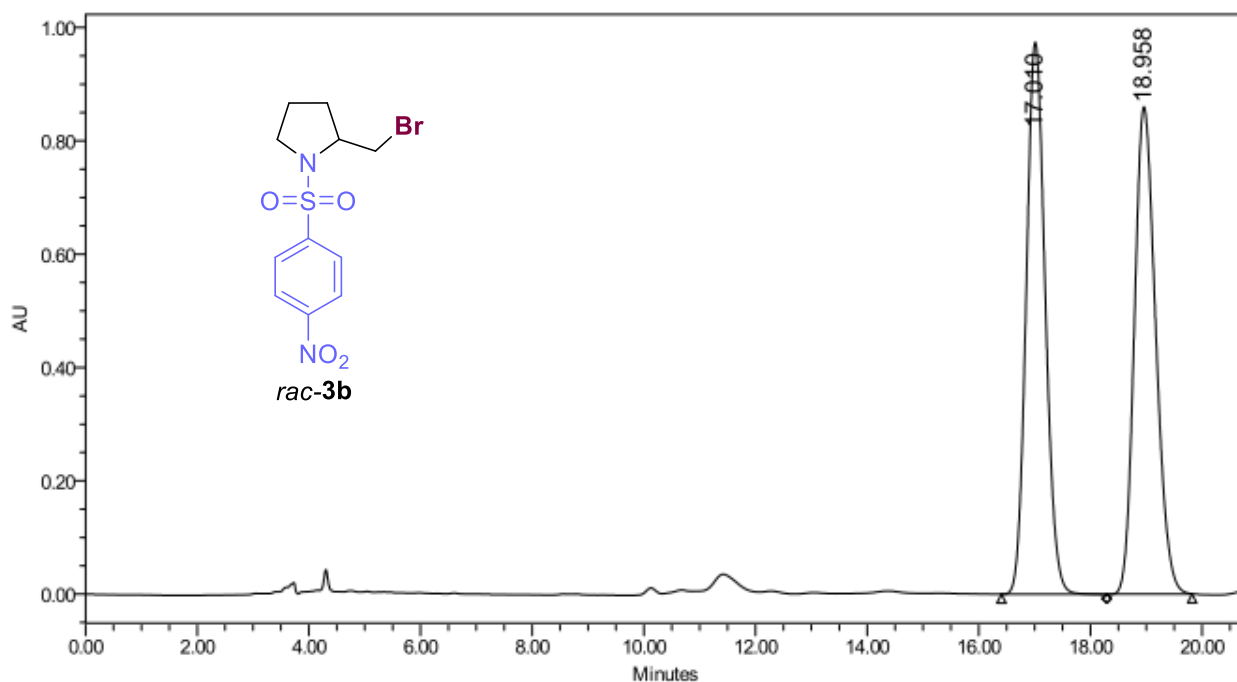

|   | RT (min) | Peak Type | Area ( $\mu\text{V}\cdot\text{sec}$ ) | % Area | Height ( $\mu\text{V}$ ) | % Height | Integration Type | Points Across Peak | Start Time (min) | End Time (min) |
|---|----------|-----------|---------------------------------------|--------|--------------------------|----------|------------------|--------------------|------------------|----------------|
| 1 | 17.010   | Unknown   | 22977601                              | 50.19  | 974305                   | 53.13    | BV               | 1133               | 16.403           | 18.292         |
| 2 | 18.958   | Unknown   | 22803197                              | 49.81  | 859508                   | 46.87    | Vb               | 917                | 18.292           | 19.820         |

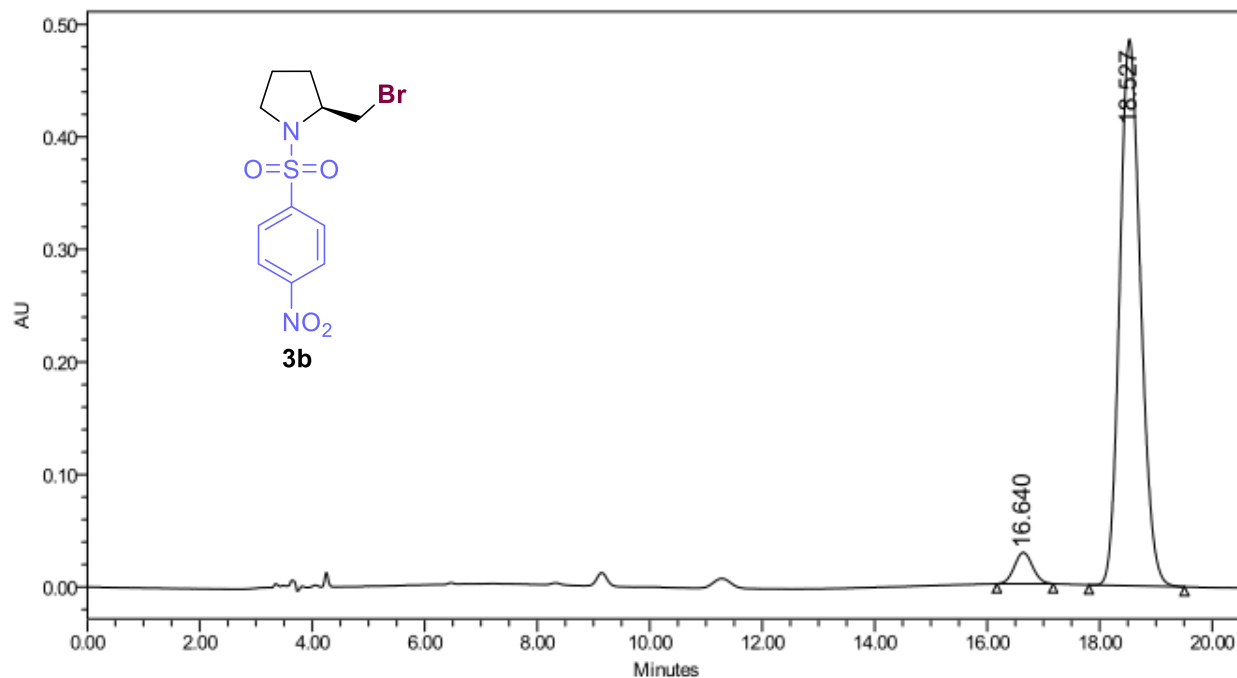

|   | RT (min) | Peak Type | Area ( $\mu\text{V}\cdot\text{sec}$ ) | % Area | Height ( $\mu\text{V}$ ) | % Height | Integration Type | Points Across Peak | Start Time (min) | End Time (min) |
|---|----------|-----------|---------------------------------------|--------|--------------------------|----------|------------------|--------------------|------------------|----------------|
| 1 | 16.640   | Unknown   | 626426                                | 4.76   | 27689                    | 5.39     | bb               | 599                | 16.173           | 17.172         |
| 2 | 18.527   | Unknown   | 12541441                              | 95.24  | 485641                   | 94.61    | bb               | 1020               | 17.807           | 19.507         |

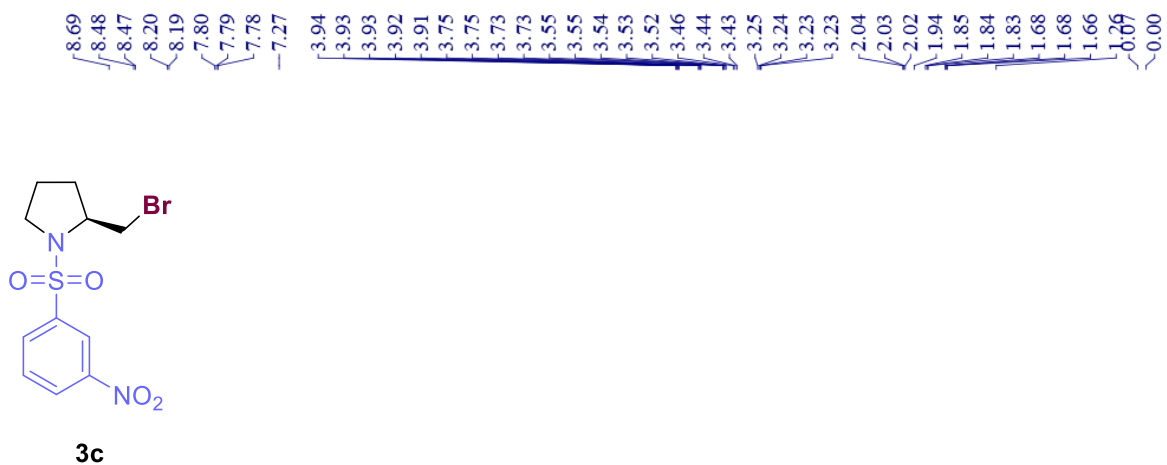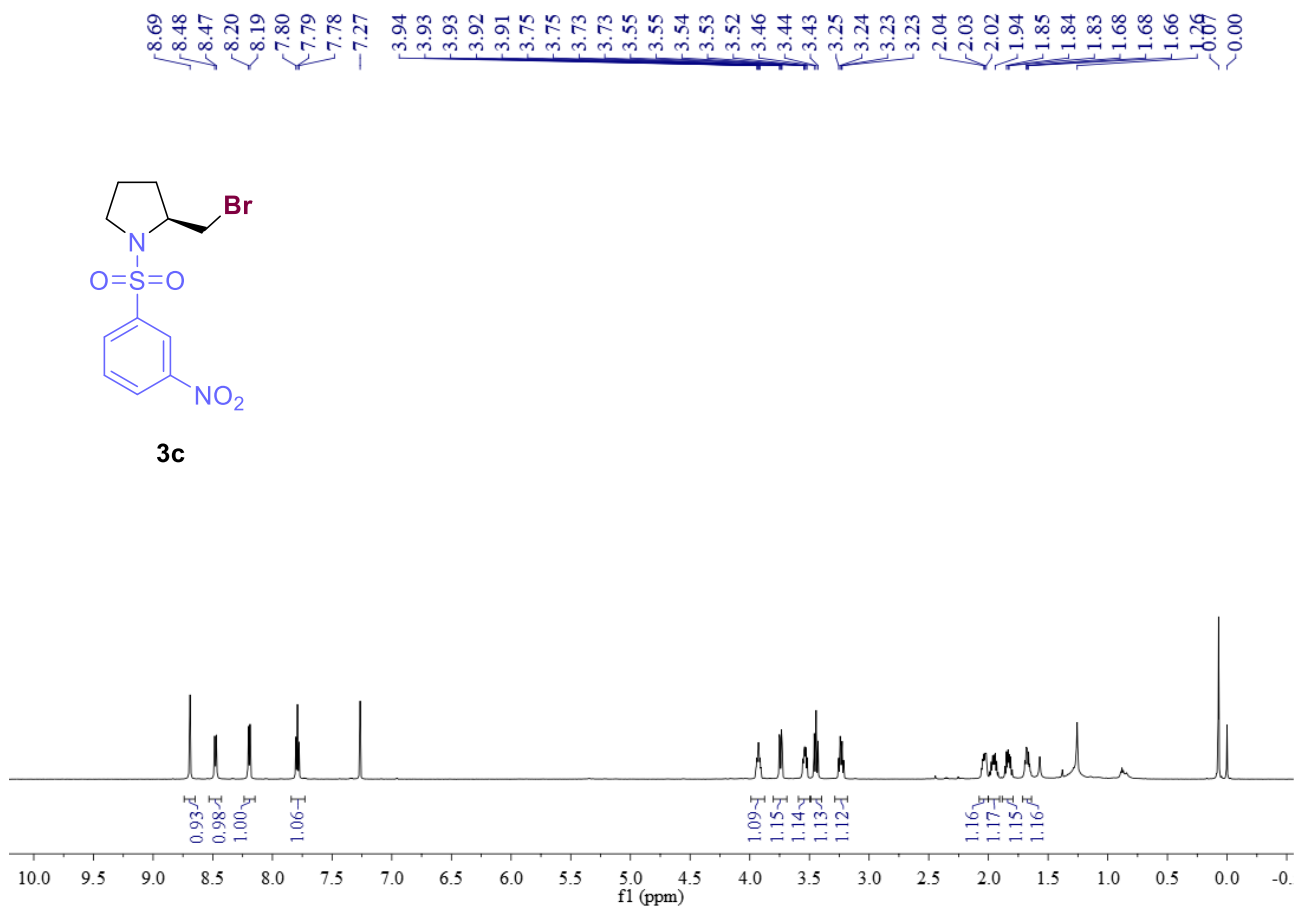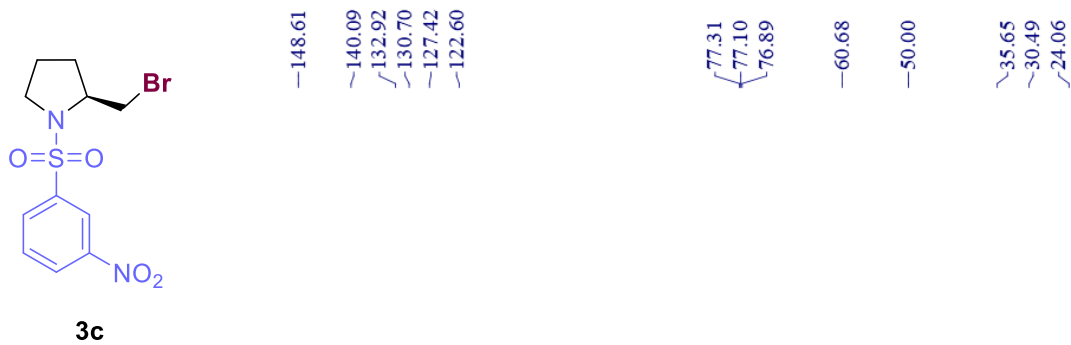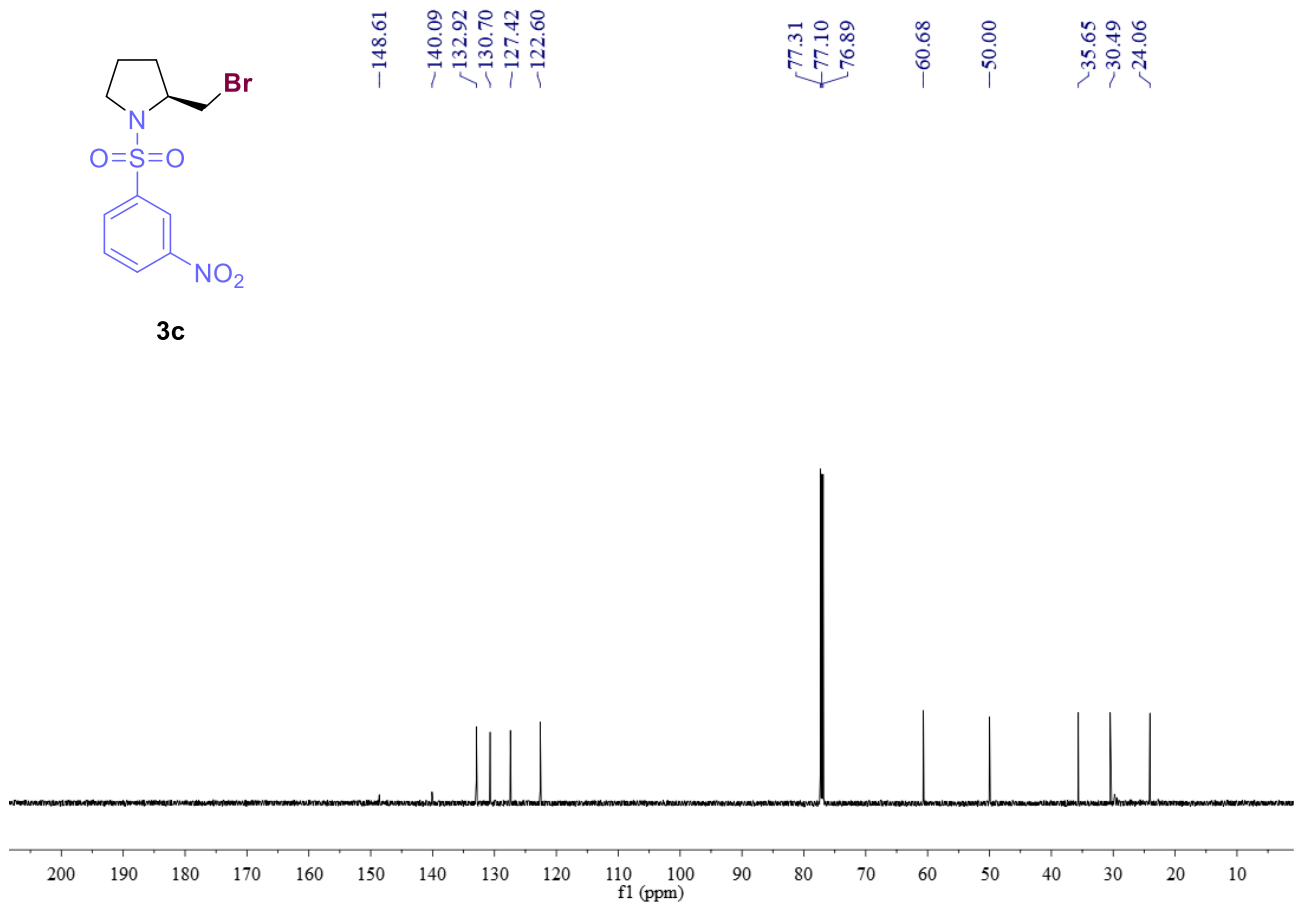

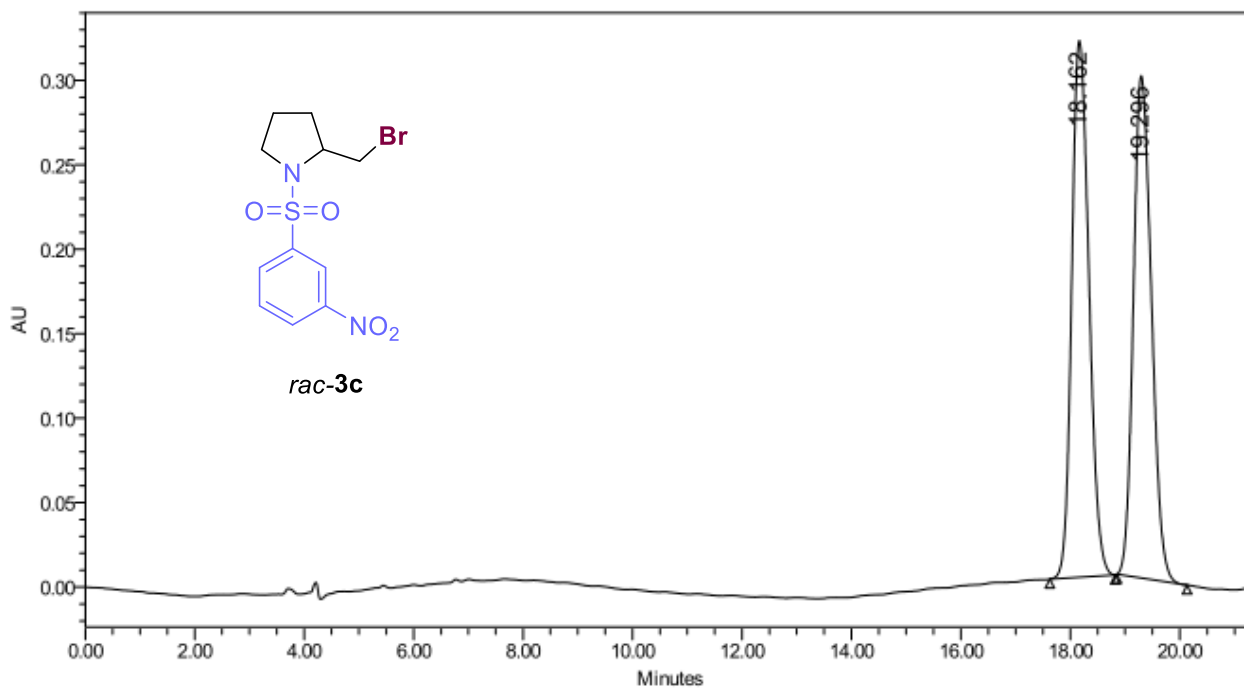

|   | RT (min) | Peak Type | Area ( $\mu\text{V}\cdot\text{sec}$ ) | % Area | Height ( $\mu\text{V}$ ) | % Height | Integration Type | Points Across Peak | Start Time (min) | End Time (min) |
|---|----------|-----------|---------------------------------------|--------|--------------------------|----------|------------------|--------------------|------------------|----------------|
| 1 | 18.162   | Unknown   | 6932889                               | 50.45  | 317655                   | 51.65    | bb               | 718                | 17.623           | 18.820         |
| 2 | 19.296   | Unknown   | 6809223                               | 49.55  | 297384                   | 48.35    | bb               | 769                | 18.850           | 20.132         |

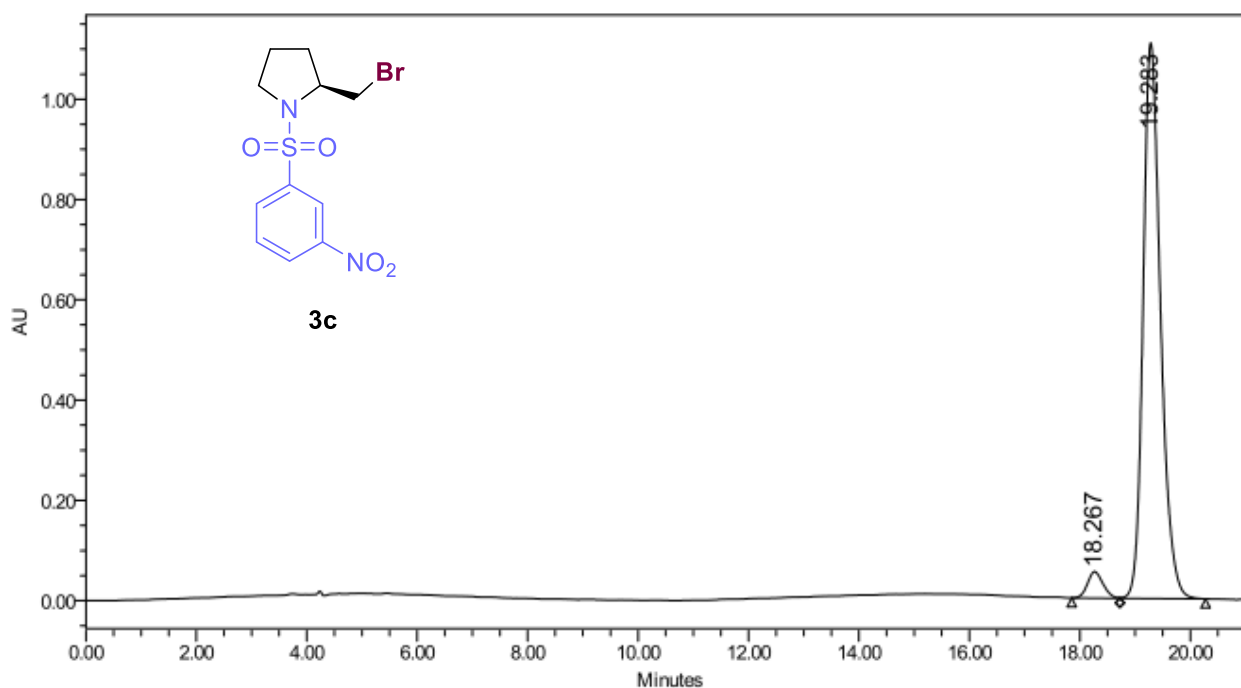

|   | RT (min) | Peak Type | Area ( $\mu\text{V}\cdot\text{sec}$ ) | % Area | Height ( $\mu\text{V}$ ) | % Height | Integration Type | Points Across Peak | Start Time (min) |
|---|----------|-----------|---------------------------------------|--------|--------------------------|----------|------------------|--------------------|------------------|
| 1 | 18.267   | Unknown   | 1033428                               | 4.08   | 52859                    | 4.55     | bV               | 523                | 17.853           |
| 2 | 19.283   | Unknown   | 24267039                              | 95.92  | 1108063                  | 95.45    | VB               | 931                | 18.725           |

8.05  
8.04  
7.74  
7.74  
7.73  
7.72  
7.72  
7.71  
7.70  
7.69  
7.63  
7.63  
7.62  
4.24  
4.23  
4.23  
3.67  
3.67  
3.66  
3.65  
3.54  
3.53  
3.53  
3.52  
3.52  
3.52  
3.50  
3.47  
3.46  
3.45  
3.45  
3.42  
3.40  
3.38  
2.08  
2.08  
2.06  
2.05  
2.04  
2.03  
2.01  
2.00  
1.99  
1.98  
1.84  
1.83  
1.82  
1.81  
0.00

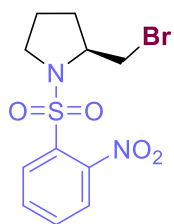

3d

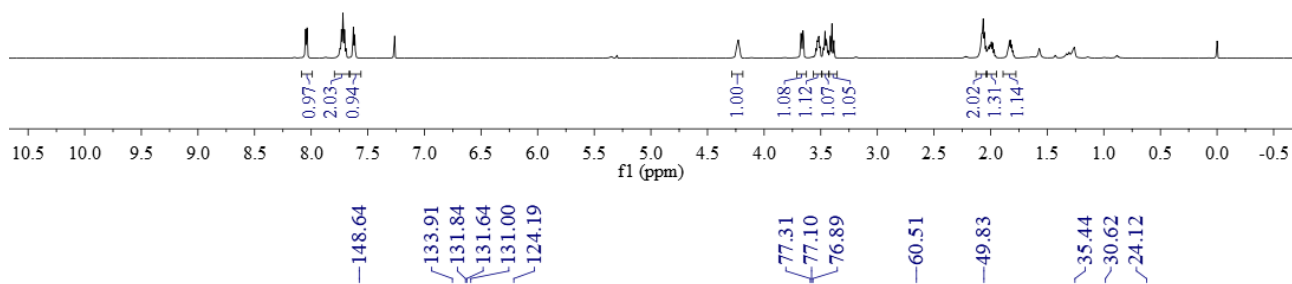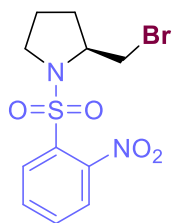

3d

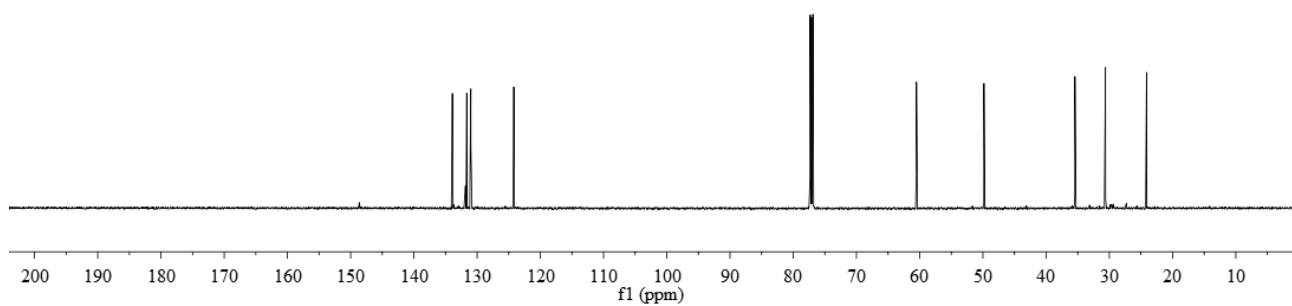

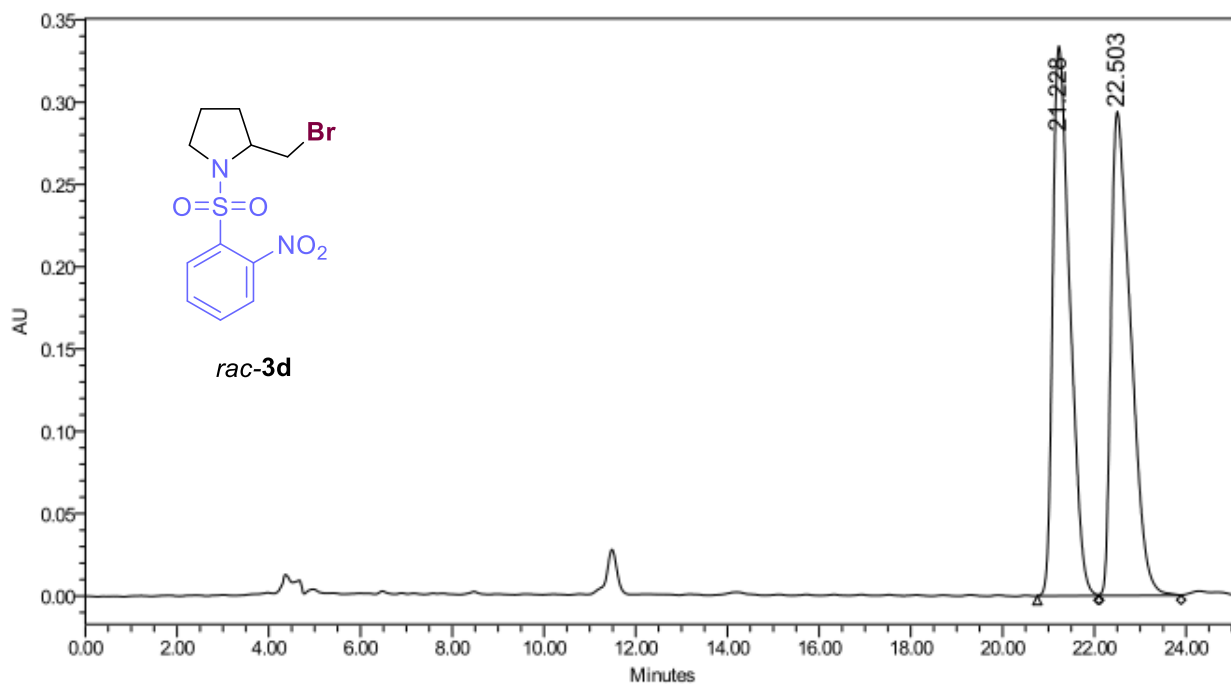

|   | RT (min) | Peak Type | Area ( $\mu\text{V}\cdot\text{sec}$ ) | % Area | Height ( $\mu\text{V}$ ) | % Height | Integration Type | Points Across Peak | Start Time (min) | End Time (min) |
|---|----------|-----------|---------------------------------------|--------|--------------------------|----------|------------------|--------------------|------------------|----------------|
| 1 | 21.228   | Unknown   | 8634985                               | 49.66  | 333875                   | 53.18    | BV               | 805                | 20.757           | 22.098         |
| 2 | 22.503   | Unknown   | 8752488                               | 50.34  | 293975                   | 46.82    | VV               | 1076               | 22.098           | 23.892         |

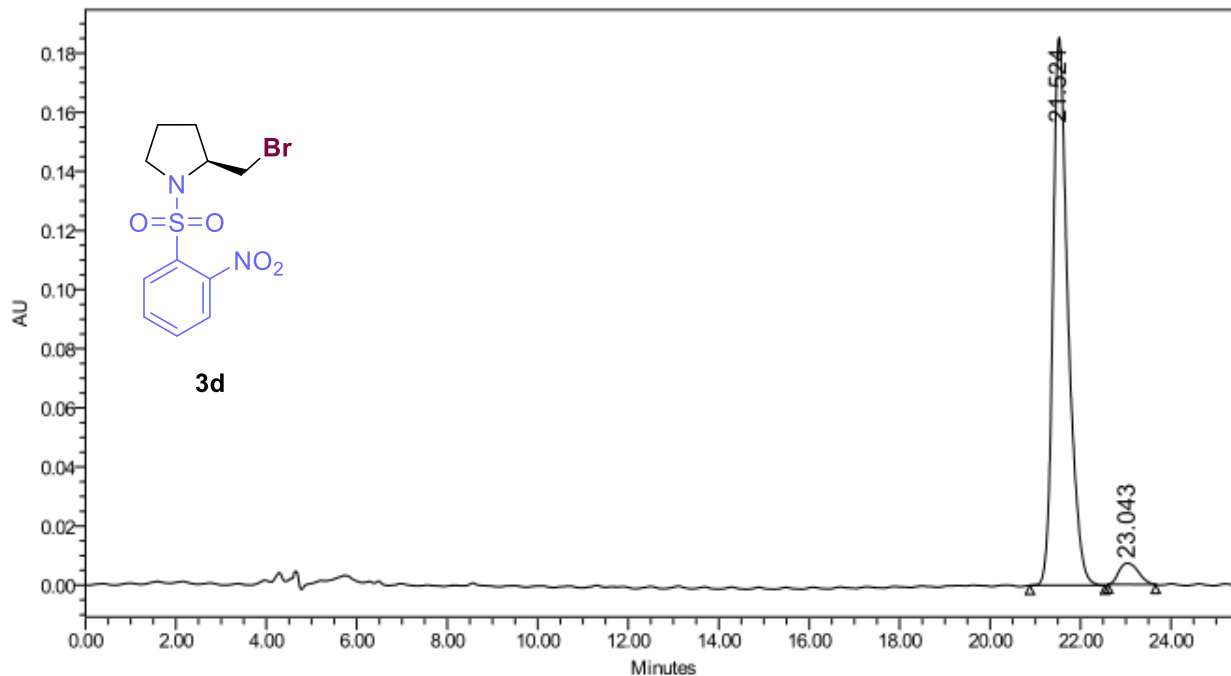

|   | RT (min) | Peak Type | Area ( $\mu\text{V}\cdot\text{sec}$ ) | % Area | Height ( $\mu\text{V}$ ) | % Height | Integration Type | Points Across Peak | Start Time (min) | End Time (min) |
|---|----------|-----------|---------------------------------------|--------|--------------------------|----------|------------------|--------------------|------------------|----------------|
| 1 | 21.524   | Unknown   | 4310338                               | 95.21  | 185400                   | 96.24    | bb               | 996                | 20.880           | 22.540         |
| 2 | 23.043   | Unknown   | 217015                                | 4.79   | 7250                     | 3.76     | bb               | 628                | 22.612           | 23.658         |

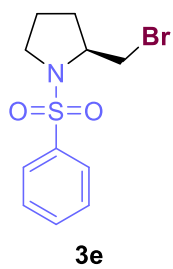

7.86  
 7.85  
 7.56  
 7.55  
 7.26

1.96  
 1.95  
 1.94  
 1.89  
 1.87  
 1.86  
 1.85  
 1.84  
 1.83  
 1.79  
 1.77  
 1.76  
 1.75  
 1.74  
 1.73  
 1.56  
 1.26  
 -0.00

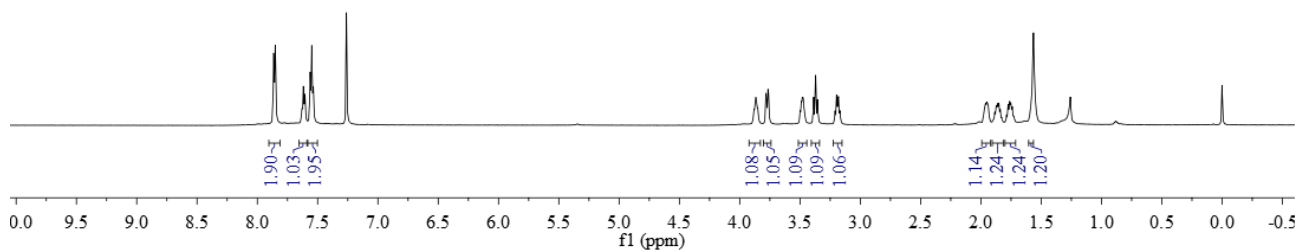

137.40  
 133.01  
 129.29  
 127.60

77.31  
 77.10  
 76.89  
 60.52  
 49.88  
 36.03  
 30.44  
 23.93

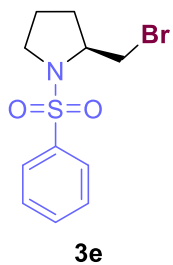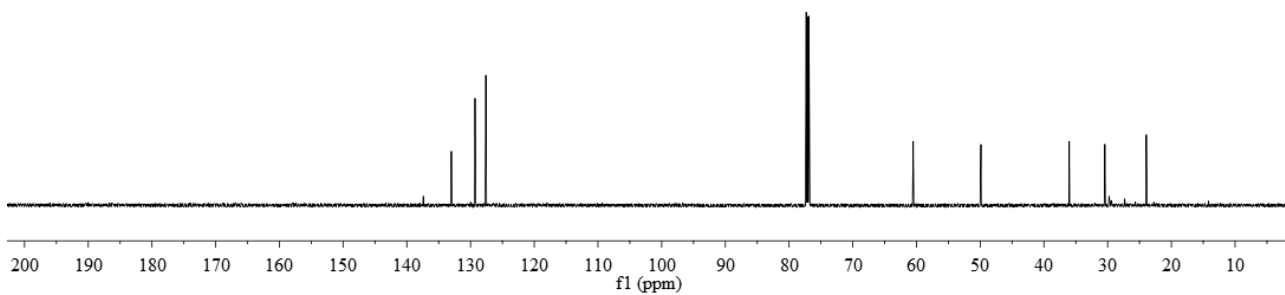



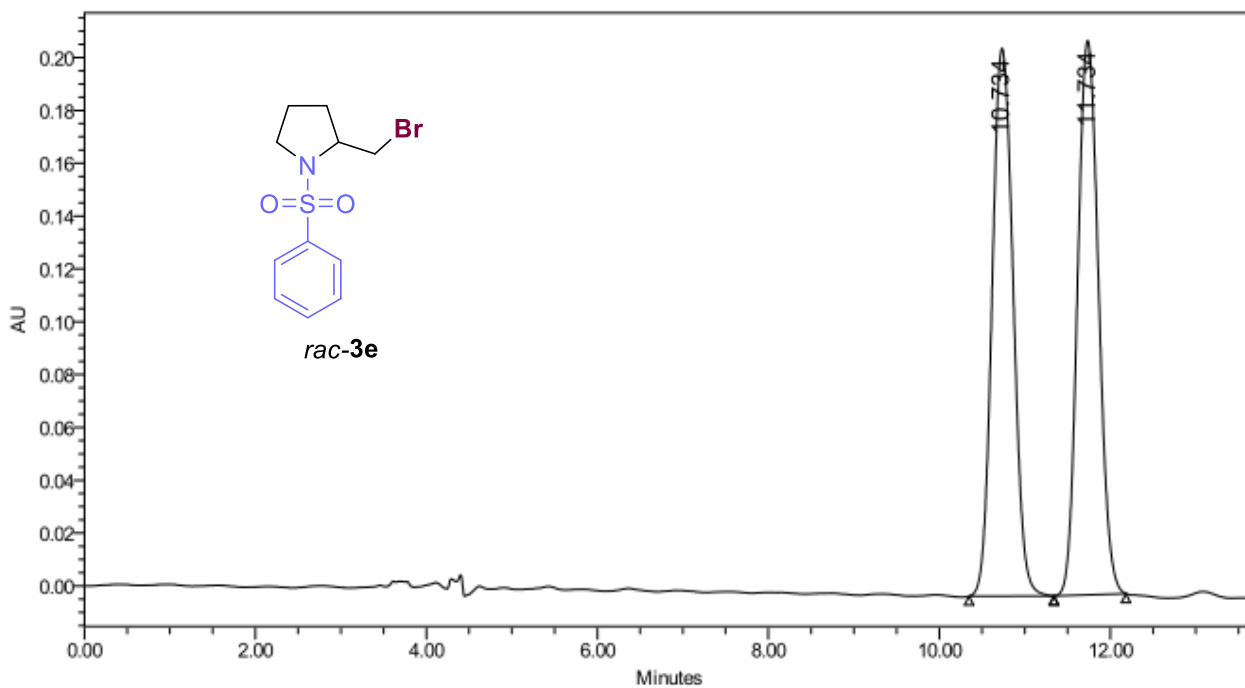

|   | RT (min) | Peak Type | Area ( $\mu\text{V}\cdot\text{sec}$ ) | % Area | Height ( $\mu\text{V}$ ) | % Height | Integration Type | Points Across Peak | Start Time (min) | End Time (min) |
|---|----------|-----------|---------------------------------------|--------|--------------------------|----------|------------------|--------------------|------------------|----------------|
| 1 | 10.734   | Unknown   | 3538195                               | 49.85  | 207406                   | 49.72    | BB               | 596                | 10.347           | 11.340         |
| 2 | 11.734   | Unknown   | 3559904                               | 50.15  | 209782                   | 50.28    | BB               | 505                | 11.340           | 12.182         |

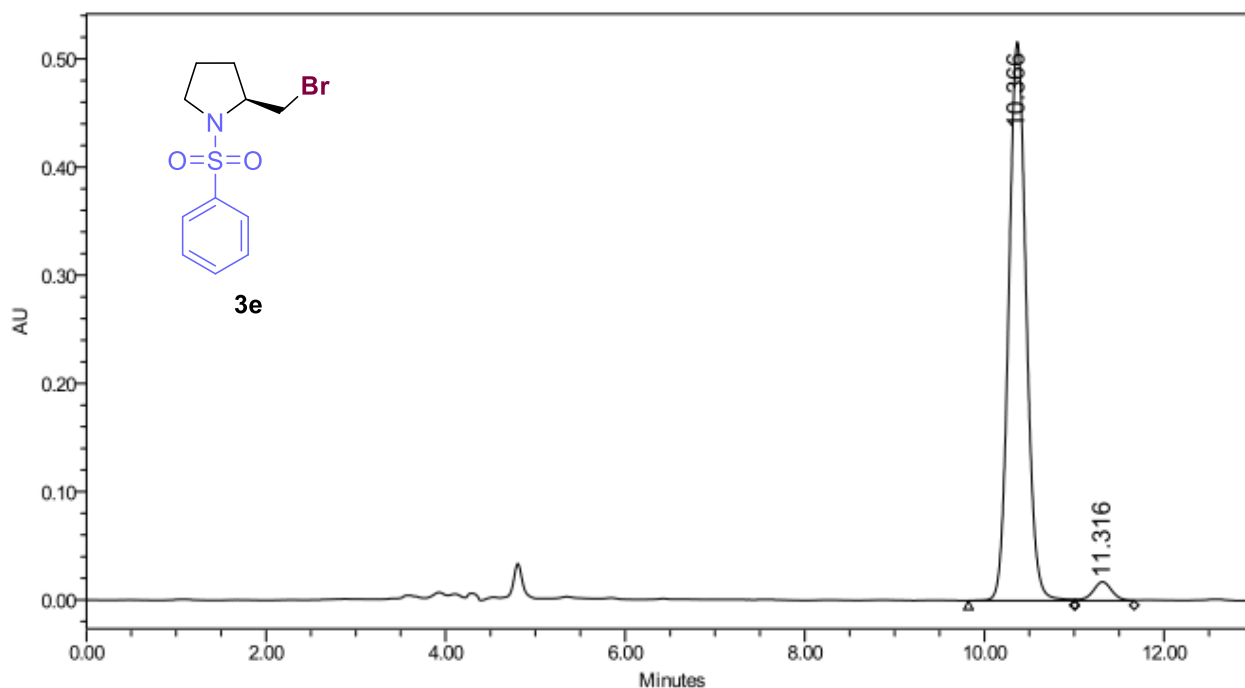

|   | RT (min) | Peak Type | Area ( $\mu\text{V}\cdot\text{sec}$ ) | % Area | Height ( $\mu\text{V}$ ) | % Height | Integration Type | Points Across Peak | Start Time (min) | End Time (min) |
|---|----------|-----------|---------------------------------------|--------|--------------------------|----------|------------------|--------------------|------------------|----------------|
| 1 | 10.366   | Unknown   | 6986778                               | 96.42  | 516596                   | 96.73    | BV               | 710                | 9.822            | 11.005         |
| 2 | 11.316   | Unknown   | 259345                                | 3.58   | 17476                    | 3.27     | VV               | 397                | 11.005           | 11.667         |

7.77  
7.76  
7.52  
7.51  
7.49  
7.45  
7.44  
7.43  
4.24  
4.23  
4.23  
4.21  
3.88  
3.87  
3.86  
3.85  
3.65  
3.63  
3.62  
3.55  
3.54  
3.53  
3.52  
2.30  
2.29  
2.28  
2.27  
2.26  
2.26  
2.25  
2.25  
1.96  
1.94  
1.92  
1.92  
1.90  
1.89  
1.89  
1.88  
1.87  
1.86  
1.82  
1.81  
1.81  
1.80  
1.79  
1.78  
1.76  
1.75  
-0.00

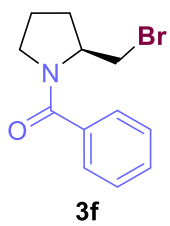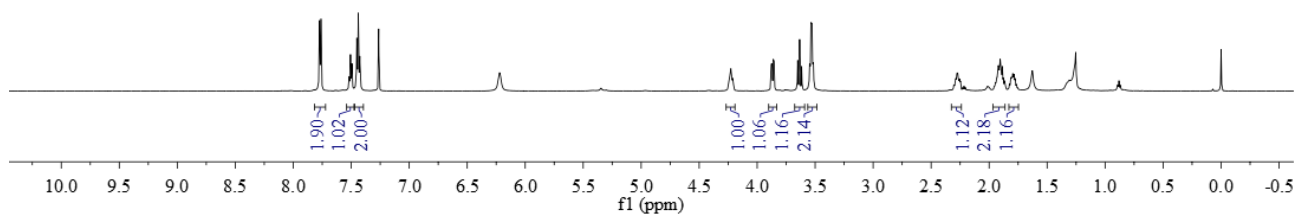

167.73

134.72  
131.56  
128.70  
126.93

77.31  
77.10  
76.89

52.16

39.17  
36.10  
33.51  
27.25

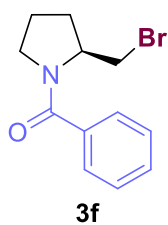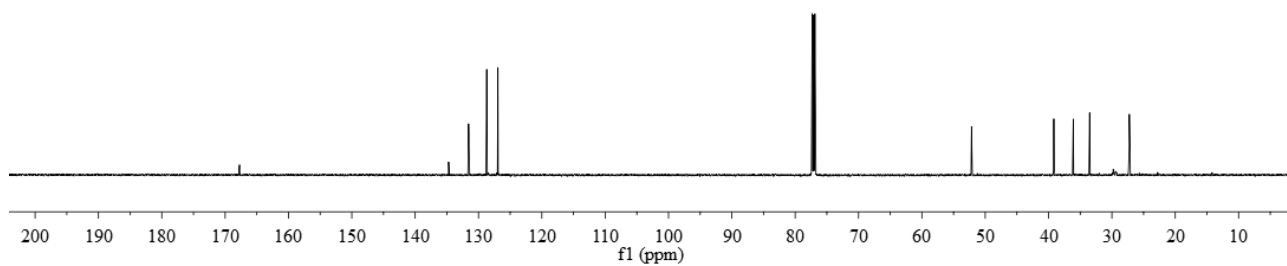

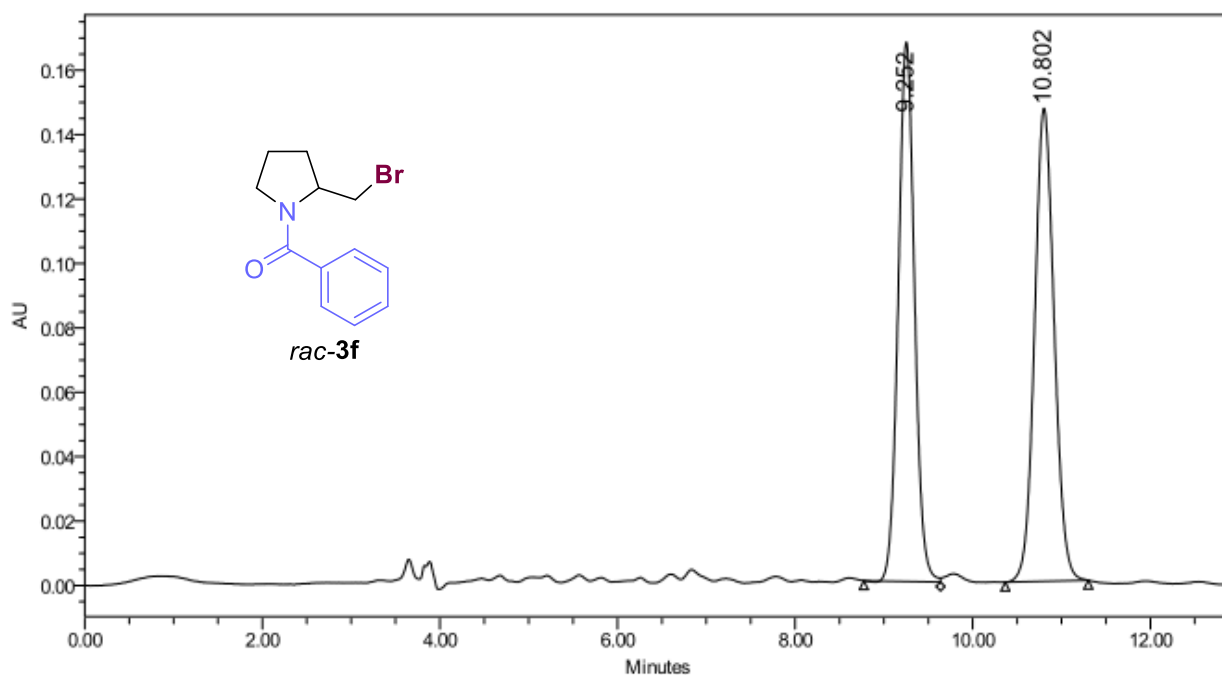

|   | RT (min) | Peak Type | Area ( $\mu\text{V}\cdot\text{sec}$ ) | % Area | Height ( $\mu\text{V}$ ) | % Height | Integration Type | Points Across Peak | Start Time (min) | End Time (min) |
|---|----------|-----------|---------------------------------------|--------|--------------------------|----------|------------------|--------------------|------------------|----------------|
| 1 | 9.252    | Unknown   | 2131632                               | 48.59  | 167428                   | 53.27    | bV               | 518                | 8.773            | 9.637          |
| 2 | 10.802   | Unknown   | 2255527                               | 51.41  | 146863                   | 46.73    | Bb               | 560                | 10.367           | 11.300         |

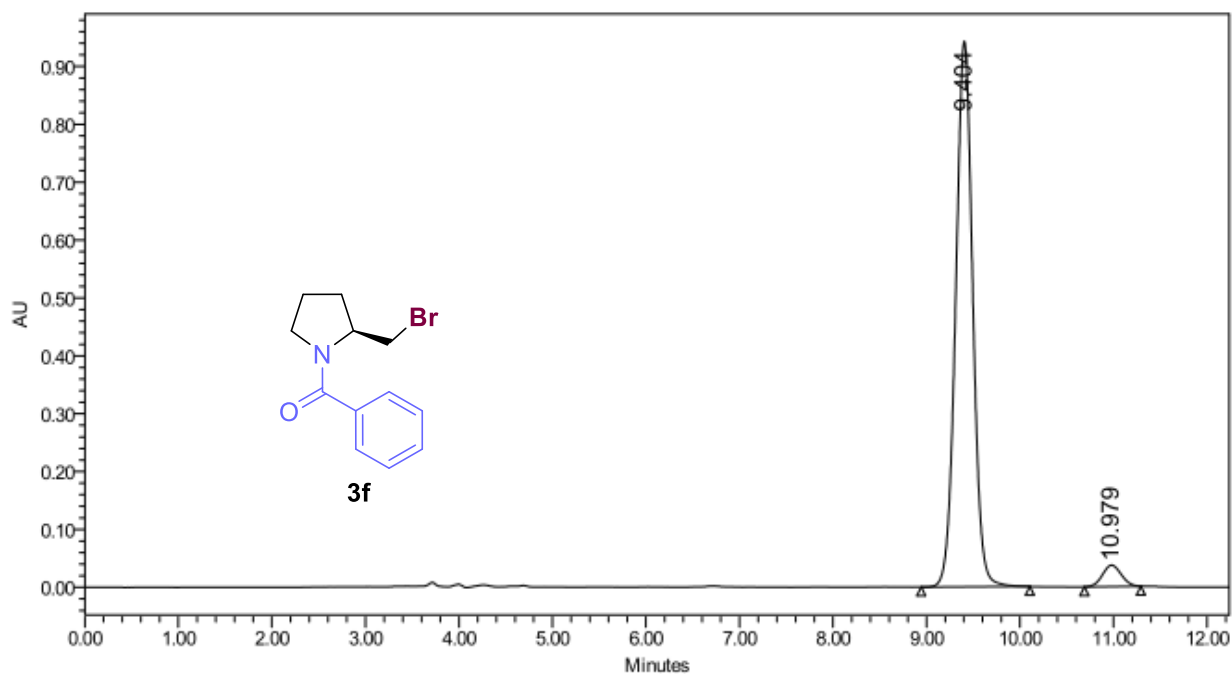

|   | RT (min) | Peak Type | Area ( $\mu\text{V}\cdot\text{sec}$ ) | % Area | Height ( $\mu\text{V}$ ) | % Height | Integration Type | Points Across Peak | Start Time (min) | End Time (min) |
|---|----------|-----------|---------------------------------------|--------|--------------------------|----------|------------------|--------------------|------------------|----------------|
| 1 | 9.404    | Unknown   | 11924274                              | 95.83  | 942576                   | 96.21    | Bb               | 696                | 8.943            | 10.103         |
| 2 | 10.979   | Unknown   | 518473                                | 4.17   | 37086                    | 3.79     | bb               | 363                | 10.687           | 11.292         |

7.66  
7.65  
7.27  
7.26  
4.44  
4.42  
3.90  
3.89  
3.88  
3.40  
3.40  
3.39  
3.23  
3.23  
3.22  
3.22  
2.37  
1.95  
1.94  
1.93  
1.92  
1.76  
1.74  
1.73  
1.69  
1.68  
1.67  
1.57  
1.56  
1.56  
1.55  
1.54  
1.52  
1.50  
1.36  
1.35  
1.34  
1.33  
1.32  
1.31  
1.29  
1.28  
1.27  
1.26  
1.25  
1.24  
0.87  
0.86  
0.85  
0.00

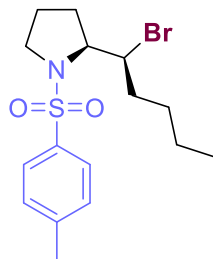

**3g**

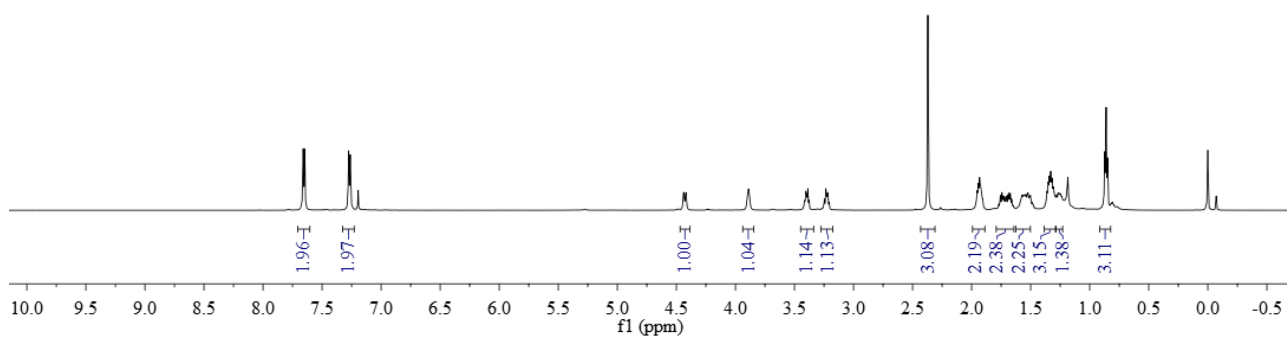

143.83  
134.10  
129.87  
127.71  
77.31  
77.10  
76.89  
64.41  
58.93  
50.99  
31.08  
30.31  
27.72  
24.45  
22.19  
21.58  
14.02

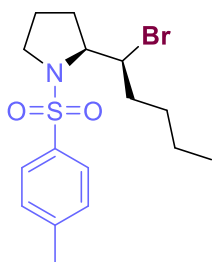

**3g**

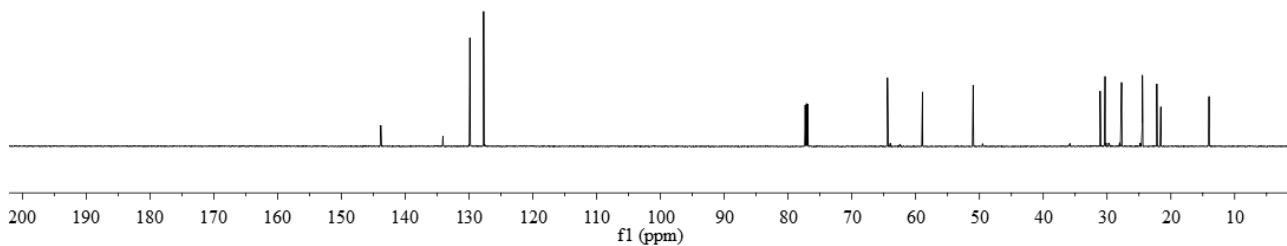

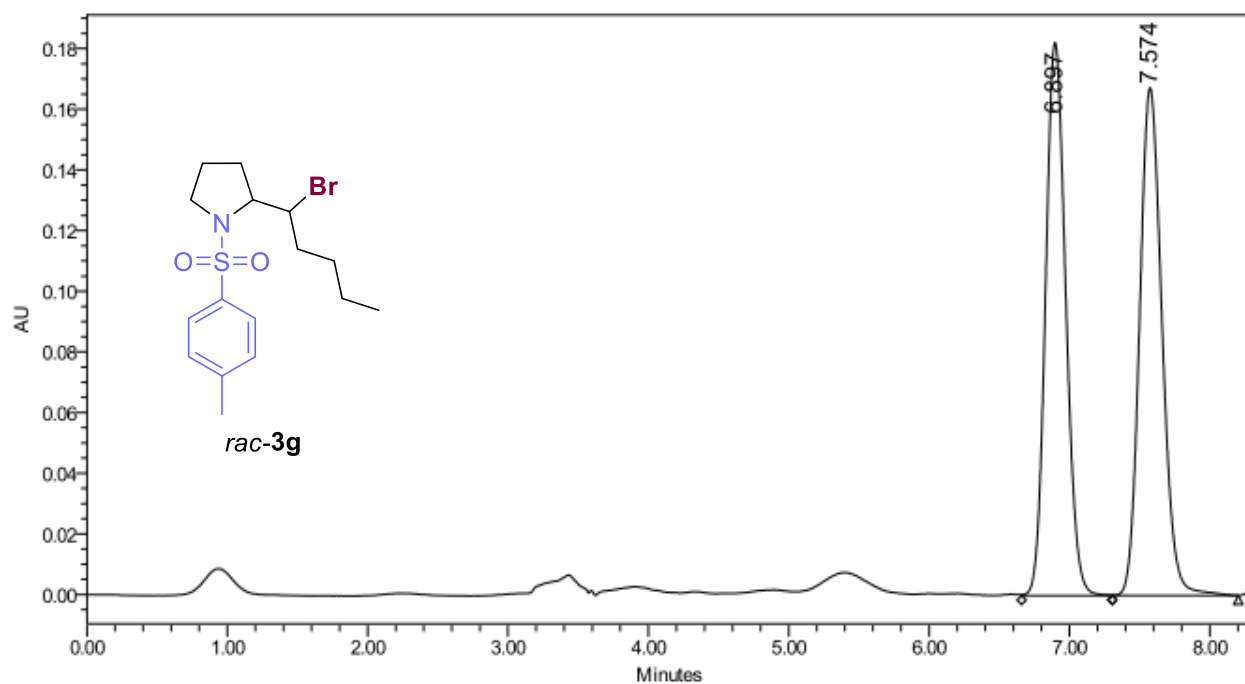

|   | RT (min) | Peak Type | Area ( $\mu\text{V}\cdot\text{sec}$ ) | % Area | Height ( $\mu\text{V}$ ) | % Height | Integration Type | Points Across Peak | Start Time (min) | End Time (min) |
|---|----------|-----------|---------------------------------------|--------|--------------------------|----------|------------------|--------------------|------------------|----------------|
| 1 | 6.897    | Unknown   | 1818293                               | 49.51  | 182331                   | 52.13    | VV               | 388                | 6.658            | 7.305          |
| 2 | 7.574    | Unknown   | 1854482                               | 50.49  | 167404                   | 47.87    | VB               | 538                | 7.305            | 8.202          |

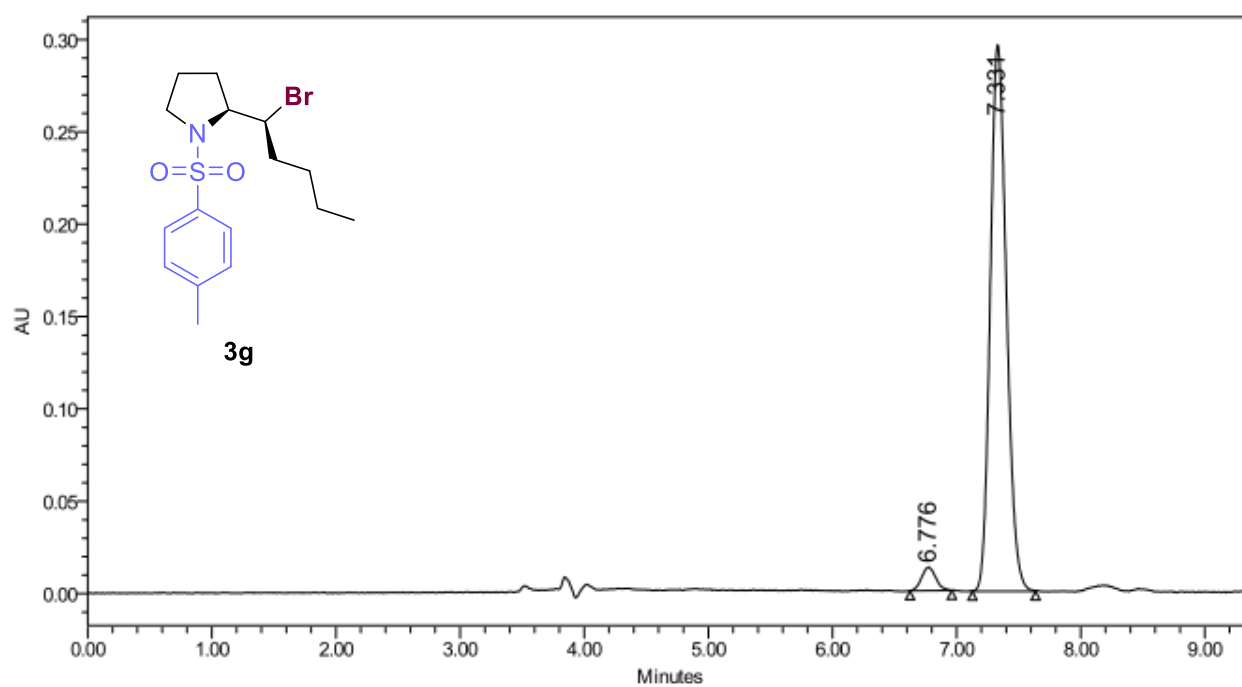

|   | RT (min) | Peak Type | Area ( $\mu\text{V}\cdot\text{sec}$ ) | % Area | Height ( $\mu\text{V}$ ) | % Height | Integration Type | Points Across Peak | Start Time (min) | End Time (min) |
|---|----------|-----------|---------------------------------------|--------|--------------------------|----------|------------------|--------------------|------------------|----------------|
| 1 | 6.776    | Unknown   | 101361                                | 3.65   | 12714                    | 4.12     | BB               | 202                | 6.625            | 6.962          |
| 2 | 7.331    | Unknown   | 2676001                               | 96.35  | 295913                   | 95.88    | BB               | 306                | 7.127            | 7.637          |

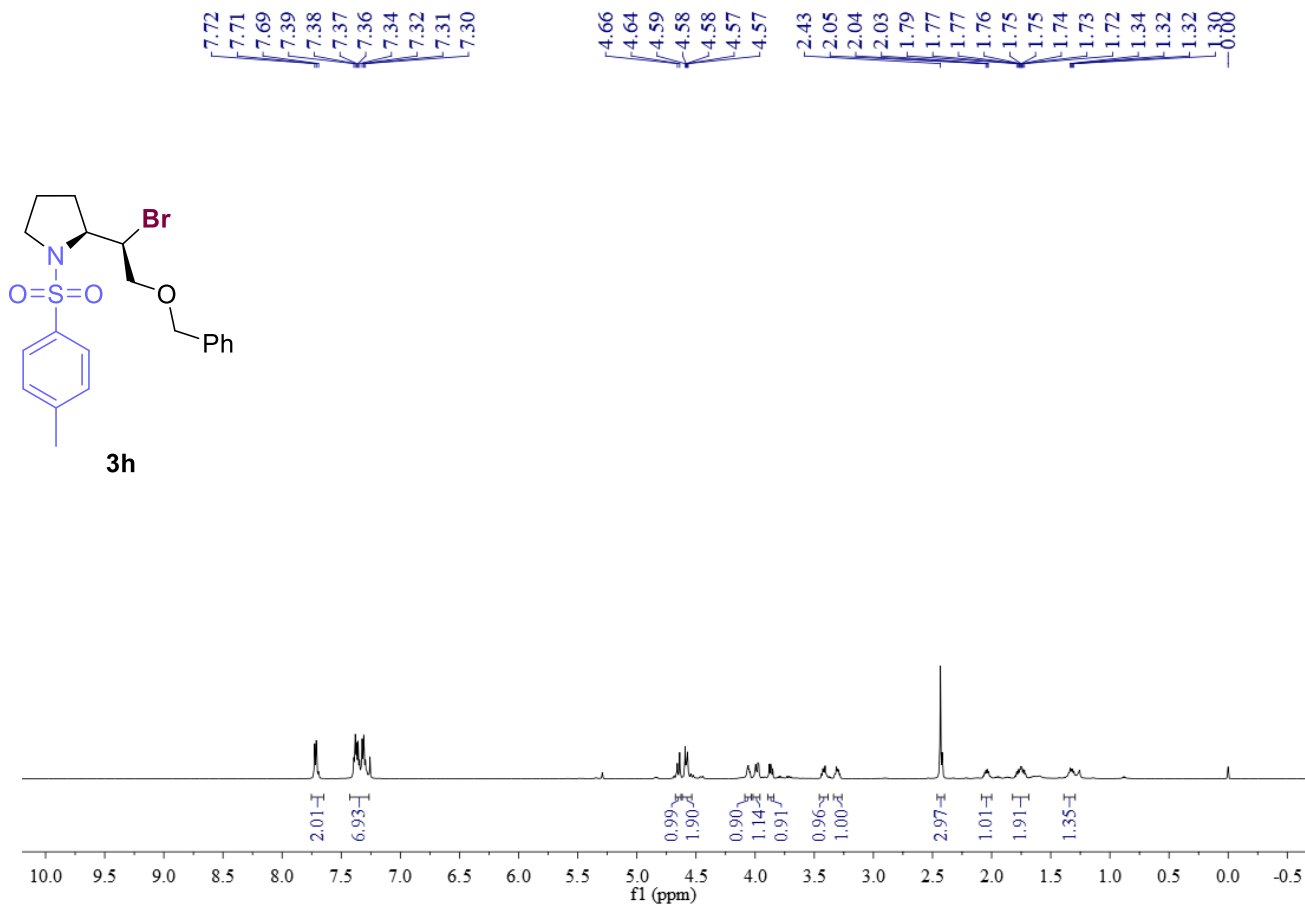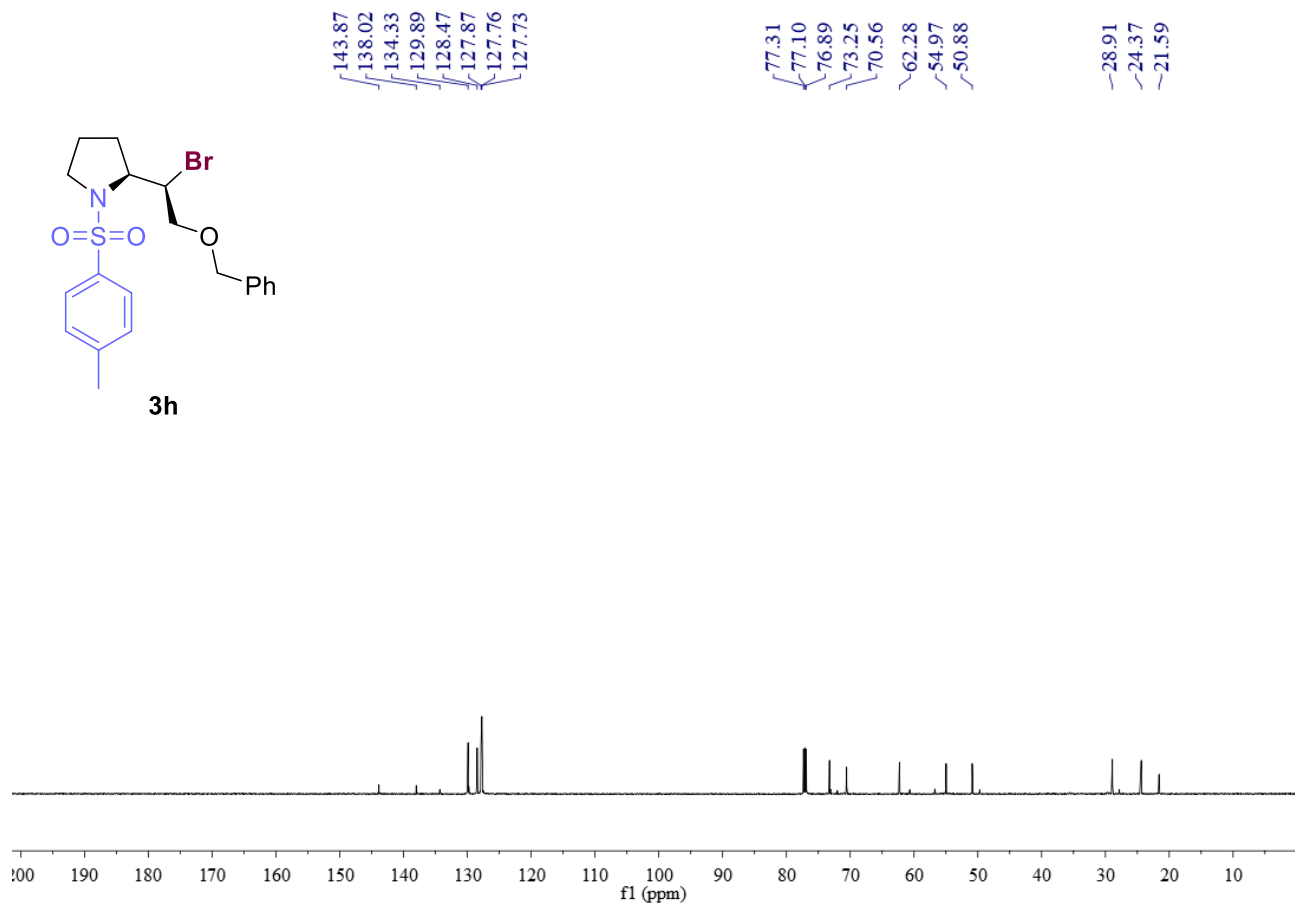

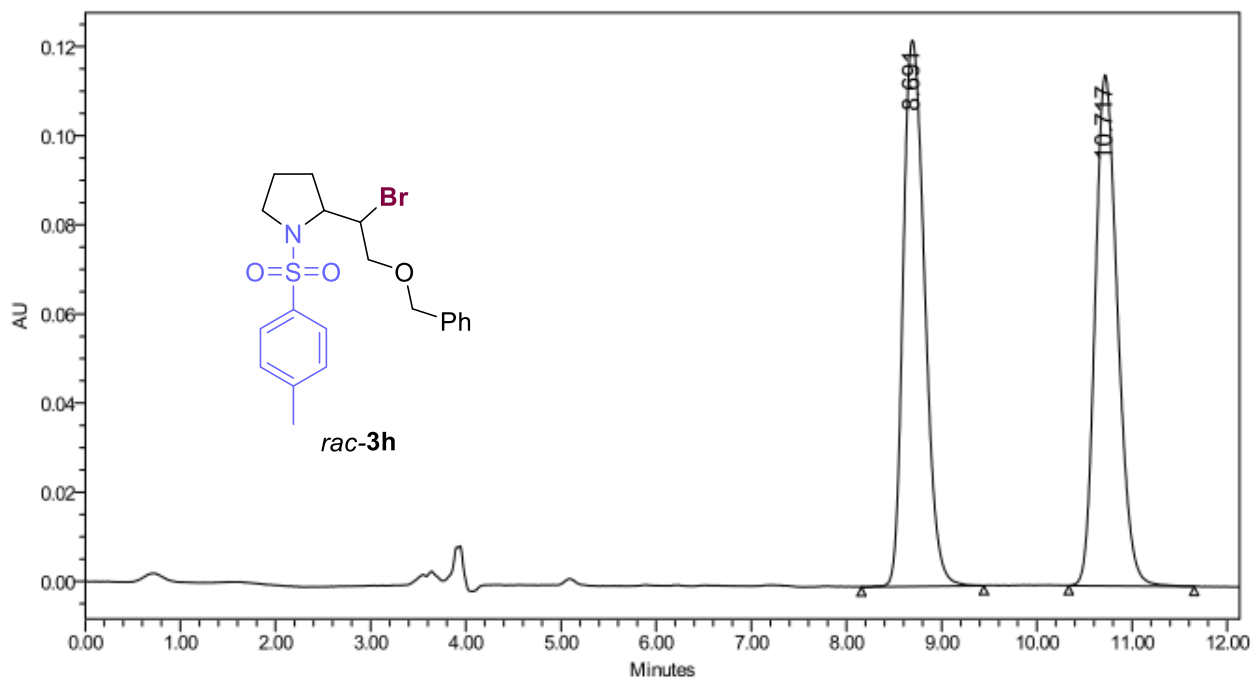

|   | RT (min) | Peak Type | Area ( $\mu\text{V}\cdot\text{sec}$ ) | % Area | Height ( $\mu\text{V}$ ) | % Height | Integration Type | Points Across Peak | Start Time (min) | End Time (min) |
|---|----------|-----------|---------------------------------------|--------|--------------------------|----------|------------------|--------------------|------------------|----------------|
| 1 | 8.691    | Unknown   | 1927469                               | 50.55  | 122577                   | 51.66    | BB               | 772                | 8.157            | 9.443          |
| 2 | 10.717   | Unknown   | 1885257                               | 49.45  | 114688                   | 48.34    | BB               | 791                | 10.335           | 11.653         |

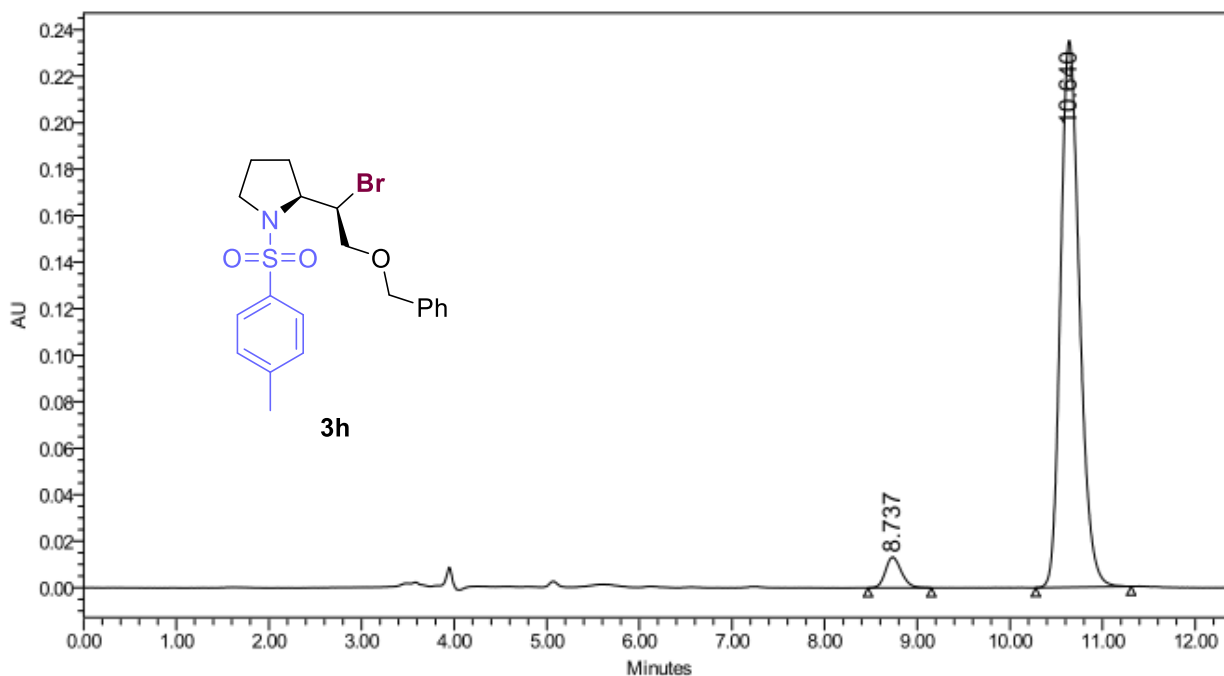

|   | RT (min) | Peak Type | Area ( $\mu\text{V}\cdot\text{sec}$ ) | % Area | Height ( $\mu\text{V}$ ) | % Height | Integration Type | Points Across Peak | Start Time (min) | End Time (min) |
|---|----------|-----------|---------------------------------------|--------|--------------------------|----------|------------------|--------------------|------------------|----------------|
| 1 | 8.737    | Unknown   | 159463                                | 4.55   | 13211                    | 5.32     | BB               | 410                | 8.468            | 9.152          |
| 2 | 10.640   | Unknown   | 3342767                               | 95.45  | 235102                   | 94.68    | BB               | 618                | 10.280           | 11.310         |

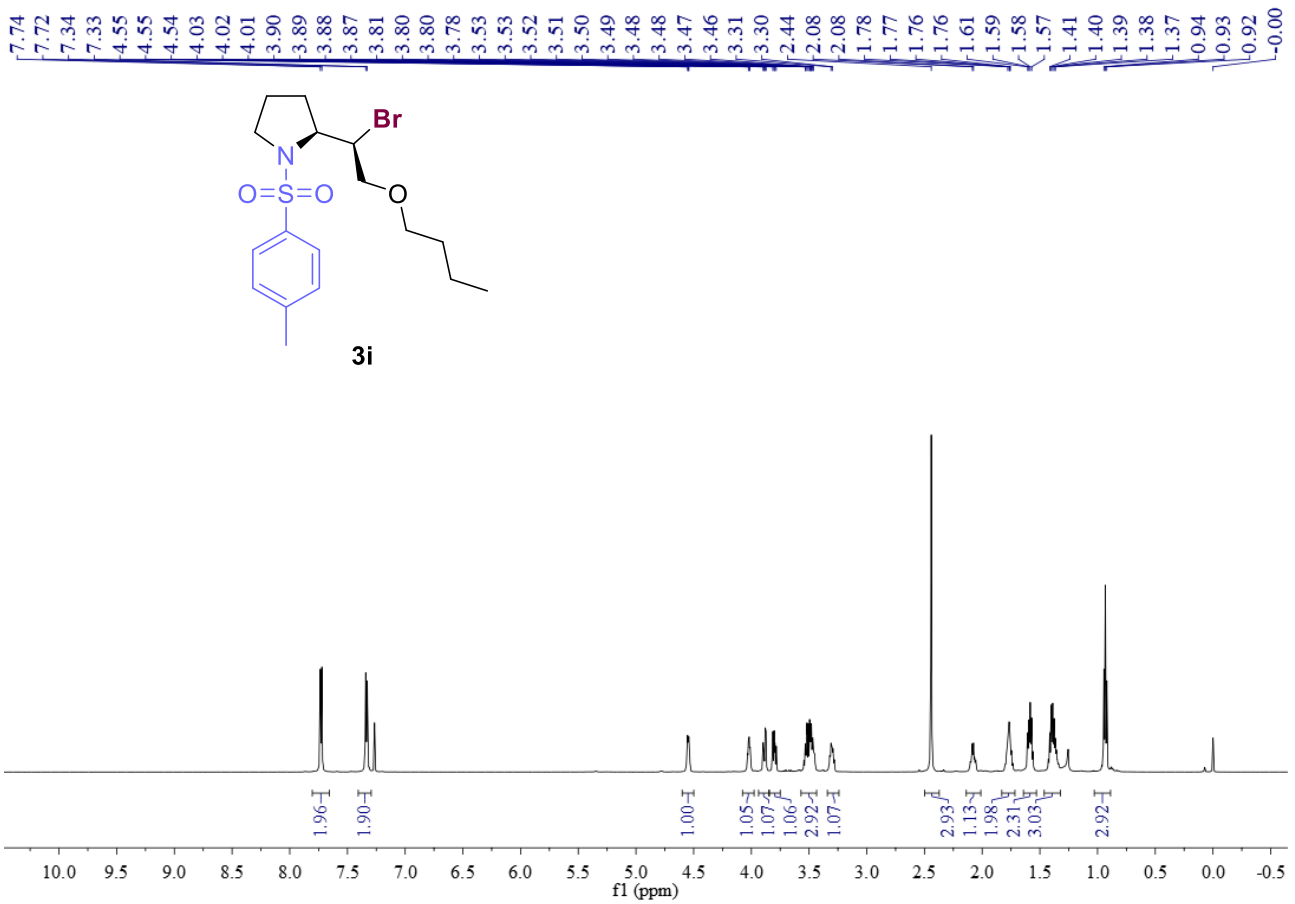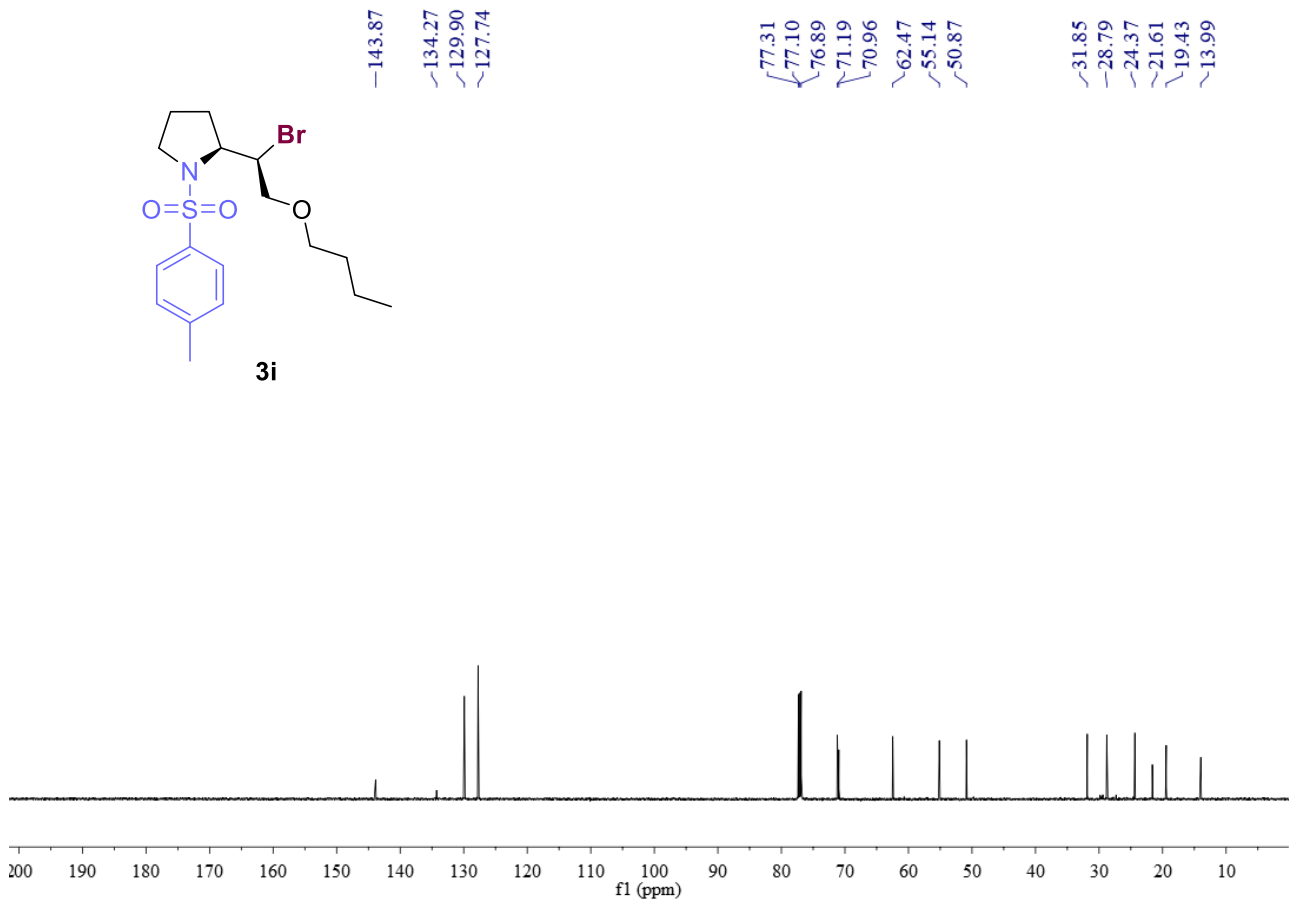



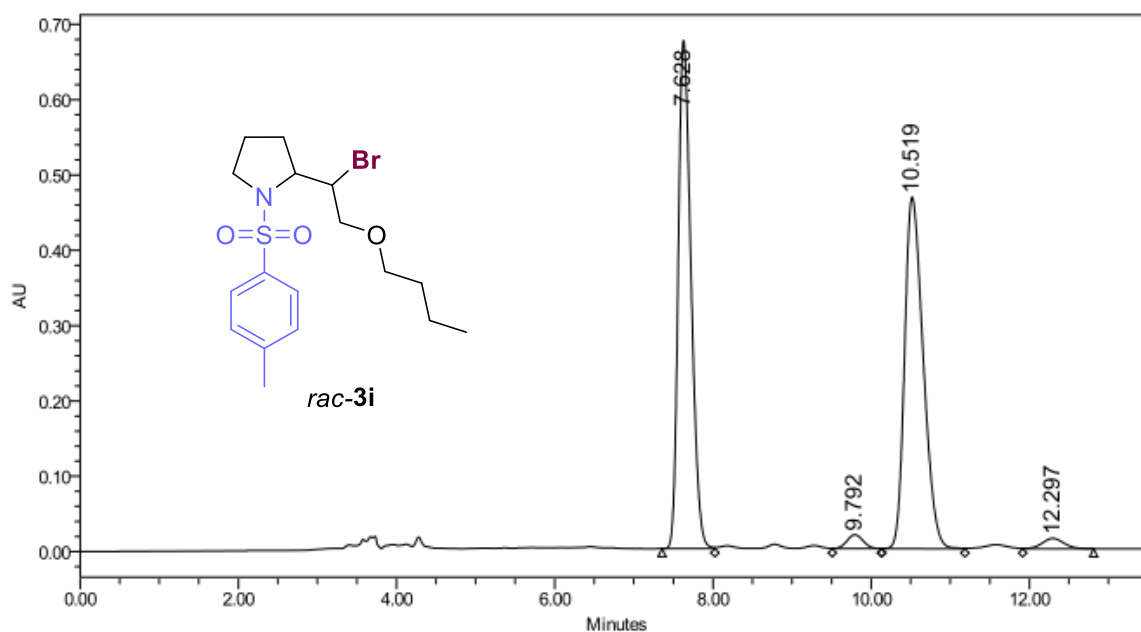

| Peak | RT (min) | Peak Type | Area ( $\mu\text{V}\cdot\text{sec}$ ) | % Area | Height ( $\mu\text{V}$ ) | % Height | Integration Type | Points Across Peak | Start Time (min) | End Time (min) |
|------|----------|-----------|---------------------------------------|--------|--------------------------|----------|------------------|--------------------|------------------|----------------|
| 1    | 7.628    | Unknown   | 7577702                               | 48.12  | 674812                   | 57.48    | BV               | 402                | 7.355            | 8.025          |
| 2    | 9.792    | Unknown   | 268121                                | 1.70   | 18598                    | 1.58     | VV               | 374                | 9.510            | 10.133         |
| 3    | 10.519   | Unknown   | 7637927                               | 48.50  | 466861                   | 39.77    | VV               | 632                | 10.133           | 11.187         |
| 4    | 12.297   | Unknown   | 264972                                | 1.68   | 13759                    | 1.17     | VB               | 538                | 11.915           | 12.812         |

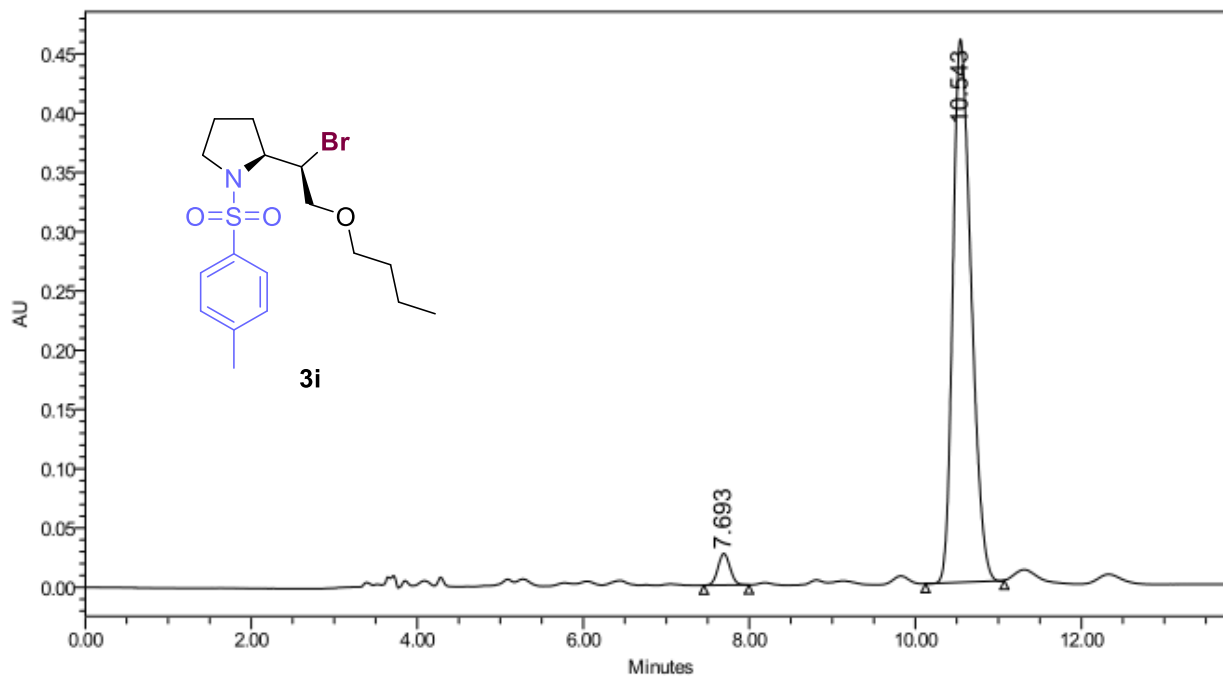

| Peak | RT (min) | Peak Type | Area ( $\mu\text{V}\cdot\text{sec}$ ) | % Area | Height ( $\mu\text{V}$ ) | % Height | Integration Type | Points Across Peak | Start Time (min) | End Time (min) |
|------|----------|-----------|---------------------------------------|--------|--------------------------|----------|------------------|--------------------|------------------|----------------|
| 1    | 7.693    | Unknown   | 271973                                | 3.73   | 26664                    | 5.50     | bb               | 325                | 7.453            | 7.995          |
| 2    | 10.543   | Unknown   | 7019269                               | 96.27  | 458256                   | 94.50    | bb               | 570                | 10.122           | 11.072         |

7.73  
7.71  
7.33  
7.32  
5.93  
5.92  
5.33  
5.33  
5.30  
5.30  
5.21  
5.19  
4.55  
4.54  
4.54  
4.54  
4.53  
4.08  
4.07  
4.06  
4.05  
4.03  
4.03  
4.02  
4.01  
3.93  
3.92  
3.91  
3.90  
3.83  
3.82  
3.81  
3.80  
3.47  
3.46  
3.45  
3.31  
3.30  
3.29  
2.43  
2.06  
2.05  
1.79  
1.78  
1.76  
1.76  
1.75  
1.36  
1.35  
-0.01

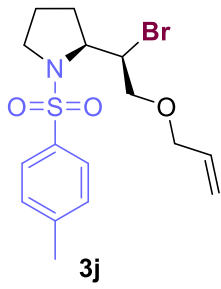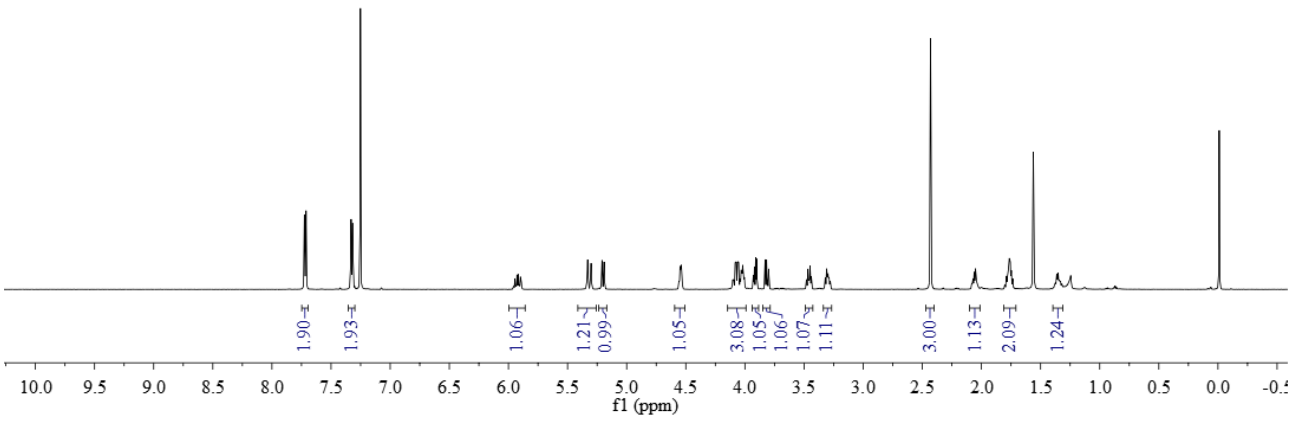

143.90  
134.49  
134.28  
129.92  
127.77  
117.39  
77.31  
77.10  
76.89  
72.15  
70.40  
62.39  
54.95  
50.91  
28.88  
24.38  
21.62

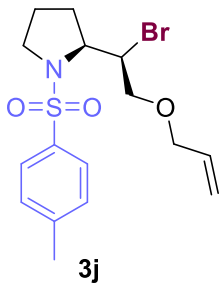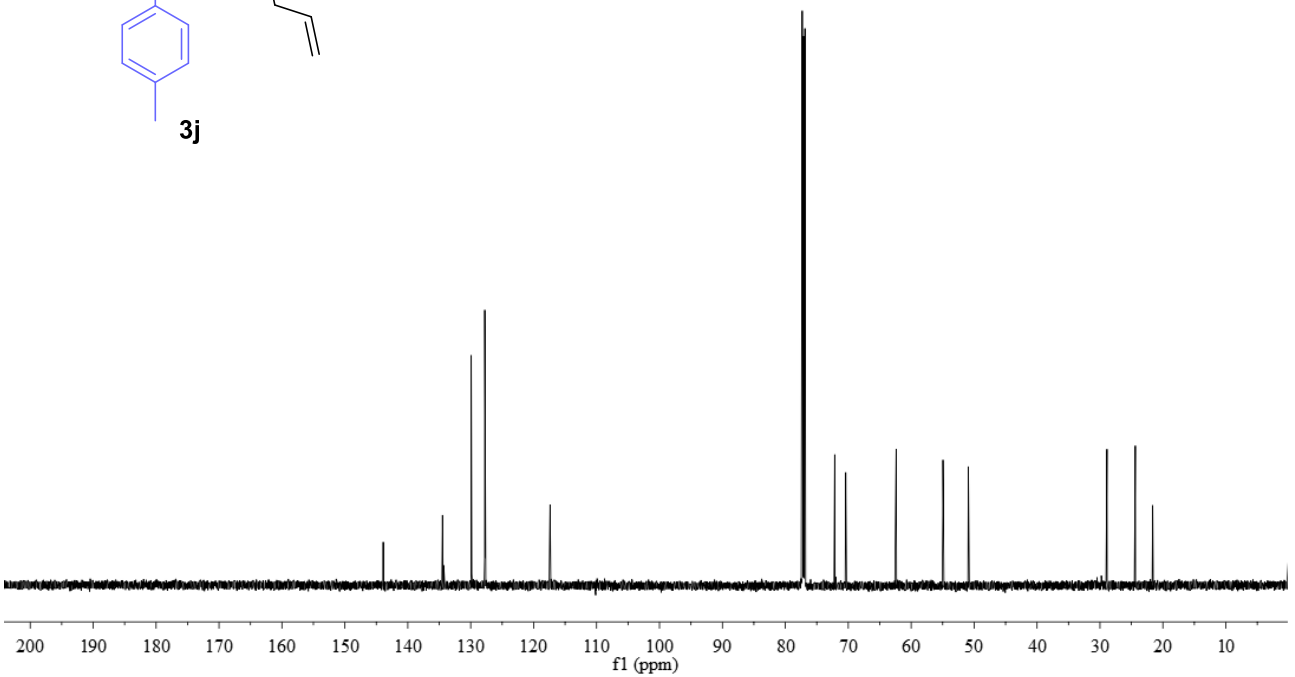

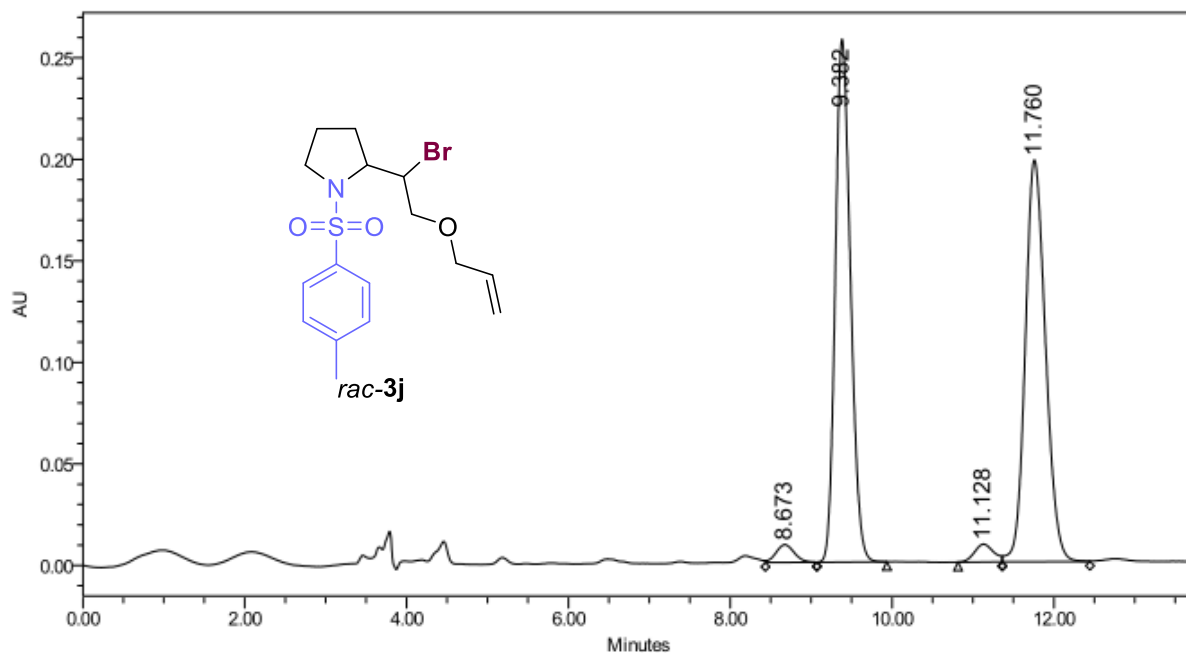

| RT (min) | Peak Type | Area ( $\mu\text{V}\cdot\text{sec}$ ) | % Area  | Height ( $\mu\text{V}$ ) | % Height | Integration Type | Points Across Peak | Start Time (min) | End Time (min) |        |
|----------|-----------|---------------------------------------|---------|--------------------------|----------|------------------|--------------------|------------------|----------------|--------|
| 1        | 8.673     | Unknown                               | 135911  | 1.92                     | 8715     | 1.84             | VV                 | 382              | 8.435          | 9.072  |
| 2        | 9.382     | Unknown                               | 3358354 | 47.43                    | 257478   | 54.46            | VB                 | 519              | 9.072          | 9.937  |
| 3        | 11.128    | Unknown                               | 143962  | 2.03                     | 8786     | 1.86             | BV                 | 329              | 10.815         | 11.363 |
| 4        | 11.760    | Unknown                               | 3442517 | 48.62                    | 197783   | 41.84            | VV                 | 650              | 11.363         | 12.447 |

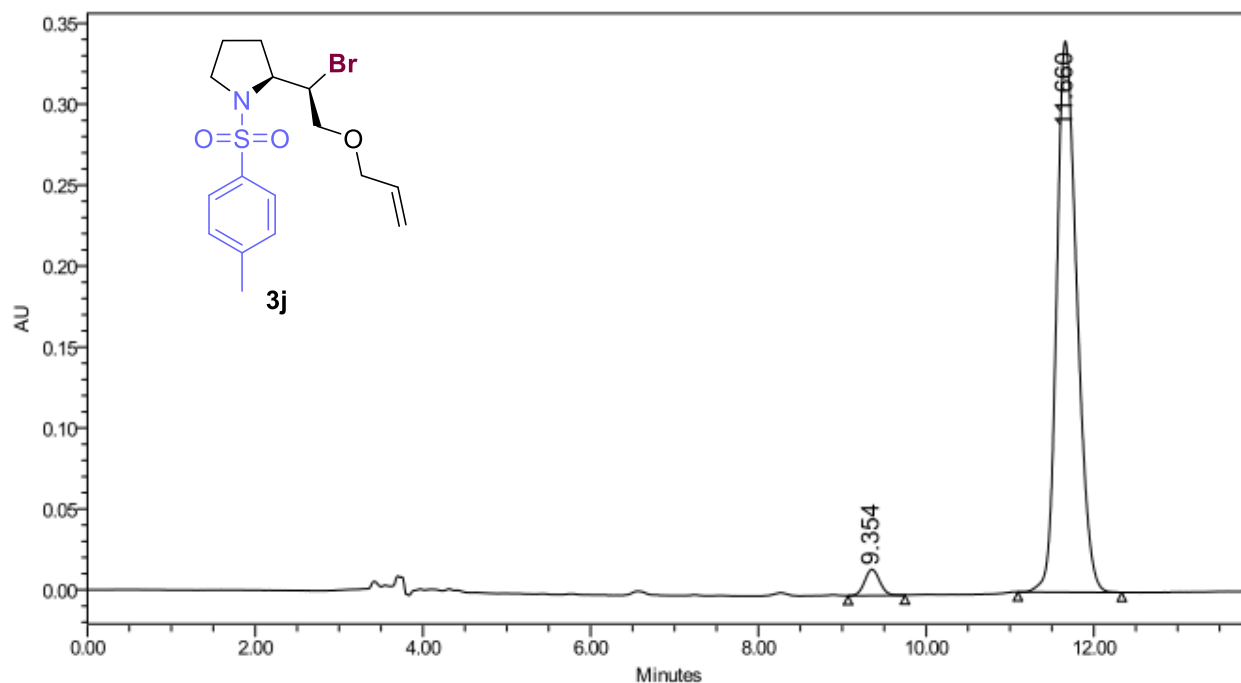

| RT (min) | Peak Type | Area ( $\mu\text{V}\cdot\text{sec}$ ) | % Area  | Height ( $\mu\text{V}$ ) | % Height | Integration Type | Points Across Peak | Start Time (min) | End Time (min) |        |
|----------|-----------|---------------------------------------|---------|--------------------------|----------|------------------|--------------------|------------------|----------------|--------|
| 1        | 9.354     | Unknown                               | 200196  | 3.38                     | 16077    | 4.51             | BB                 | 407              | 9.070          | 9.748  |
| 2        | 11.660    | Unknown                               | 5718735 | 96.62                    | 340391   | 95.49            | bB                 | 744              | 11.093         | 12.333 |

8.41  
8.40  
8.05  
8.04  
4.40  
4.38  
4.01  
4.01  
4.00  
3.56  
3.55  
3.54  
3.53  
3.52  
3.34  
3.33  
3.32  
3.31  
3.30  
2.10  
2.09  
2.08  
2.07  
2.06  
2.05  
2.04  
2.03  
1.88  
1.87  
1.86  
1.85  
1.85  
1.84  
1.83  
1.82  
1.64  
1.63  
1.62  
1.61  
1.61  
1.59  
1.58  
1.50  
1.49  
1.49  
1.47  
1.13  
1.12  
1.11  
-0.00

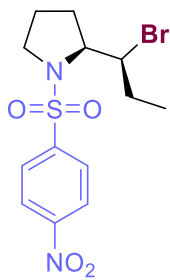

3k

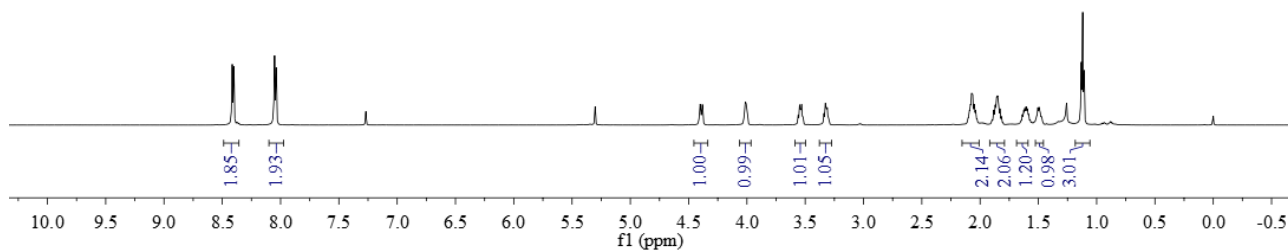

150.44  
142.87  
128.84  
124.54  
77.31  
77.10  
76.89  
64.75  
60.36  
51.05  
27.91  
24.97  
24.49  
12.96

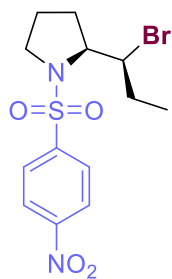

3k

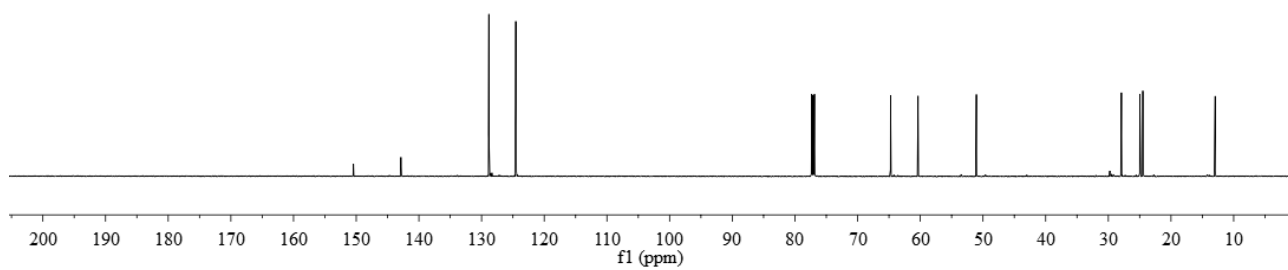

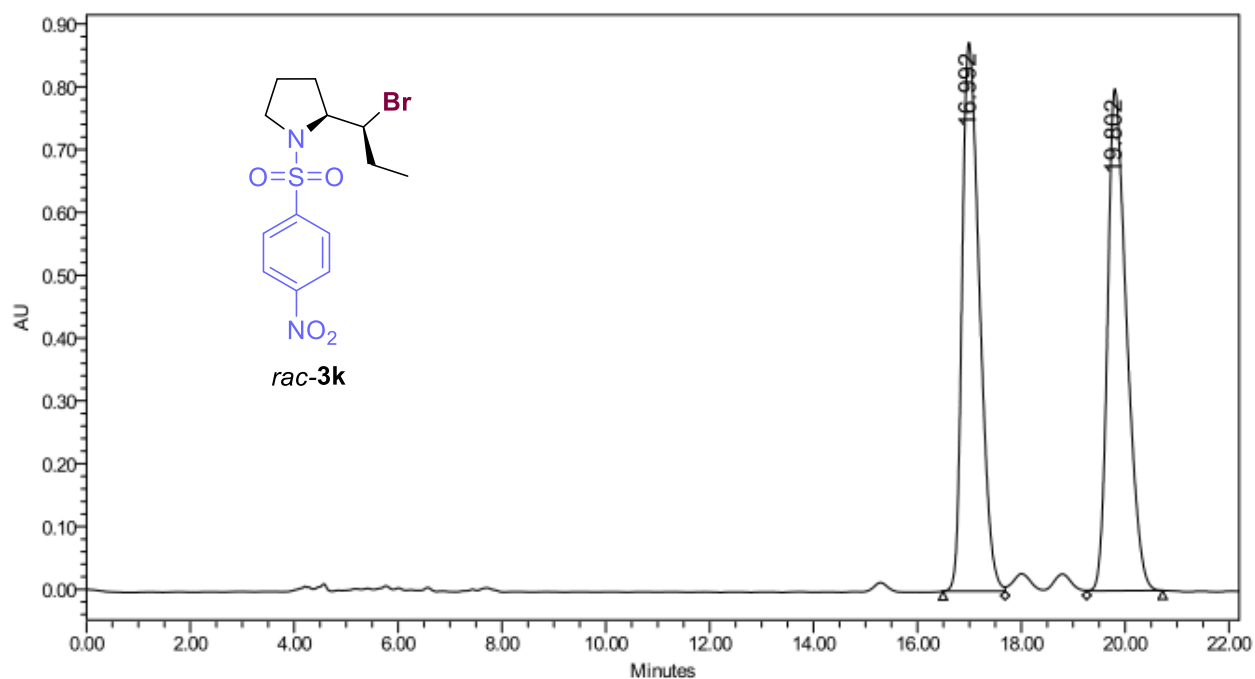

|   | RT (min) | Peak Type | Area ( $\mu\text{V}\cdot\text{sec}$ ) | % Area | Height ( $\mu\text{V}$ ) | % Height | Integration Type | Points Across Peak | Start Time (min) | End Time (min) |
|---|----------|-----------|---------------------------------------|--------|--------------------------|----------|------------------|--------------------|------------------|----------------|
| 1 | 16.992   | Unknown   | 20299309                              | 49.92  | 873636                   | 52.23    | BV               | 717                | 16.493           | 17.688         |
| 2 | 19.802   | Unknown   | 20361278                              | 50.08  | 799067                   | 47.77    | VB               | 877                | 19.260           | 20.722         |

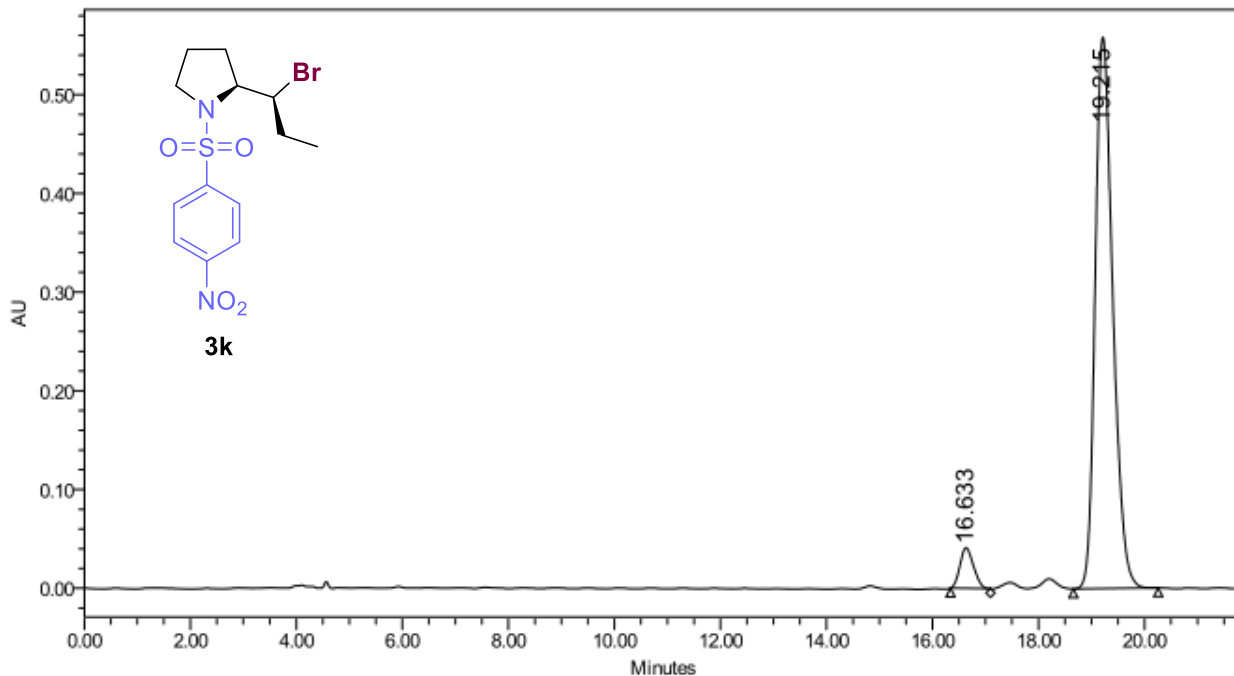

|   | RT (min) | Peak Type | Area ( $\mu\text{V}\cdot\text{sec}$ ) | % Area | Height ( $\mu\text{V}$ ) | % Height | Integration Type | Points Across Peak | Start Time (min) | End Time (min) |
|---|----------|-----------|---------------------------------------|--------|--------------------------|----------|------------------|--------------------|------------------|----------------|
| 1 | 16.633   | Unknown   | 725248                                | 5.34   | 41090                    | 6.85     | bV               | 453                | 16.340           | 17.095         |
| 2 | 19.215   | Unknown   | 12851672                              | 94.66  | 558378                   | 93.15    | Bb               | 960                | 18.657           | 20.257         |

7.74  
7.73  
7.33  
7.32  
4.58  
4.57  
4.57  
4.56  
3.76  
3.76  
3.75  
3.75  
3.74  
3.38  
3.38  
3.37  
3.36  
3.36  
3.35  
3.34  
3.33  
2.44  
2.00  
1.99  
1.98  
1.89  
1.88  
1.87  
1.79  
1.78  
1.78  
1.77  
1.76  
1.76  
1.75  
1.74  
1.74  
1.73  
1.72  
1.71  
1.45  
1.40  
1.38  
1.38  
1.37  
1.36  
0.97  
0.96  
0.95  
0.00

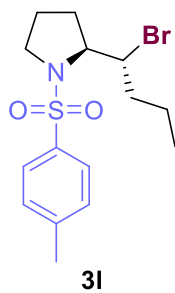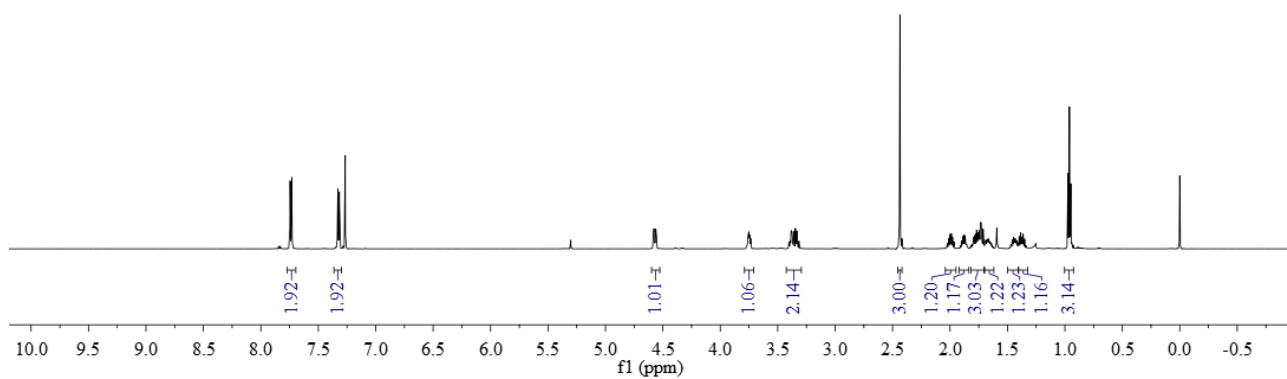

143.65  
135.75  
129.82  
127.63  
77.31  
77.10  
76.89  
64.01  
62.17  
49.53  
38.14  
28.10  
24.85  
21.61  
21.28  
13.54

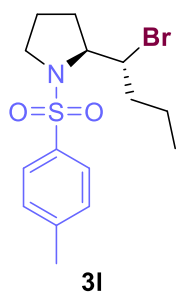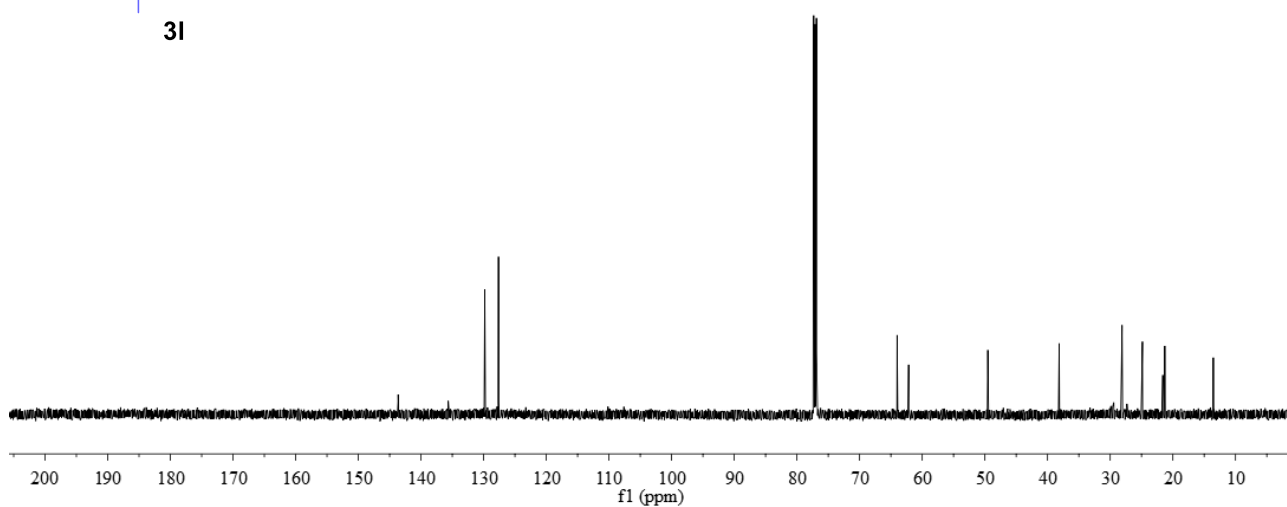

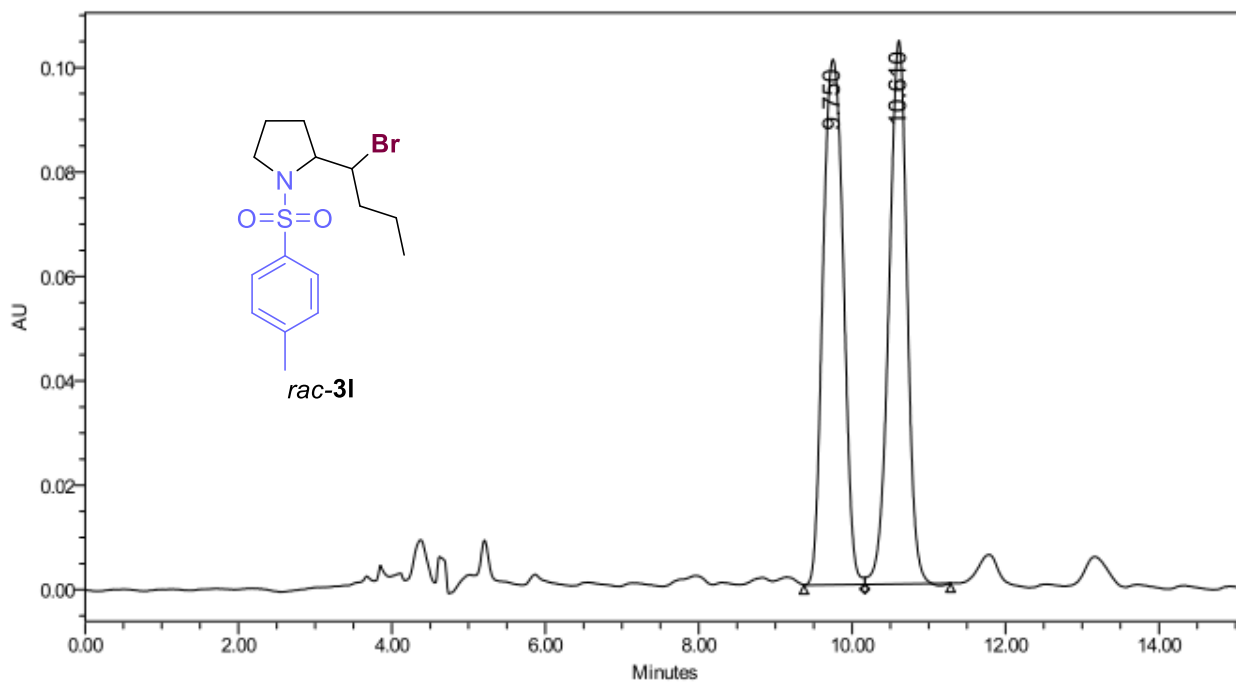

|   | RT (min) | Peak Type | Area ( $\mu\text{V}\cdot\text{sec}$ ) | % Area | Height ( $\mu\text{V}$ ) | % Height | Integration Type | Points Across Peak | Start Time (min) | End Time (min) |
|---|----------|-----------|---------------------------------------|--------|--------------------------|----------|------------------|--------------------|------------------|----------------|
| 1 | 9.750    | Unknown   | 1862878                               | 52.15  | 100622                   | 49.15    | BV               | 477                | 9.372            | 10.167         |
| 2 | 10.610   | Unknown   | 1709492                               | 47.85  | 104092                   | 50.85    | Vb               | 670                | 10.167           | 11.283         |

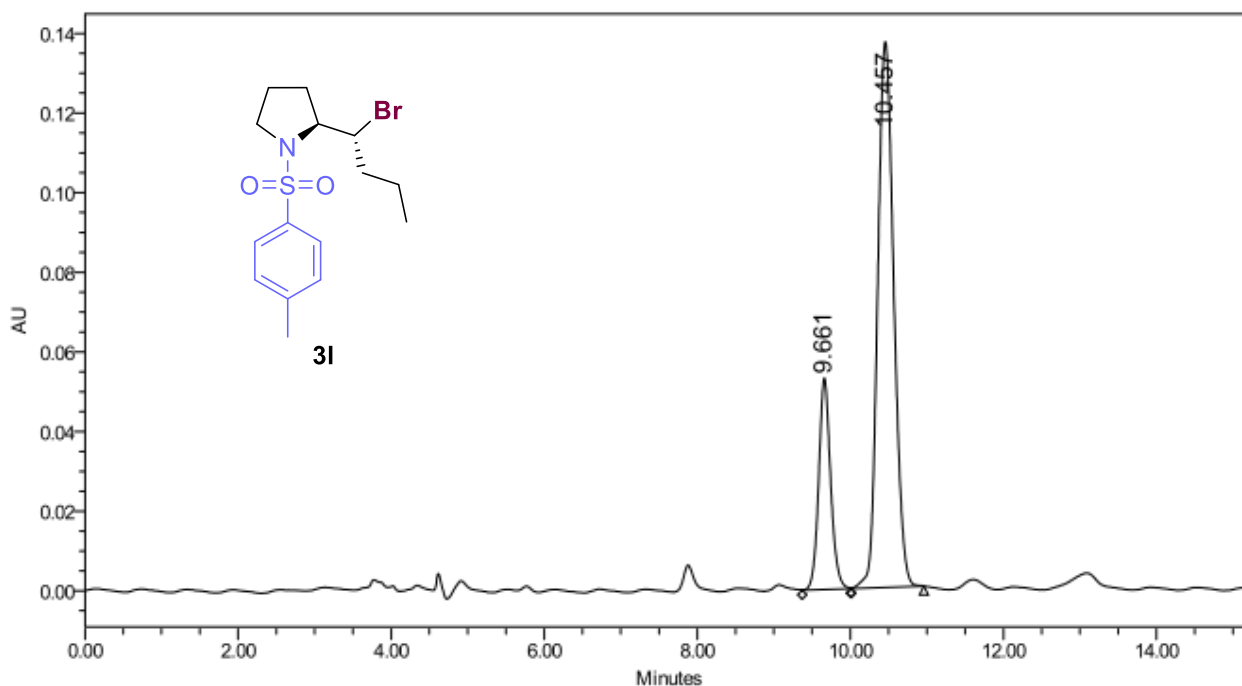

|   | RT (min) | Peak Type | Area ( $\mu\text{V}\cdot\text{sec}$ ) | % Area | Height ( $\mu\text{V}$ ) | % Height | Integration Type | Points Across Peak | Start Time (min) | End Time (min) |
|---|----------|-----------|---------------------------------------|--------|--------------------------|----------|------------------|--------------------|------------------|----------------|
| 1 | 9.661    | Unknown   | 570579                                | 22.15  | 53030                    | 27.90    | VV               | 384                | 9.370            | 10.010         |
| 2 | 10.457   | Unknown   | 2005120                               | 77.85  | 137046                   | 72.10    | VB               | 571                | 10.010           | 10.962         |

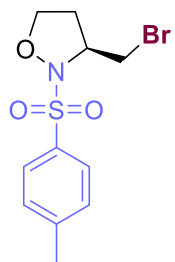

3m

7.87  
7.85  
7.37  
7.36

4.52  
4.50  
4.49  
4.49  
4.47  
4.02  
4.02  
4.00  
3.99  
3.65  
3.35  
2.52  
2.50  
2.50  
2.49  
2.48  
2.48  
2.47  
2.45  
2.25  
2.24  
2.23  
2.23  
0.00

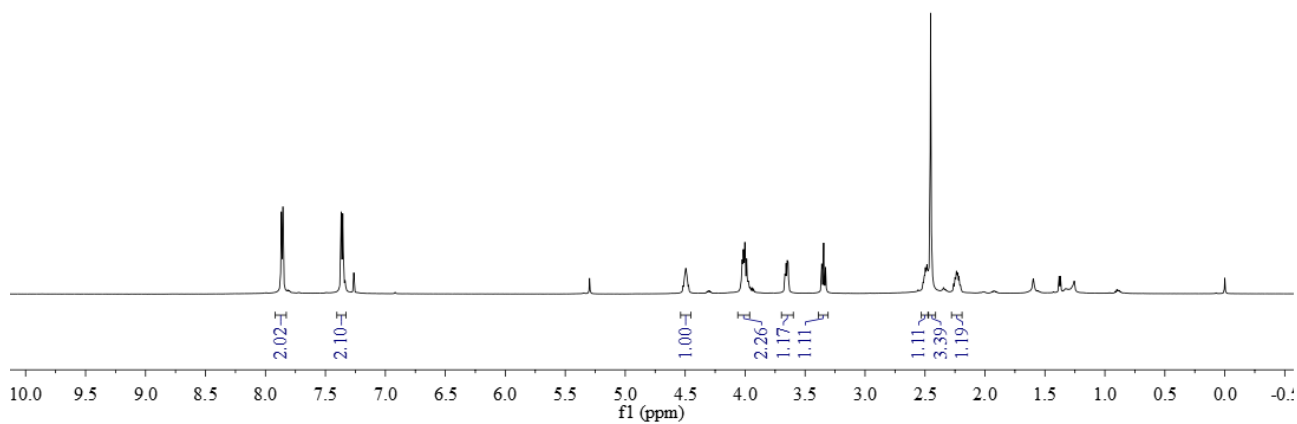

145.37  
132.77  
129.87  
129.30  
77.31  
77.10  
76.89  
70.28  
60.01  
34.35  
34.33  
21.77

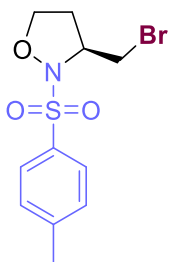

3m

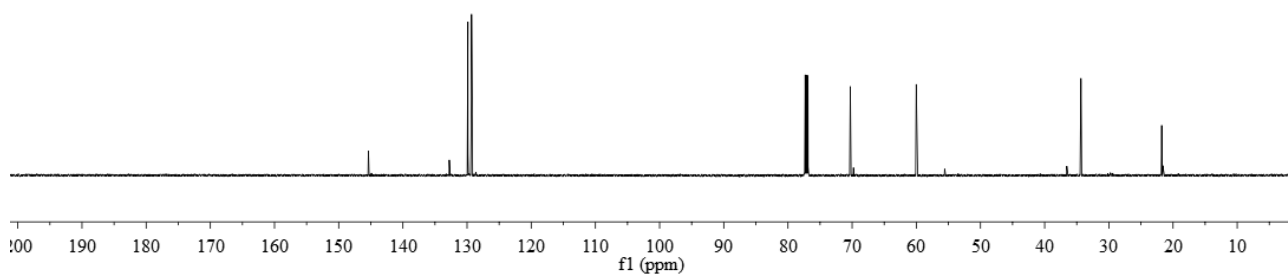



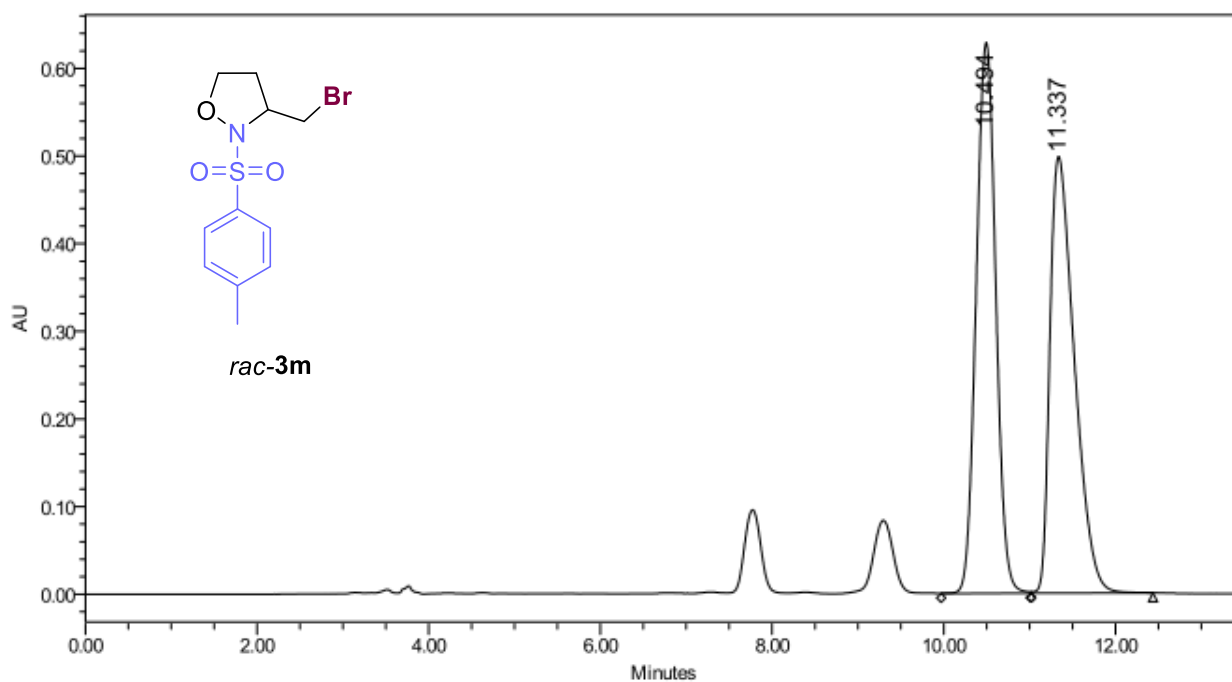

|   | RT (min) | Peak Type | Area ( $\mu\text{V}\cdot\text{sec}$ ) | % Area | Height ( $\mu\text{V}$ ) | % Height | Integration Type | Points Across Peak | Start Time (min) | End Time (min) |
|---|----------|-----------|---------------------------------------|--------|--------------------------|----------|------------------|--------------------|------------------|----------------|
| 1 | 10.494   | Unknown   | 9943508                               | 50.22  | 628475                   | 55.79    | VV               | 629                | 9.968            | 11.017         |
| 2 | 11.337   | Unknown   | 9856768                               | 49.78  | 498067                   | 44.21    | Vb               | 852                | 11.017           | 12.437         |

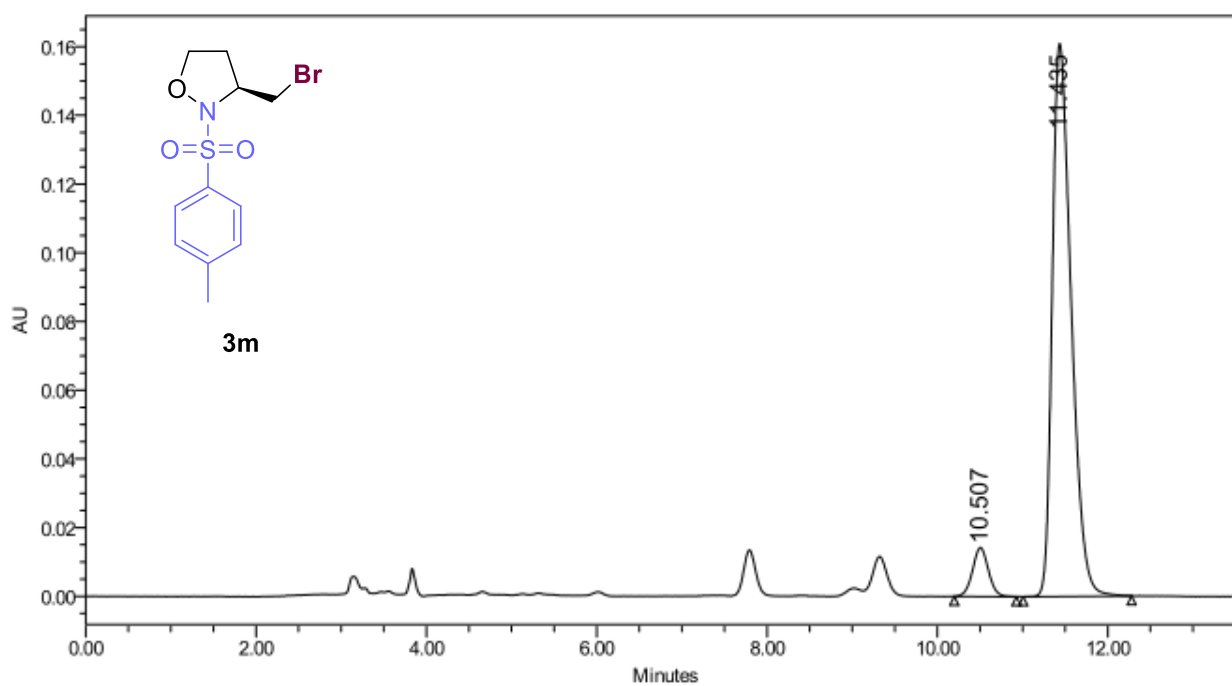

|   | RT (min) | Peak Type | Area ( $\mu\text{V}\cdot\text{sec}$ ) | % Area | Height ( $\mu\text{V}$ ) | % Height | Integration Type | Points Across Peak | Start Time (min) | End Time (min) |
|---|----------|-----------|---------------------------------------|--------|--------------------------|----------|------------------|--------------------|------------------|----------------|
| 1 | 10.507   | Unknown   | 184986                                | 6.95   | 14247                    | 8.13     | BB               | 438                | 10.198           | 10.928         |
| 2 | 11.435   | Unknown   | 2478292                               | 93.05  | 160948                   | 91.87    | BB               | 764                | 11.007           | 12.280         |

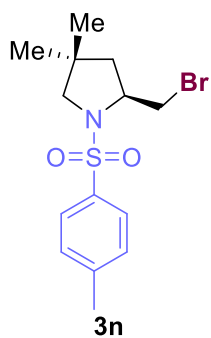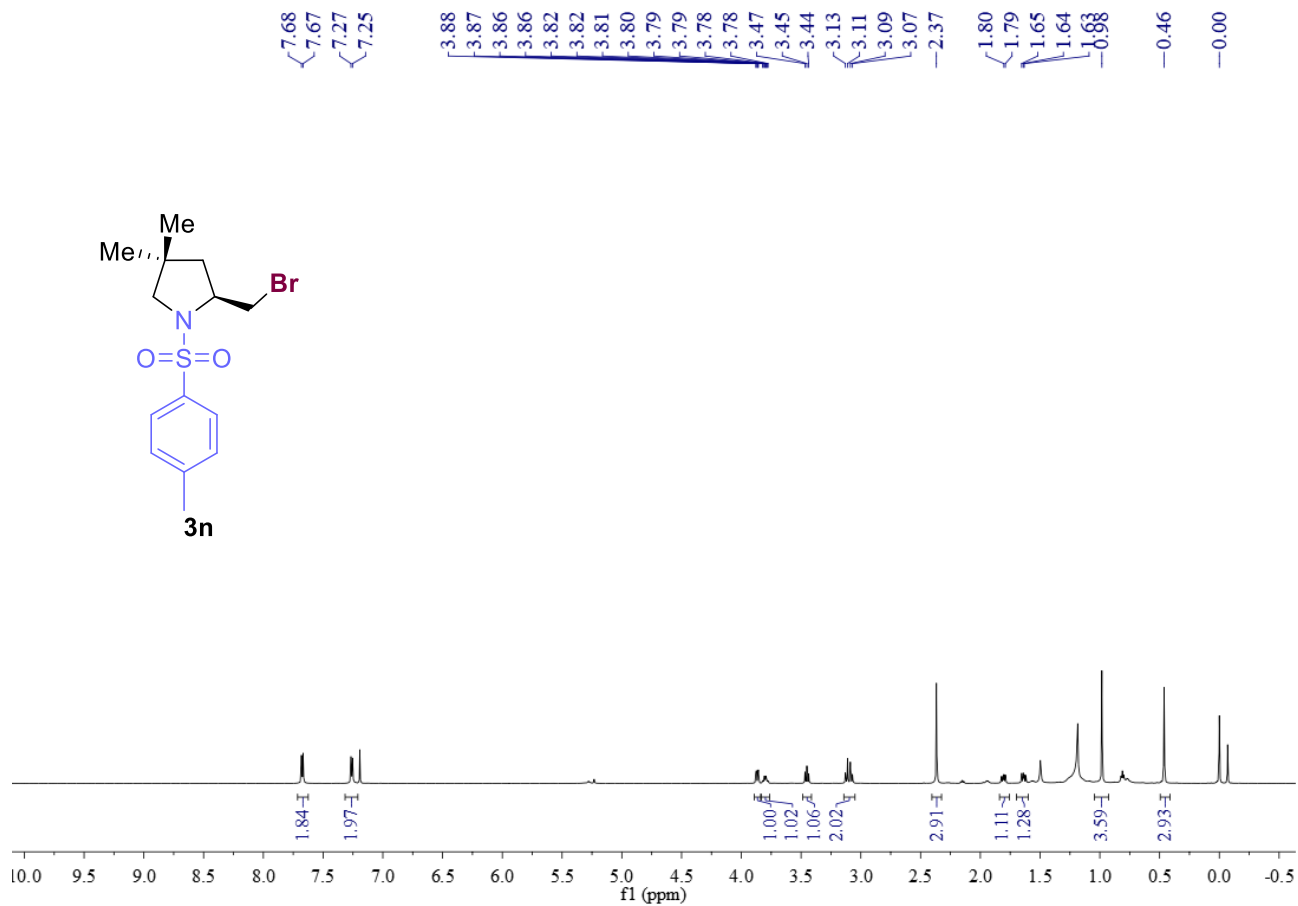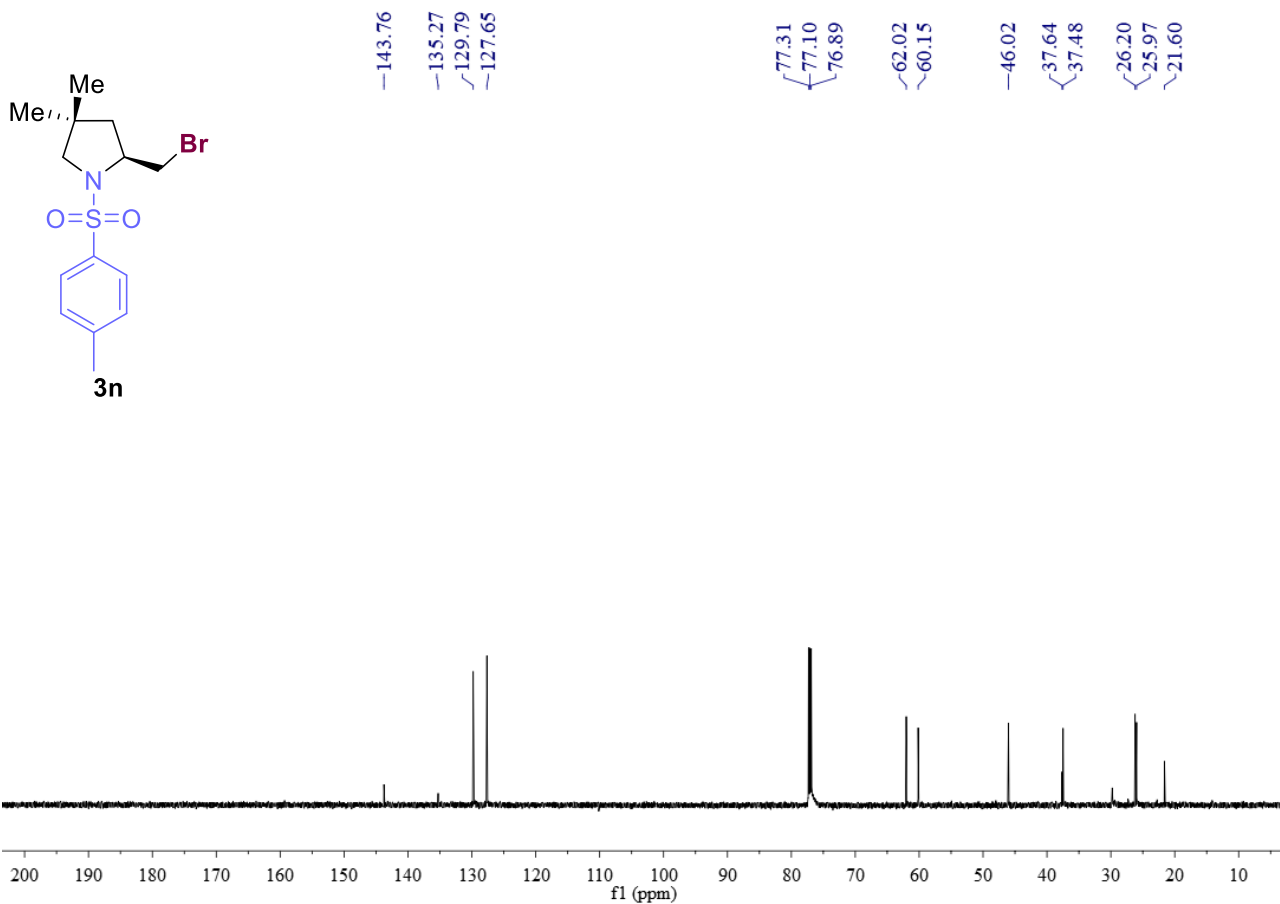

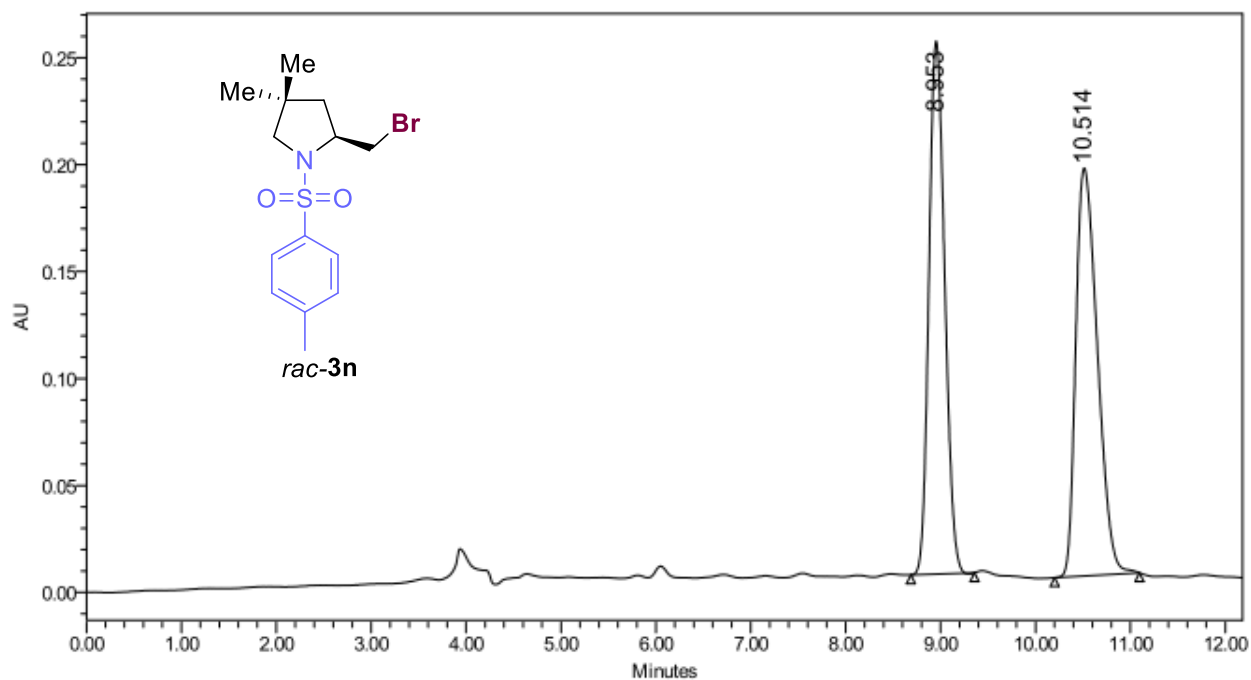

|   | RT (min) | Peak Type | Area ( $\mu\text{V}\cdot\text{sec}$ ) | % Area | Height ( $\mu\text{V}$ ) | % Height | Integration Type | Points Across Peak | Start Time (min) | End Time (min) |
|---|----------|-----------|---------------------------------------|--------|--------------------------|----------|------------------|--------------------|------------------|----------------|
| 1 | 8.953    | Unknown   | 2875152                               | 48.81  | 249110                   | 56.64    | bb               | 402                | 8.687            | 9.357          |
| 2 | 10.514   | Unknown   | 3015418                               | 51.19  | 190665                   | 43.36    | bb               | 536                | 10.202           | 11.095         |

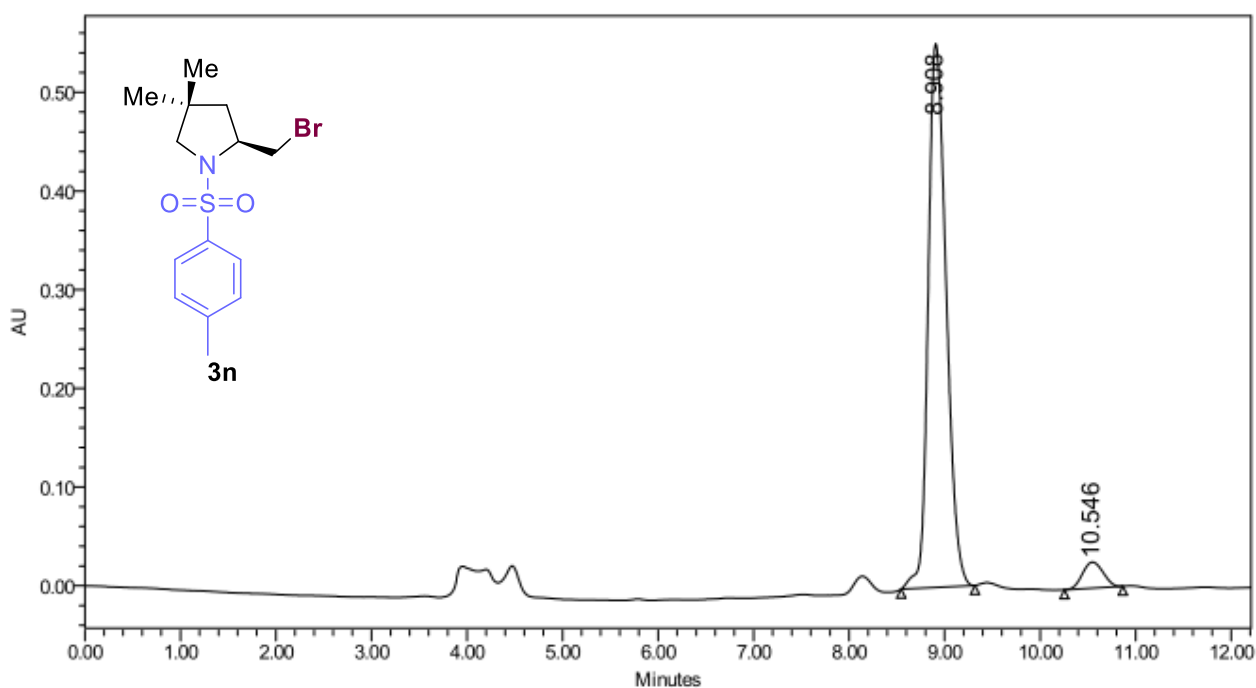

|   | RT (min) | Peak Type | Area ( $\mu\text{V}\cdot\text{sec}$ ) | % Area | Height ( $\mu\text{V}$ ) | % Height | Integration Type | Points Across Peak | Start Time (min) | End Time (min) |
|---|----------|-----------|---------------------------------------|--------|--------------------------|----------|------------------|--------------------|------------------|----------------|
| 1 | 8.908    | Unknown   | 7224560                               | 94.84  | 550942                   | 95.44    | bb               | 464                | 8.545            | 9.318          |
| 2 | 10.546   | Unknown   | 393155                                | 5.16   | 26300                    | 4.56     | bb               | 367                | 10.255           | 10.867         |

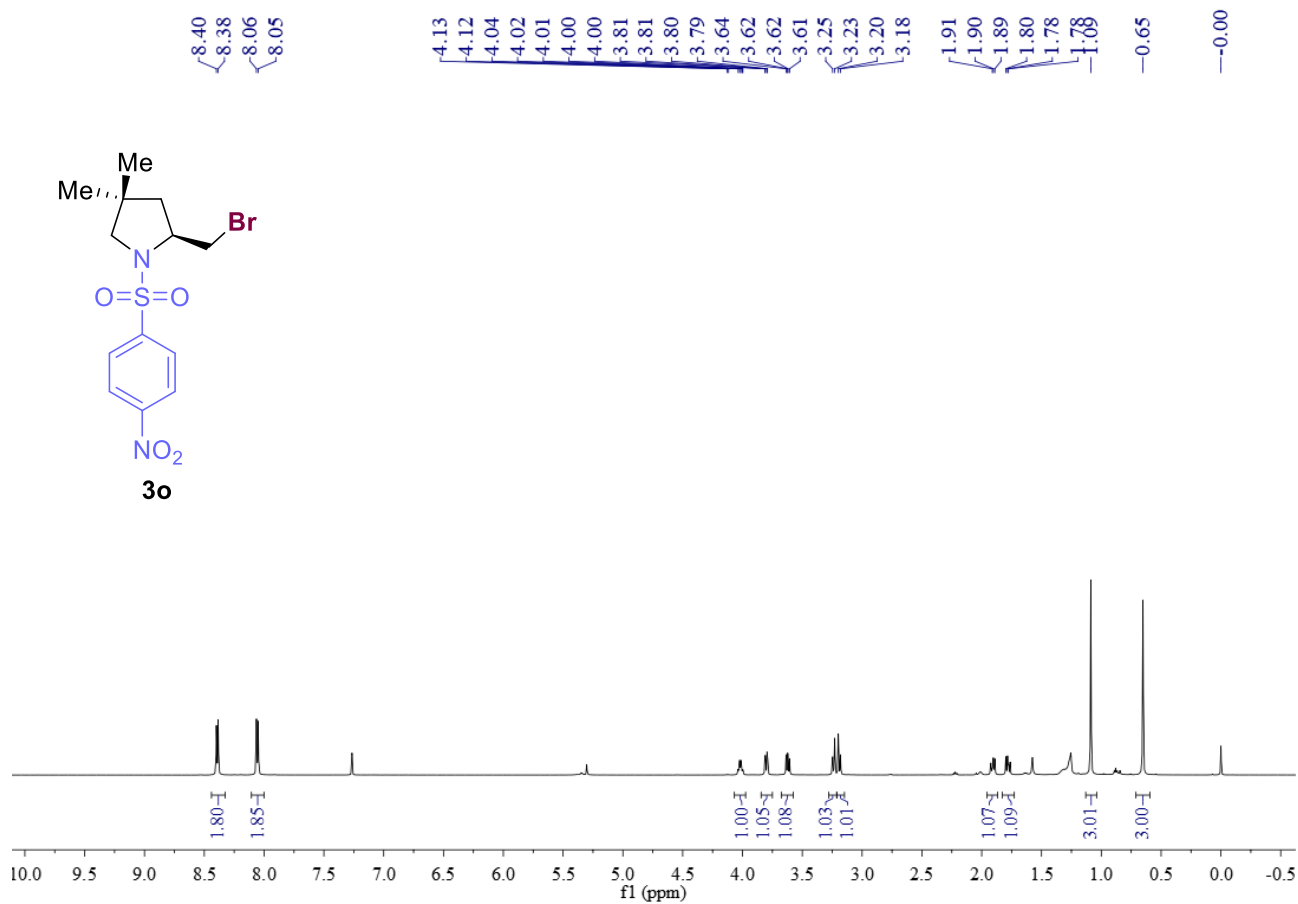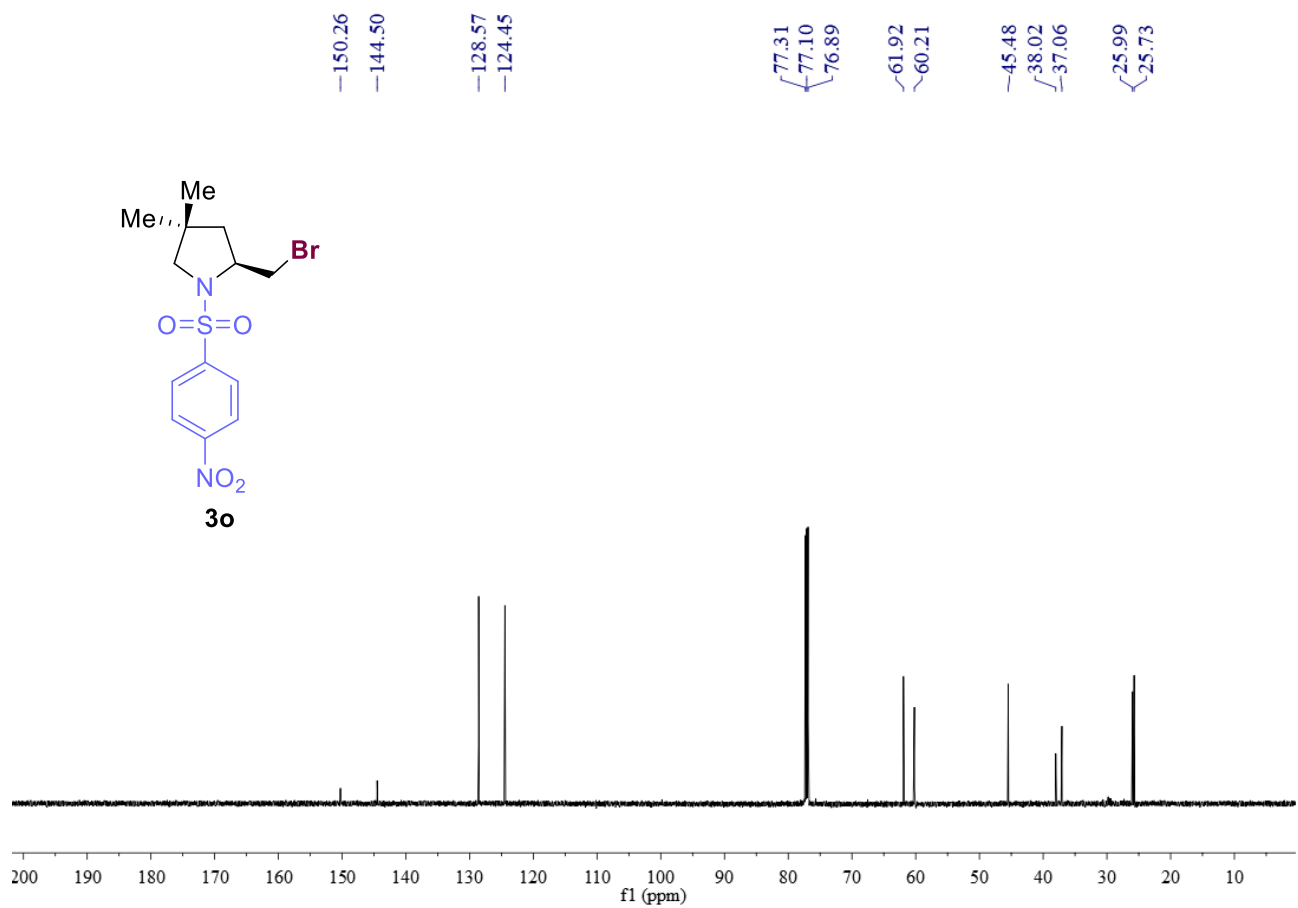

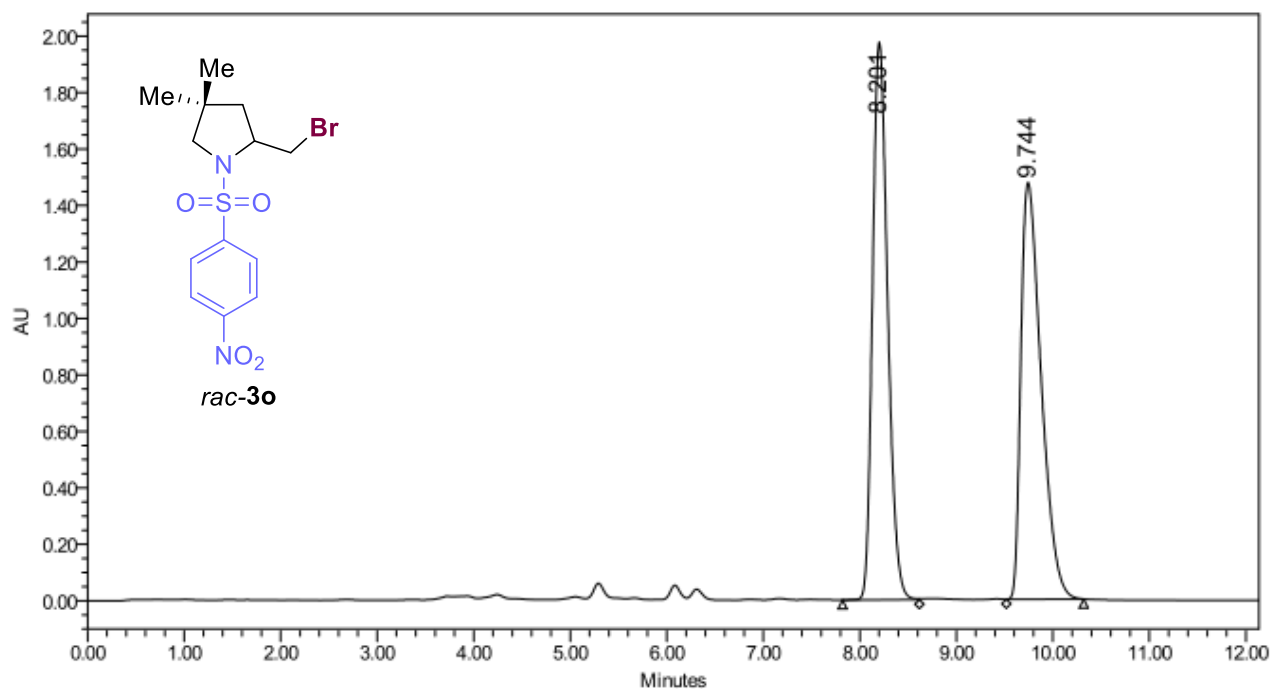

| RT (min) | Peak Type | Area (μV*sec) | % Area | Height (μV) | % Height | Integration Type | Points Across Peak | Start Time (min) | End Time (min) |
|----------|-----------|---------------|--------|-------------|----------|------------------|--------------------|------------------|----------------|
| 1        | Unknown   | 21473839      | 49.96  | 1975694     | 57.25    | BV               | 477                | 7.822            | 8.617          |
| 2        | Unknown   | 21510713      | 50.04  | 1475567     | 42.75    | Vb               | 481                | 9.517            | 10.318         |

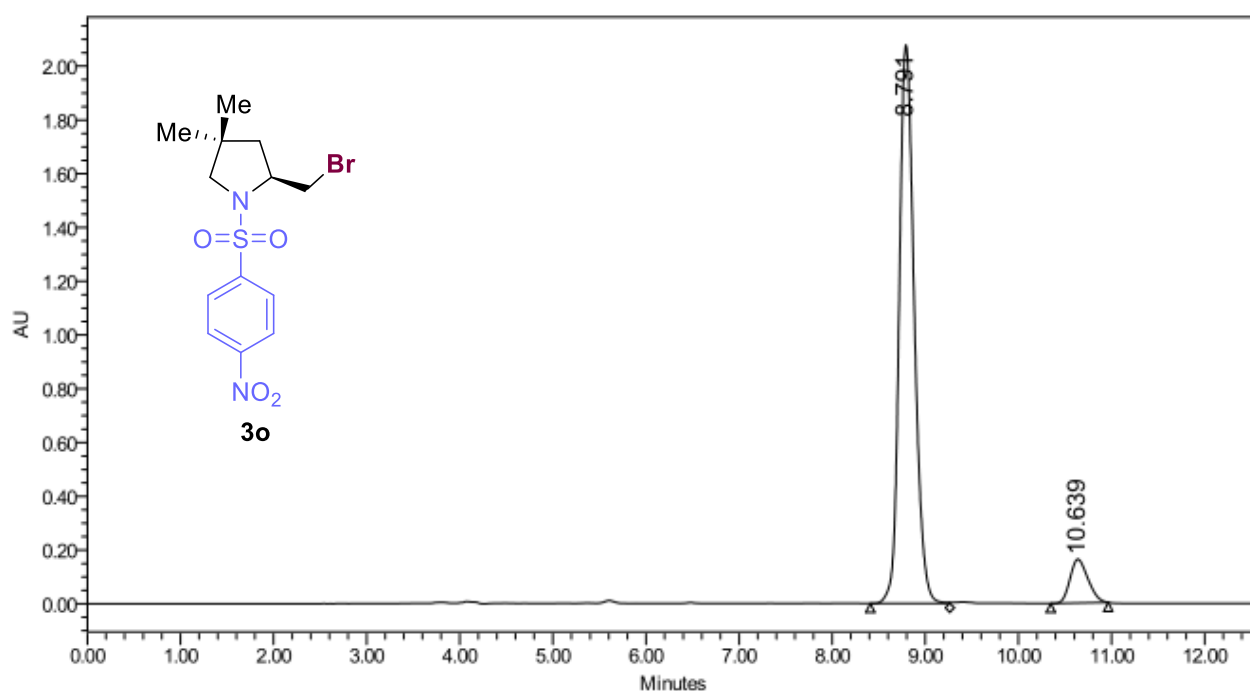

| RT (min) | Peak Type | Area (μV*sec) | % Area | Height (μV) | % Height | Integration Type | Points Across Peak | Start Time (min) | End Time (min) |
|----------|-----------|---------------|--------|-------------|----------|------------------|--------------------|------------------|----------------|
| 1        | Unknown   | 23333174      | 91.46  | 2077536     | 92.74    | BV               | 512                | 8.410            | 8.410          |
| 2        | Unknown   | 2179861       | 8.54   | 162698      | 7.26     | Bb               | 371                | 10.347           | 10.347         |

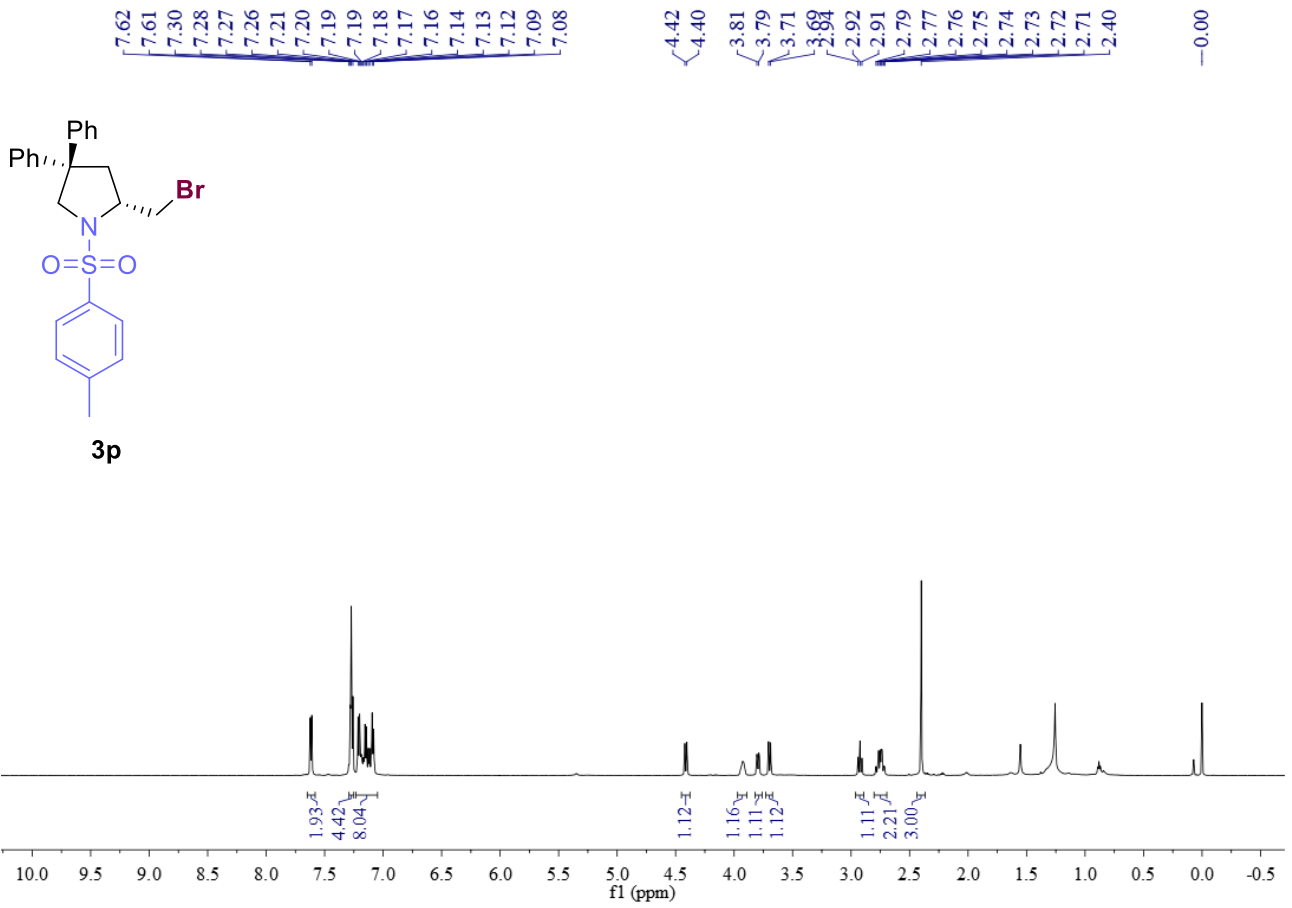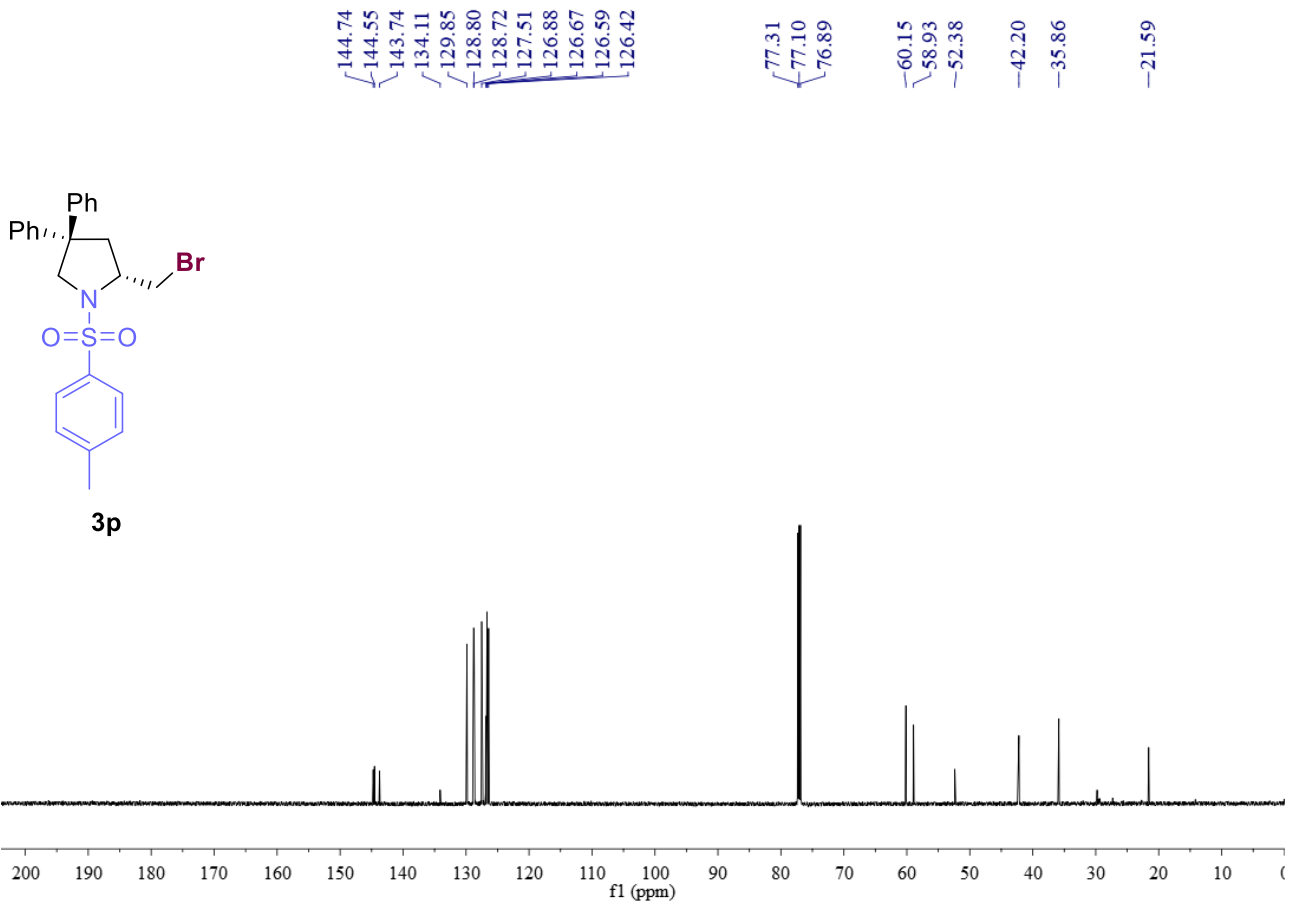

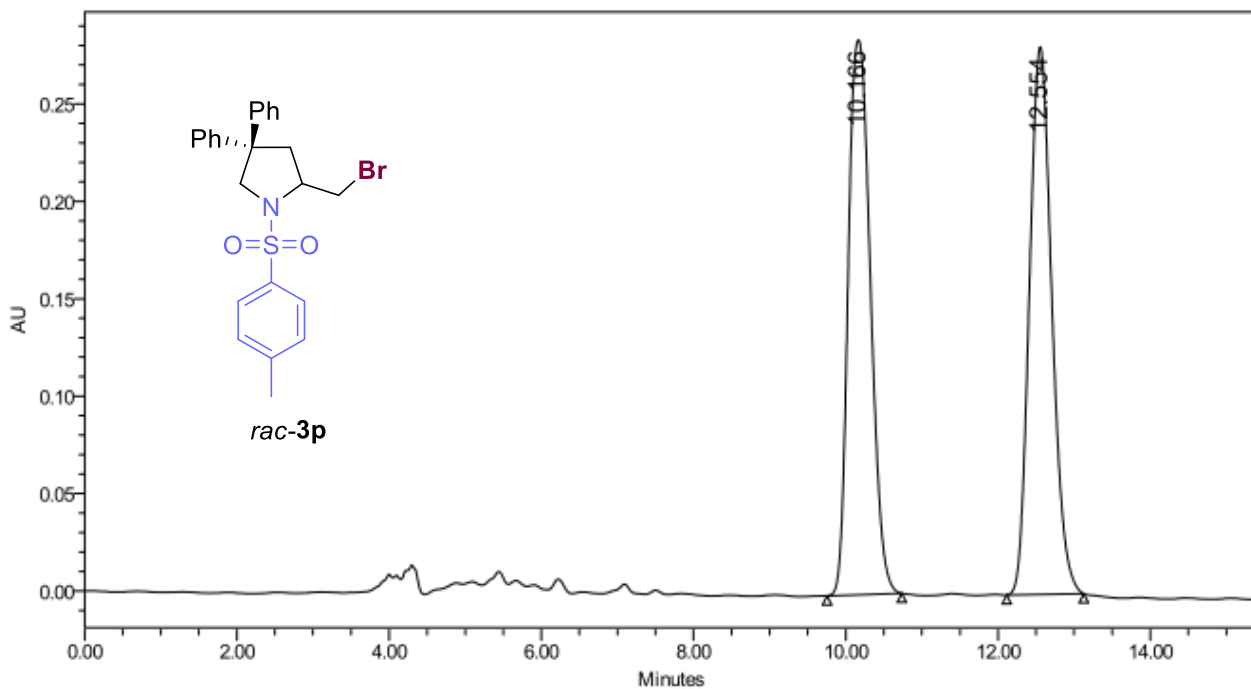

|   | RT (min) | Peak Type | Area ( $\mu\text{V}\cdot\text{sec}$ ) | % Area | Height ( $\mu\text{V}$ ) | % Height | Integration Type | Points Across Peak | Start Time (min) | End Time (min) |
|---|----------|-----------|---------------------------------------|--------|--------------------------|----------|------------------|--------------------|------------------|----------------|
| 1 | 10.166   | Unknown   | 5754113                               | 50.06  | 284794                   | 50.32    | BB               | 589                | 9.753            | 10.735         |
| 2 | 12.554   | Unknown   | 5740089                               | 49.94  | 281162                   | 49.68    | BB               | 608                | 12.113           | 13.127         |

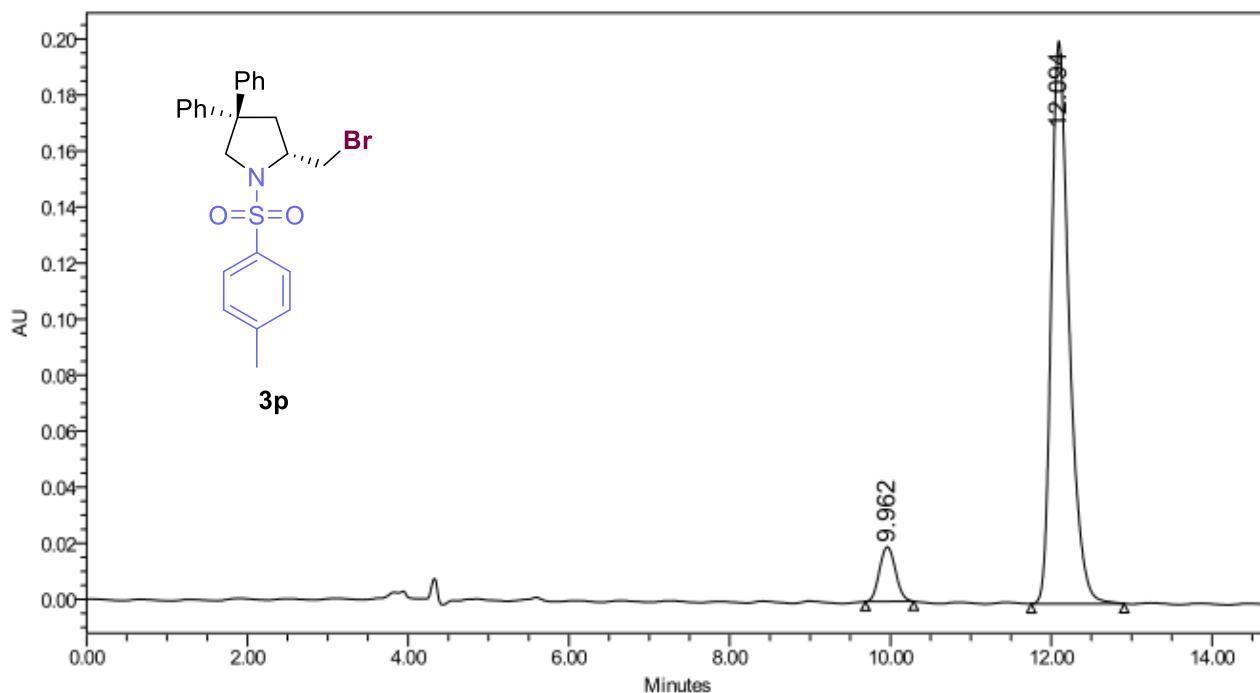

|   | RT (min) | Peak Type | Area ( $\mu\text{V}\cdot\text{sec}$ ) | % Area | Height ( $\mu\text{V}$ ) | % Height | Integration Type | Points Across Peak | Start Time (min) | End Time (min) |
|---|----------|-----------|---------------------------------------|--------|--------------------------|----------|------------------|--------------------|------------------|----------------|
| 1 | 9.962    | Unknown   | 268938                                | 7.98   | 19404                    | 8.81     | bb               | 360                | 9.688            | 10.288         |
| 2 | 12.094   | Unknown   | 3099779                               | 92.02  | 200850                   | 91.19    | BB               | 694                | 11.752           | 12.908         |

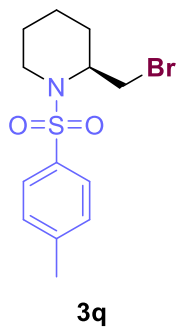

7.73  
7.72  
7.31  
7.29  
7.27

4.27  
4.26  
4.26  
3.51  
3.49  
3.42  
2.94  
2.92  
2.43  
2.04  
2.02  
1.61  
1.55  
1.53  
1.48  
1.47  
1.45  
1.45  
0.66

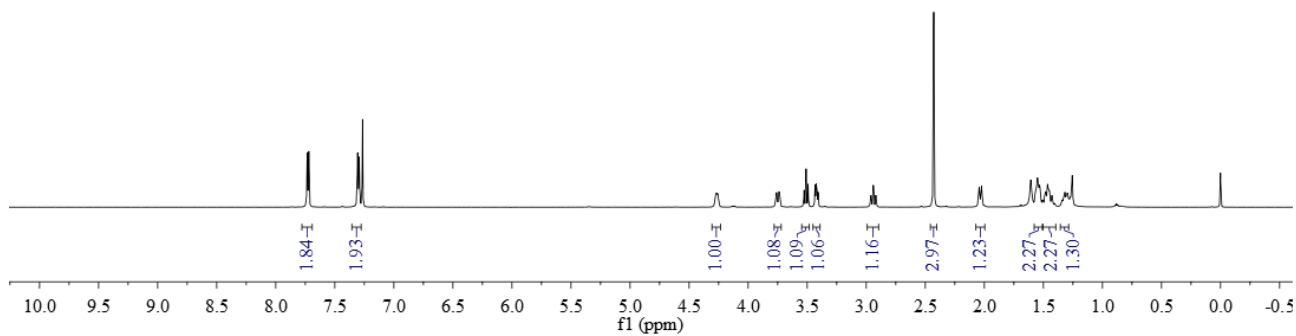

-143.40  
-138.16  
-129.85  
-127.13

77.31  
77.10  
76.89

-53.50

-41.15

30.40  
25.28  
24.43  
21.59  
18.03

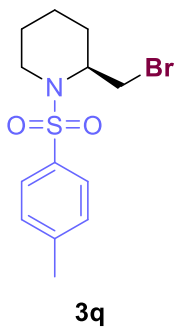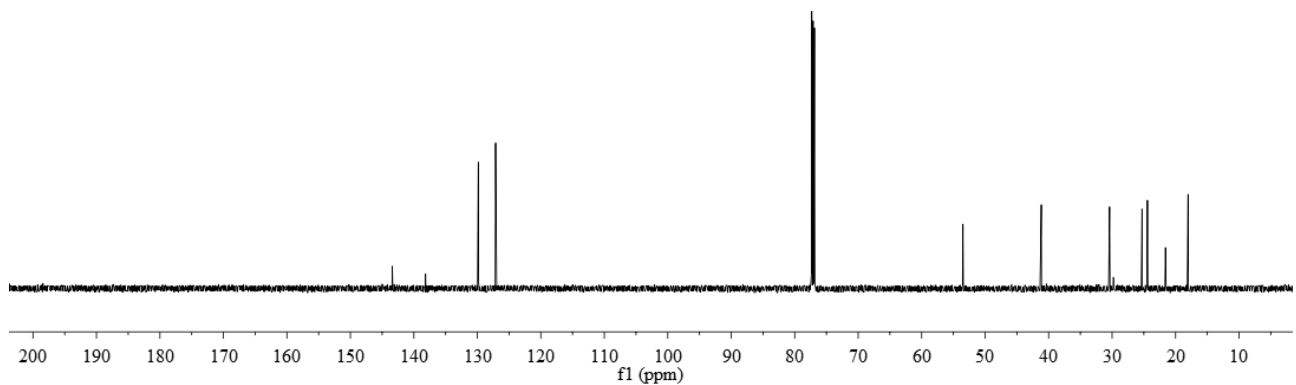



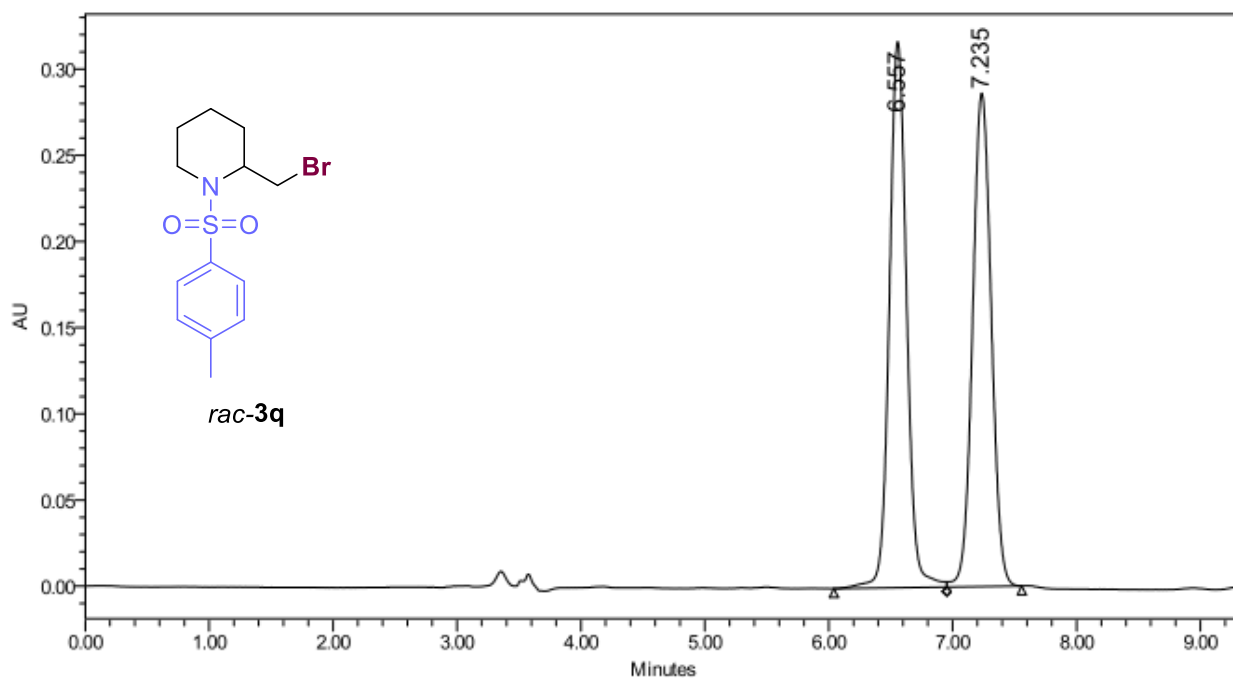

|   | RT (min) | Peak Type | Area ( $\mu\text{V}\cdot\text{sec}$ ) | % Area | Height ( $\mu\text{V}$ ) | % Height | Integration Type | Points Across Peak | Start Time (min) | End Time (min) |
|---|----------|-----------|---------------------------------------|--------|--------------------------|----------|------------------|--------------------|------------------|----------------|
| 1 | 6.557    | Unknown   | 3071504                               | 50.62  | 316829                   | 52.53    | BV               | 547                | 6.042            | 6.953          |
| 2 | 7.235    | Unknown   | 2996666                               | 49.38  | 286254                   | 47.47    | VB               | 363                | 6.953            | 7.558          |

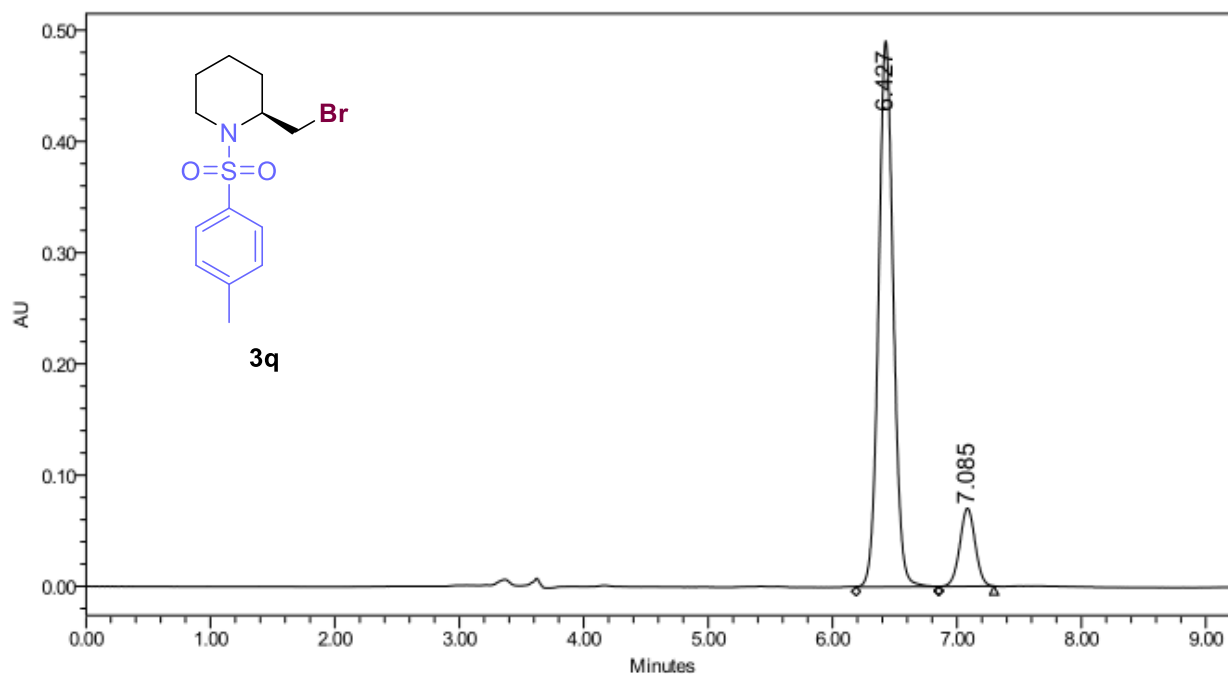

|   | RT (min) | Peak Type | Area ( $\mu\text{V}\cdot\text{sec}$ ) | % Area | Height ( $\mu\text{V}$ ) | % Height | Integration Type | Points Across Peak | Start Time (min) | End Time (min) |
|---|----------|-----------|---------------------------------------|--------|--------------------------|----------|------------------|--------------------|------------------|----------------|
| 1 | 6.427    | Unknown   | 4056508                               | 87.03  | 490738                   | 87.48    | VV               | 398                | 6.188            | 6.852          |
| 2 | 7.085    | Unknown   | 604434                                | 12.97  | 70217                    | 12.52    | Vb               | 268                | 6.852            | 7.298          |

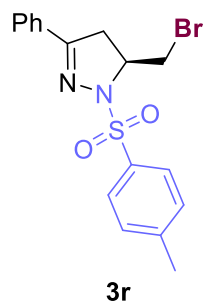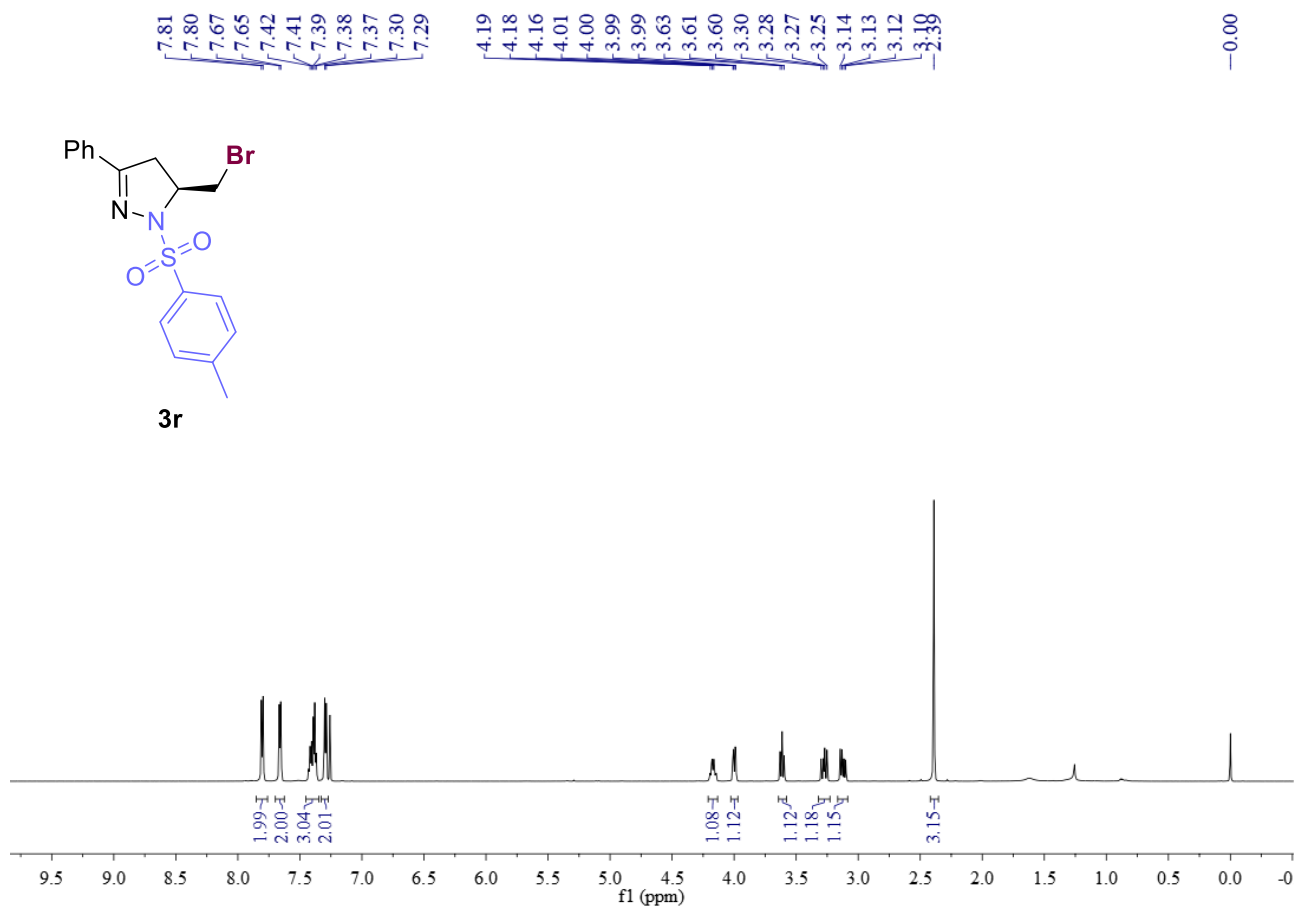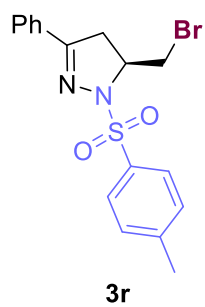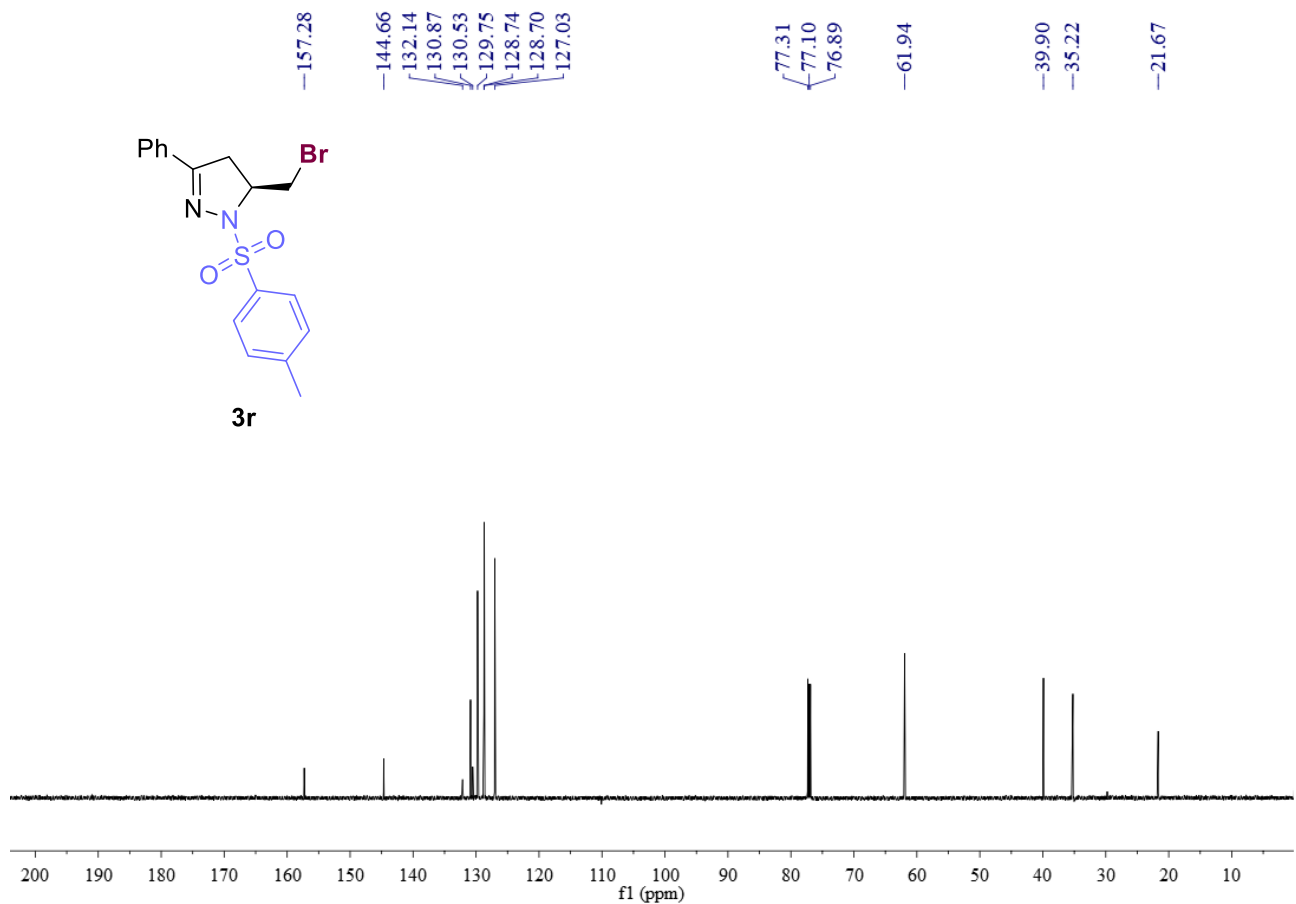

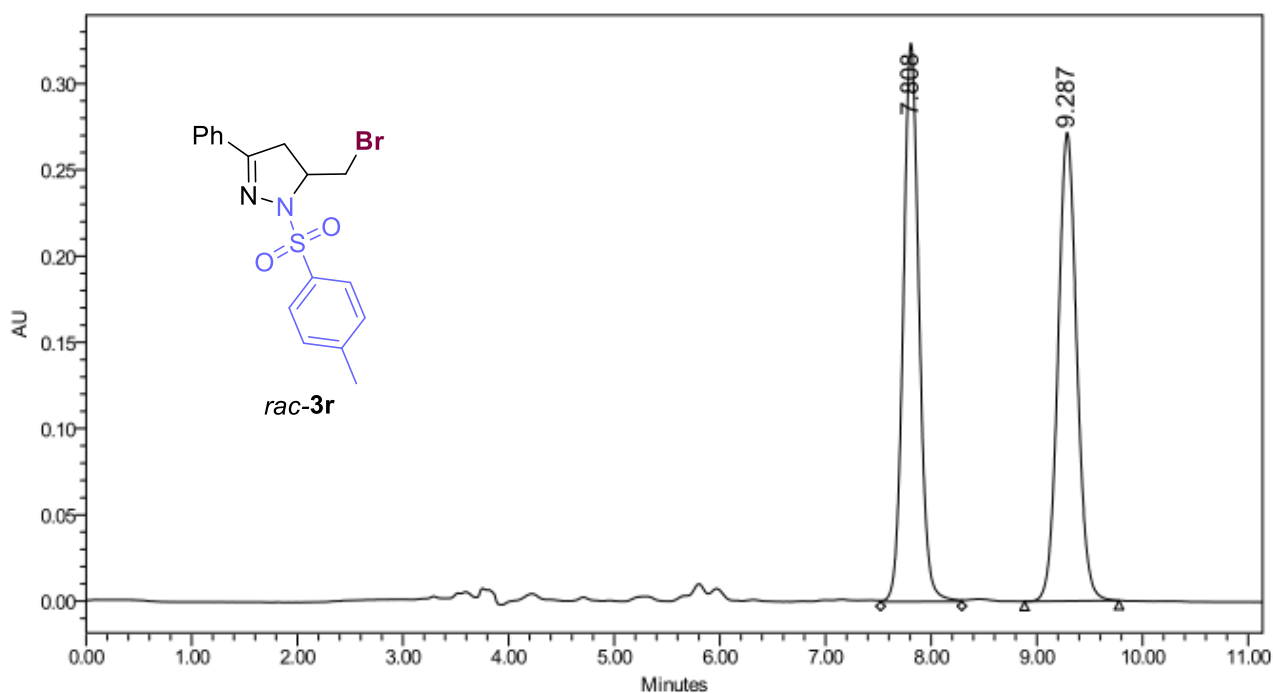

|   | RT (min) | Peak Type | Area ( $\mu\text{V}\cdot\text{sec}$ ) | % Area | Height ( $\mu\text{V}$ ) | % Height | Integration Type | Points Across Peak | Start Time (min) | End Time (min) |
|---|----------|-----------|---------------------------------------|--------|--------------------------|----------|------------------|--------------------|------------------|----------------|
| 1 | 7.808    | Unknown   | 3367452                               | 49.99  | 323710                   | 54.38    | VV               | 461                | 7.522            | 8.290          |
| 2 | 9.287    | Unknown   | 3368899                               | 50.01  | 271591                   | 45.62    | Bb               | 537                | 8.883            | 9.778          |

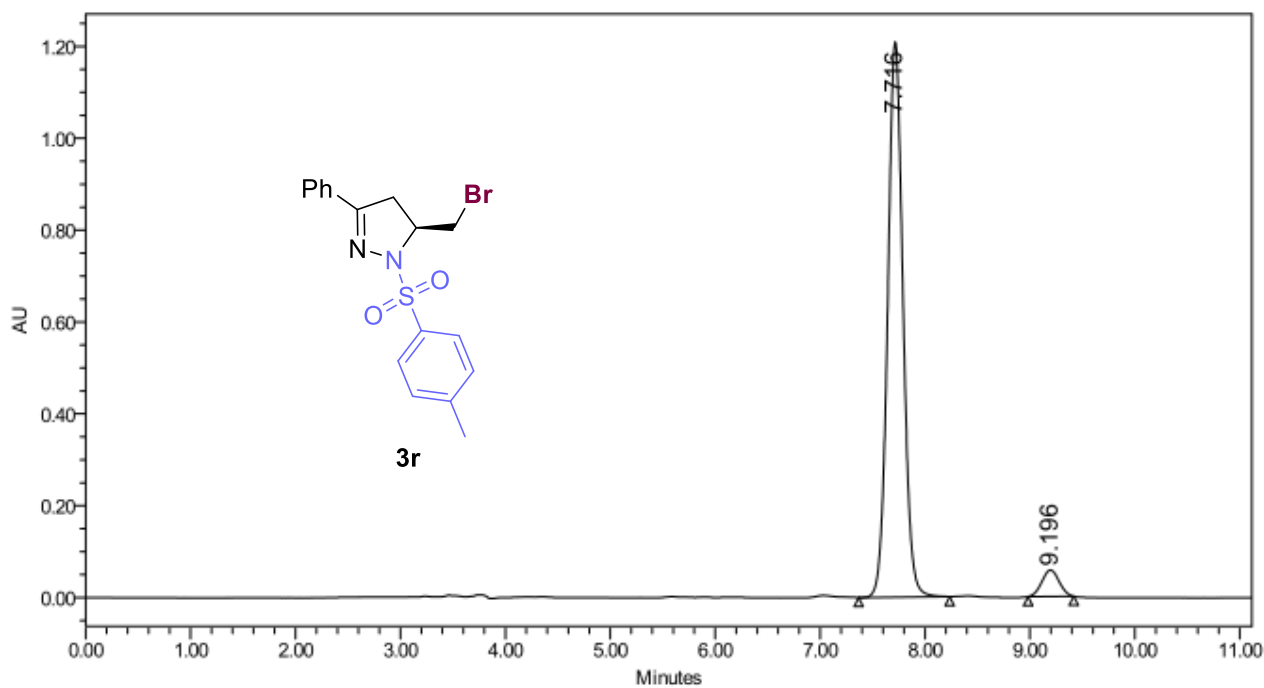

|   | RT (min) | Peak Type | Area ( $\mu\text{V}\cdot\text{sec}$ ) | % Area | Height ( $\mu\text{V}$ ) | % Height | Integration Type | Points Across Peak | Start Time (min) | End Time (min) |
|---|----------|-----------|---------------------------------------|--------|--------------------------|----------|------------------|--------------------|------------------|----------------|
| 1 | 7.716    | Unknown   | 12225838                              | 94.90  | 1209146                  | 95.47    | bb               | 521                | 7.367            | 8.235          |
| 2 | 9.196    | Unknown   | 656865                                | 5.10   | 57423                    | 4.53     | bb               | 260                | 8.983            | 9.417          |

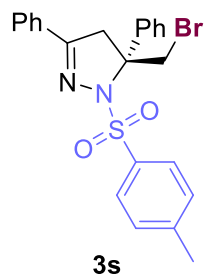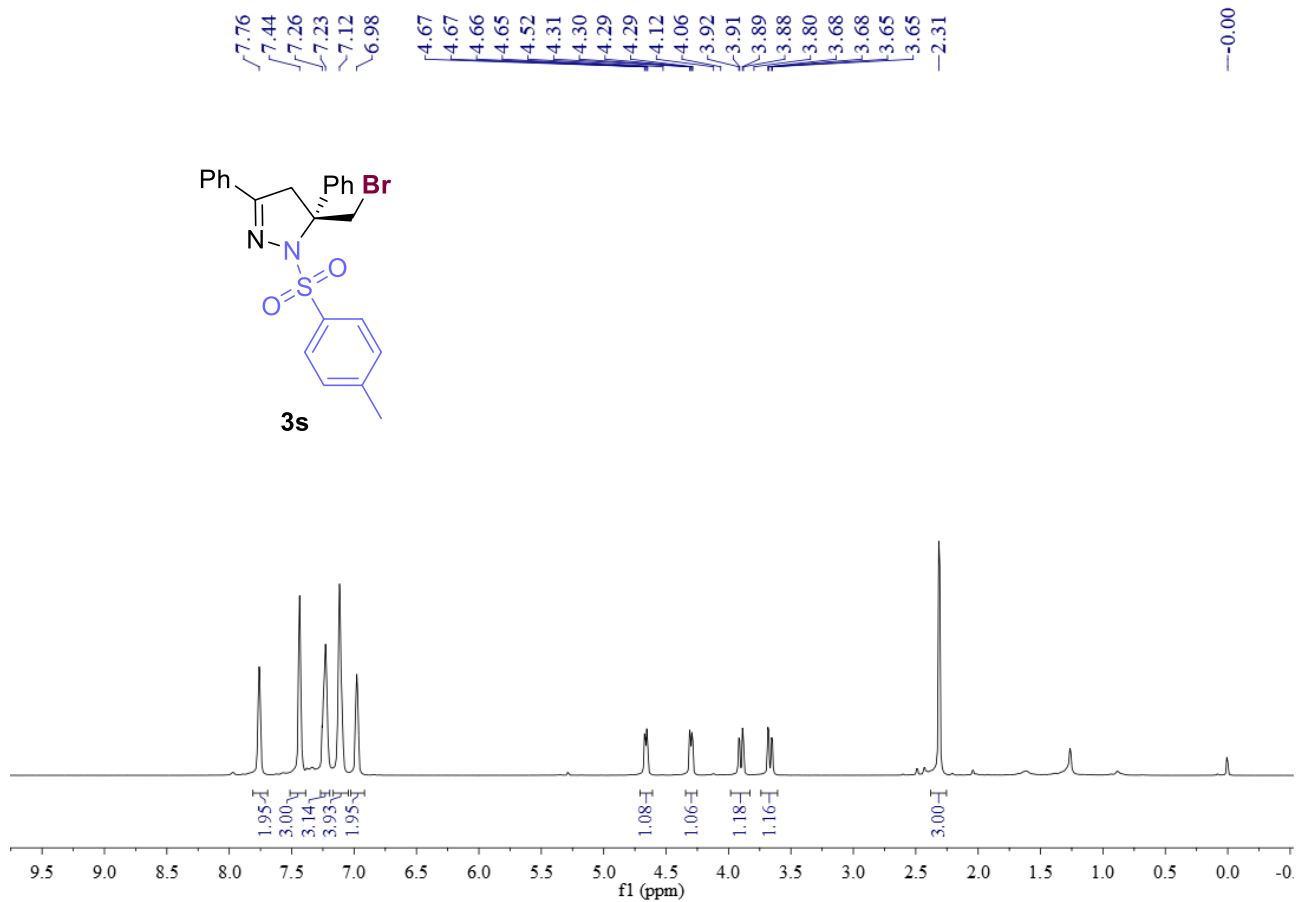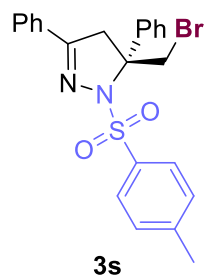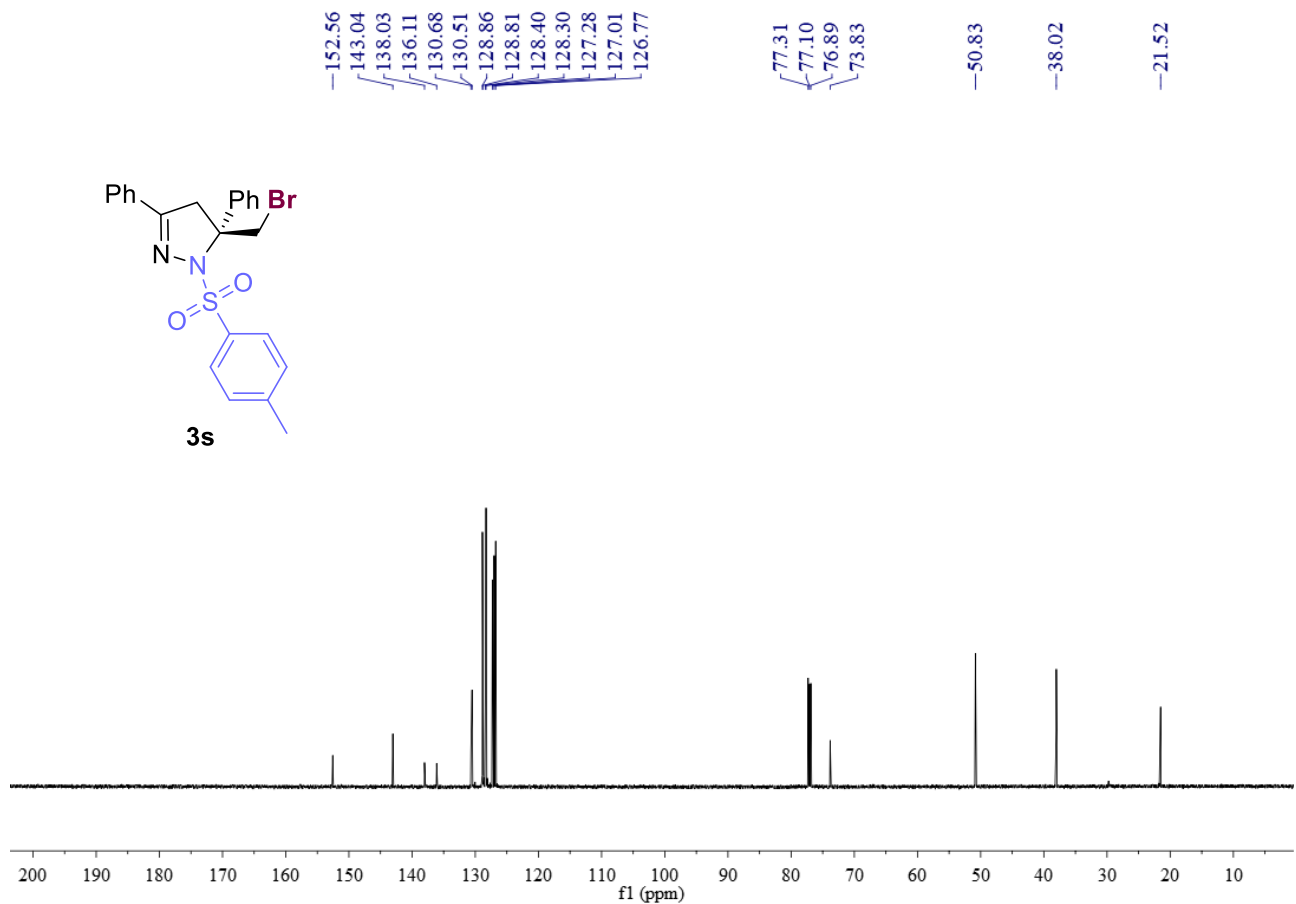

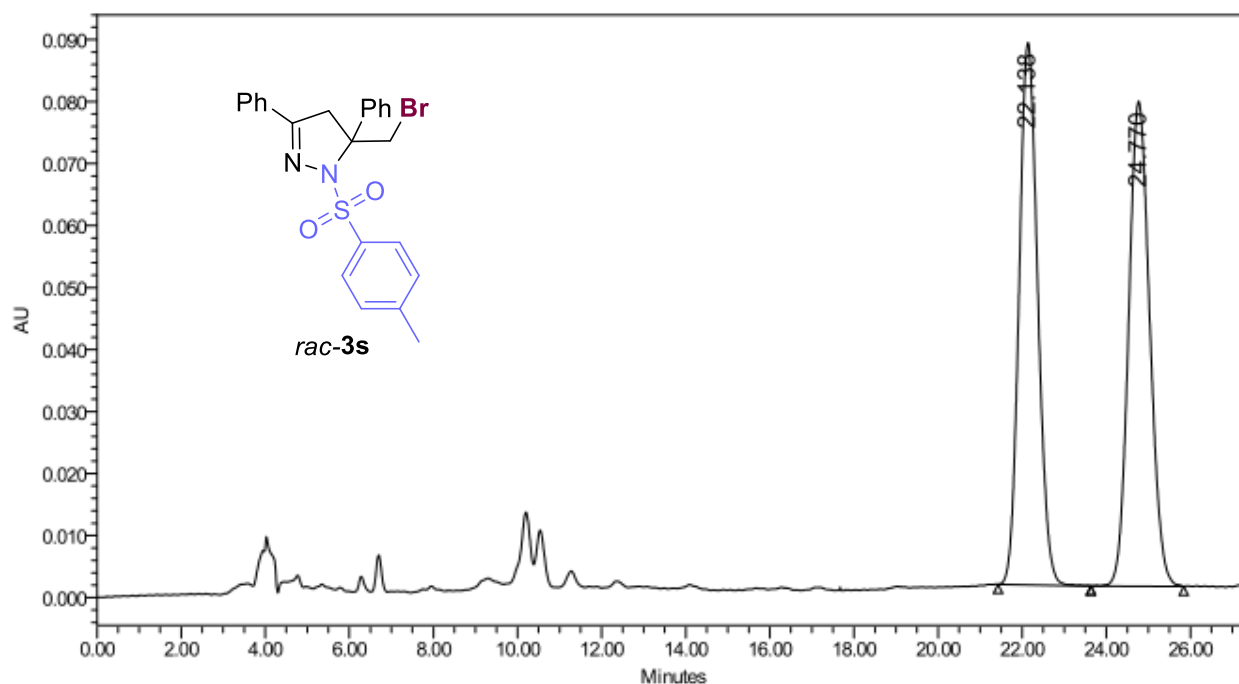

|   | RT (min) | Peak Type | Area ( $\mu\text{V}\cdot\text{sec}$ ) | % Area | Height ( $\mu\text{V}$ ) | % Height | Integration Type | Points Across Peak | Start Time (min) | End Time (min) |
|---|----------|-----------|---------------------------------------|--------|--------------------------|----------|------------------|--------------------|------------------|----------------|
| 1 | 22.138   | Unknown   | 2689415                               | 49.71  | 87448                    | 52.79    | BB               | 1327               | 21.423           | 23.635         |
| 2 | 24.770   | Unknown   | 2720816                               | 50.29  | 78200                    | 47.21    | BB               | 1323               | 23.635           | 25.840         |

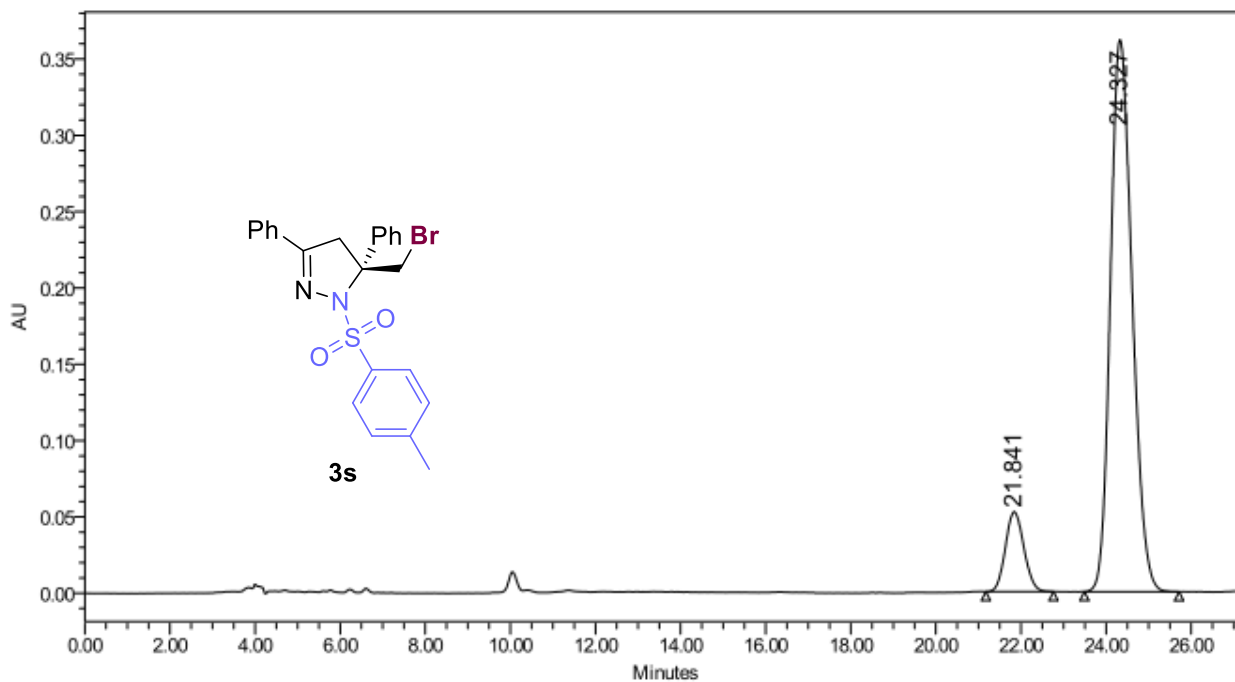

|   | RT (min) | Peak Type | Area ( $\mu\text{V}\cdot\text{sec}$ ) | % Area | Height ( $\mu\text{V}$ ) | % Height | Integration Type | Points Across Peak | Start Time (min) | End Time (min) |
|---|----------|-----------|---------------------------------------|--------|--------------------------|----------|------------------|--------------------|------------------|----------------|
| 1 | 21.841   | Unknown   | 1585364                               | 11.00  | 52331                    | 12.64    | BB               | 951                | 21.177           | 22.762         |
| 2 | 24.327   | Unknown   | 12832494                              | 89.00  | 361588                   | 87.36    | BB               | 1336               | 23.488           | 25.715         |

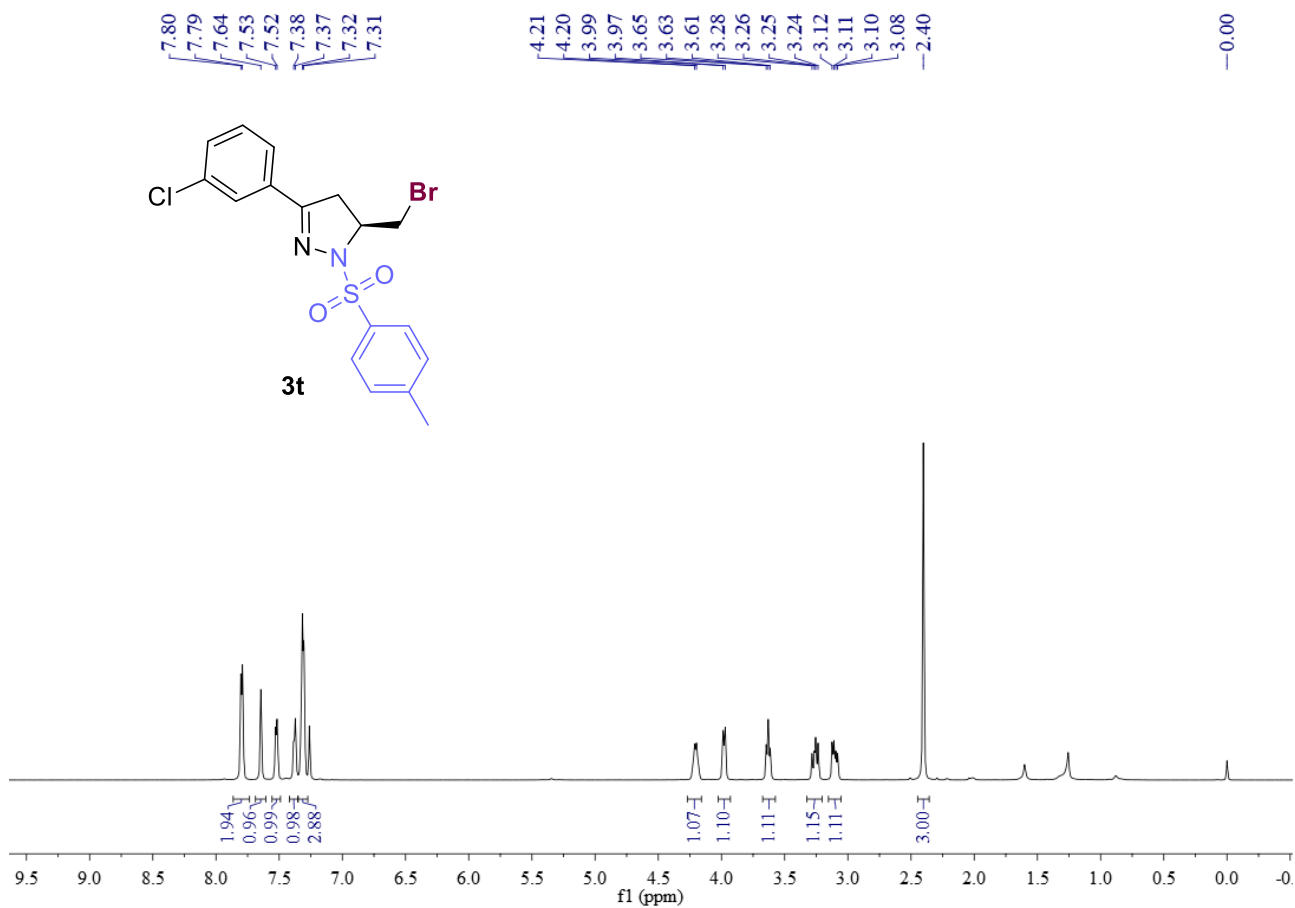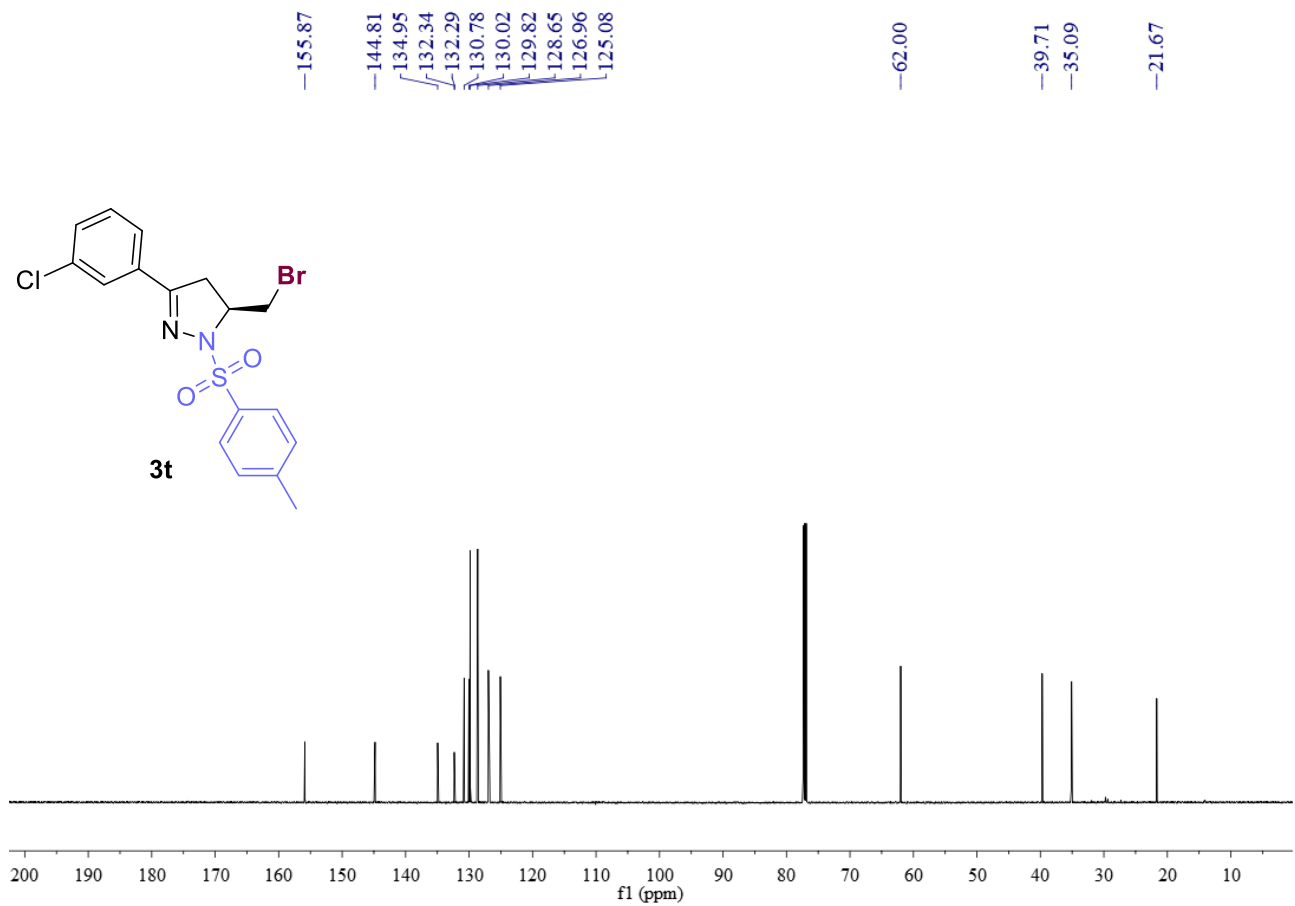

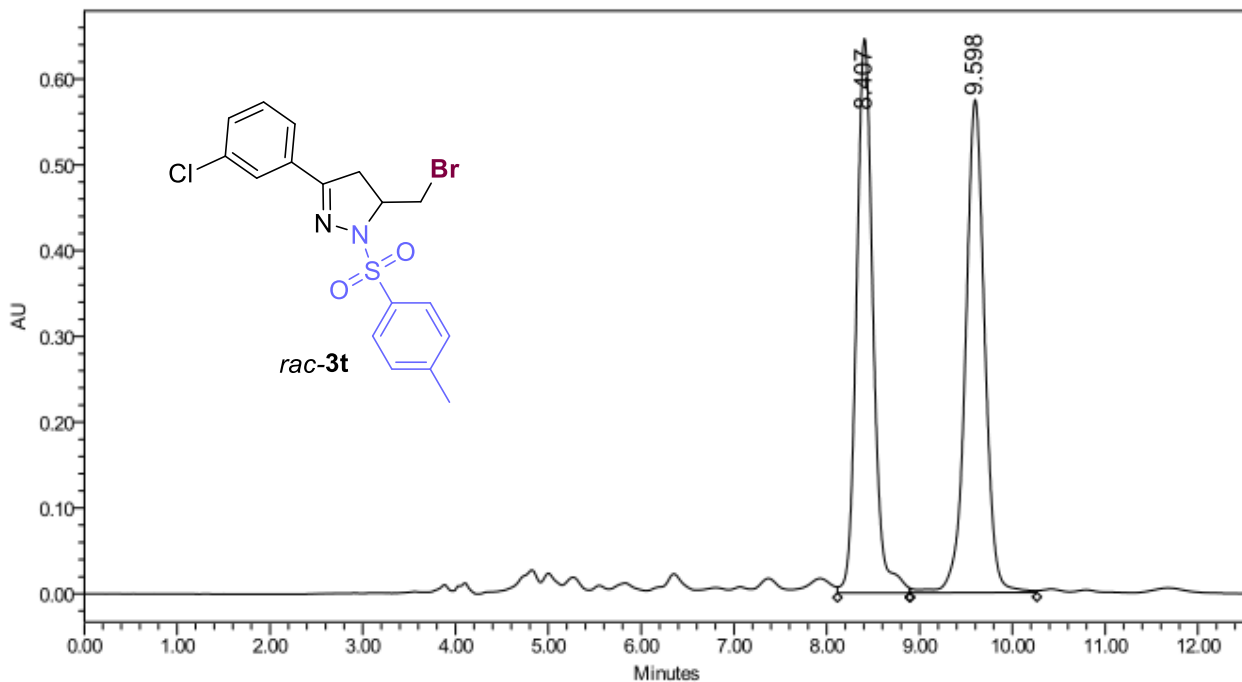

|   | RT (min) | Peak Type | Area ( $\mu\text{V}\cdot\text{sec}$ ) | % Area | Height ( $\mu\text{V}$ ) | % Height | Integration Type | Points Across Peak | Start Time (min) | End Time (min) |
|---|----------|-----------|---------------------------------------|--------|--------------------------|----------|------------------|--------------------|------------------|----------------|
| 1 | 8.407    | Unknown   | 8000839                               | 49.22  | 646115                   | 52.93    | Vv               | 468                | 8.115            | 8.895          |
| 2 | 9.598    | Unknown   | 8254799                               | 50.78  | 574482                   | 47.07    | vV               | 822                | 8.895            | 10.265         |

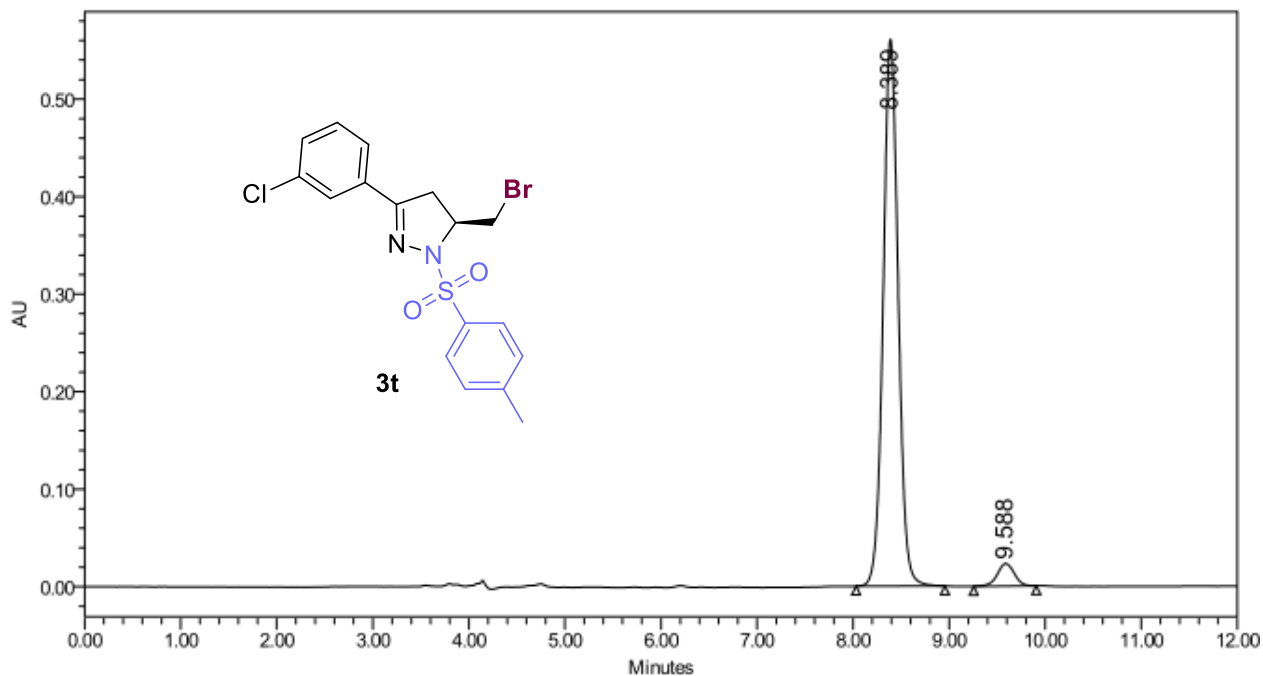

|   | RT (min) | Peak Type | Area ( $\mu\text{V}\cdot\text{sec}$ ) | % Area | Height ( $\mu\text{V}$ ) | % Height | Integration Type | Points Across Peak | Start Time (min) | End Time (min) |
|---|----------|-----------|---------------------------------------|--------|--------------------------|----------|------------------|--------------------|------------------|----------------|
| 1 | 8.389    | Unknown   | 6094271                               | 95.56  | 560813                   | 96.07    | BB               | 554                | 8.032            | 8.955          |
| 2 | 9.588    | Unknown   | 282894                                | 4.44   | 22932                    | 3.93     | BB               | 391                | 9.255            | 9.907          |

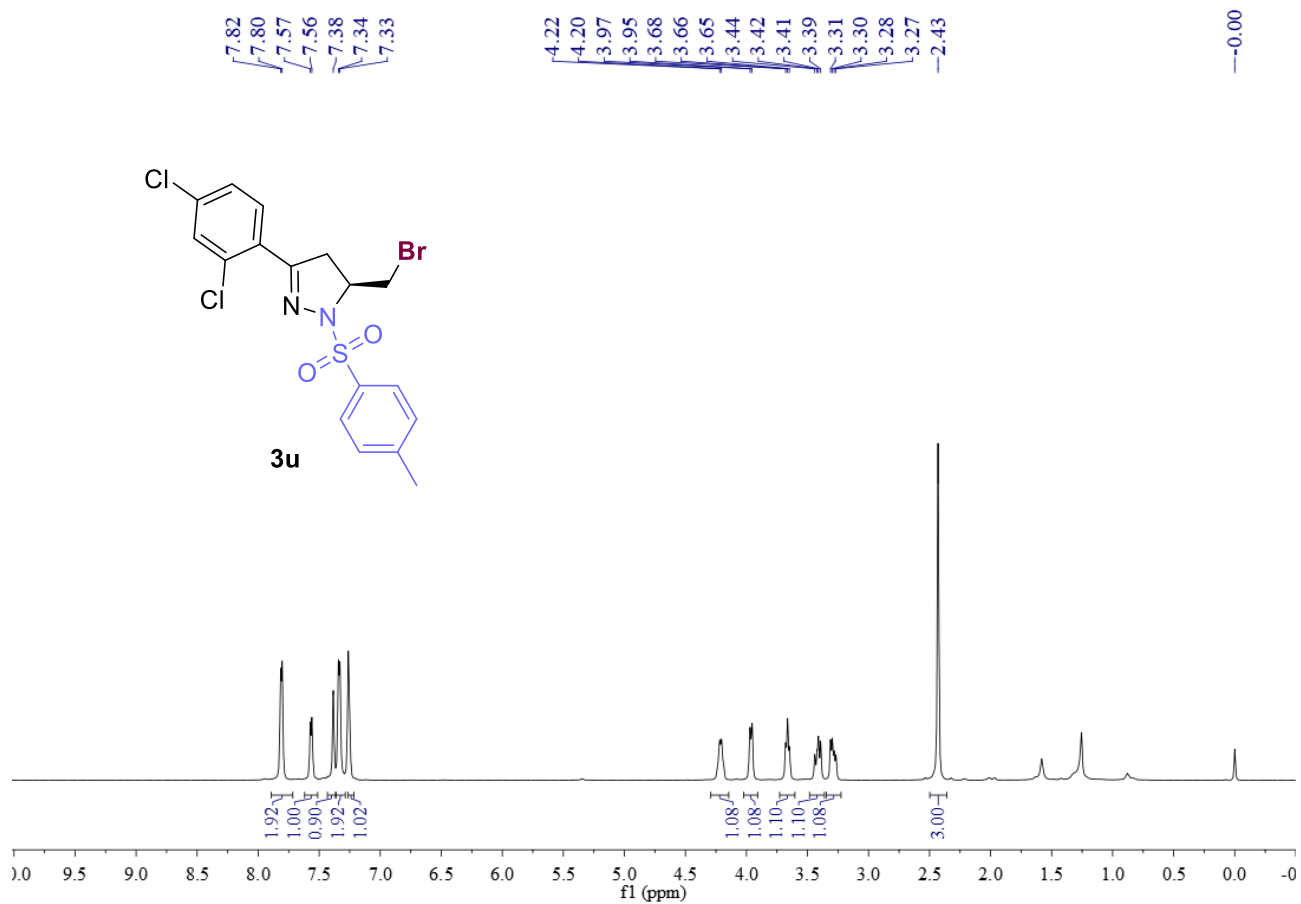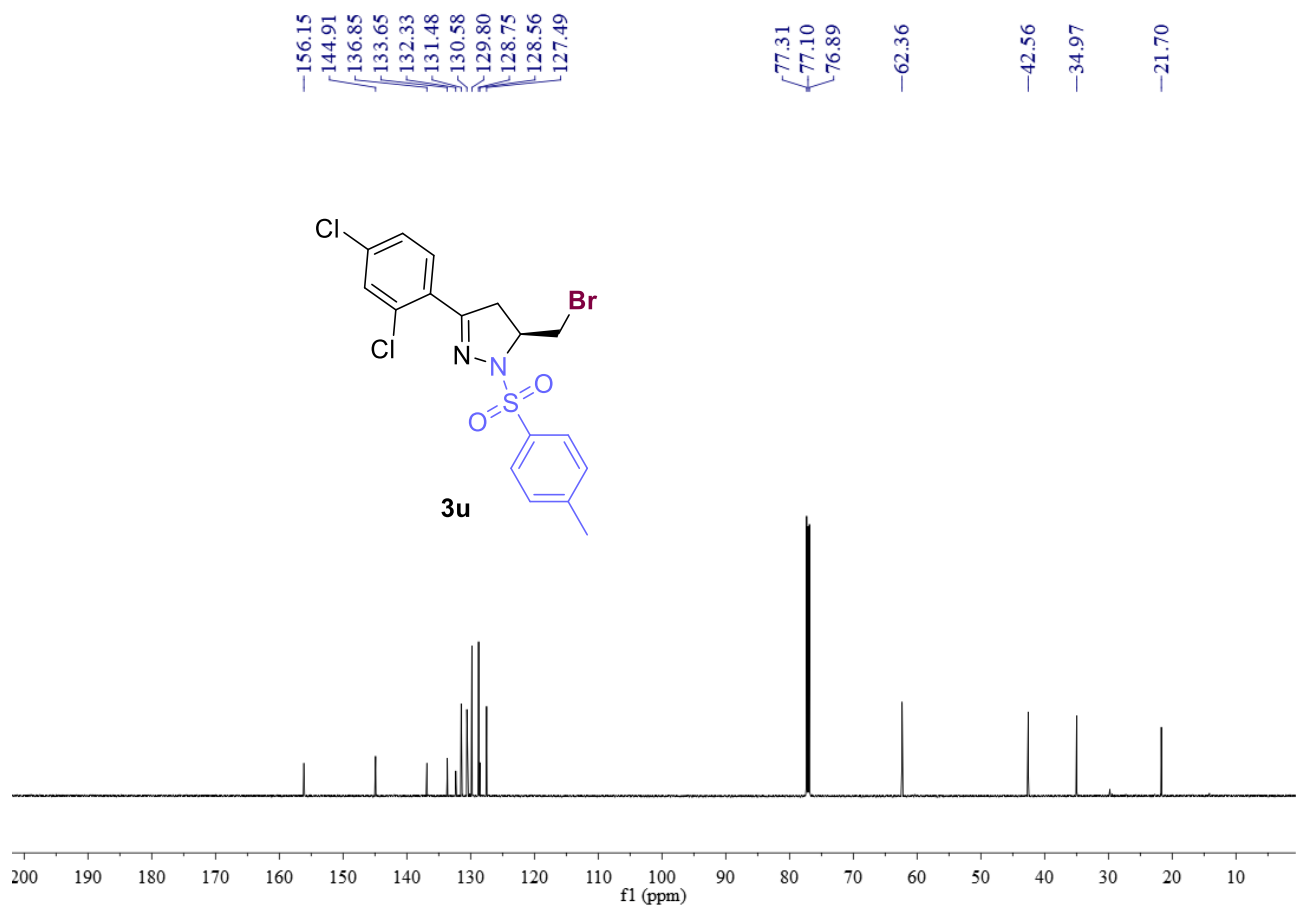



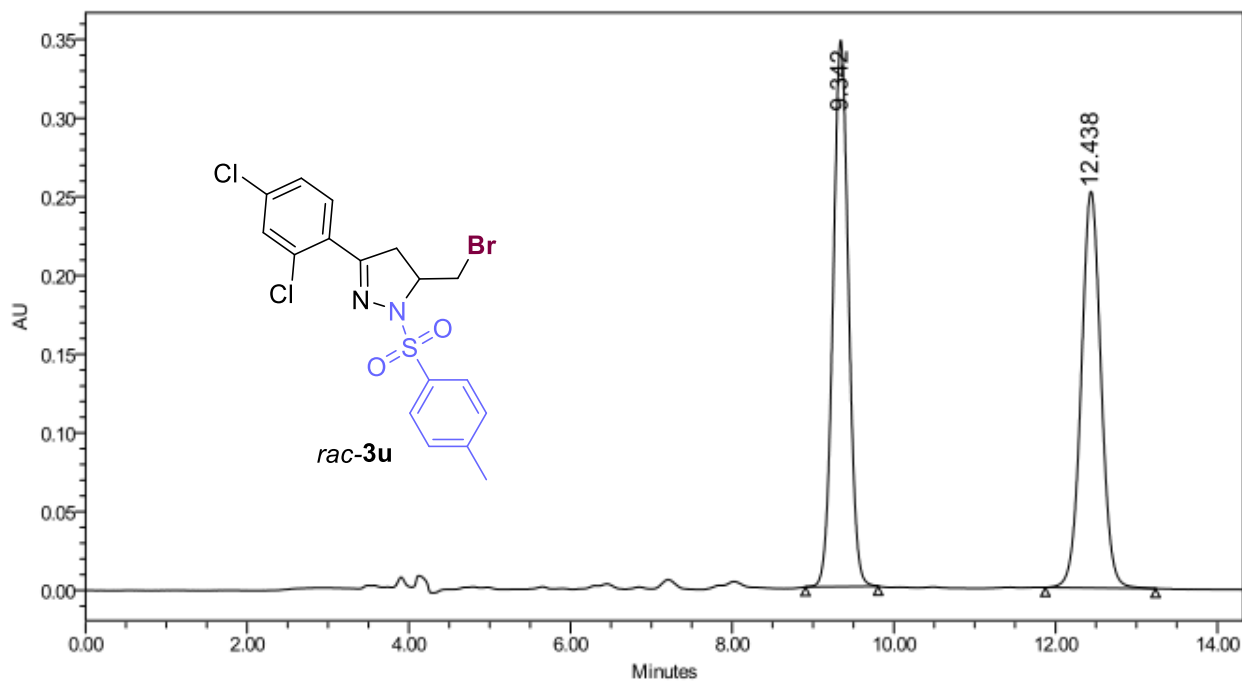

|   | RT (min) | Peak Type | Area ( $\mu\text{V}\cdot\text{sec}$ ) | % Area | Height ( $\mu\text{V}$ ) | % Height | Integration Type | Points Across Peak | Start Time (min) | End Time (min) |
|---|----------|-----------|---------------------------------------|--------|--------------------------|----------|------------------|--------------------|------------------|----------------|
| 1 | 9.342    | Unknown   | 4623967                               | 51.89  | 347138                   | 57.95    | bb               | 539                | 8.907            | 9.805          |
| 2 | 12.438   | Unknown   | 4286547                               | 48.11  | 251912                   | 42.05    | bb               | 819                | 11.873           | 13.238         |

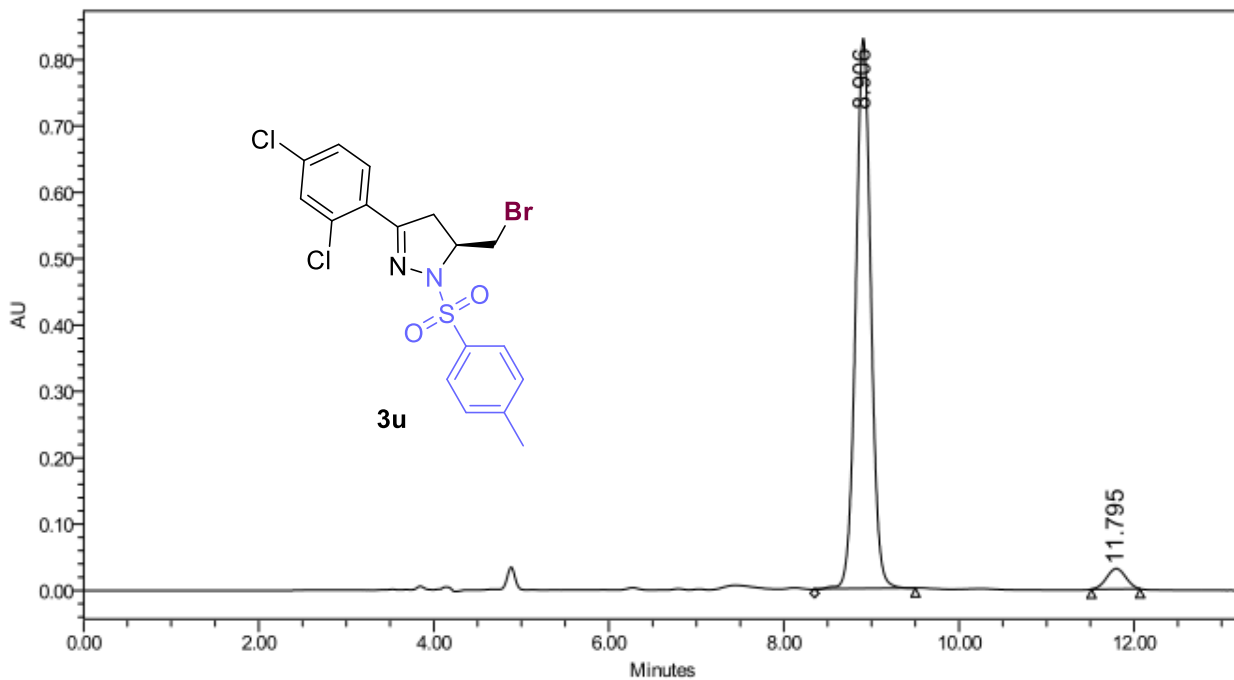

|   | RT (min) | Peak Type | Area ( $\mu\text{V}\cdot\text{sec}$ ) | % Area | Height ( $\mu\text{V}$ ) | % Height | Integration Type | Points Across Peak | Start Time (min) | End Time (min) |
|---|----------|-----------|---------------------------------------|--------|--------------------------|----------|------------------|--------------------|------------------|----------------|
| 1 | 8.906    | Unknown   | 9969301                               | 95.51  | 828834                   | 96.42    | Vb               | 691                | 8.350            | 9.502          |
| 2 | 11.795   | Unknown   | 468976                                | 4.49   | 30817                    | 3.58     | bb               | 334                | 11.512           | 12.068         |

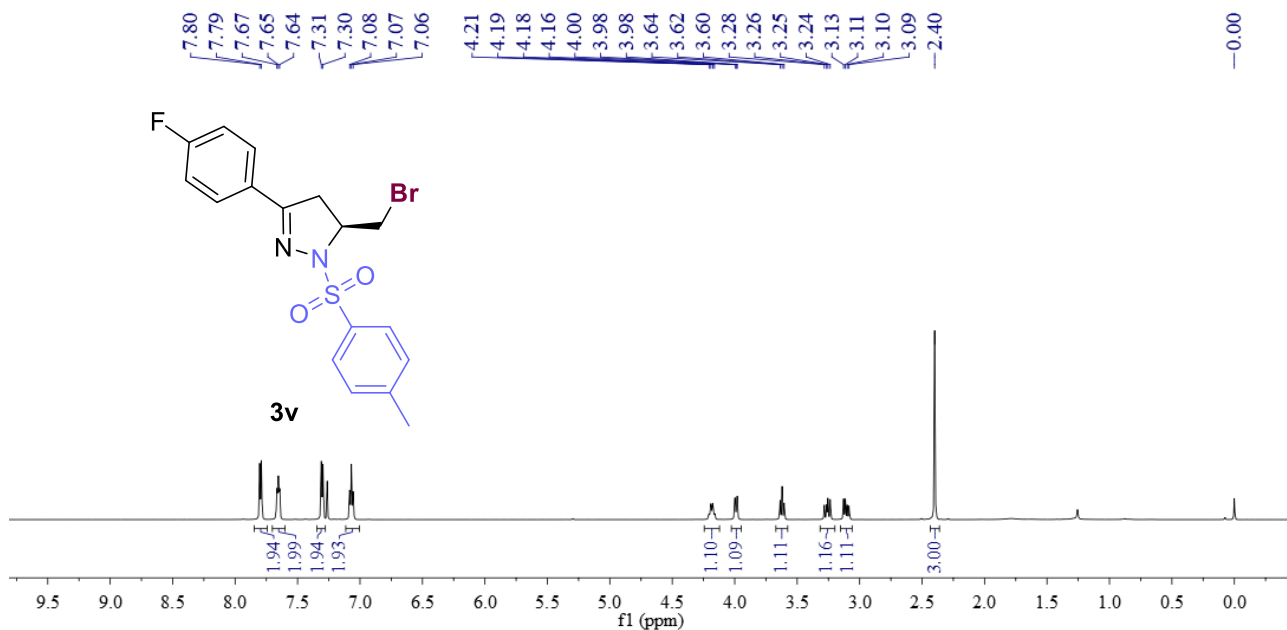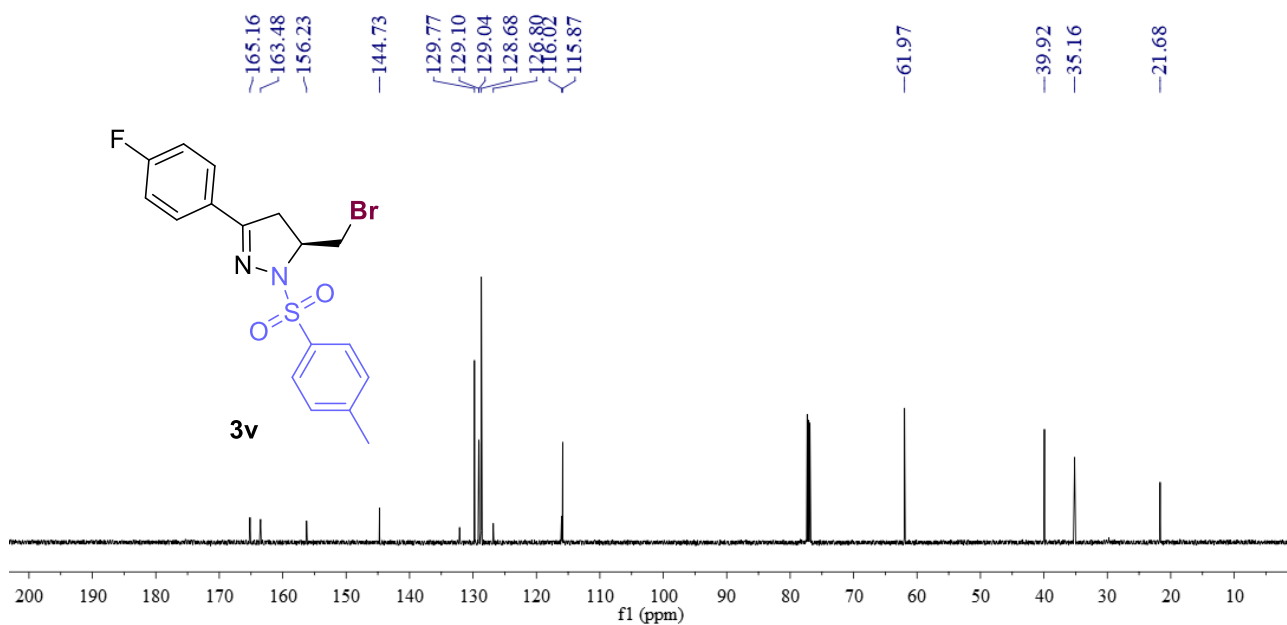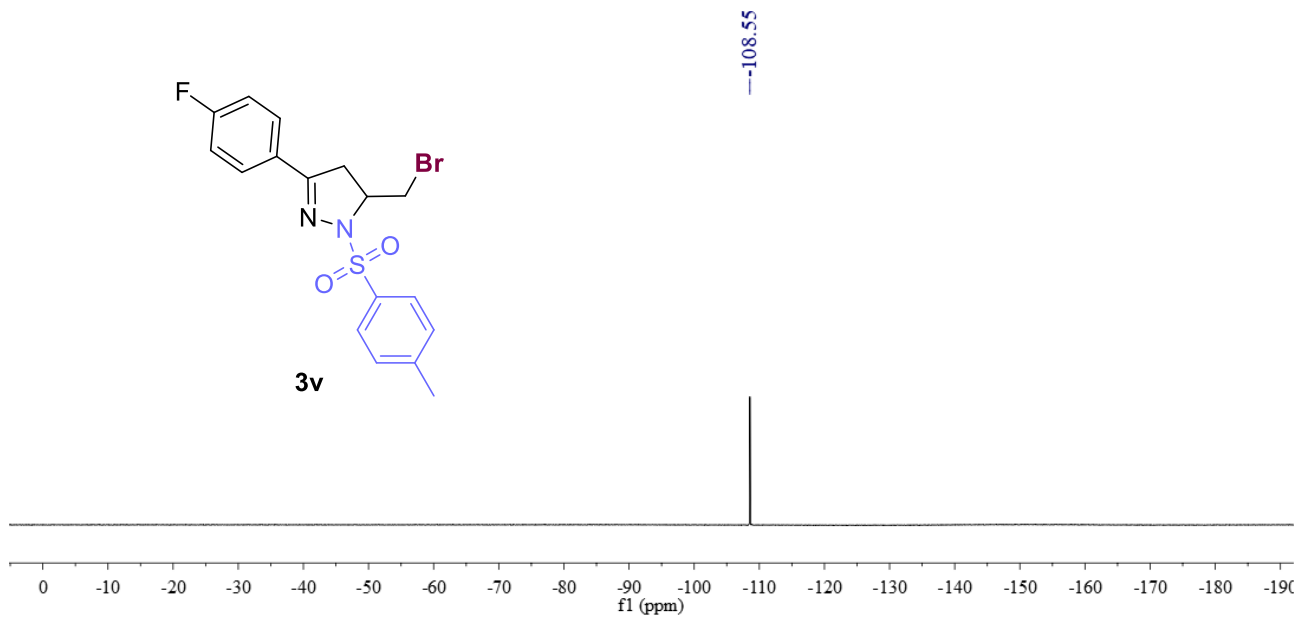

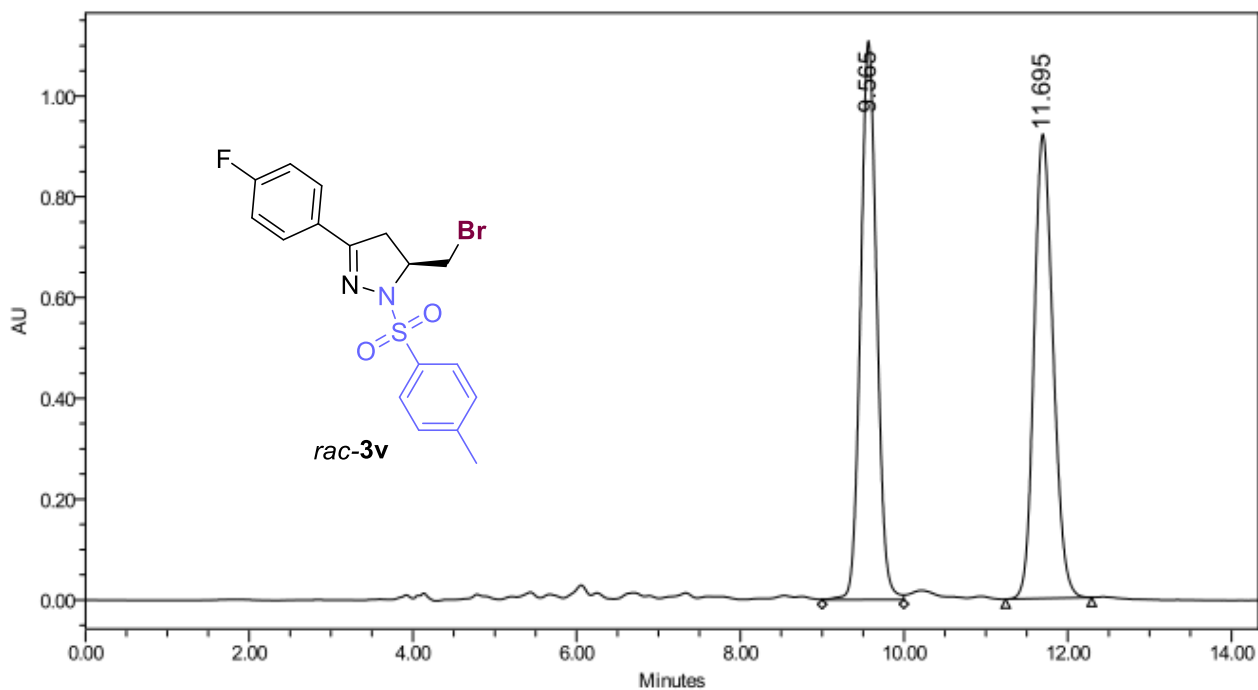

|   | RT (min) | Peak Type | Area ( $\mu\text{V}\cdot\text{sec}$ ) | % Area | Height ( $\mu\text{V}$ ) | % Height | Integration Type | Points Across Peak | Start Time (min) |
|---|----------|-----------|---------------------------------------|--------|--------------------------|----------|------------------|--------------------|------------------|
| 1 | 9.565    | Unknown   | 15185821                              | 50.44  | 1108497                  | 54.62    | VV               | 598                | 9.000            |
| 2 | 11.695   | Unknown   | 14923500                              | 49.56  | 920857                   | 45.38    | BB               | 631                | 11.242           |

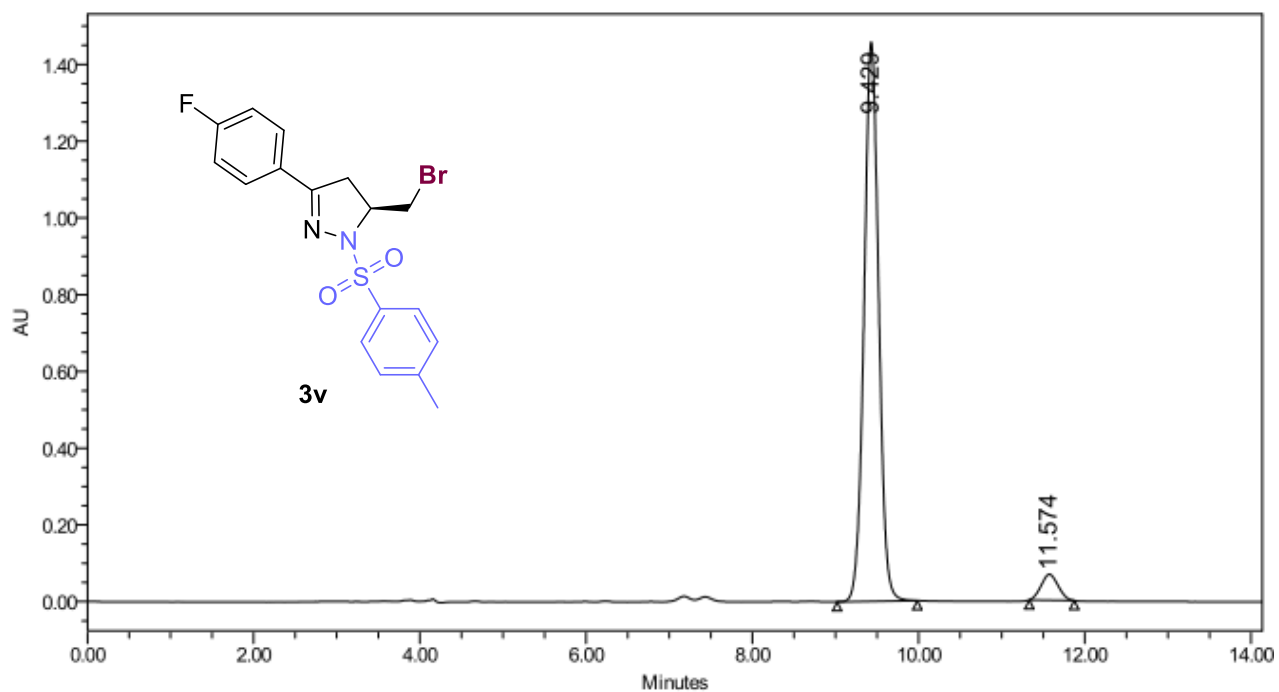

|   | RT (min) | Peak Type | Area ( $\mu\text{V}\cdot\text{sec}$ ) | % Area | Height ( $\mu\text{V}$ ) | % Height | Integration Type | Points Across Peak | Start Time (min) |
|---|----------|-----------|---------------------------------------|--------|--------------------------|----------|------------------|--------------------|------------------|
| 1 | 9.429    | Unknown   | 17768472                              | 94.88  | 1457285                  | 95.57    | Bb               | 579                | 9.020            |
| 2 | 11.574   | Unknown   | 958708                                | 5.12   | 67612                    | 4.43     | bb               | 323                | 11.333           |

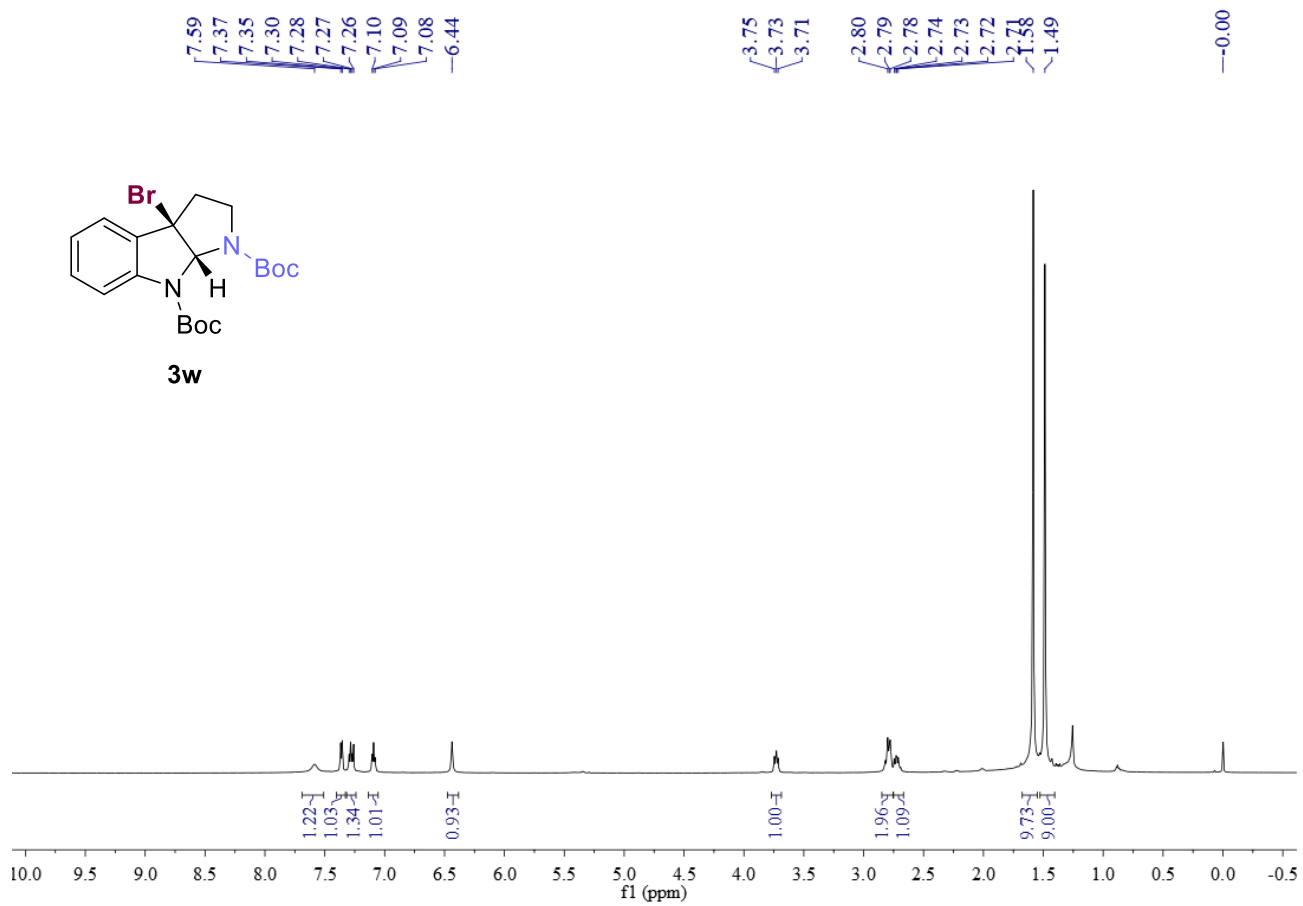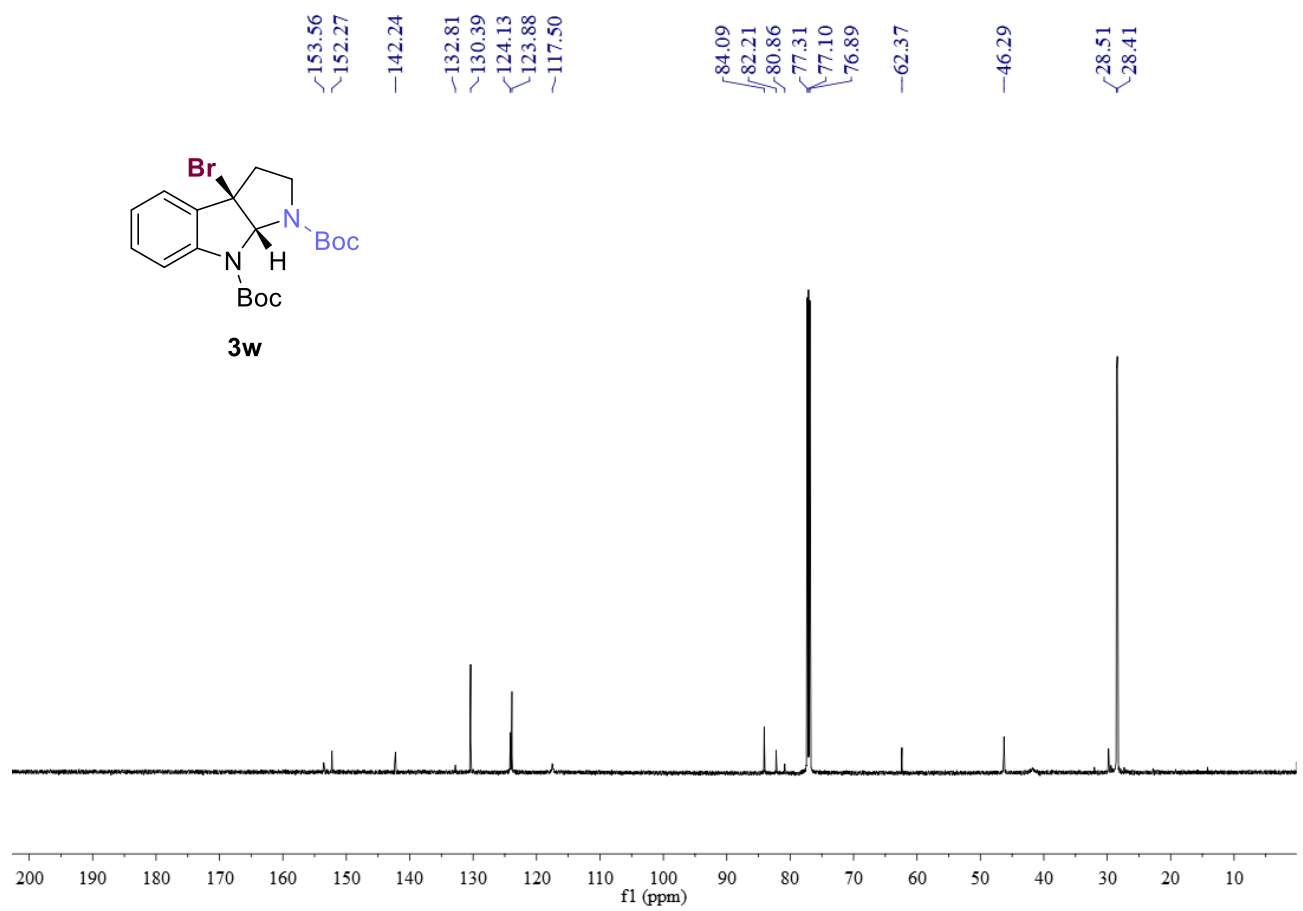

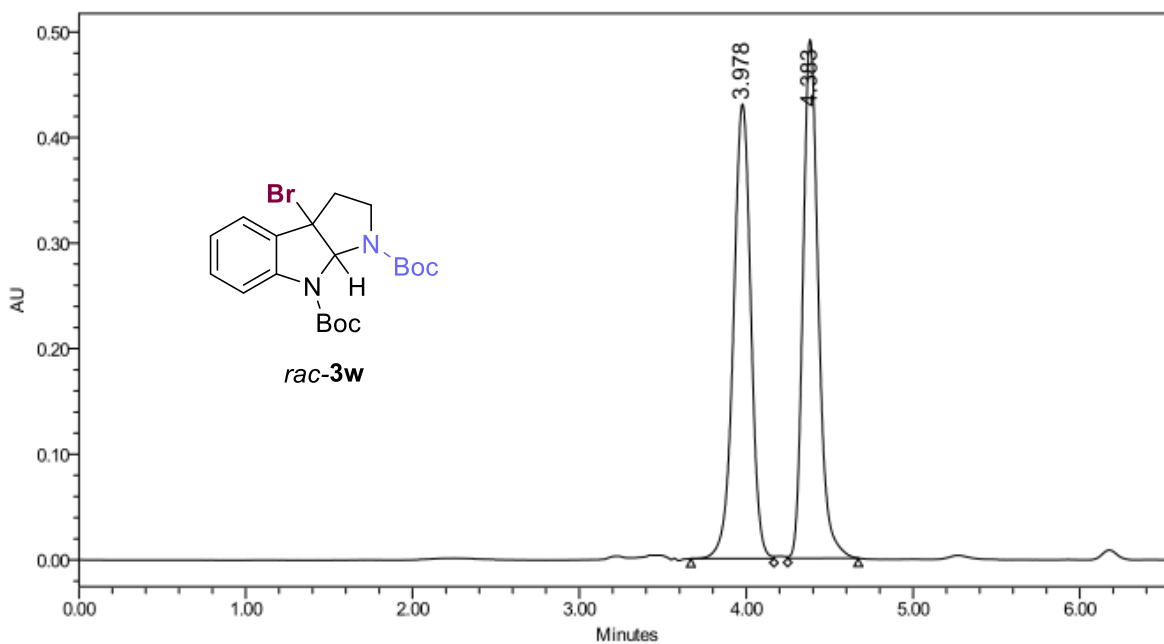

|   | RT (min) | Peak Type | Area ( $\mu\text{V}\cdot\text{sec}$ ) | % Area | Height ( $\mu\text{V}$ ) | % Height | Integration Type | Points Across Peak | Start Time (min) | End Time (min) |
|---|----------|-----------|---------------------------------------|--------|--------------------------|----------|------------------|--------------------|------------------|----------------|
| 1 | 3.978    | Unknown   | 3114367                               | 49.91  | 430486                   | 46.70    | bV               | 299                | 3.668            | 4.167          |
| 2 | 4.383    | Unknown   | 3125923                               | 50.09  | 491379                   | 53.30    | Vb               | 254                | 4.248            | 4.672          |

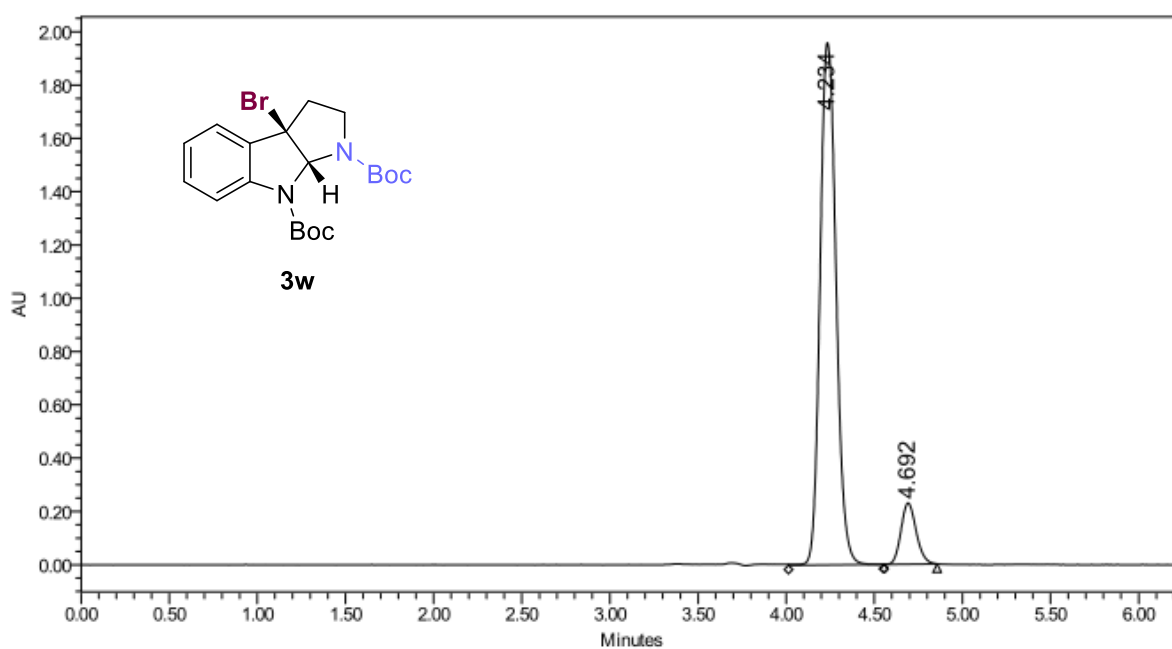

|   | RT (min) | Peak Type | Area ( $\mu\text{V}\cdot\text{sec}$ ) | % Area | Height ( $\mu\text{V}$ ) | % Height | Integration Type | Points Across Peak | Start Time (min) | End Time (min) |
|---|----------|-----------|---------------------------------------|--------|--------------------------|----------|------------------|--------------------|------------------|----------------|
| 1 | 4.234    | Unknown   | 12329235                              | 89.95  | 1958707                  | 89.50    | VV               | 325                | 4.013            | 4.555          |
| 2 | 4.692    | Unknown   | 1376851                               | 10.05  | 229757                   | 10.50    | Vb               | 181                | 4.555            | 4.857          |

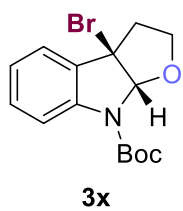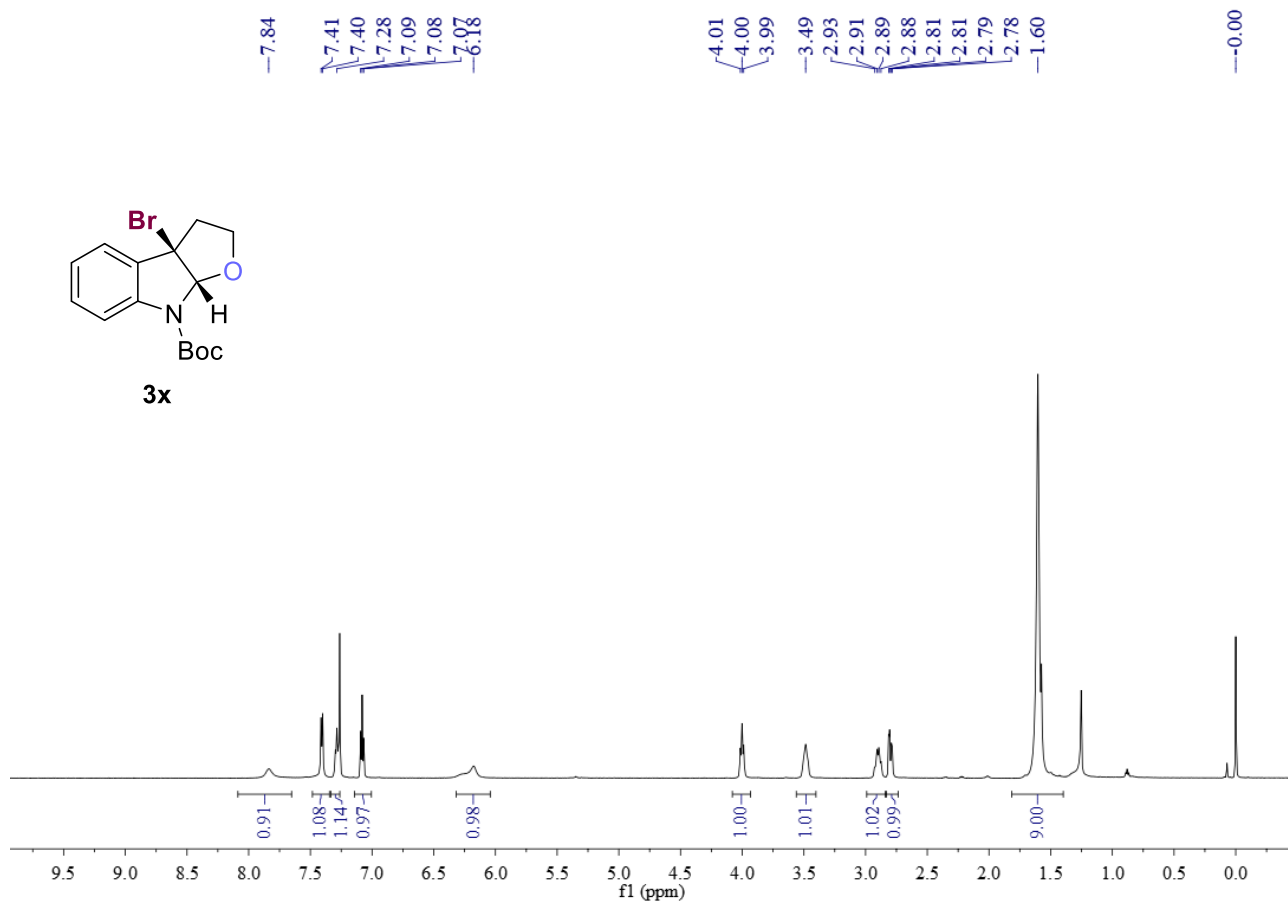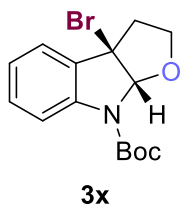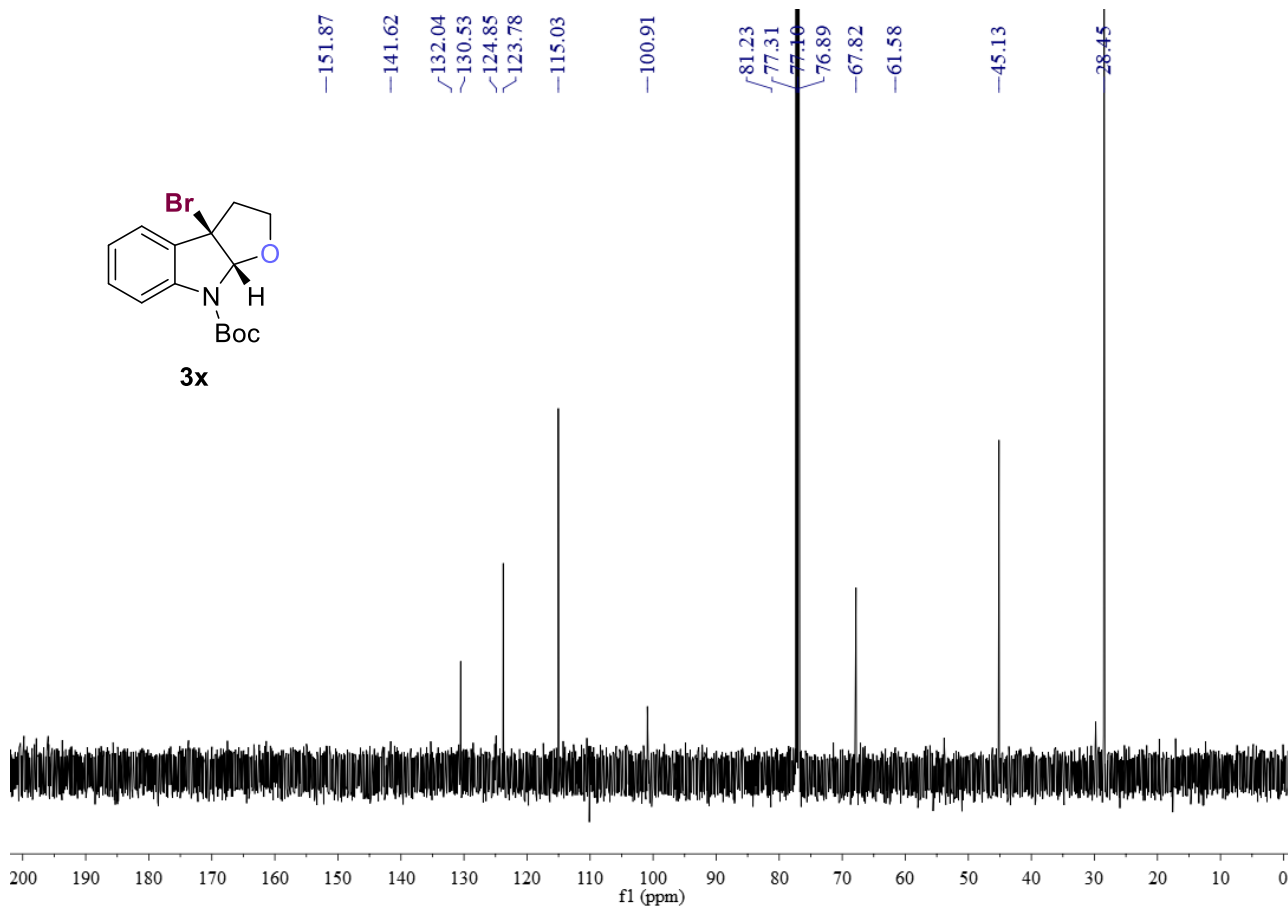

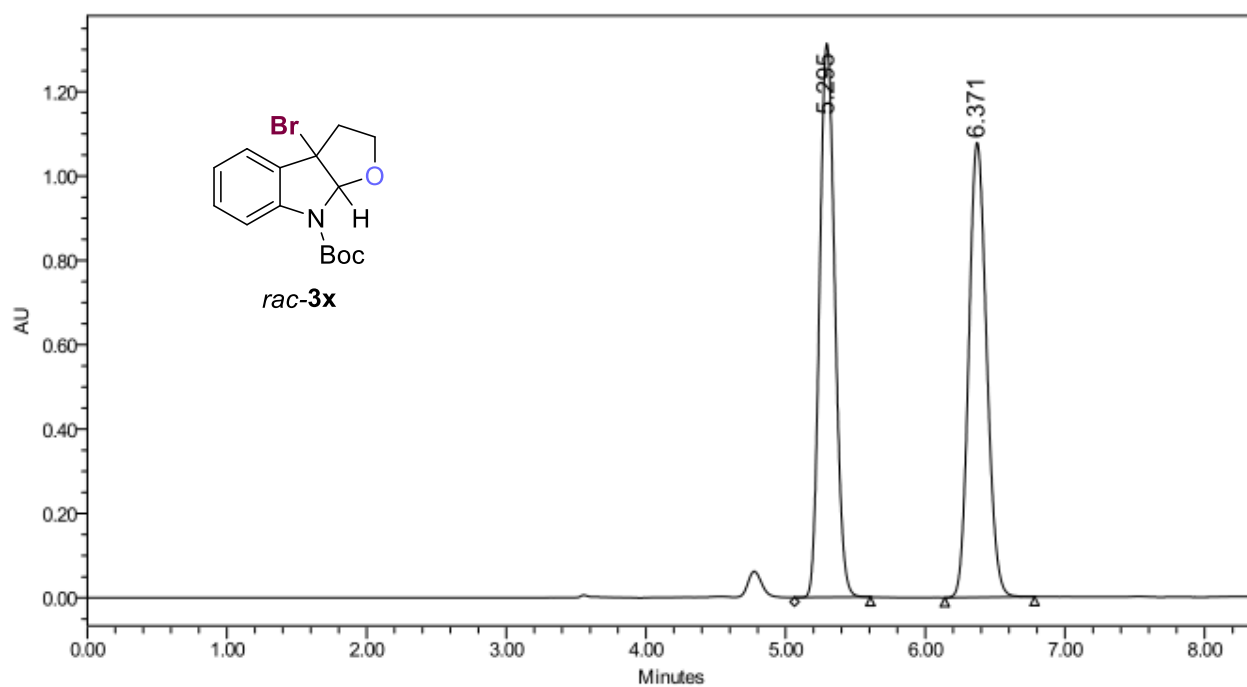

|   | RT (min) | Peak Type | Area ( $\mu\text{V}\cdot\text{sec}$ ) | % Area | Height ( $\mu\text{V}$ ) | % Height | Integration Type | Points Across Peak | Start Time (min) | End Time (min) |
|---|----------|-----------|---------------------------------------|--------|--------------------------|----------|------------------|--------------------|------------------|----------------|
| 1 | 5.295    | Unknown   | 9939263                               | 50.94  | 1312917                  | 54.90    | Vb               | 326                | 5.063            | 5.607          |
| 2 | 6.371    | Unknown   | 9574075                               | 49.06  | 1078510                  | 45.10    | BB               | 385                | 6.140            | 6.782          |

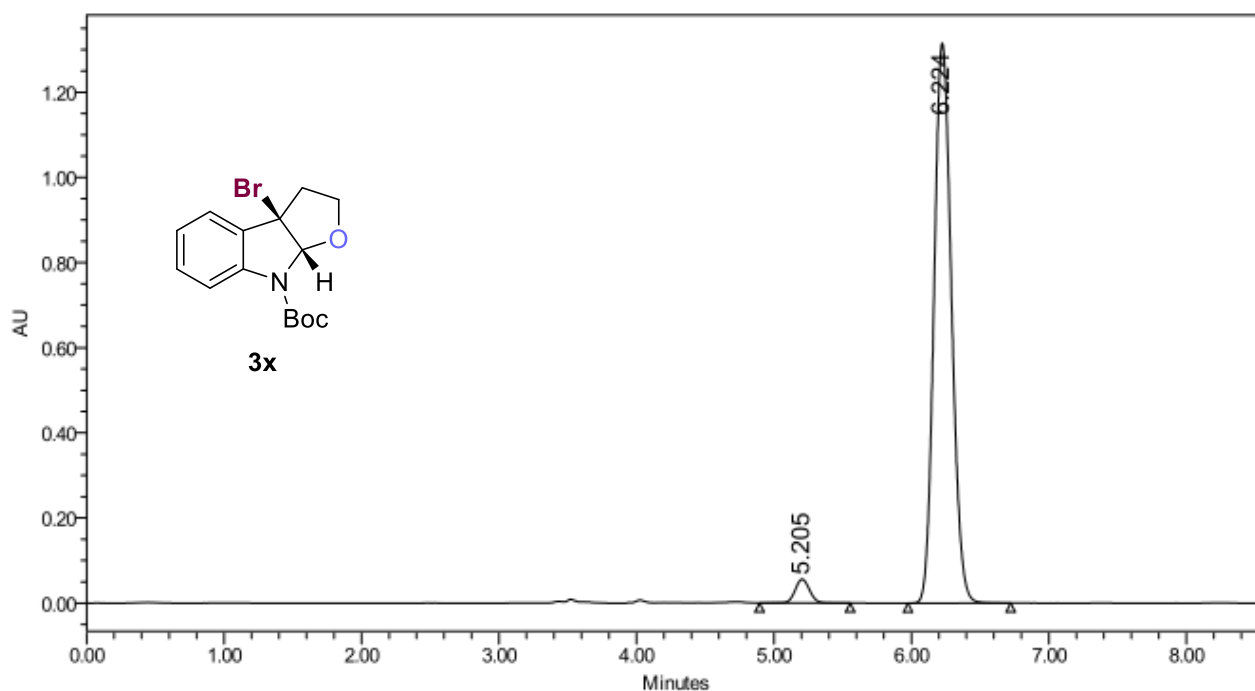

|   | RT (min) | Peak Type | Area ( $\mu\text{V}\cdot\text{sec}$ ) | % Area | Height ( $\mu\text{V}$ ) | % Height | Integration Type | Points Across Peak | Start Time (min) | End Time (min) |
|---|----------|-----------|---------------------------------------|--------|--------------------------|----------|------------------|--------------------|------------------|----------------|
| 1 | 5.205    | Unknown   | 411805                                | 3.43   | 55880                    | 4.07     | BB               | 396                | 4.895            | 5.555          |
| 2 | 6.224    | Unknown   | 11593217                              | 96.57  | 1315584                  | 95.93    | BB               | 448                | 5.975            | 6.722          |

7.78, 7.37, 7.26, 7.25, 7.24, -6.15, 4.03, 4.02, 4.00, -3.50, 2.89, 2.87, 2.86, 2.78, 2.77, 2.76, 2.75, -1.59, -0.00

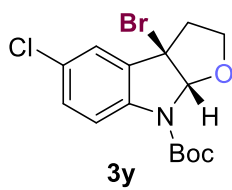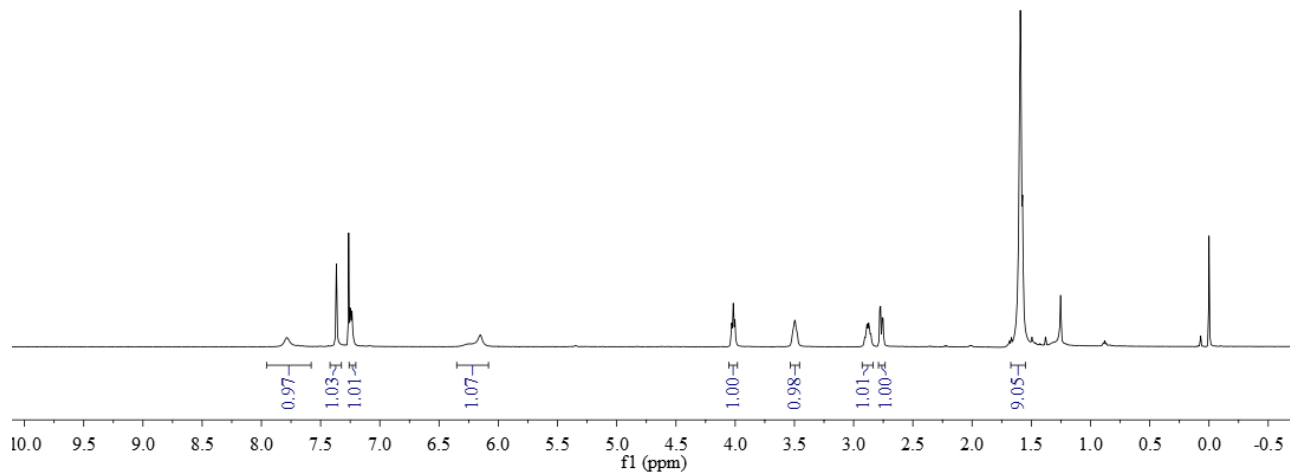

151.64, 130.56, 128.68, 124.98, 116.13, 101.20, 67.79, 60.44, 44.97, 29.78, 28.41

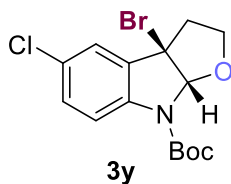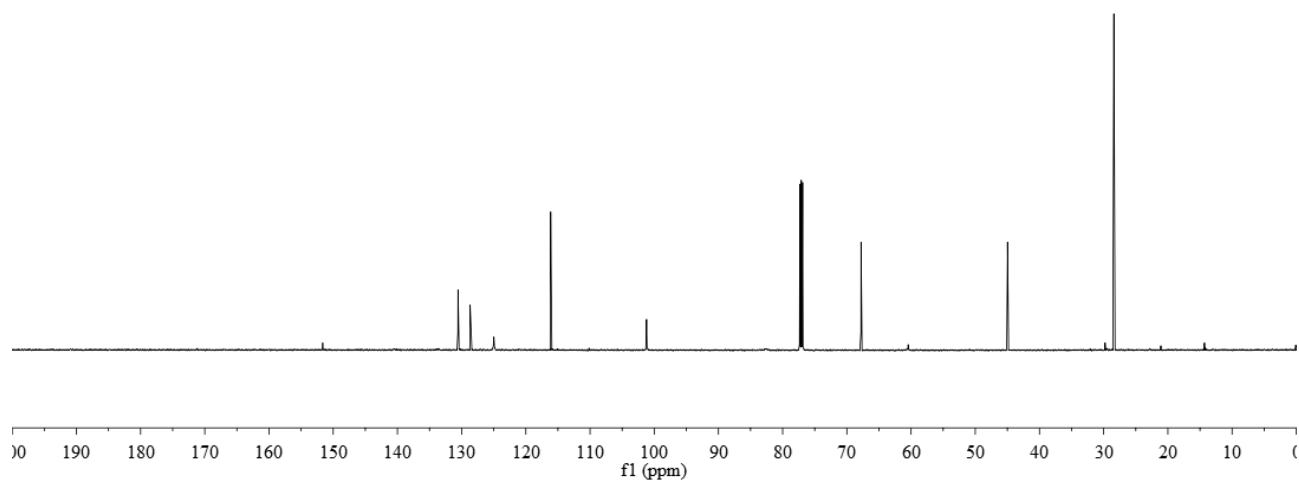



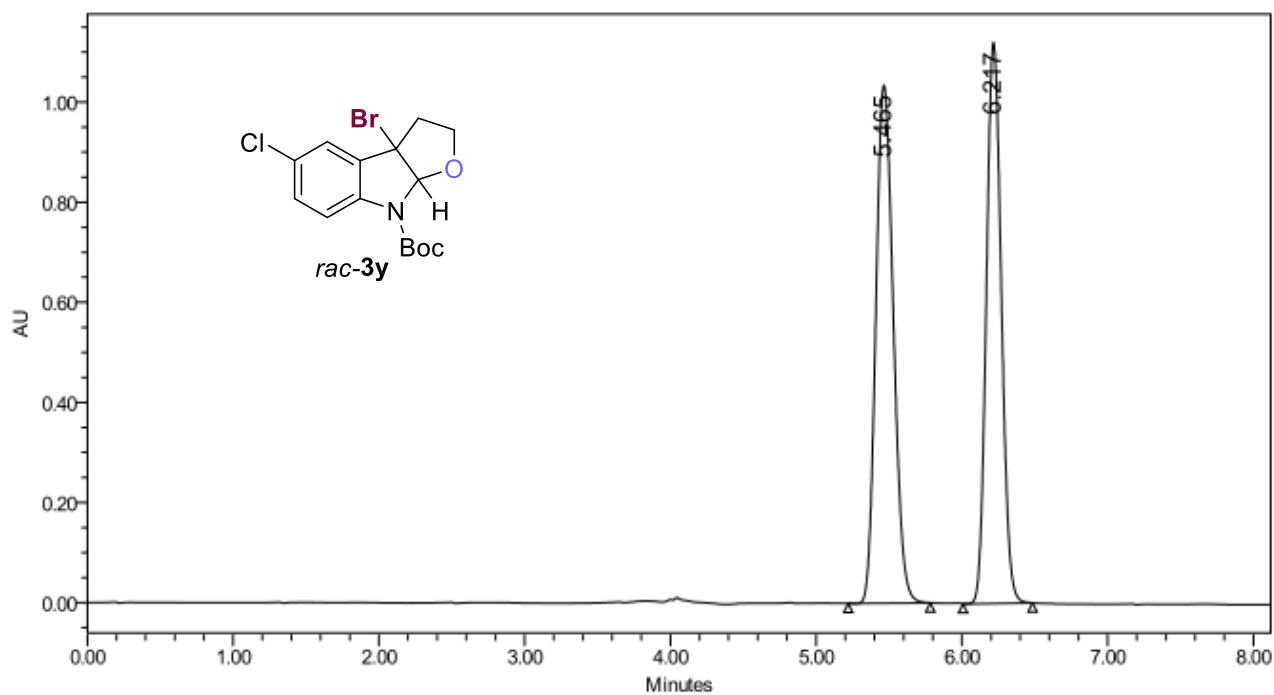

|   | RT (min) | Peak Type | Area ( $\mu\text{V}\cdot\text{sec}$ ) | % Area | Height ( $\mu\text{V}$ ) | % Height | Integration Type | Points Across Peak | Start Time (min) | End Time (min) |
|---|----------|-----------|---------------------------------------|--------|--------------------------|----------|------------------|--------------------|------------------|----------------|
| 1 | 5.465    | Unknown   | 8647626                               | 51.94  | 1034828                  | 48.00    | bb               | 338                | 5.220            | 5.783          |
| 2 | 6.217    | Unknown   | 8000157                               | 48.06  | 1121083                  | 52.00    | bb               | 286                | 6.008            | 6.485          |

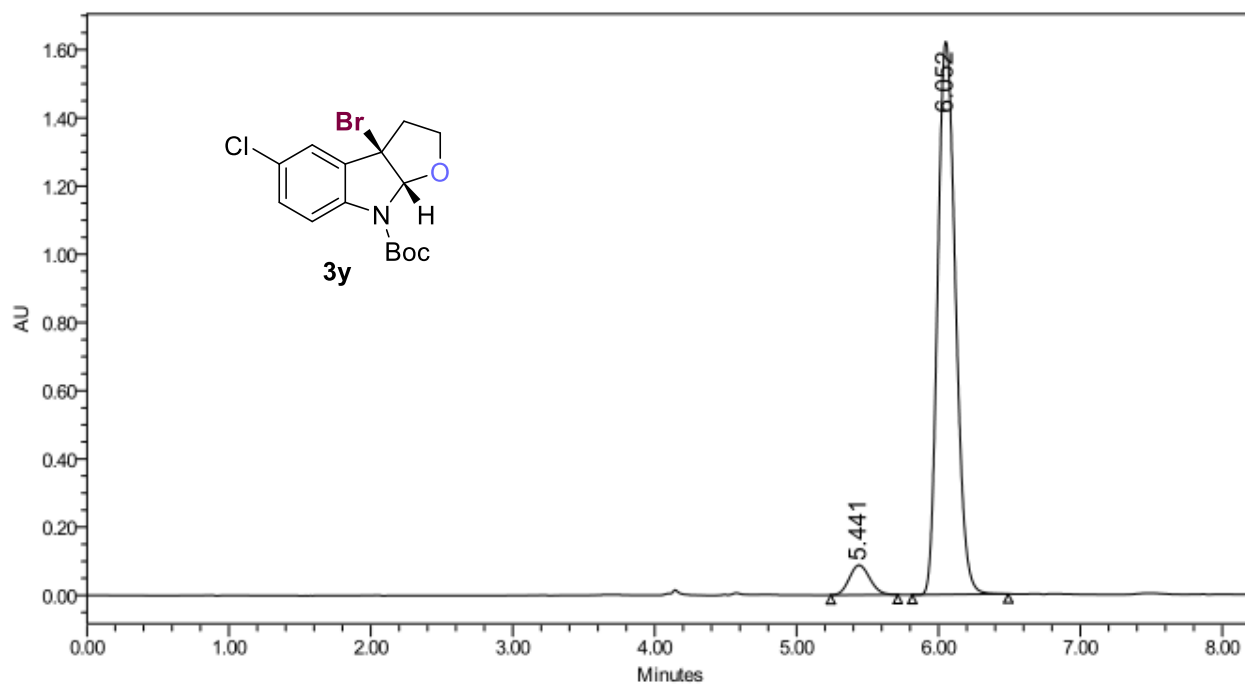

|   | RT (min) | Peak Type | Area ( $\mu\text{V}\cdot\text{sec}$ ) | % Area | Height ( $\mu\text{V}$ ) | % Height | Integration Type | Points Across Peak | Start Time (min) | End Time (min) |
|---|----------|-----------|---------------------------------------|--------|--------------------------|----------|------------------|--------------------|------------------|----------------|
| 1 | 5.441    | Unknown   | 873218                                | 5.81   | 86965                    | 5.09     | bb               | 283                | 5.242            | 5.713          |
| 2 | 6.052    | Unknown   | 14159091                              | 94.19  | 1621699                  | 94.91    | bb               | 406                | 5.815            | 6.492          |

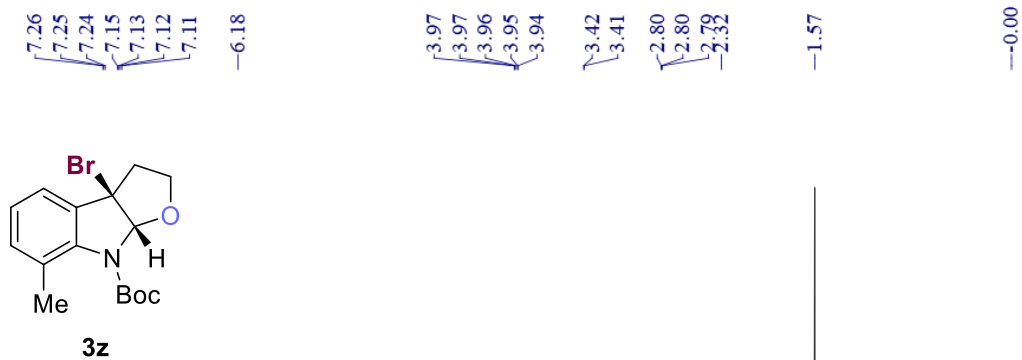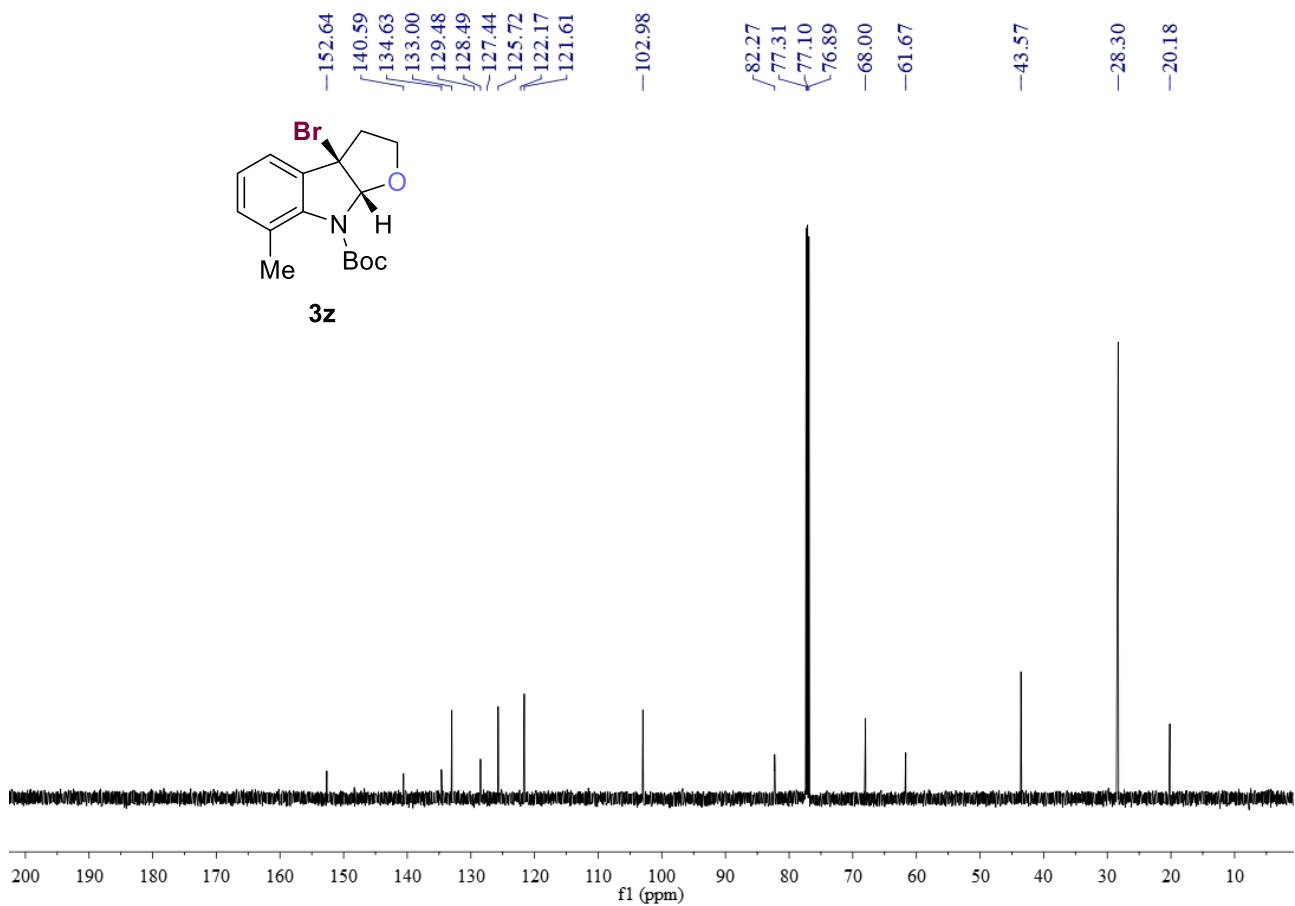

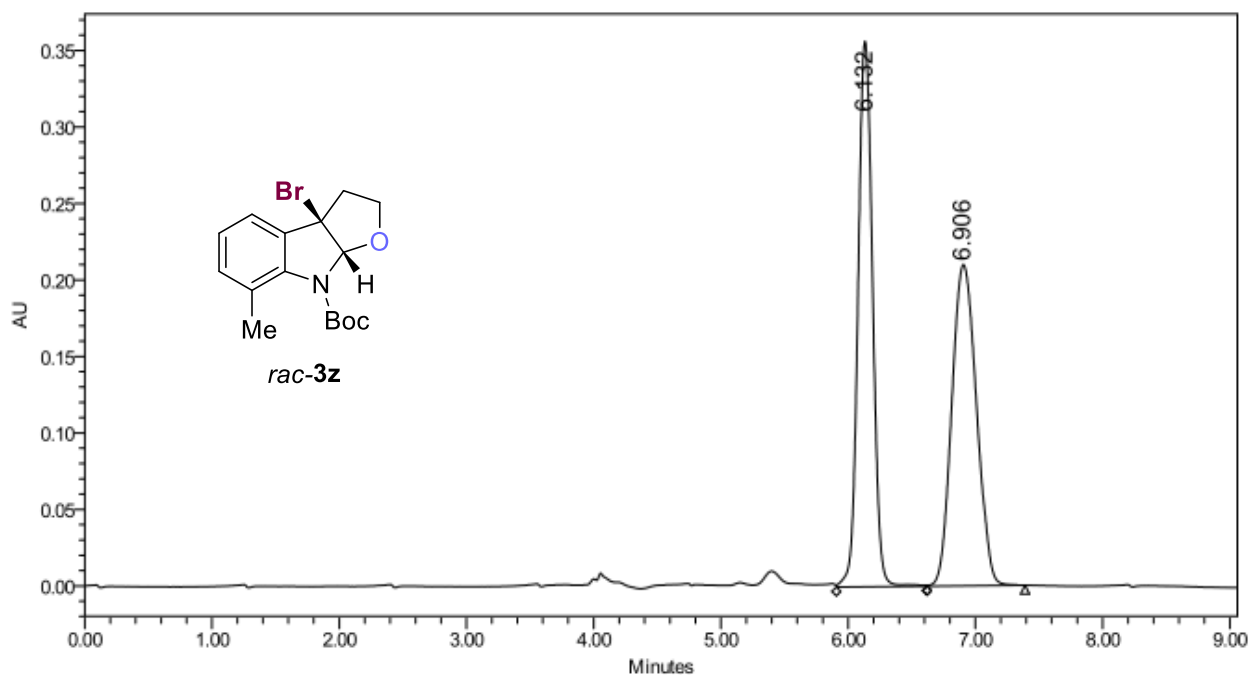

|   | RT (min) | Peak Type | Area ( $\mu\text{V}\cdot\text{sec}$ ) | % Area | Height ( $\mu\text{V}$ ) | % Height | Integration Type | Points Across Peak | Start Time (min) | End Time (min) |
|---|----------|-----------|---------------------------------------|--------|--------------------------|----------|------------------|--------------------|------------------|----------------|
| 1 | 6.132    | Unknown   | 2836301                               | 50.12  | 356496                   | 62.94    | VV               | 428                | 5.907            | 6.620          |
| 2 | 6.906    | Unknown   | 2822566                               | 49.88  | 209867                   | 37.06    | VB               | 462                | 6.620            | 7.390          |

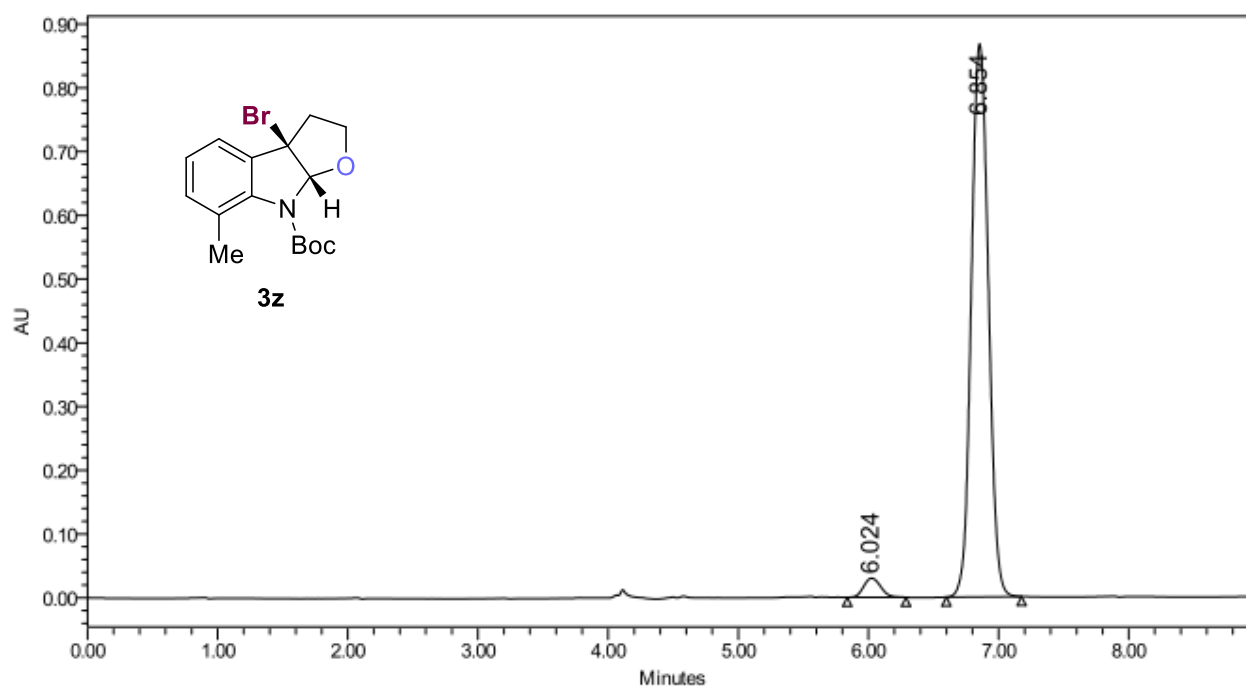

|   | RT (min) | Peak Type | Area ( $\mu\text{V}\cdot\text{sec}$ ) | % Area | Height ( $\mu\text{V}$ ) | % Height | Integration Type | Points Across Peak | Start Time (min) | End Time (min) |
|---|----------|-----------|---------------------------------------|--------|--------------------------|----------|------------------|--------------------|------------------|----------------|
| 1 | 6.024    | Unknown   | 272030                                | 3.33   | 29926                    | 3.34     | Bb               | 271                | 5.837            | 6.288          |
| 2 | 6.854    | Unknown   | 7902478                               | 96.67  | 867164                   | 96.66    | bb               | 347                | 6.598            | 7.177          |

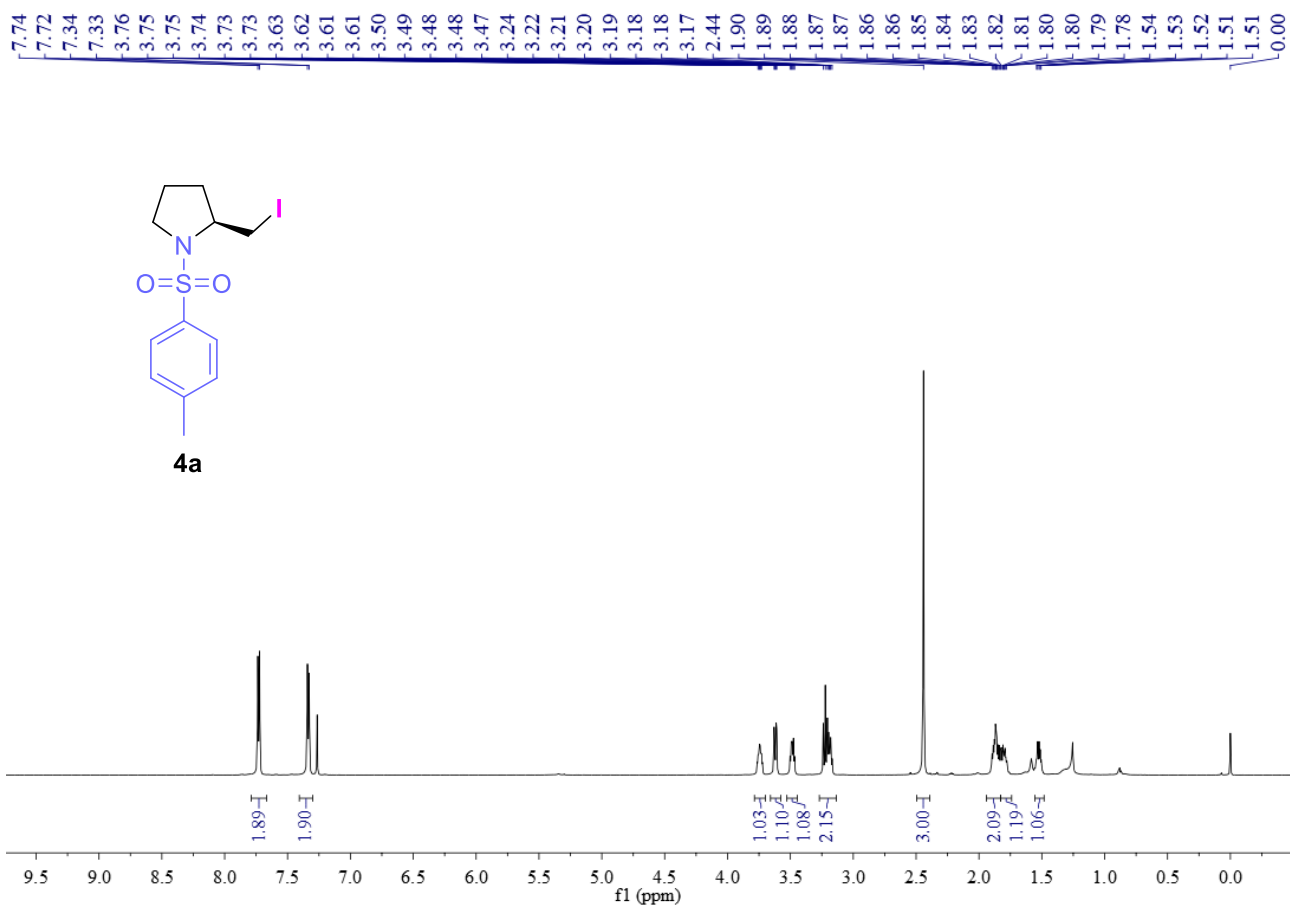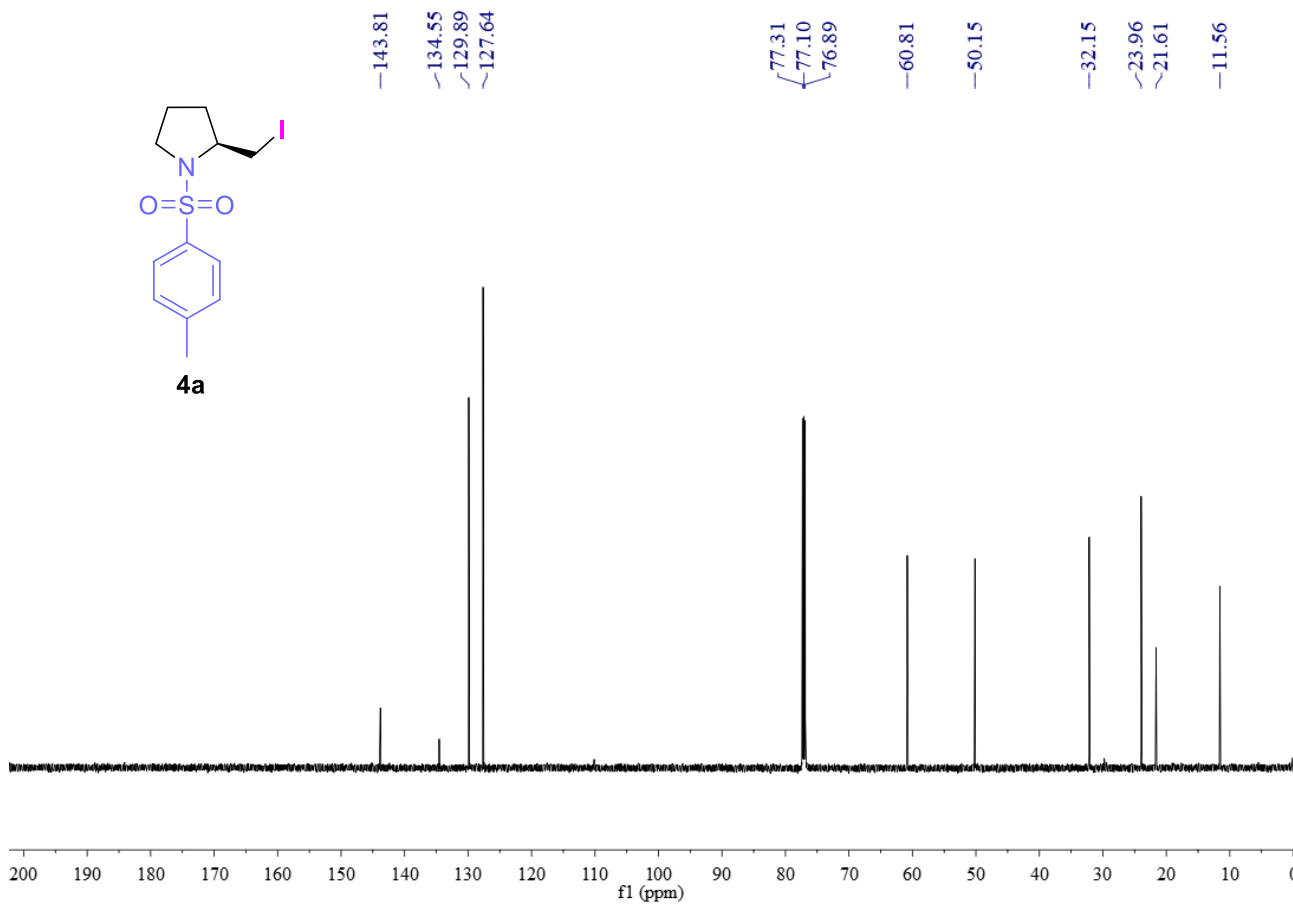

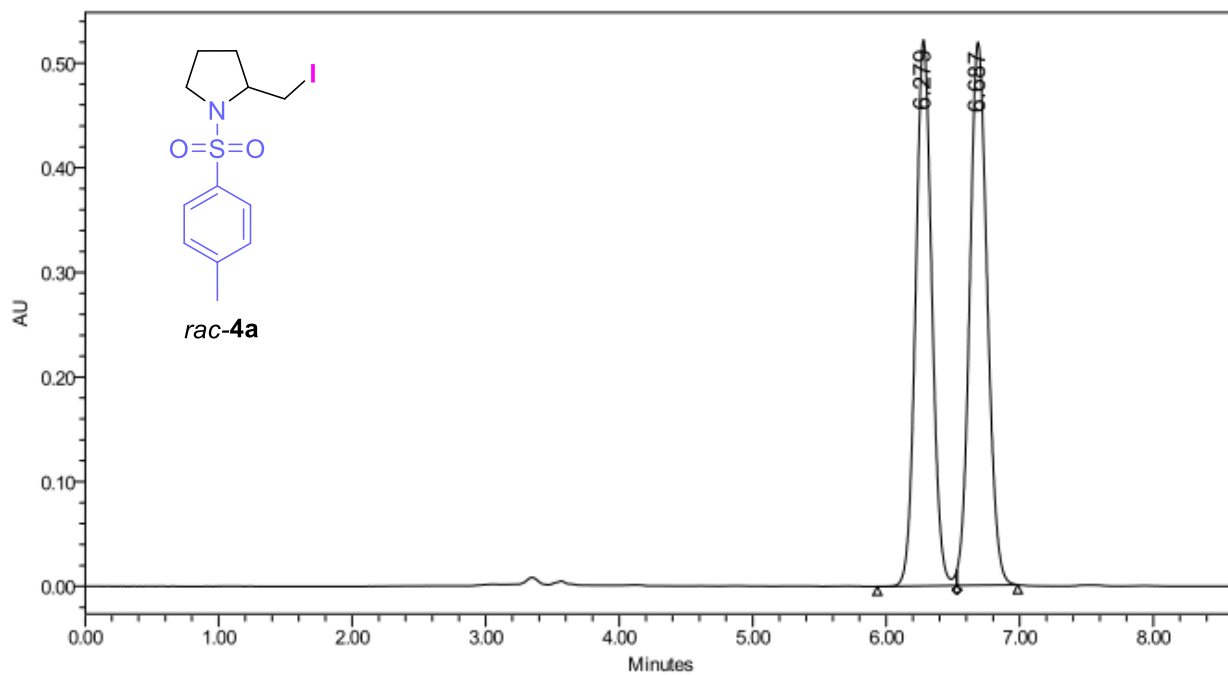

|   | RT (min) | Peak Type | Area ( $\mu\text{V}\cdot\text{sec}$ ) | % Area | Height ( $\mu\text{V}$ ) | % Height | Integration Type | Points Across Peak | Start Time (min) | End Time (min) |
|---|----------|-----------|---------------------------------------|--------|--------------------------|----------|------------------|--------------------|------------------|----------------|
| 1 | 6.279    | Unknown   | 4407613                               | 48.16  | 521893                   | 50.14    | bv               | 357                | 5.933            | 6.528          |
| 2 | 6.687    | Unknown   | 4744857                               | 51.84  | 519038                   | 49.86    | vb               | 274                | 6.528            | 6.985          |

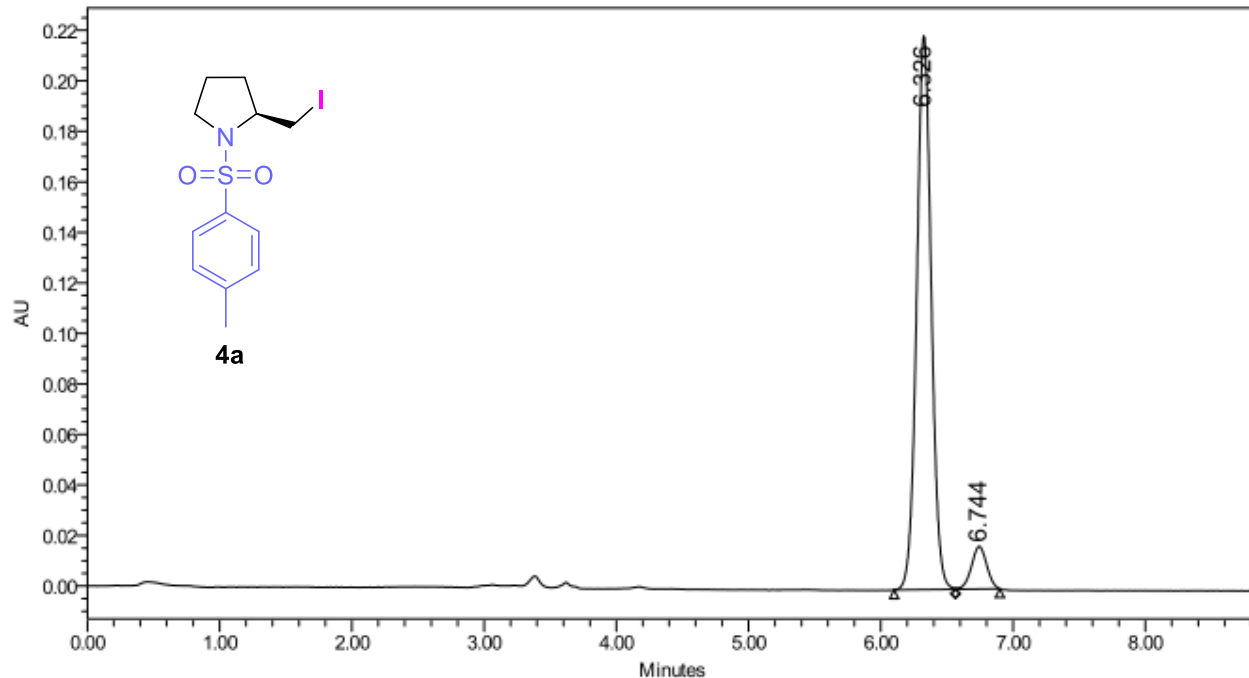

|   | RT (min) | Peak Type | Area ( $\mu\text{V}\cdot\text{sec}$ ) | % Area | Height ( $\mu\text{V}$ ) | % Height | Integration Type | Points Across Peak | Start Time (min) | End Time (min) |
|---|----------|-----------|---------------------------------------|--------|--------------------------|----------|------------------|--------------------|------------------|----------------|
| 1 | 6.326    | Unknown   | 1678334                               | 92.53  | 219338                   | 92.89    | BV               | 279                | 6.100            | 6.565          |
| 2 | 6.744    | Unknown   | 135577                                | 7.47   | 16795                    | 7.11     | Vb               | 201                | 6.565            | 6.900          |

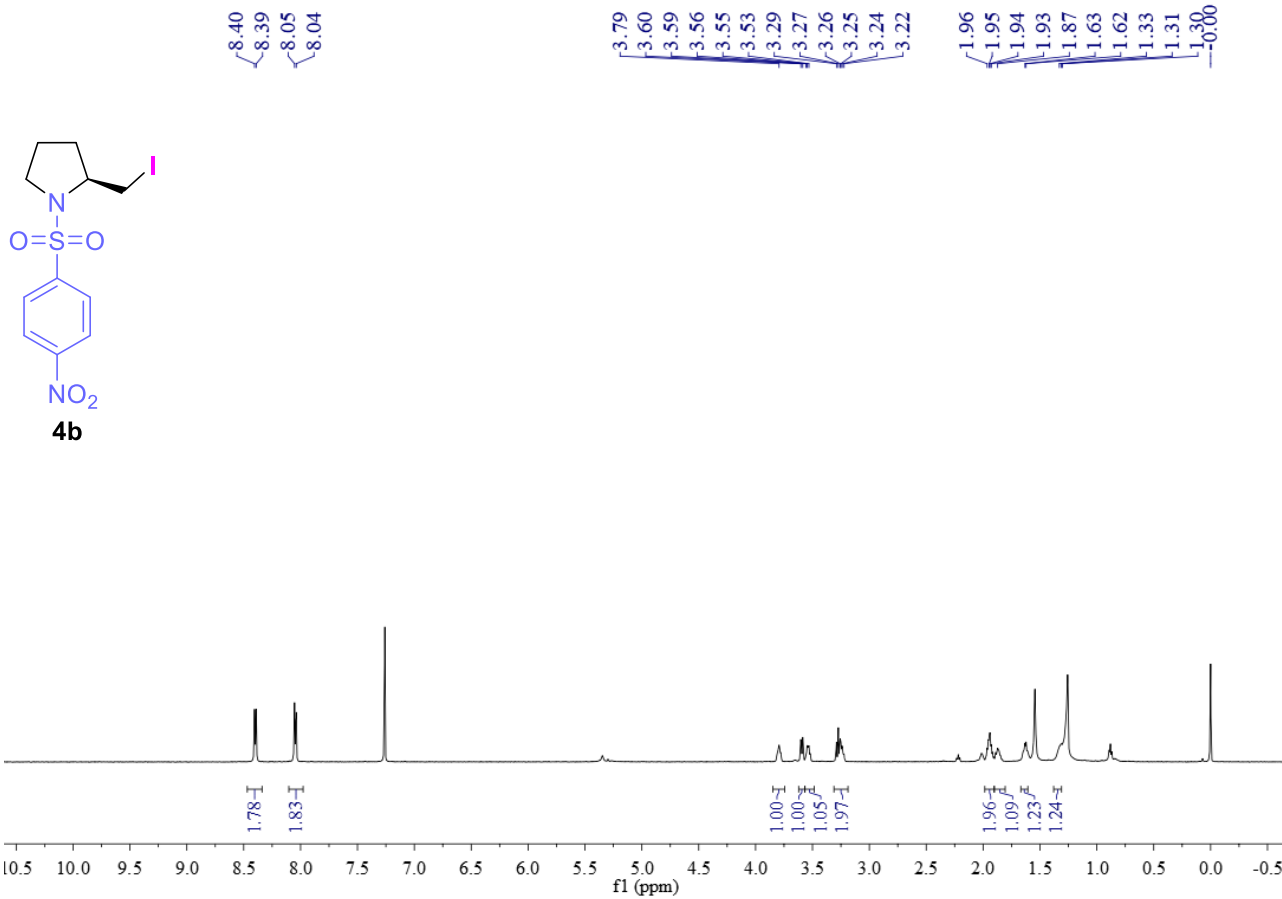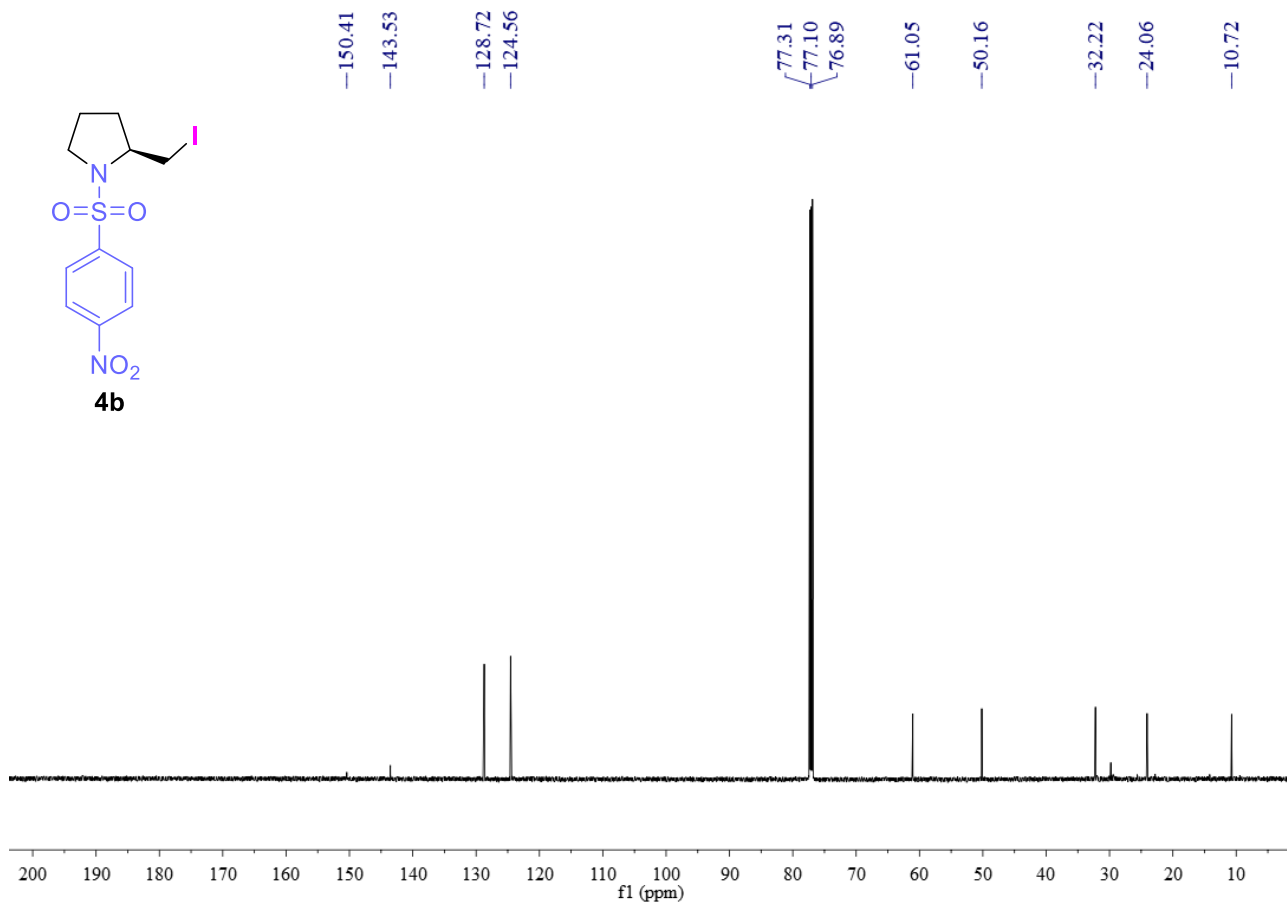

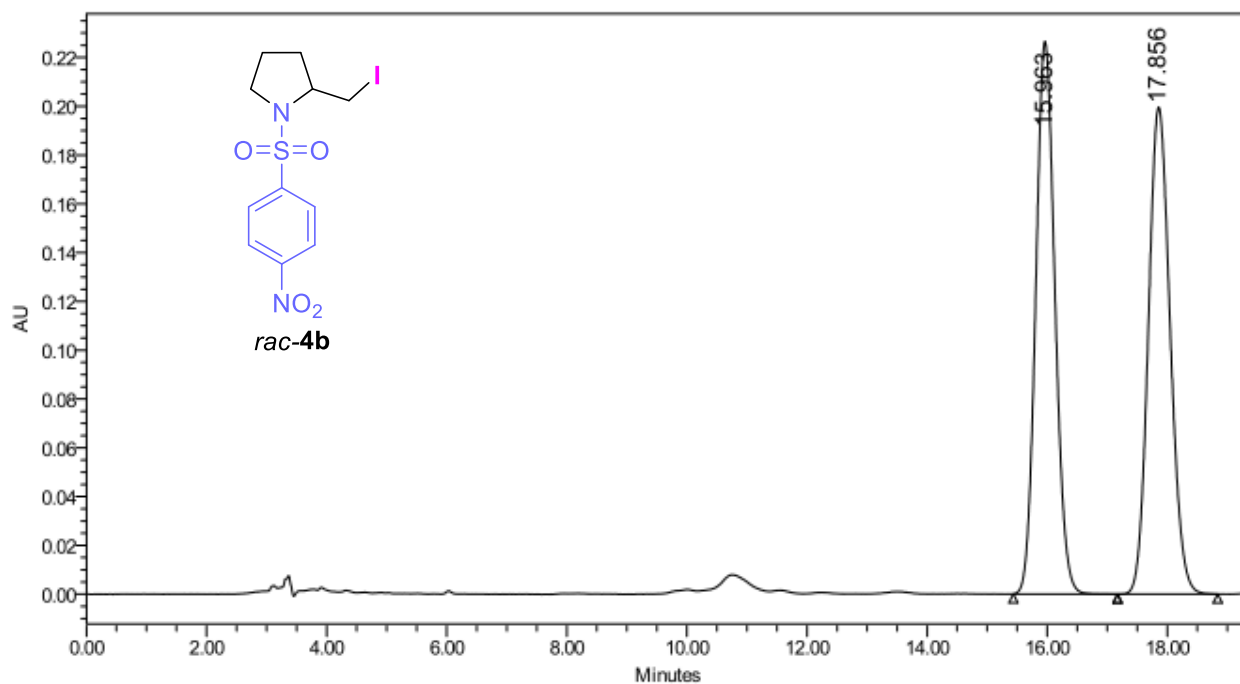

|   | RT (min) | Peak Type | Area ( $\mu\text{V}\cdot\text{sec}$ ) | % Area | Height ( $\mu\text{V}$ ) | % Height | Integration Type | Points Across Peak | Start Time (min) | End Time (min) |
|---|----------|-----------|---------------------------------------|--------|--------------------------|----------|------------------|--------------------|------------------|----------------|
| 1 | 15.963   | Unknown   | 5031406                               | 49.98  | 226477                   | 53.15    | BB               | 1040               | 15.437           | 17.170         |
| 2 | 17.856   | Unknown   | 5035463                               | 50.02  | 199623                   | 46.85    | BB               | 1001               | 17.170           | 18.838         |

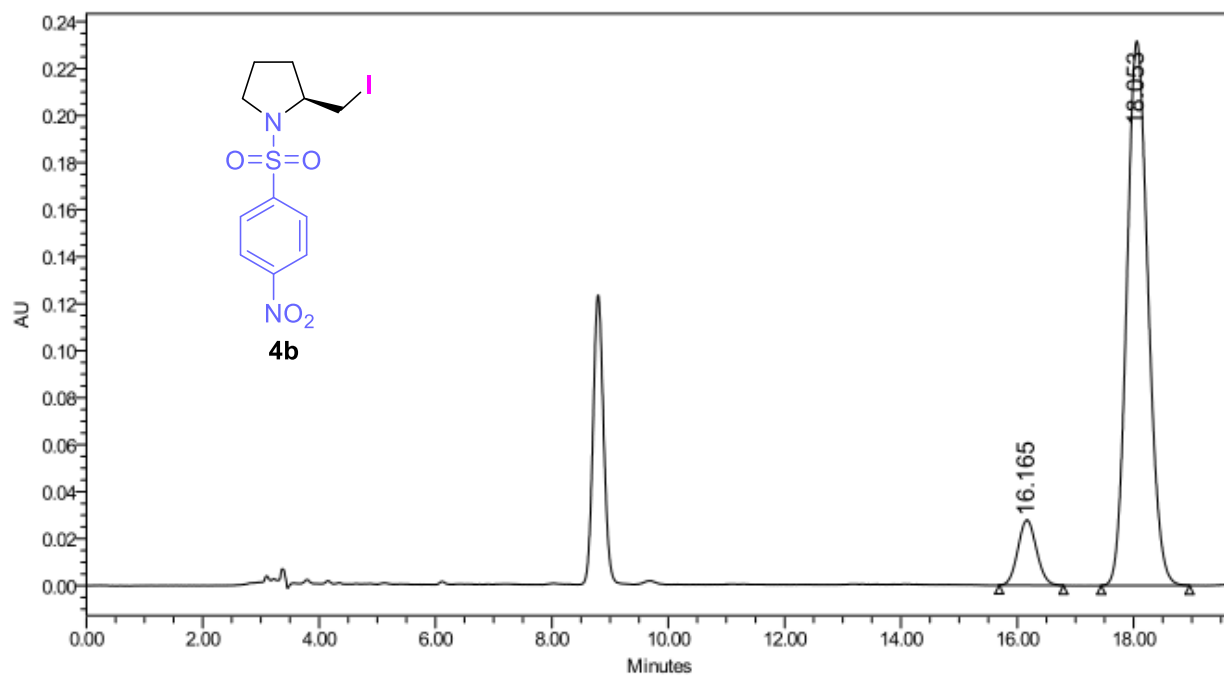

|   | RT (min) | Peak Type | Area ( $\mu\text{V}\cdot\text{sec}$ ) | % Area | Height ( $\mu\text{V}$ ) | % Height | Integration Type | Points Across Peak | Start Time (min) | End Time (min) |
|---|----------|-----------|---------------------------------------|--------|--------------------------|----------|------------------|--------------------|------------------|----------------|
| 1 | 16.165   | Unknown   | 617925                                | 9.52   | 27772                    | 10.70    | BB               | 664                | 15.687           | 16.793         |
| 2 | 18.053   | Unknown   | 5873340                               | 90.48  | 231674                   | 89.30    | BB               | 909                | 17.443           | 18.958         |

8.68  
8.48  
8.48  
8.47  
8.47  
8.20  
8.20  
8.19  
8.18  
7.81  
7.79  
7.78  
3.82  
3.81  
3.79  
3.60  
3.59  
3.58  
3.58  
3.57  
3.56  
3.55  
3.54  
3.54  
3.53  
3.53  
3.32  
3.31  
3.29  
3.27  
3.27  
3.26  
1.98  
1.96  
1.96  
1.96  
1.95  
1.95  
1.95  
1.93  
1.92  
1.91  
1.89  
1.88  
1.65  
1.64  
1.63  
1.62  
1.61  
0.00

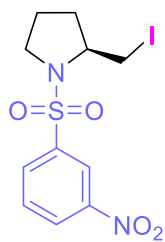

4c

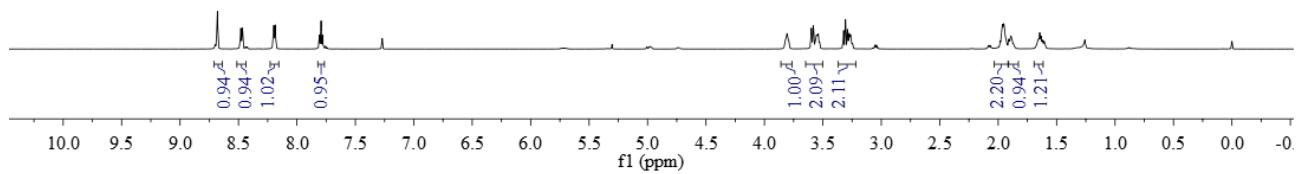

148.56  
140.11  
132.90  
130.71  
127.39  
122.55  
77.31  
77.10  
76.89  
60.94  
50.18  
32.22  
24.05  
10.89

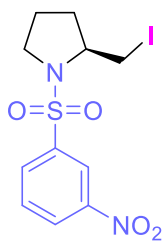

4c

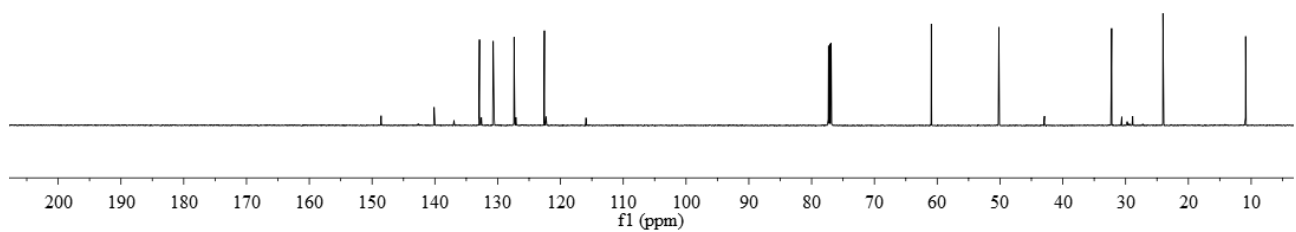



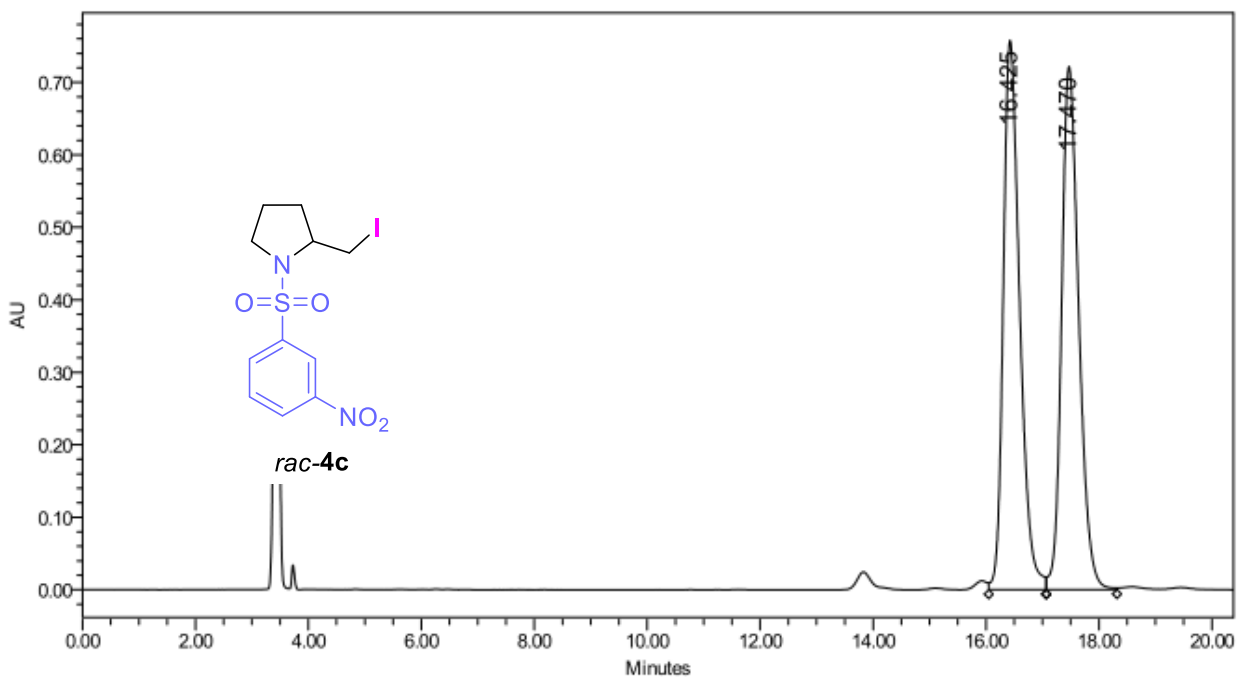

|   | RT (min) | Peak Type | Area ( $\mu\text{V}\cdot\text{sec}$ ) | % Area | Height ( $\mu\text{V}$ ) | % Height | Integration Type | Points Across Peak | Start Time (min) | End Time (min) |
|---|----------|-----------|---------------------------------------|--------|--------------------------|----------|------------------|--------------------|------------------|----------------|
| 1 | 16.425   | Unknown   | 15287232                              | 50.04  | 758039                   | 51.22    | VV               | 612                | 16.047           | 17.067         |
| 2 | 17.470   | Unknown   | 15265416                              | 49.96  | 721834                   | 48.78    | VV               | 751                | 17.067           | 18.318         |

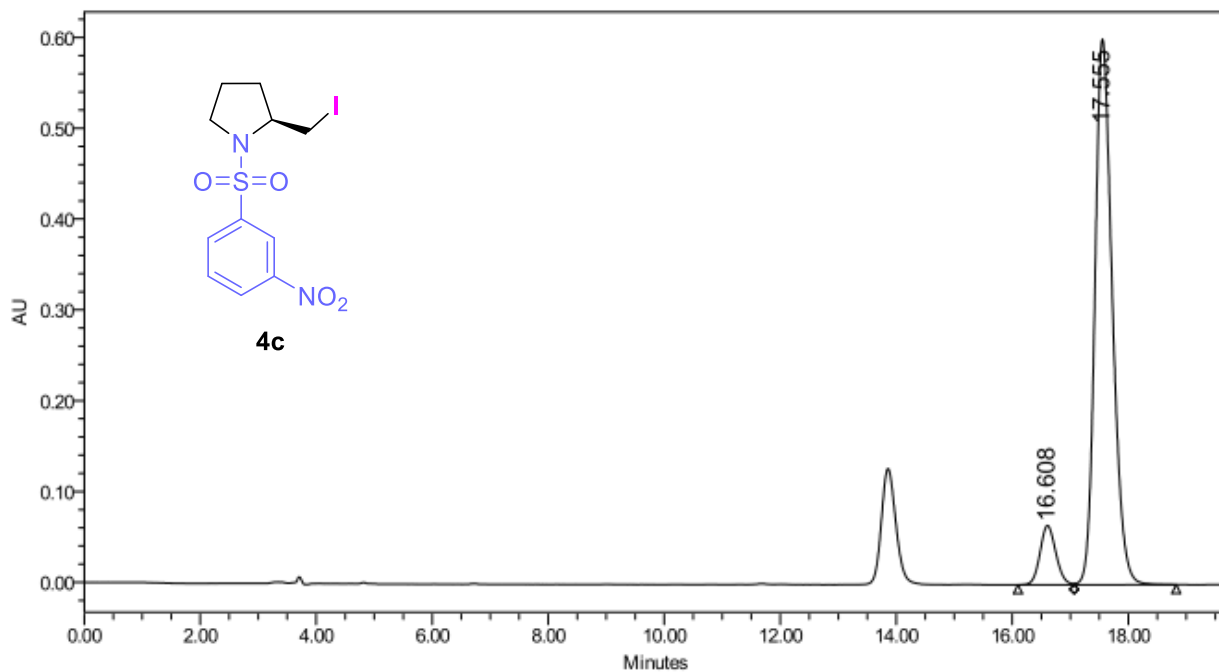

|   | RT (min) | Peak Type | Area ( $\mu\text{V}\cdot\text{sec}$ ) | % Area | Height ( $\mu\text{V}$ ) | % Height | Integration Type | Points Across Peak | Start Time (min) | End Time (min) |
|---|----------|-----------|---------------------------------------|--------|--------------------------|----------|------------------|--------------------|------------------|----------------|
| 1 | 16.608   | Unknown   | 1238630                               | 9.01   | 65414                    | 9.82     | BV               | 582                | 16.097           | 17.067         |
| 2 | 17.555   | Unknown   | 12514615                              | 90.99  | 600829                   | 90.18    | VB               | 1055               | 17.067           | 18.825         |

8.07  
8.05  
8.03  
7.73  
7.72  
7.70  
7.63  
7.61

-4.11  
3.54  
3.53  
3.52  
3.49  
3.48  
3.24  
2.09  
2.07  
2.00  
1.98  
1.82  
1.81  
1.80

-0.00

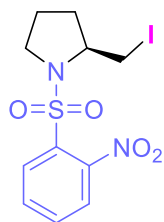

4d

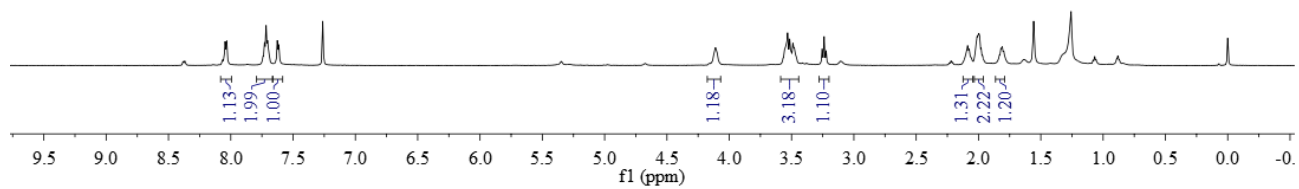

148.68  
133.87  
132.04  
131.63  
131.00  
124.21  
77.31  
77.10  
76.89  
60.84  
50.06  
32.43  
24.14  
10.49

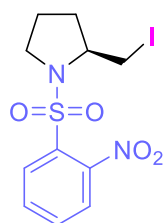

4d

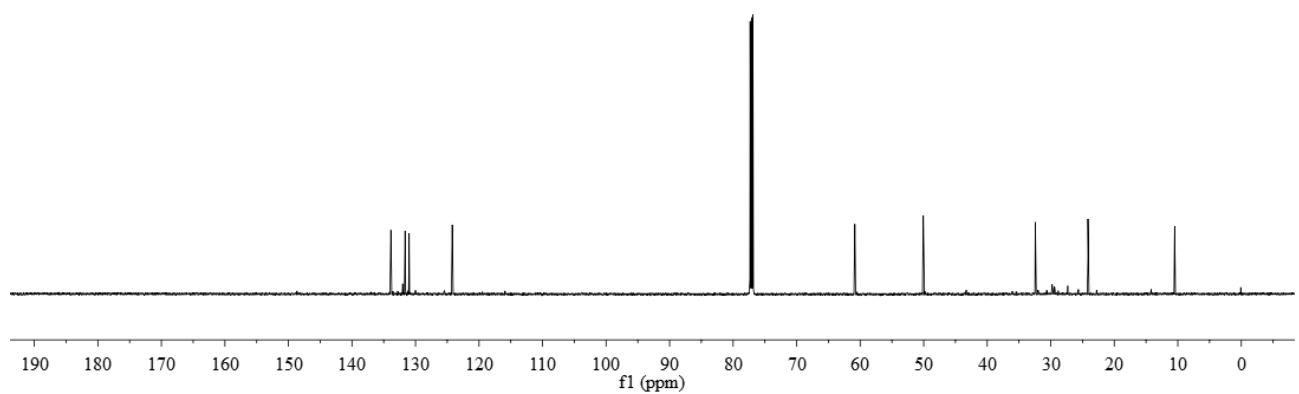

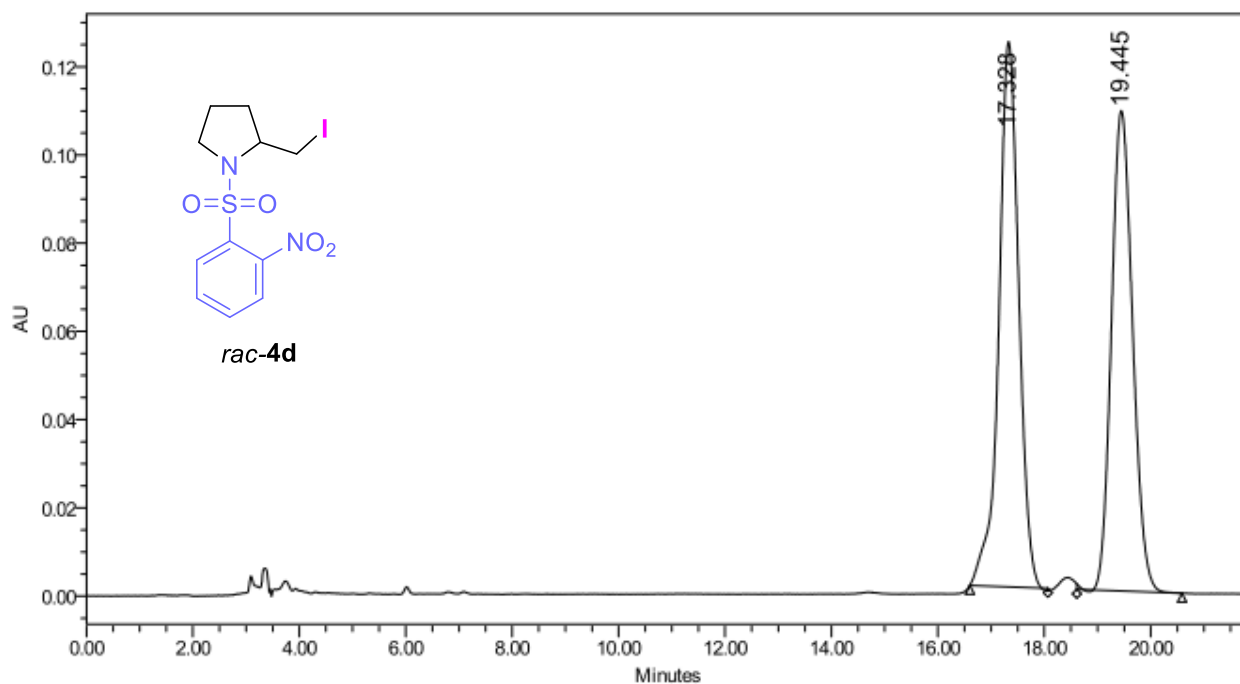

| RT (min) | Peak Type | Area ( $\mu\text{V}\cdot\text{sec}$ ) | % Area | Height ( $\mu\text{V}$ ) | % Height | Integration Type | Points Across Peak | Start Time (min) | End Time (min) |
|----------|-----------|---------------------------------------|--------|--------------------------|----------|------------------|--------------------|------------------|----------------|
| 1        | Unknown   | 3224435                               | 51.68  | 123574                   | 53.15    | bV               | 880                | 16.598           | 18.065         |
| 2        | Unknown   | 3015153                               | 48.32  | 108920                   | 46.85    | vb               | 1185               | 18.610           | 20.585         |

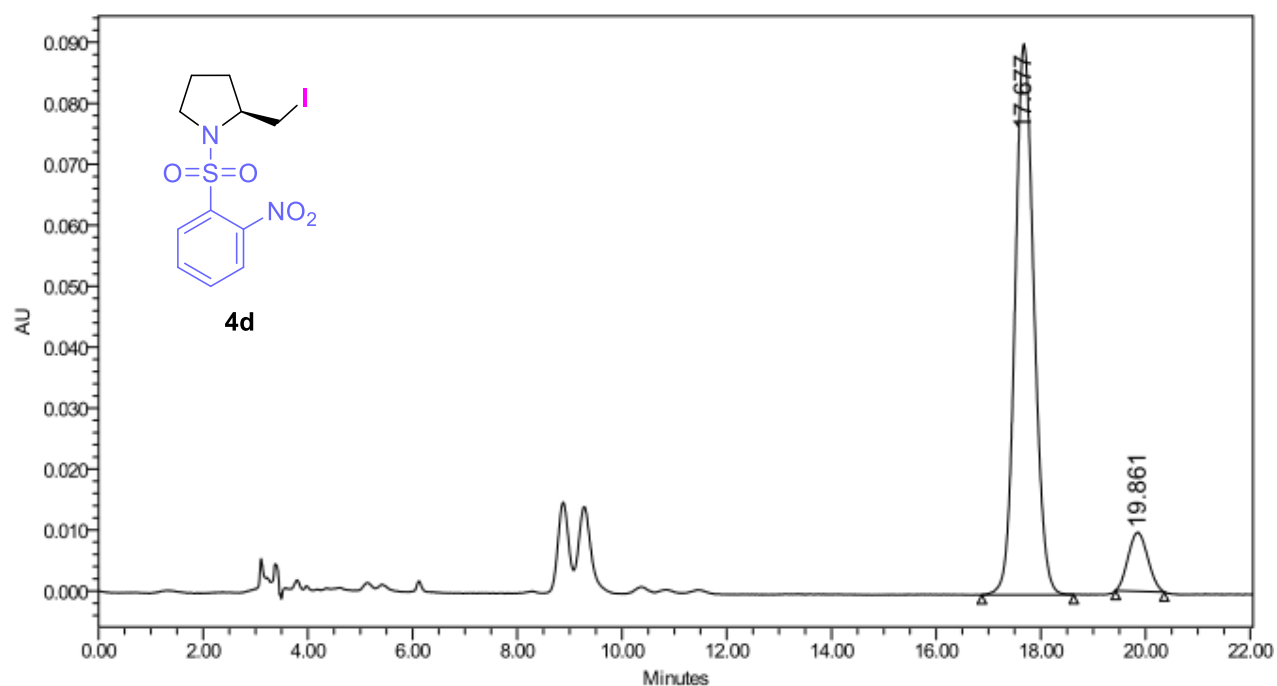

| RT (min) | Peak Type | Area ( $\mu\text{V}\cdot\text{sec}$ ) | % Area | Height ( $\mu\text{V}$ ) | % Height | Integration Type | Points Across Peak | Start Time (min) | End Time (min) |
|----------|-----------|---------------------------------------|--------|--------------------------|----------|------------------|--------------------|------------------|----------------|
| 1        | Unknown   | 2264749                               | 90.02  | 90367                    | 90.34    | BB               | 1052               | 16.875           | 18.628         |
| 2        | Unknown   | 251177                                | 9.98   | 9662                     | 9.66     | bb               | 556                | 19.430           | 20.357         |

7.86  
7.85  
7.62  
7.61  
7.57  
7.55  
7.54  
7.27

3.78  
3.77  
3.77  
3.63  
3.63  
3.61  
3.52  
3.51  
3.50  
3.49  
3.25  
3.24  
3.22  
3.22  
3.21  
3.20  
3.20

1.90  
1.89  
1.88  
1.86  
1.85  
1.81  
1.81  
1.80  
1.80  
1.54  
1.53  
0.00

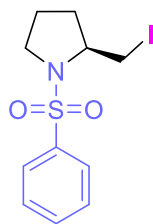

4e

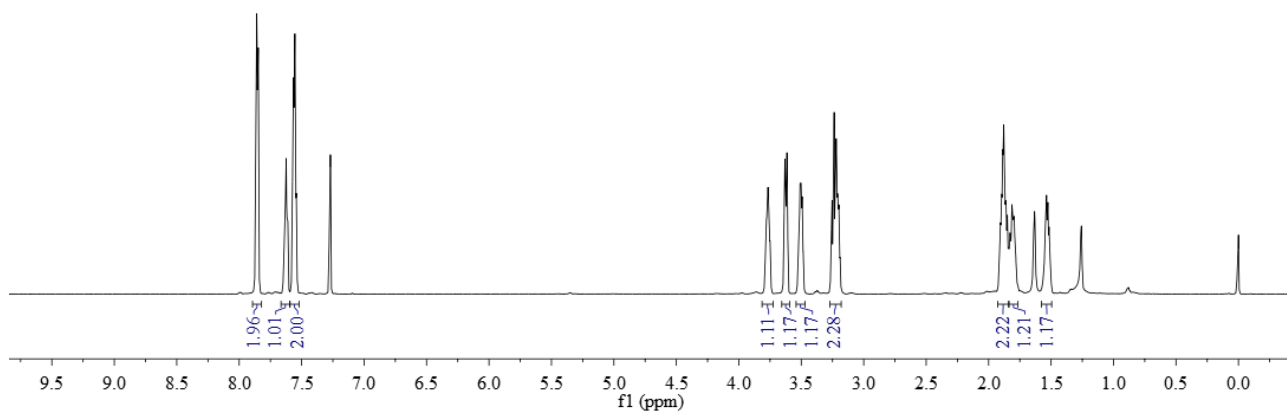

137.48  
132.97  
129.27  
127.54

77.31  
77.10  
76.89

60.82

50.12

32.13

23.95

11.44

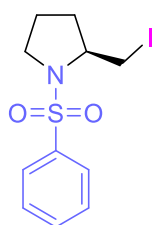

4e

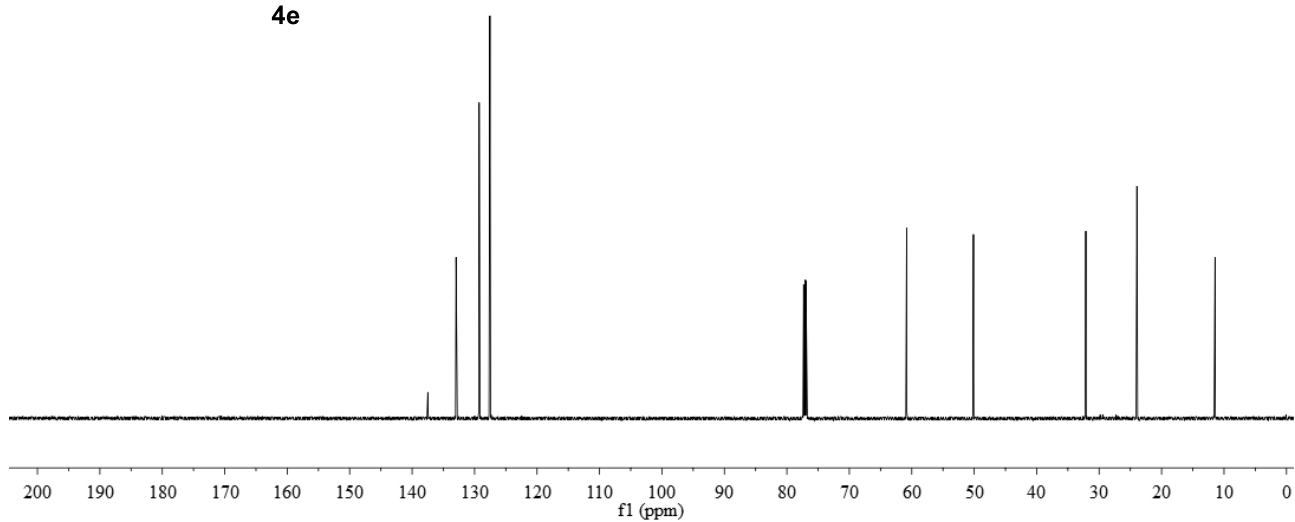

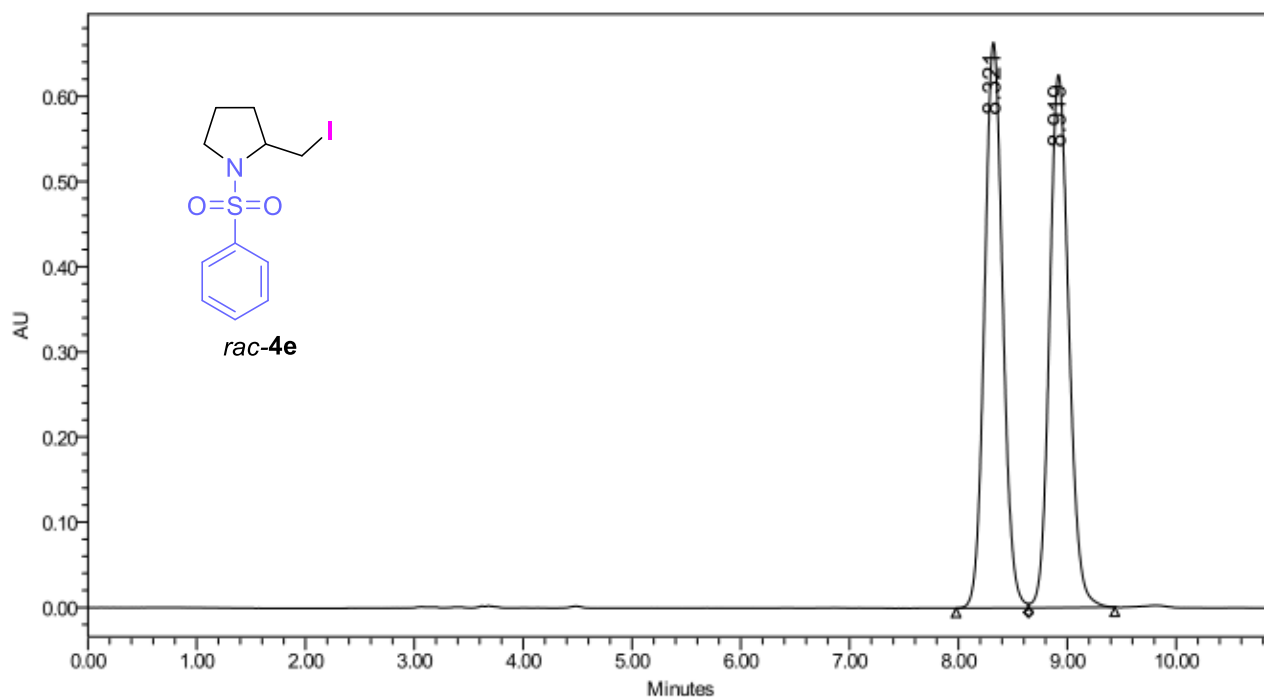

|   | RT (min) | Peak Type | Area ( $\mu\text{V}\cdot\text{sec}$ ) | % Area | Height ( $\mu\text{V}$ ) | % Height | Integration Type | Points Across Peak | Start Time (min) | End Time (min) |
|---|----------|-----------|---------------------------------------|--------|--------------------------|----------|------------------|--------------------|------------------|----------------|
| 1 | 8.321    | Unknown   | 7725308                               | 50.04  | 663466                   | 51.48    | BV               | 399                | 7.978            | 8.643          |
| 2 | 8.919    | Unknown   | 7712286                               | 49.96  | 625284                   | 48.52    | Vb               | 476                | 8.643            | 9.437          |

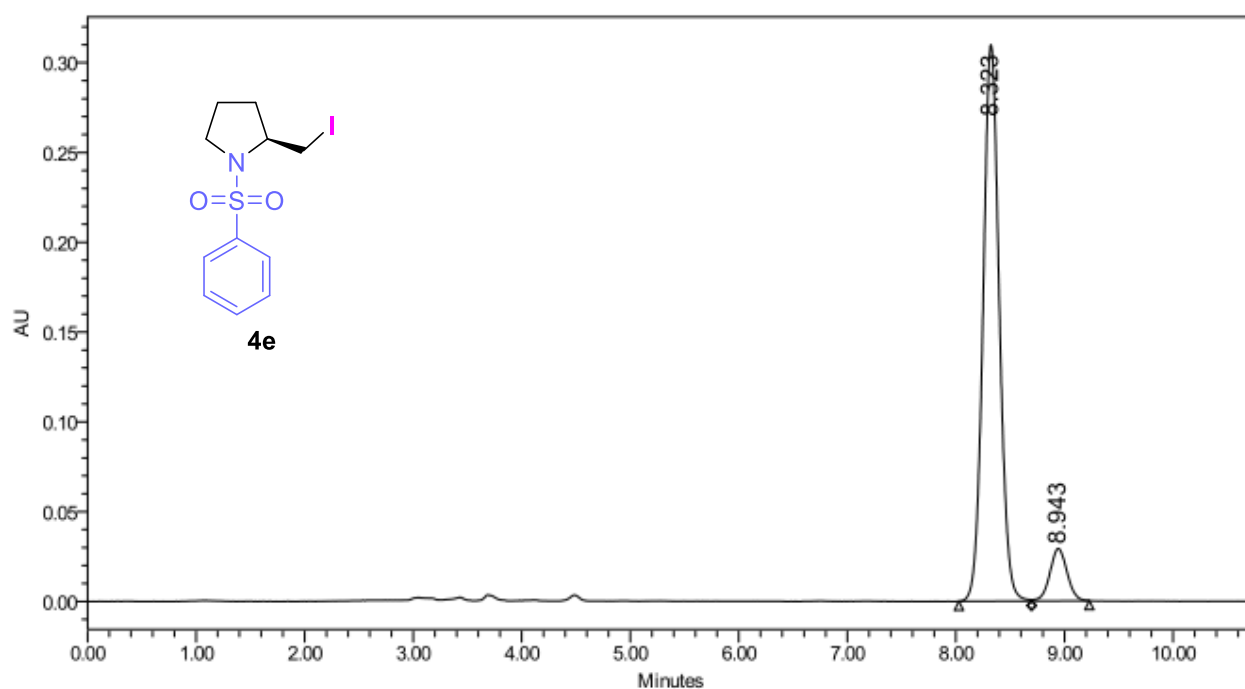

|   | RT (min) | Peak Type | Area ( $\mu\text{V}\cdot\text{sec}$ ) | % Area | Height ( $\mu\text{V}$ ) | % Height | Integration Type | Points Across Peak | Start Time (min) | End Time (min) |
|---|----------|-----------|---------------------------------------|--------|--------------------------|----------|------------------|--------------------|------------------|----------------|
| 1 | 8.323    | Unknown   | 3211549                               | 90.93  | 309855                   | 91.40    | BV               | 402                | 8.027            | 8.697          |
| 2 | 8.943    | Unknown   | 320170                                | 9.07   | 29141                    | 8.60     | Vb               | 319                | 8.697            | 9.228          |

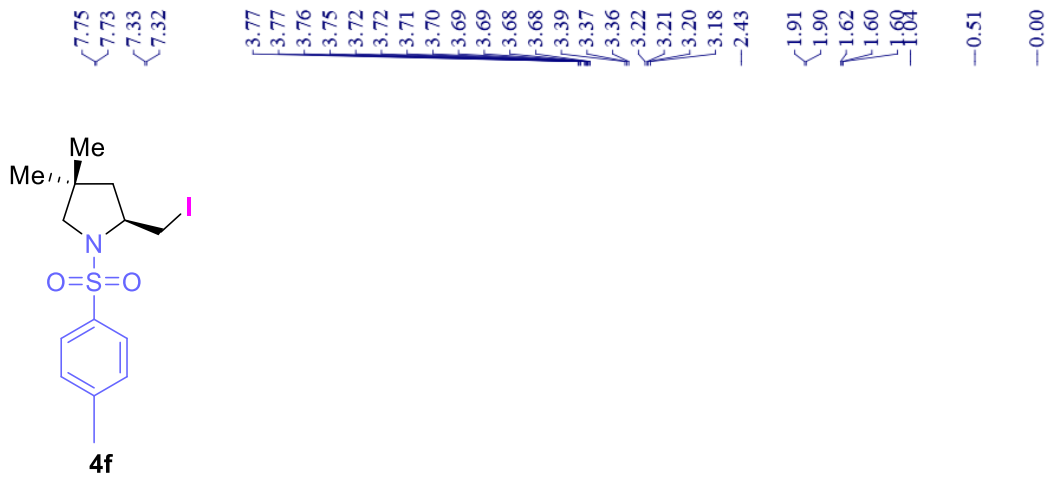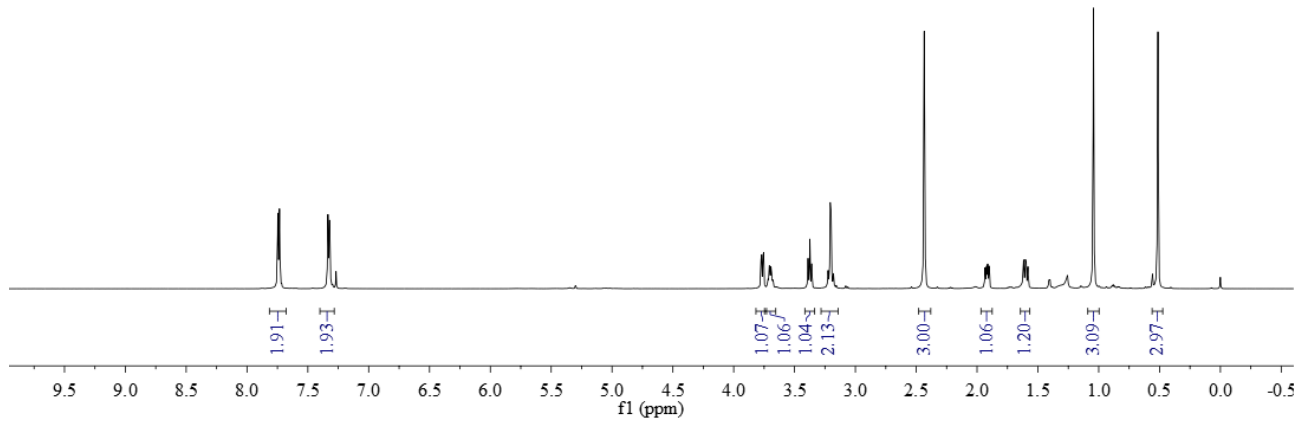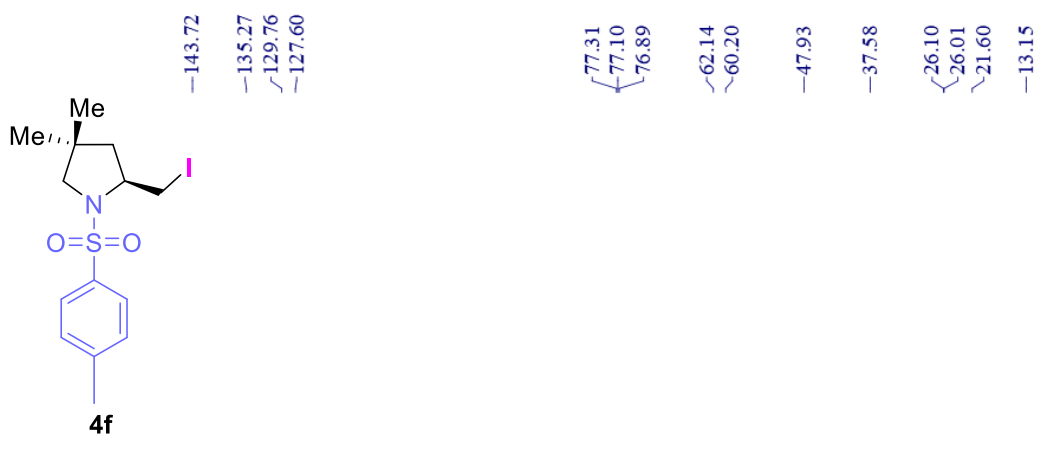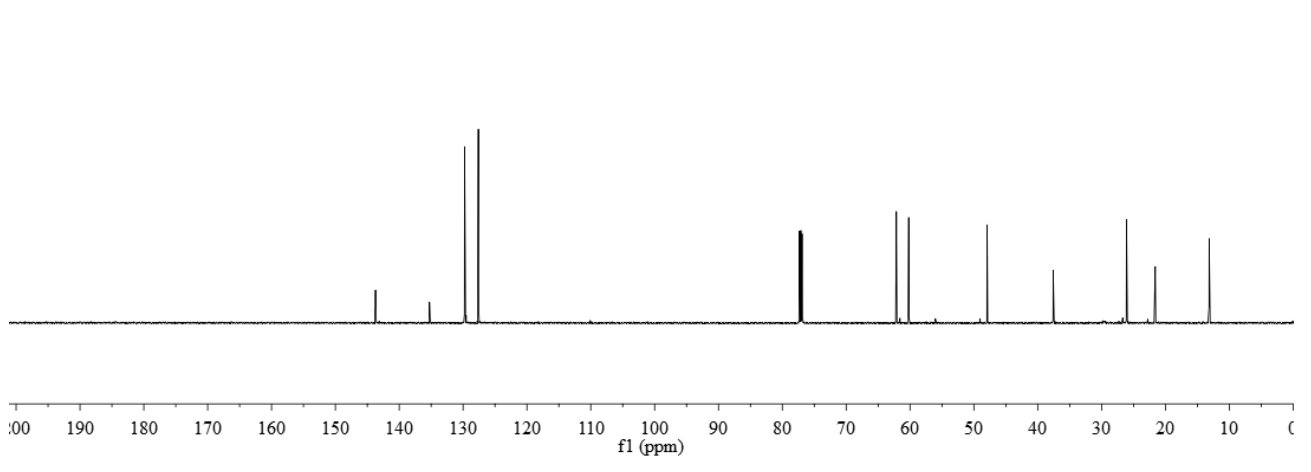

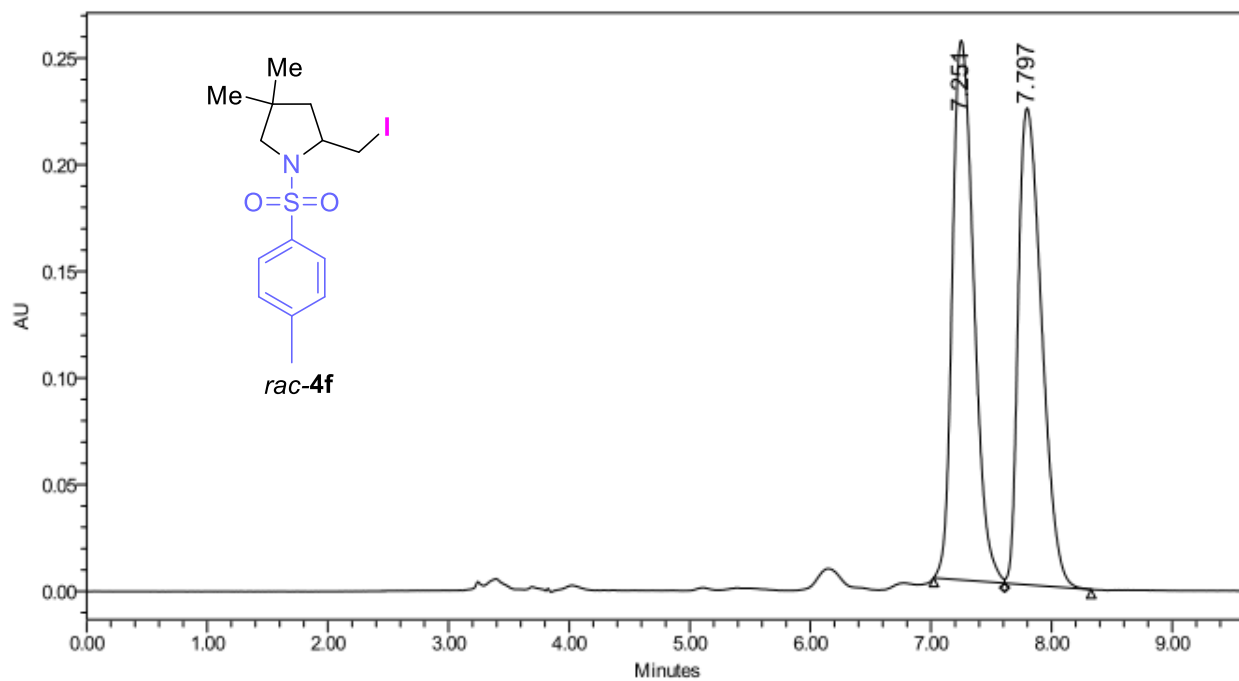

|   | RT (min) | Peak Type | Area ( $\mu\text{V}\cdot\text{sec}$ ) | % Area | Height ( $\mu\text{V}$ ) | % Height | Integration Type | Points Across Peak | Start Time (min) | End Time (min) |
|---|----------|-----------|---------------------------------------|--------|--------------------------|----------|------------------|--------------------|------------------|----------------|
| 1 | 7.251    | Unknown   | 3131971                               | 51.00  | 252991                   | 53.10    | bV               | 352                | 7.023            | 7.610          |
| 2 | 7.797    | Unknown   | 3009659                               | 49.00  | 223463                   | 46.90    | Vb               | 431                | 7.610            | 8.328          |

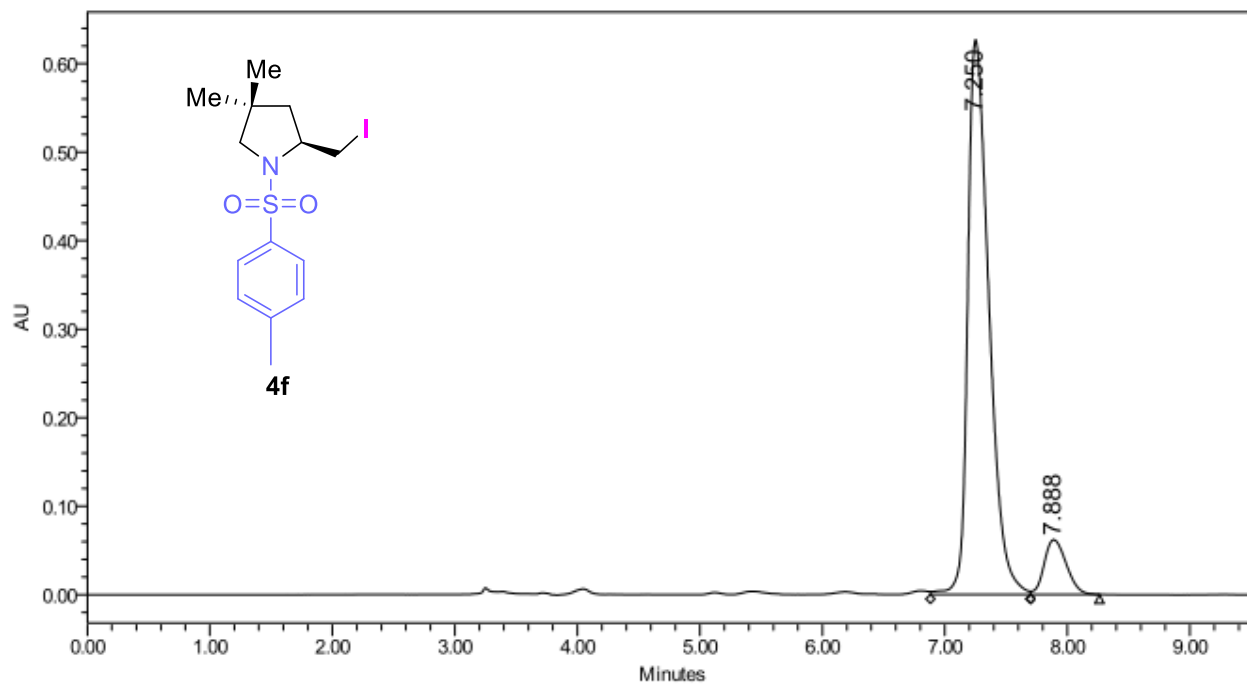

|   | RT (min) | Peak Type | Area ( $\mu\text{V}\cdot\text{sec}$ ) | % Area | Height ( $\mu\text{V}$ ) | % Height | Integration Type | Points Across Peak | Start Time (min) | End Time (min) |
|---|----------|-----------|---------------------------------------|--------|--------------------------|----------|------------------|--------------------|------------------|----------------|
| 1 | 7.250    | Unknown   | 7532174                               | 90.68  | 626572                   | 91.04    | VV               | 491                | 6.882            | 7.700          |
| 2 | 7.888    | Unknown   | 774300                                | 9.32   | 61652                    | 8.96     | Vb               | 337                | 7.700            | 8.262          |

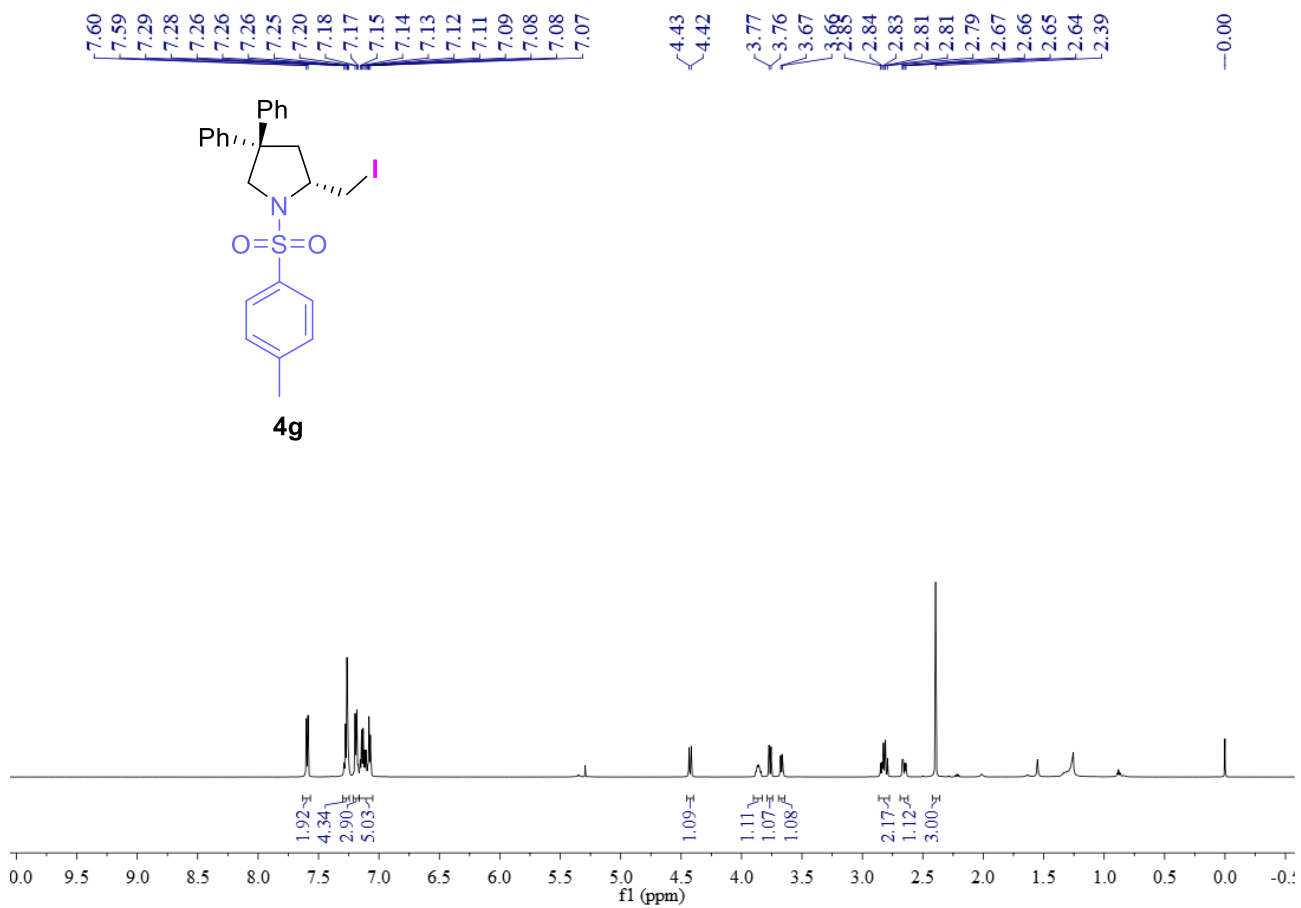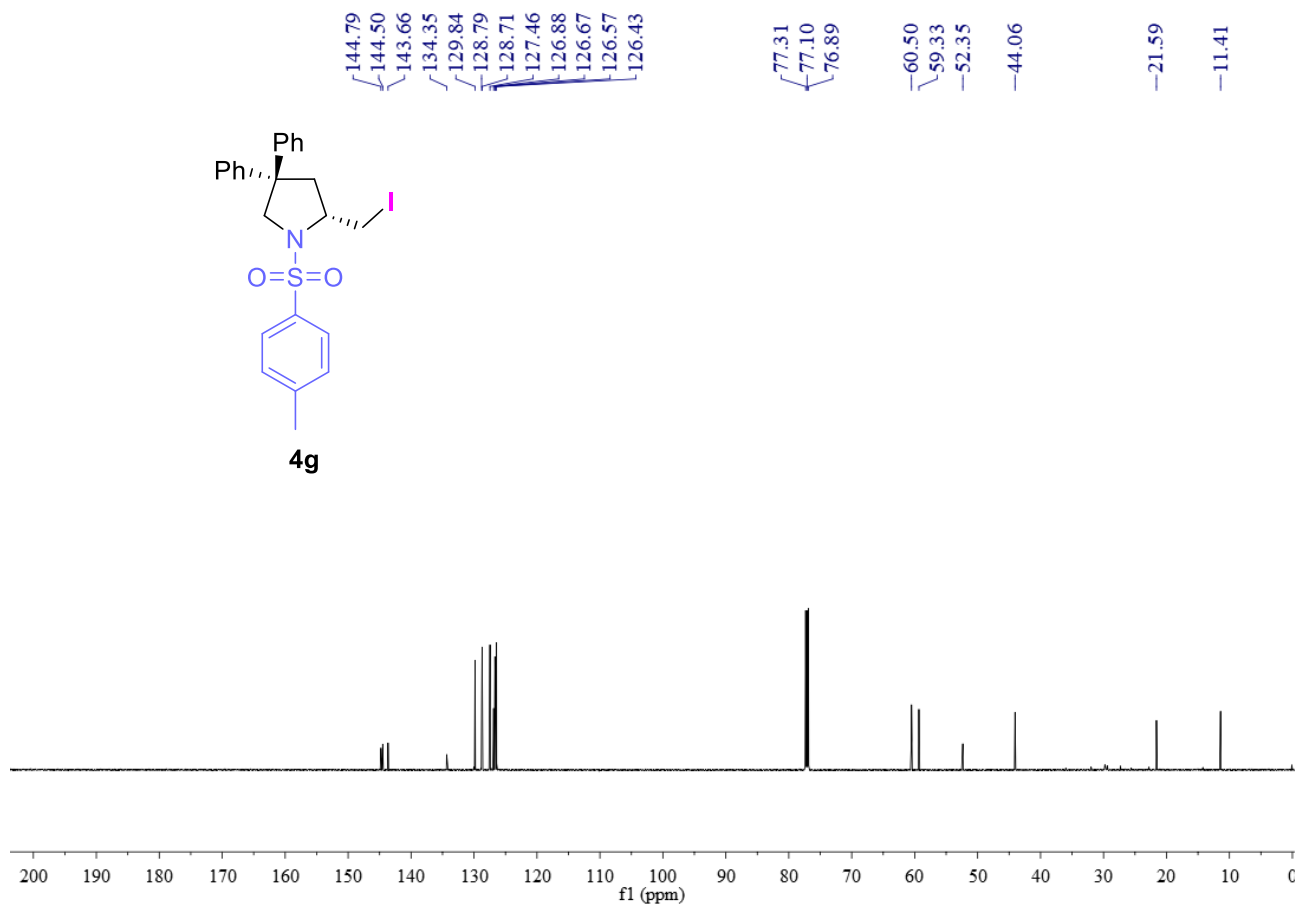



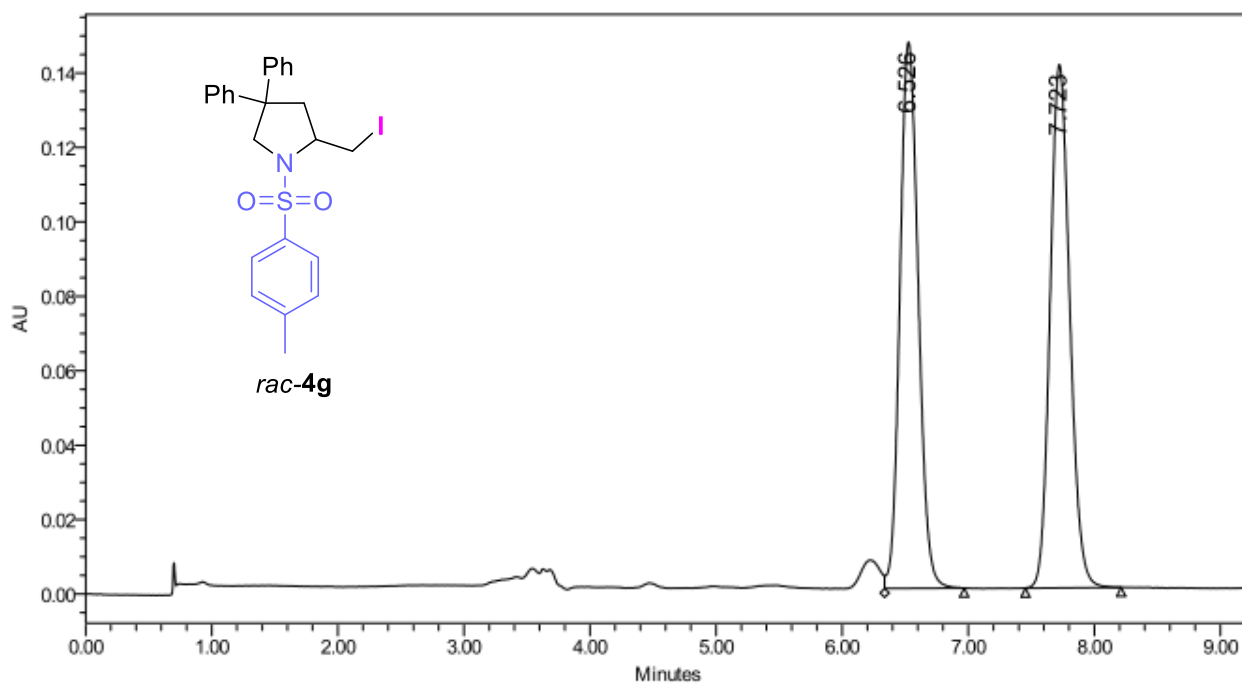

|   | RT (min) | Peak Type | Area ( $\mu\text{V}\cdot\text{sec}$ ) | % Area | Height ( $\mu\text{V}$ ) | % Height | Integration Type | Points Across Peak | Start Time (min) | End Time (min) |
|---|----------|-----------|---------------------------------------|--------|--------------------------|----------|------------------|--------------------|------------------|----------------|
| 1 | 6.526    | Unknown   | 1485517                               | 49.42  | 146753                   | 51.06    | VB               | 379                | 6.337            | 6.968          |
| 2 | 7.723    | Unknown   | 1520529                               | 50.58  | 140634                   | 48.94    | BB               | 456                | 7.453            | 8.213          |

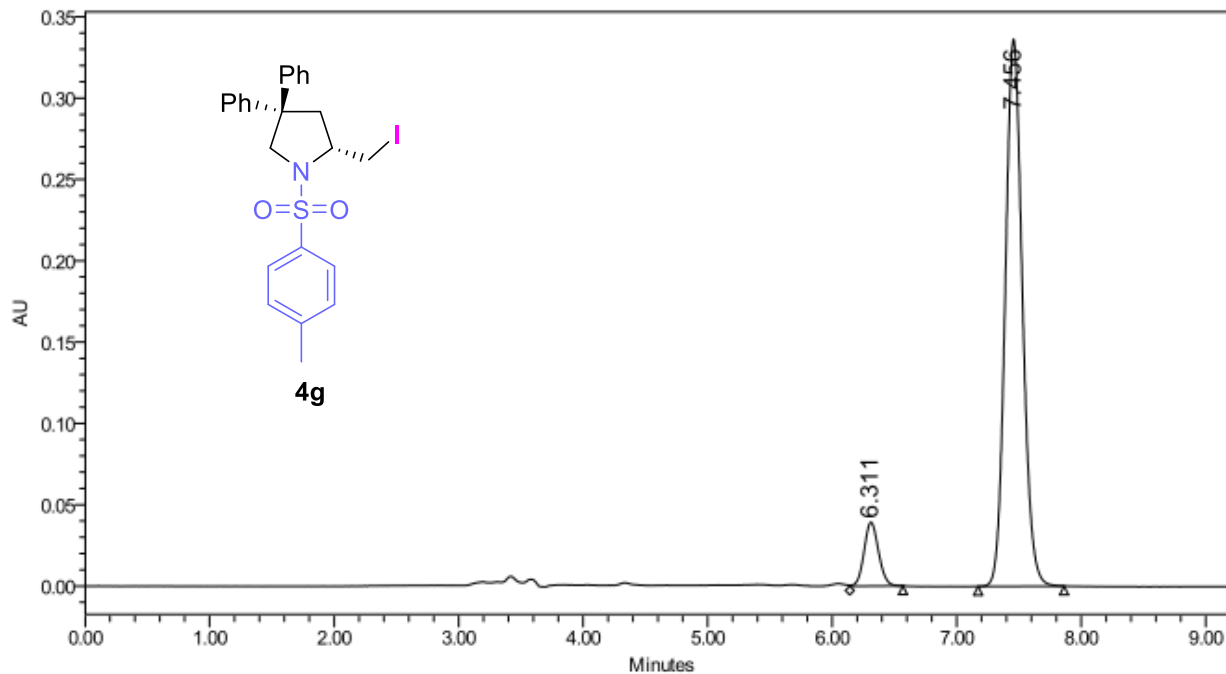

|   | RT (min) | Peak Type | Area ( $\mu\text{V}\cdot\text{sec}$ ) | % Area | Height ( $\mu\text{V}$ ) | % Height | Integration Type | Points Across Peak | Start Time (min) | End Time (min) |
|---|----------|-----------|---------------------------------------|--------|--------------------------|----------|------------------|--------------------|------------------|----------------|
| 1 | 6.311    | Unknown   | 316353                                | 8.96   | 39120                    | 10.42    | Vb               | 256                | 6.140            | 6.567          |
| 2 | 7.456    | Unknown   | 3212963                               | 91.04  | 336355                   | 89.58    | BB               | 414                | 7.172            | 7.862          |

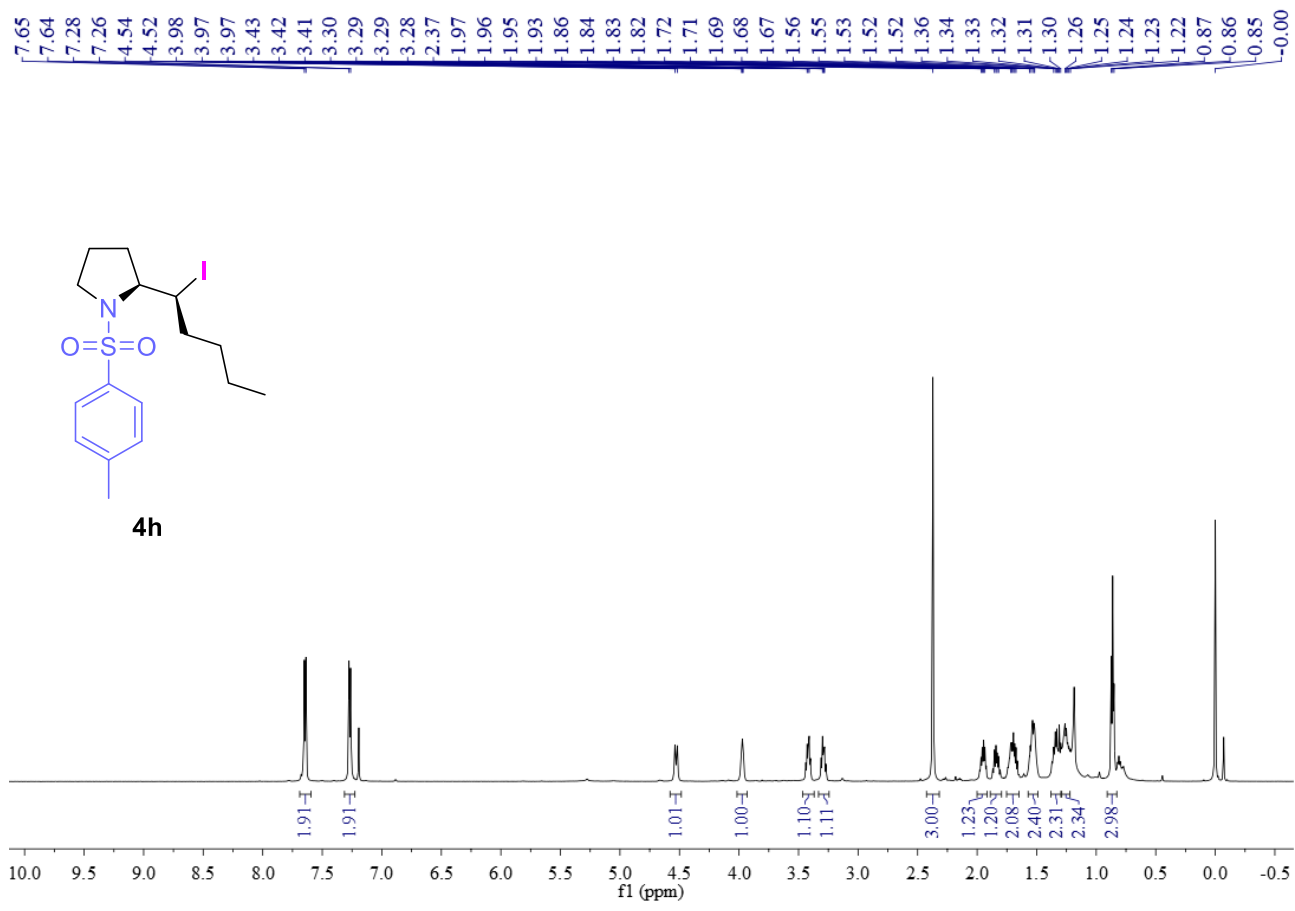

Chemical Shifts (ppm):

- 143.81
- 134.20
- 129.89
- 127.70
- 77.31
- 77.10
- 76.89
- 65.85
- 51.63
- 41.06
- 32.30
- 31.98
- 29.23
- 24.40
- 22.03
- 21.60
- 14.04

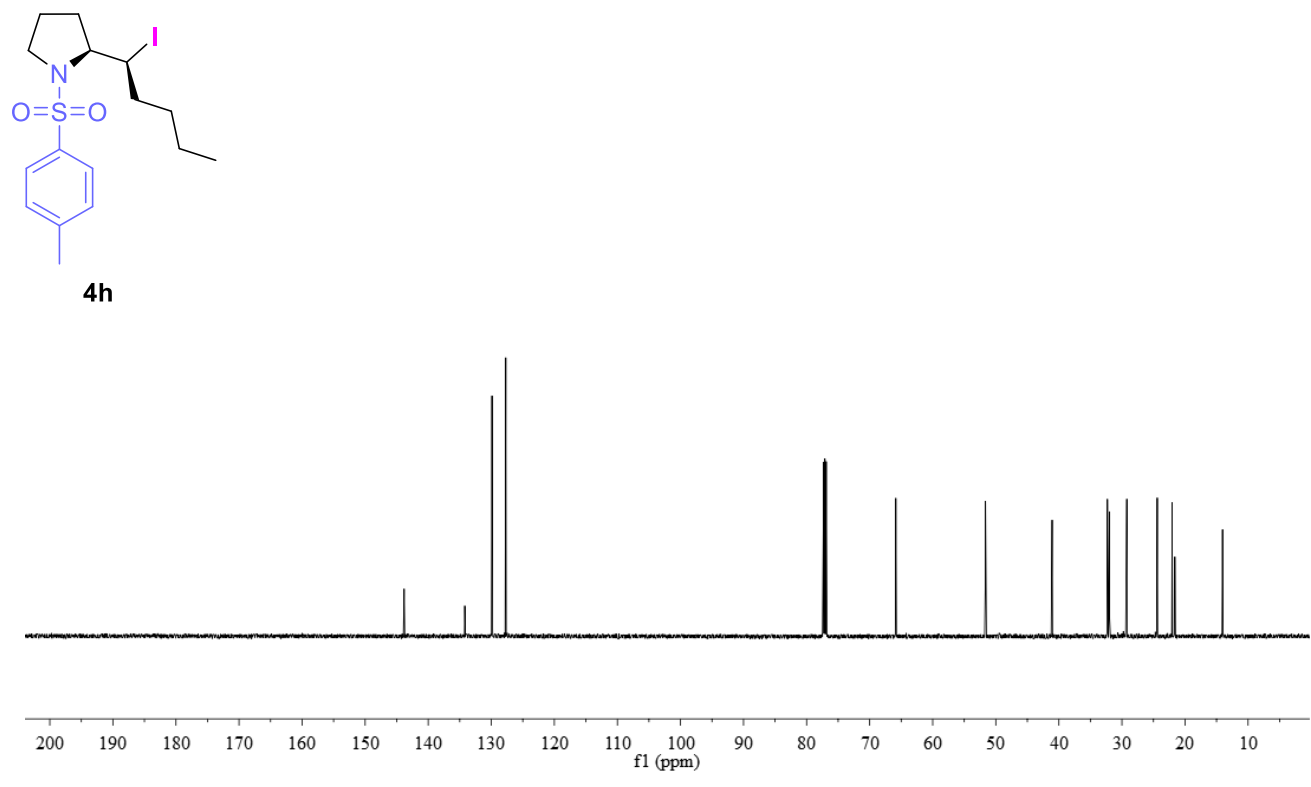

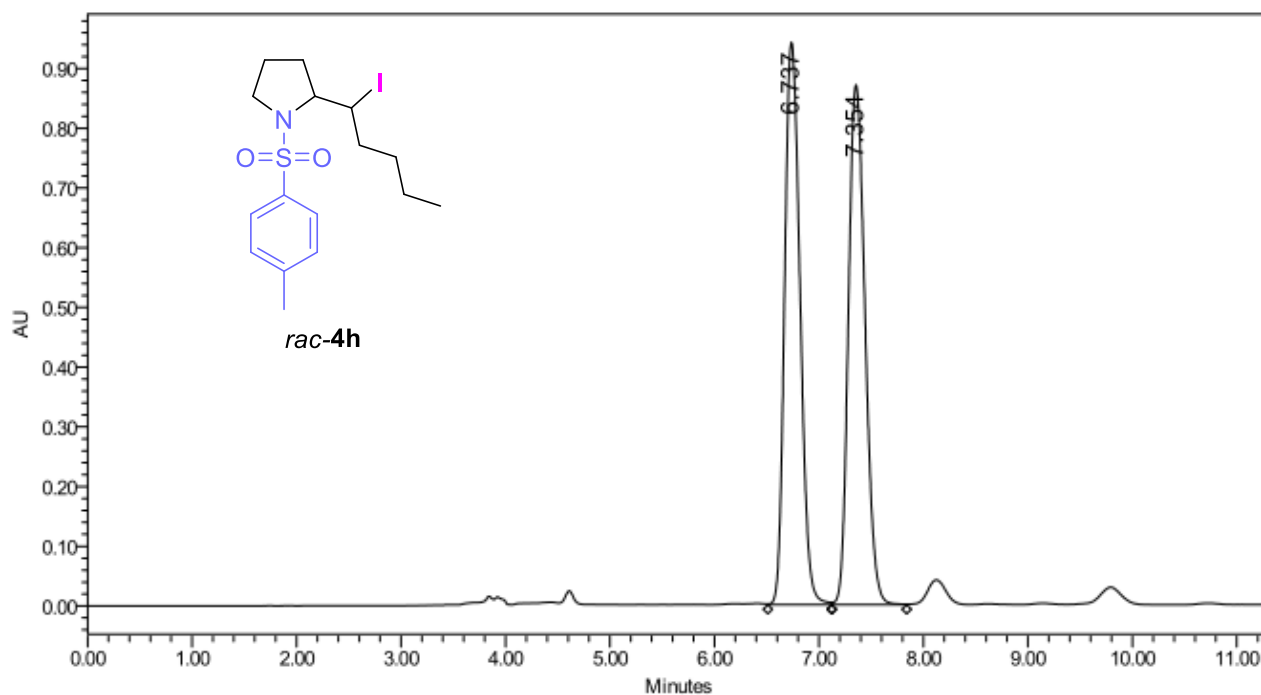

|   | RT (min) | Peak Type | Area ( $\mu\text{V}\cdot\text{sec}$ ) | % Area | Height ( $\mu\text{V}$ ) | % Height | Integration Type | Points Across Peak | Start Time (min) | End Time (min) |
|---|----------|-----------|---------------------------------------|--------|--------------------------|----------|------------------|--------------------|------------------|----------------|
| 1 | 6.737    | Unknown   | 9678607                               | 50.08  | 942031                   | 51.97    | VV               | 368                | 6.510            | 7.123          |
| 2 | 7.354    | Unknown   | 9649408                               | 49.92  | 870759                   | 48.03    | VV               | 430                | 7.123            | 7.840          |

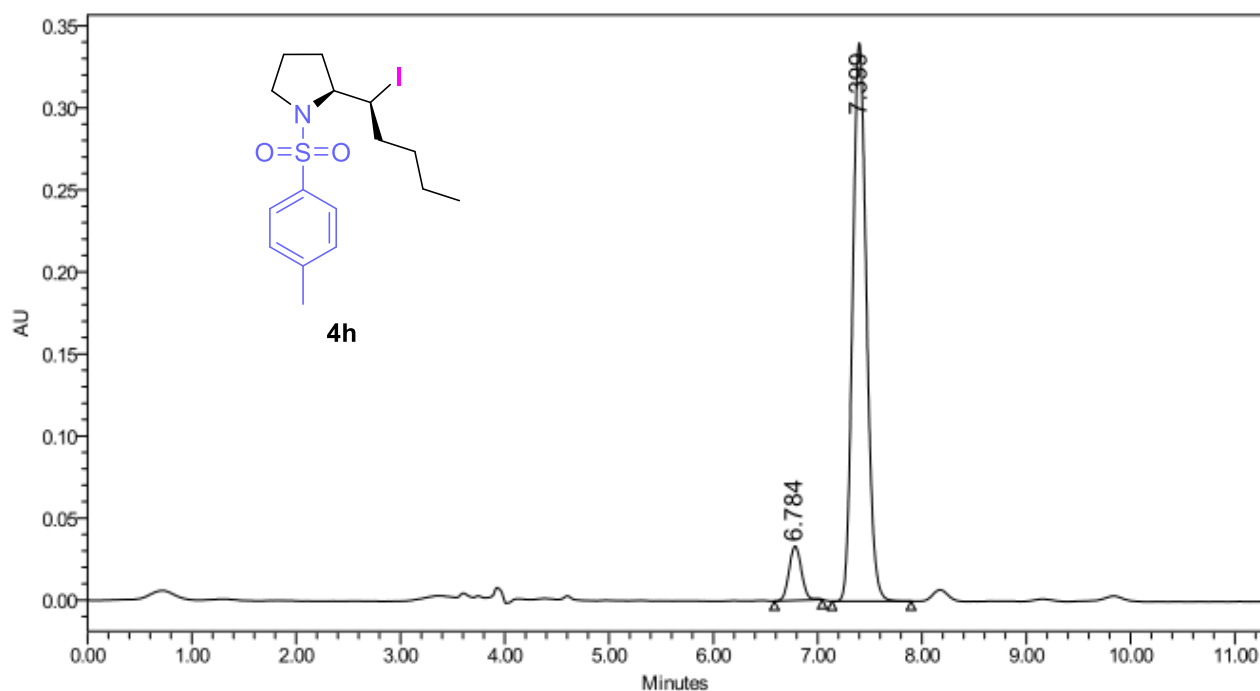

|   | RT (min) | Peak Type | Area ( $\mu\text{V}\cdot\text{sec}$ ) | % Area | Height ( $\mu\text{V}$ ) | % Height | Integration Type | Points Across Peak | Start Time (min) | End Time (min) |
|---|----------|-----------|---------------------------------------|--------|--------------------------|----------|------------------|--------------------|------------------|----------------|
| 1 | 6.784    | Unknown   | 272737                                | 8.02   | 33064                    | 8.86     | bb               | 274                | 6.587            | 7.043          |
| 2 | 7.399    | Unknown   | 3126090                               | 91.98  | 340194                   | 91.14    | bb               | 455                | 7.138            | 7.897          |

7.72  
7.71  
7.40  
7.38  
7.37  
7.36  
7.35  
7.32  
7.31  
7.30  
7.28  
4.71  
4.71  
4.70  
4.64  
4.63  
4.59  
4.57  
4.57  
4.00  
4.00  
3.99  
3.98  
3.87  
3.86  
3.45  
3.44  
3.43  
3.42  
3.34  
3.32  
3.31  
3.31  
2.43  
2.05  
2.04  
2.03  
1.85  
1.83  
1.82  
1.81  
1.75  
1.74  
1.73  
1.72  
1.33  
1.31  
1.30  
1.29  
1.28  
0.00

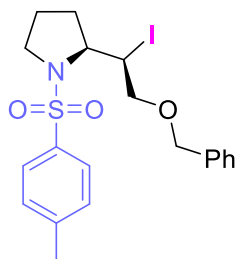

4i

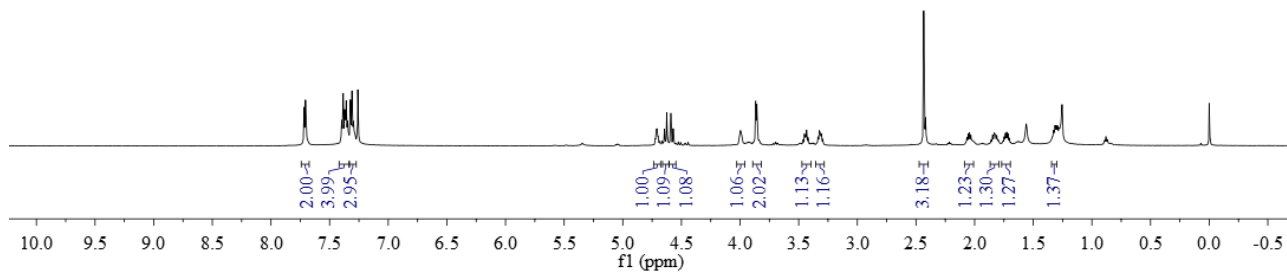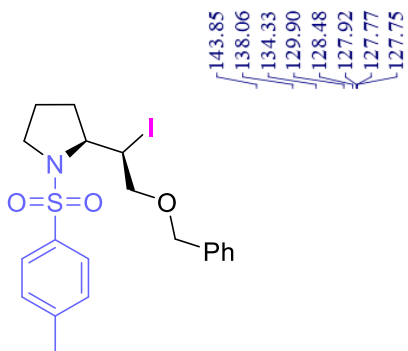

4i

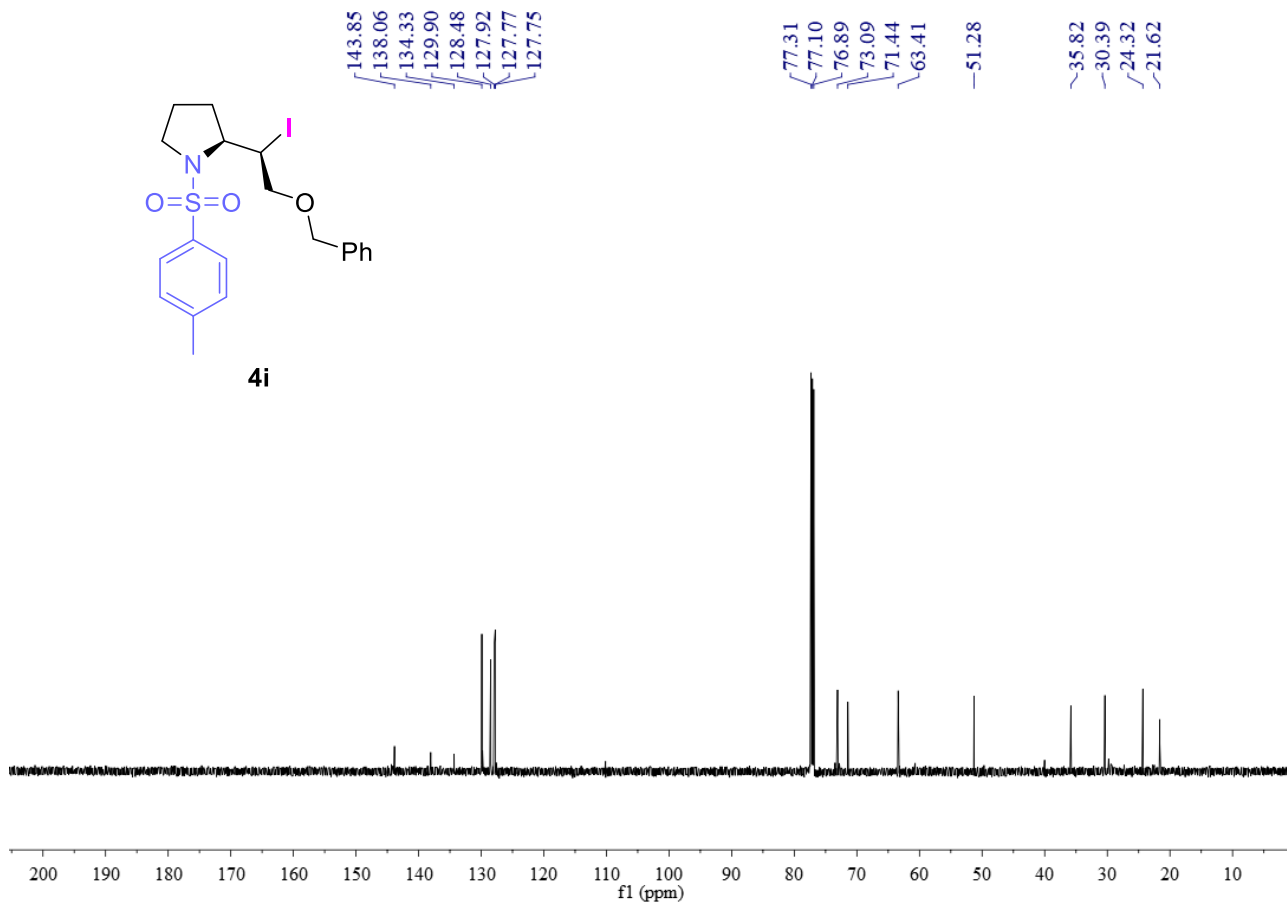

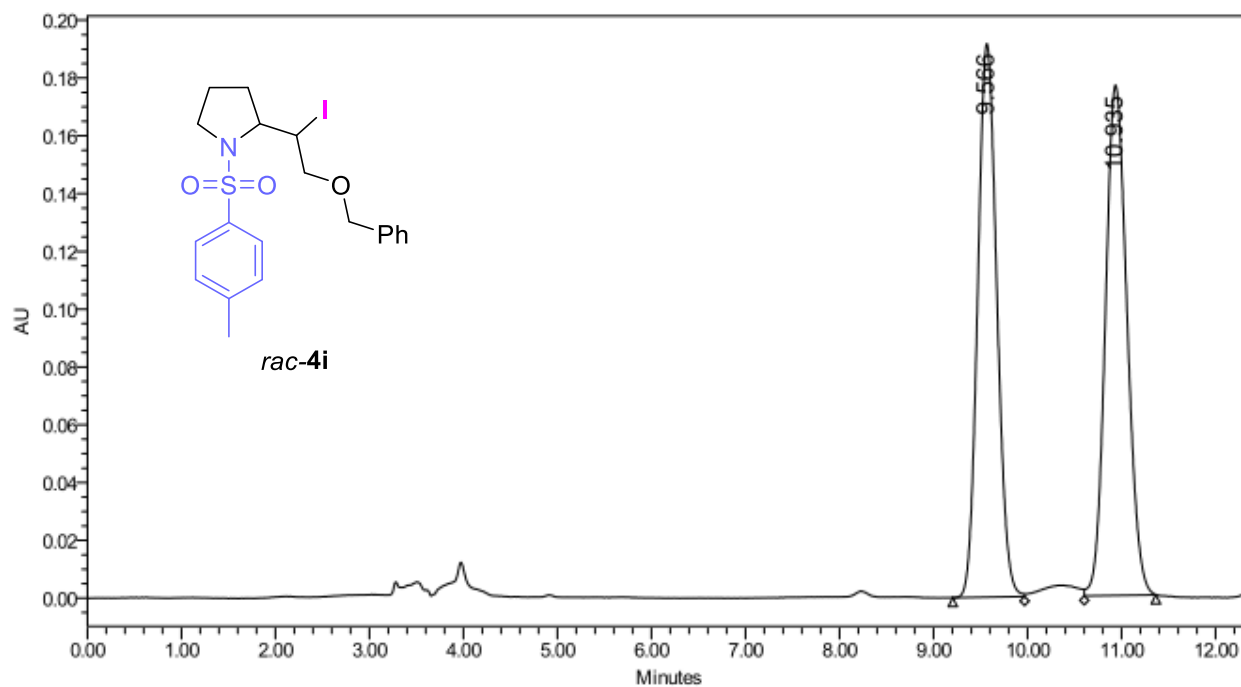

|   | RT (min) | Peak Type | Area ( $\mu\text{V}\cdot\text{sec}$ ) | % Area | Height ( $\mu\text{V}$ ) | % Height | Integration Type | Points Across Peak | Start Time (min) | End Time (min) |
|---|----------|-----------|---------------------------------------|--------|--------------------------|----------|------------------|--------------------|------------------|----------------|
| 1 | 9.566    | Unknown   | 2705543                               | 49.00  | 191504                   | 52.03    | bV               | 459                | 9.203            | 9.968          |
| 2 | 10.935   | Unknown   | 2816259                               | 51.00  | 176571                   | 47.97    | Vb               | 457                | 10.602           | 11.363         |

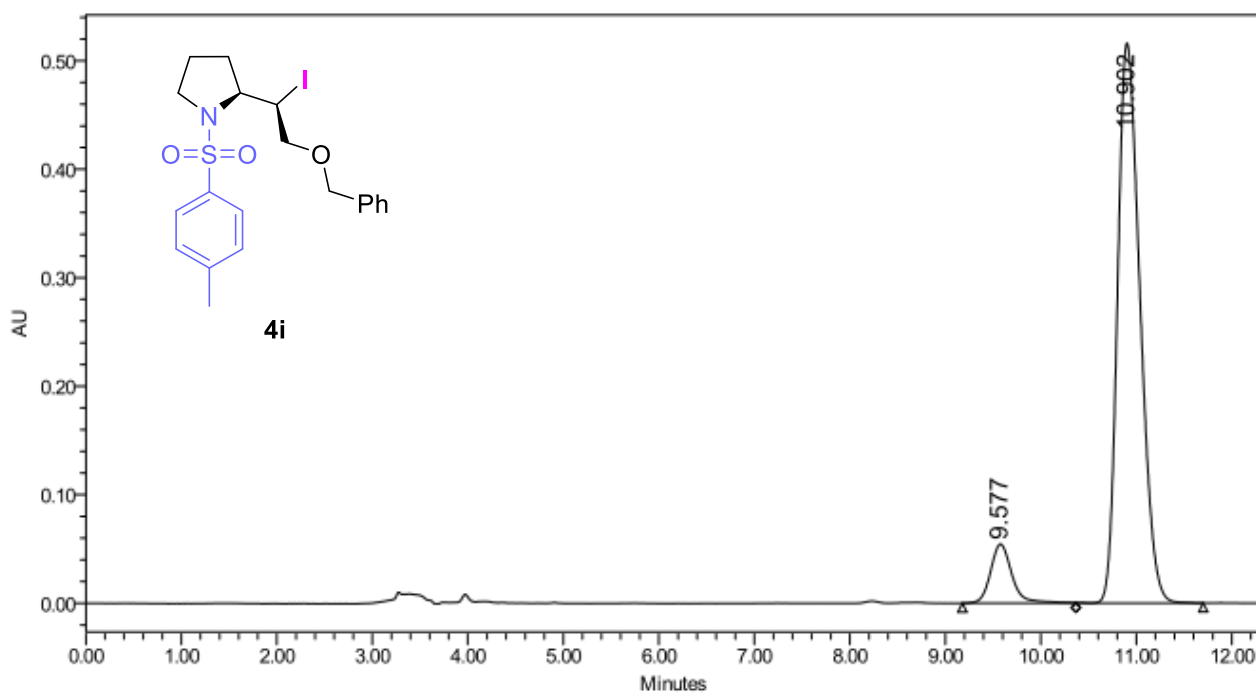

|   | RT (min) | Peak Type | Area ( $\mu\text{V}\cdot\text{sec}$ ) | % Area | Height ( $\mu\text{V}$ ) | % Height | Integration Type | Points Across Peak | Start Time (min) | End Time (min) |
|---|----------|-----------|---------------------------------------|--------|--------------------------|----------|------------------|--------------------|------------------|----------------|
| 1 | 9.577    | Unknown   | 847602                                | 9.16   | 54319                    | 9.52     | Bv               | 713                | 9.178            | 10.367         |
| 2 | 10.902   | Unknown   | 8405895                               | 90.84  | 516178                   | 90.48    | vB               | 800                | 10.367           | 11.700         |

7.73  
7.72  
7.34  
7.33  
4.69  
4.68  
3.99  
3.98  
3.98  
3.78  
3.77  
3.76  
3.50  
3.49  
3.48  
3.33  
3.32  
3.31  
3.30  
2.44  
2.10  
2.09  
2.08  
2.07  
1.84  
1.82  
1.82  
1.80  
1.79  
1.78  
1.77  
1.76  
1.75  
1.60  
1.59  
1.58  
1.57  
1.56  
1.42  
1.41  
1.40  
1.38  
1.37  
1.36  
1.35  
1.34  
1.33  
0.95  
0.92

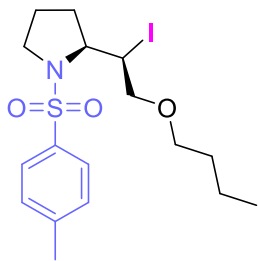

4j

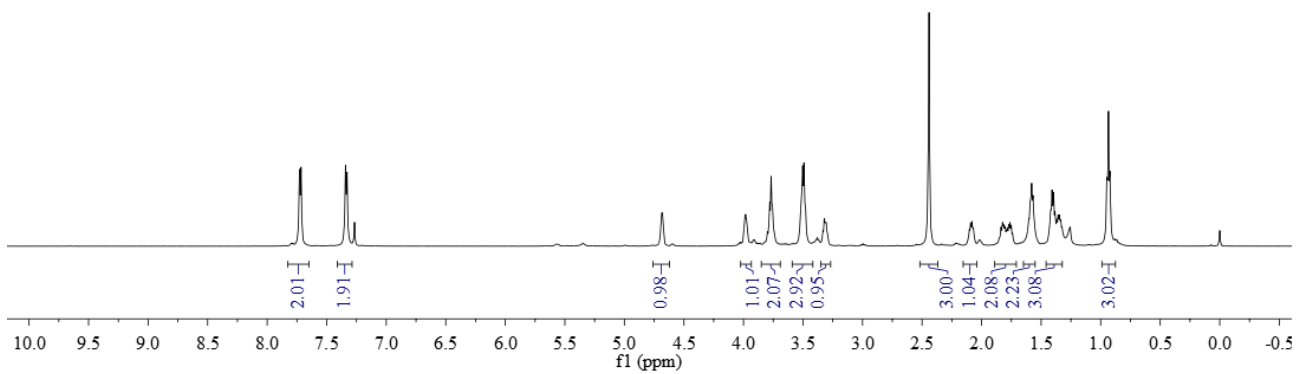

143.82  
134.28  
129.88  
127.73  
77.31  
77.10  
76.89  
71.74  
70.95  
63.61  
51.27  
36.21  
31.87  
30.24  
24.28  
21.61  
19.51  
14.00

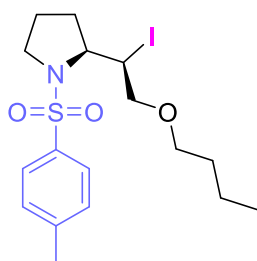

4j

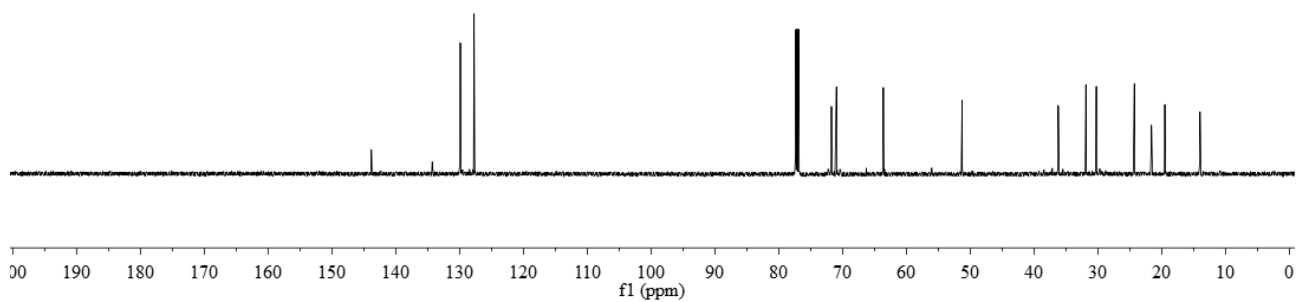

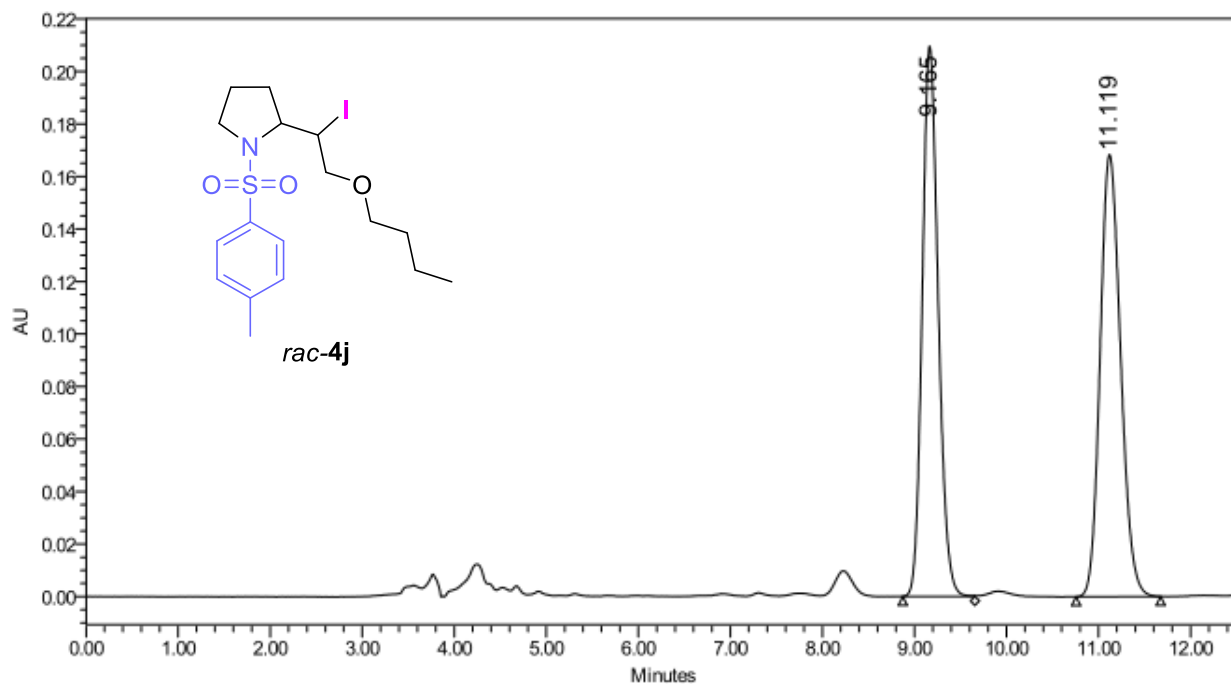

|   | RT (min) | Peak Type | Area ( $\mu\text{V}\cdot\text{sec}$ ) | % Area | Height ( $\mu\text{V}$ ) | % Height | Integration Type | Points Across Peak | Start Time (min) | End Time (min) |
|---|----------|-----------|---------------------------------------|--------|--------------------------|----------|------------------|--------------------|------------------|----------------|
| 1 | 9.165    | Unknown   | 2533606                               | 49.31  | 209570                   | 55.46    | BV               | 471                | 8.872            | 9.657          |
| 2 | 11.119   | Unknown   | 2604999                               | 50.69  | 168326                   | 44.54    | BB               | 551                | 10.757           | 11.675         |

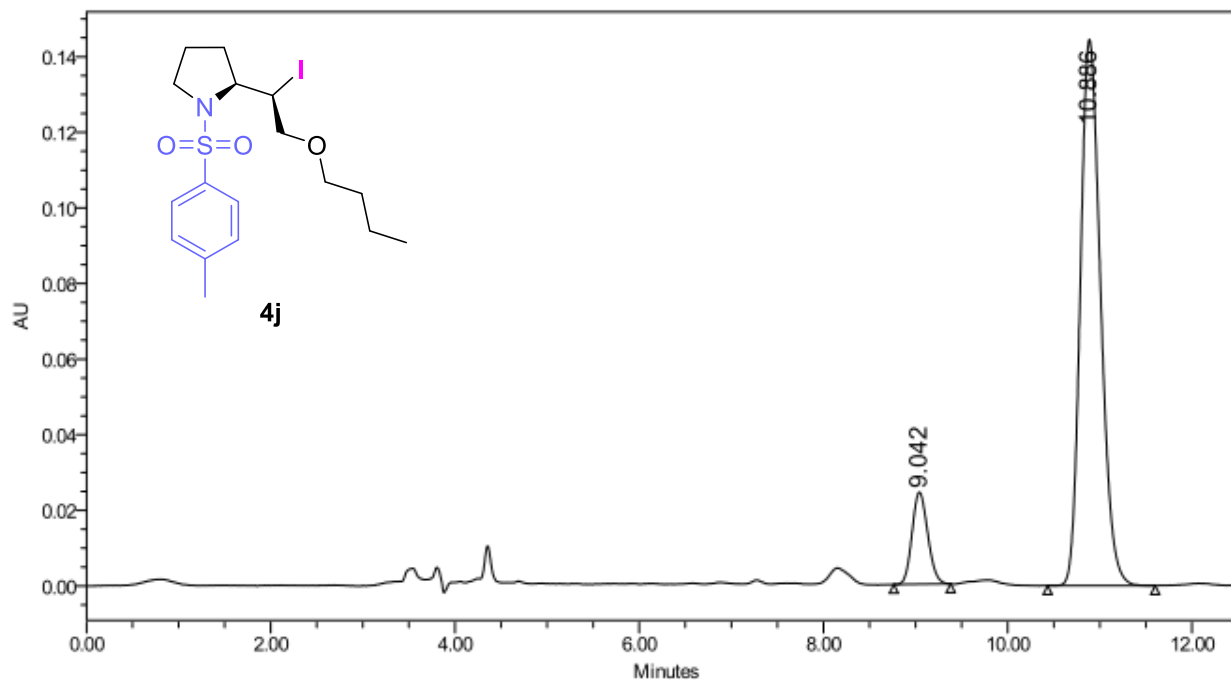

|   | RT (min) | Peak Type | Area ( $\mu\text{V}\cdot\text{sec}$ ) | % Area | Height ( $\mu\text{V}$ ) | % Height | Integration Type | Points Across Peak | Start Time (min) | End Time (min) |
|---|----------|-----------|---------------------------------------|--------|--------------------------|----------|------------------|--------------------|------------------|----------------|
| 1 | 9.042    | Unknown   | 287380                                | 11.55  | 24278                    | 14.38    | bb               | 370                | 8.763            | 9.380          |
| 2 | 10.886   | Unknown   | 2199915                               | 88.45  | 144503                   | 85.62    | bb               | 701                | 10.432           | 11.600         |

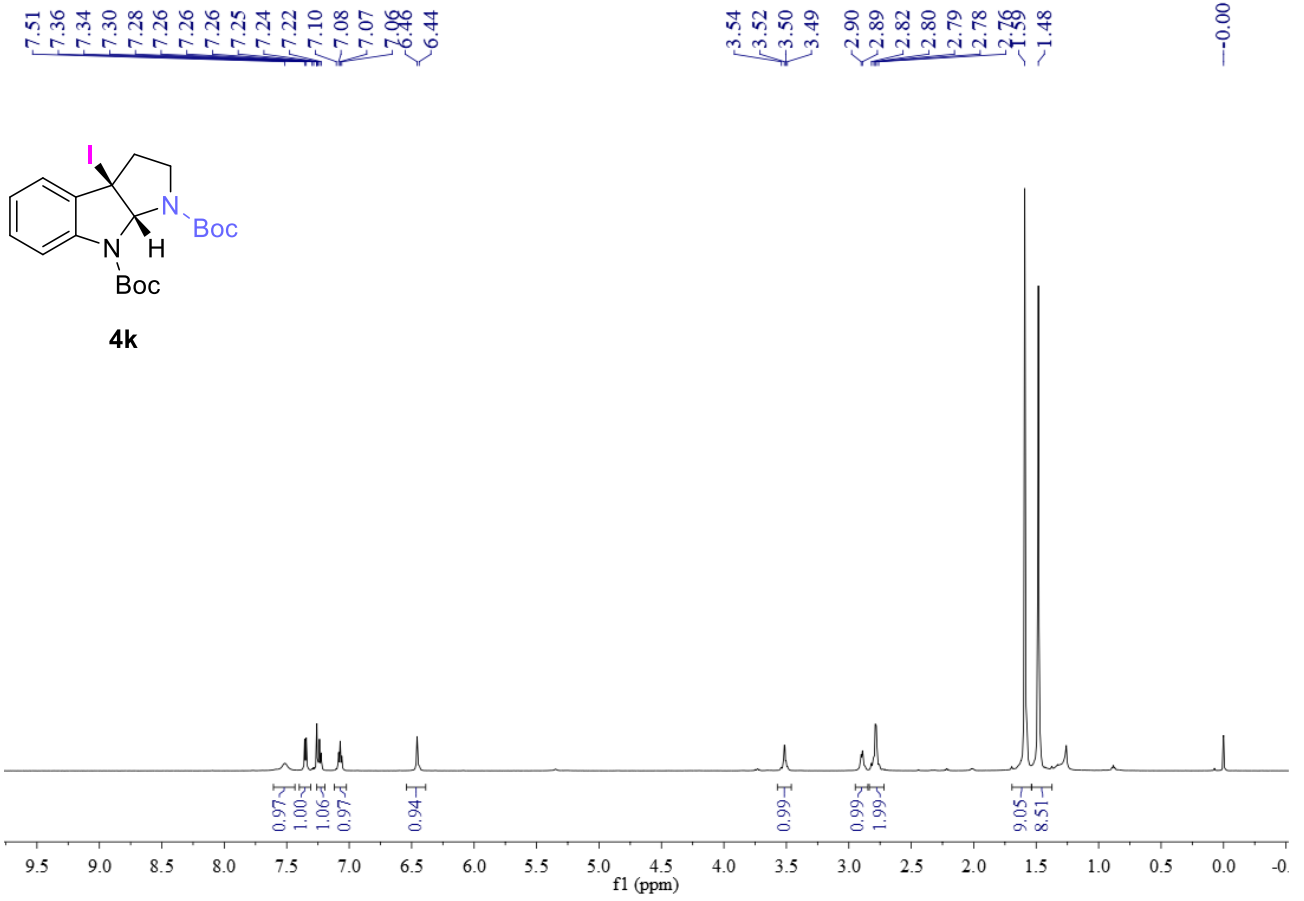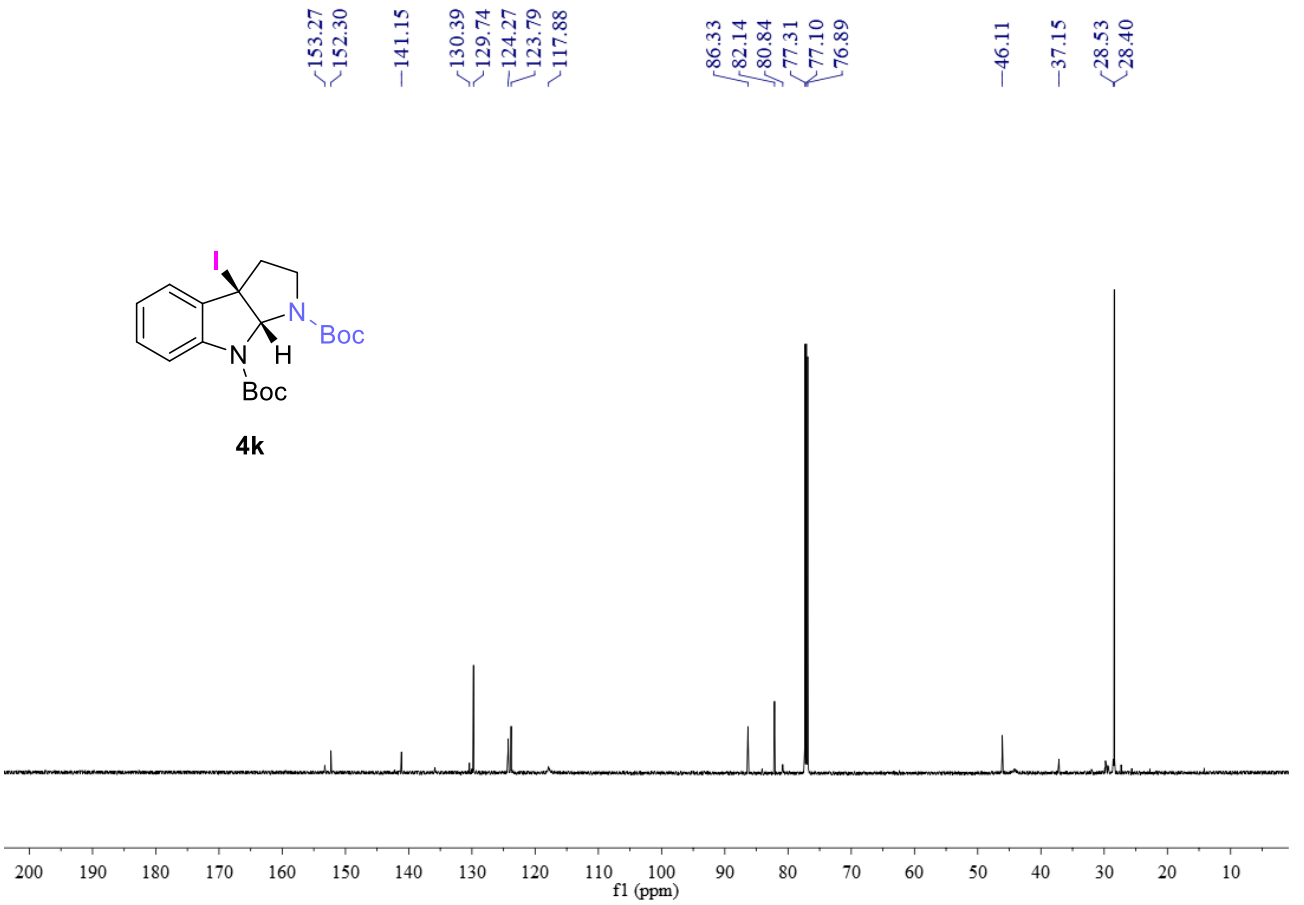



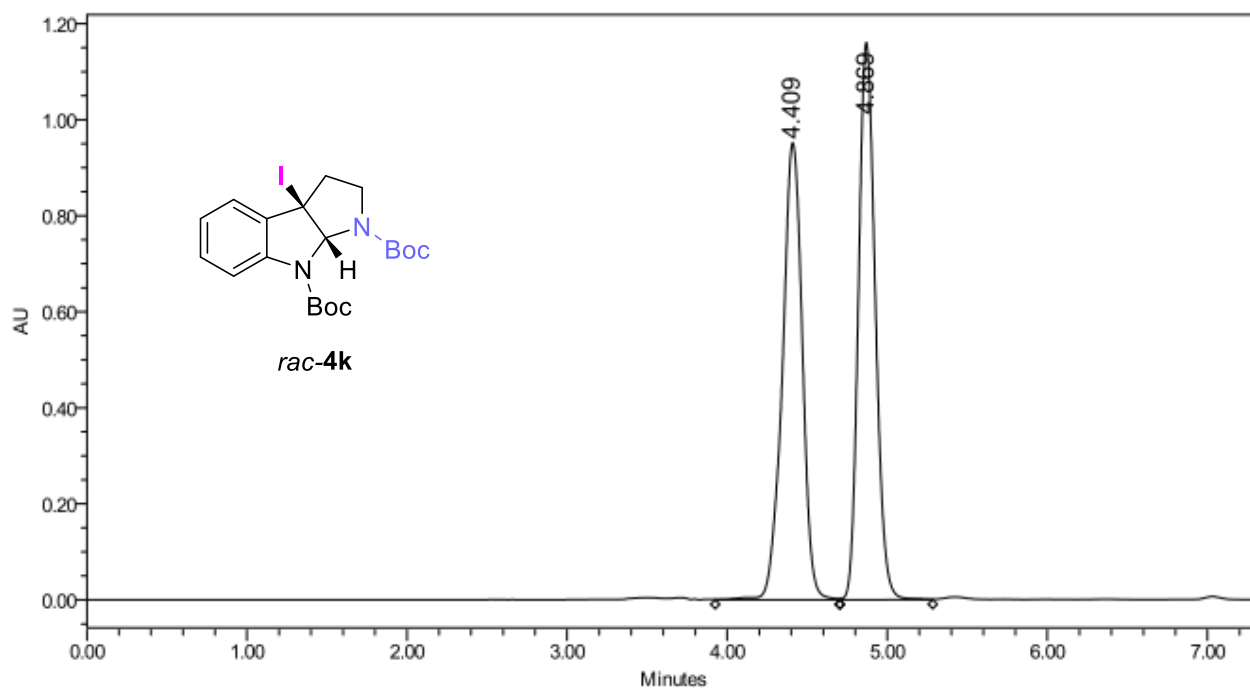

|   | RT (min) | Peak Type | Area ( $\mu\text{V}\cdot\text{sec}$ ) | % Area | Height ( $\mu\text{V}$ ) | % Height | Integration Type | Points Across Peak | Start Time (min) | End Time (min) |
|---|----------|-----------|---------------------------------------|--------|--------------------------|----------|------------------|--------------------|------------------|----------------|
| 1 | 4.409    | Unknown   | 8245129                               | 49.33  | 951590                   | 45.06    | VV               | 467                | 3.925            | 4.703          |
| 2 | 4.869    | Unknown   | 8469532                               | 50.67  | 1160456                  | 54.94    | VV               | 348                | 4.703            | 5.283          |

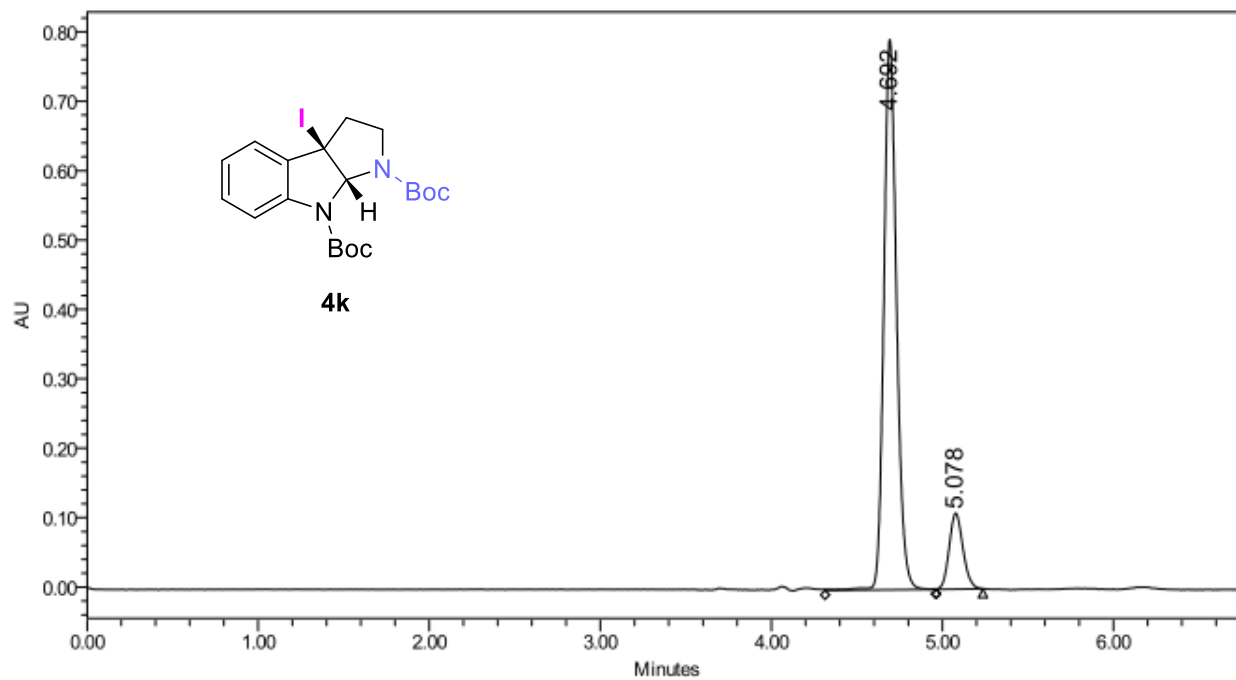

|   | RT (min) | Peak Type | Area ( $\mu\text{V}\cdot\text{sec}$ ) | % Area | Height ( $\mu\text{V}$ ) | % Height | Integration Type | Points Across Peak | Start Time (min) | End Time (min) |
|---|----------|-----------|---------------------------------------|--------|--------------------------|----------|------------------|--------------------|------------------|----------------|
| 1 | 4.692    | Unknown   | 4077522                               | 86.97  | 792806                   | 87.90    | VV               | 390                | 4.313            | 4.963          |
| 2 | 5.078    | Unknown   | 611083                                | 13.03  | 109157                   | 12.10    | VB               | 164                | 4.963            | 5.237          |

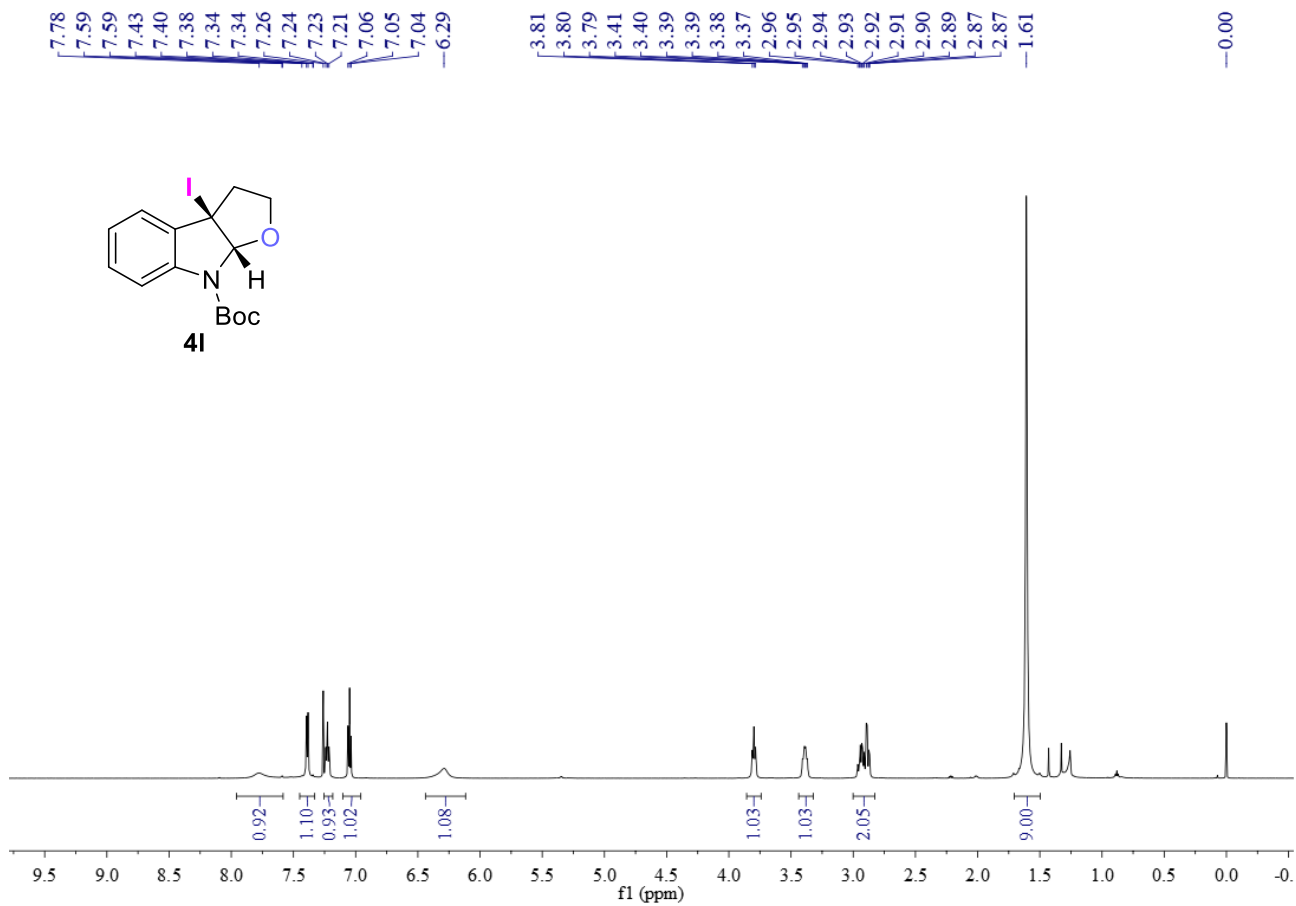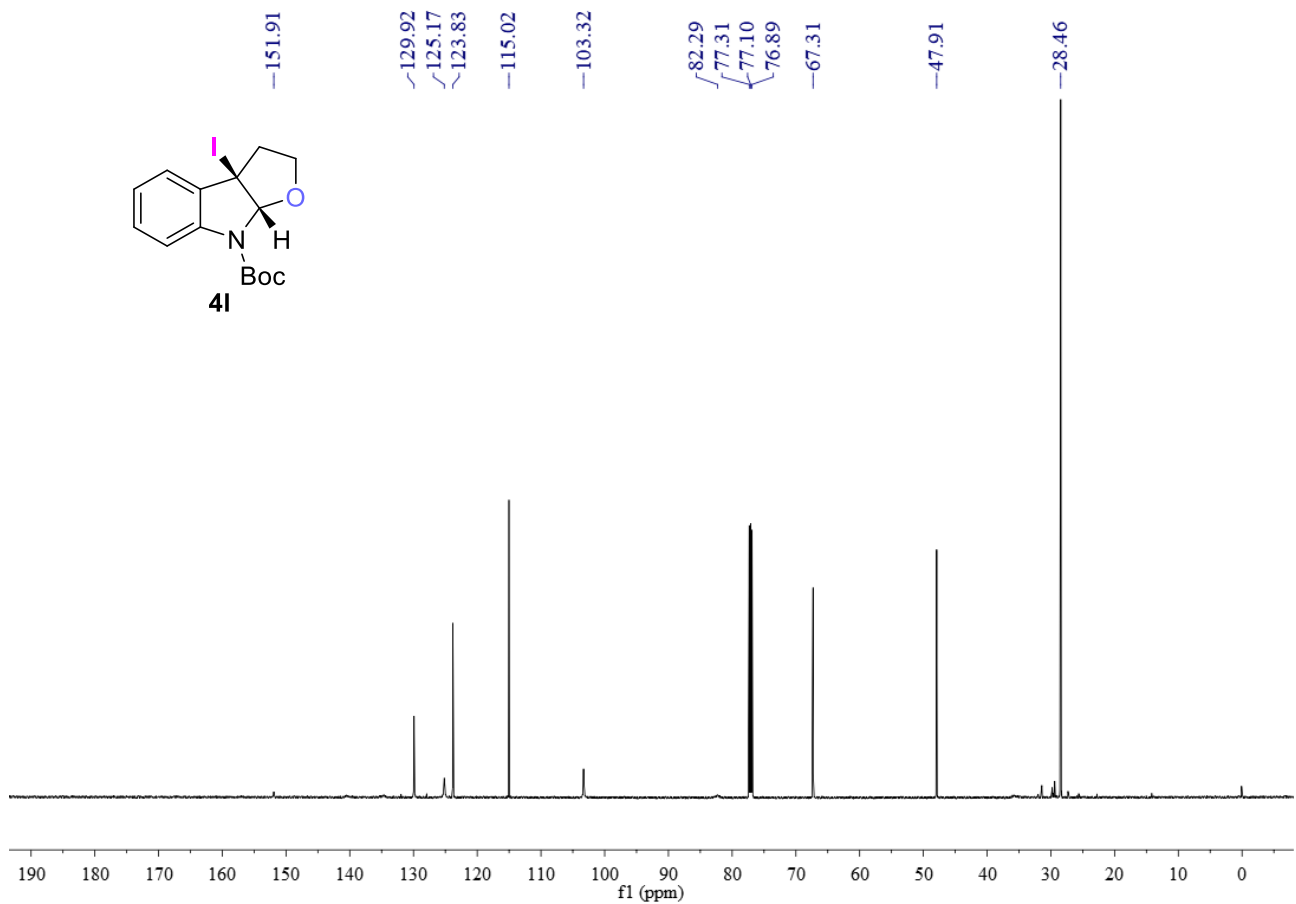

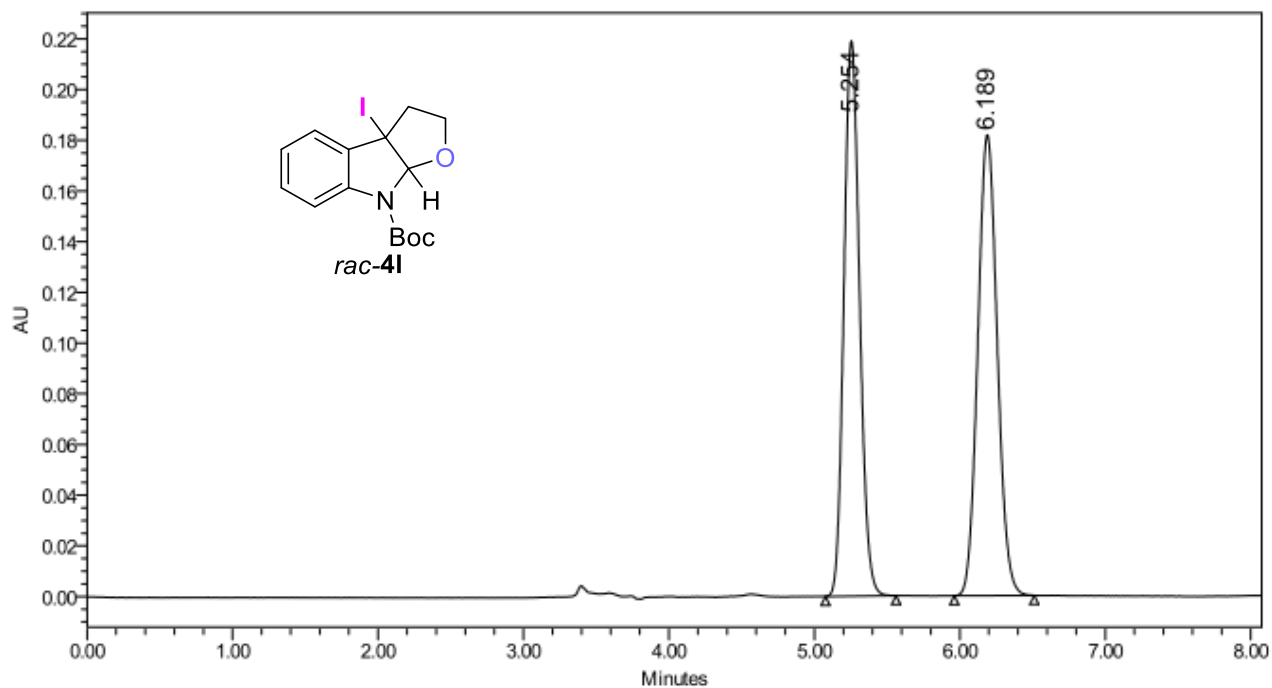

| RT (min) | Peak Type | Area ( $\mu\text{V}\cdot\text{sec}$ ) | % Area | Height ( $\mu\text{V}$ ) | % Height | Integration Type | Points Across Peak | Start Time (min) | End Time (min) |
|----------|-----------|---------------------------------------|--------|--------------------------|----------|------------------|--------------------|------------------|----------------|
| 1        | Unknown   | 1634392                               | 49.17  | 219062                   | 54.64    | BB               | 291                | 5.077            | 5.562          |
| 2        | Unknown   | 1689816                               | 50.83  | 181835                   | 45.36    | BB               | 330                | 5.962            | 6.512          |

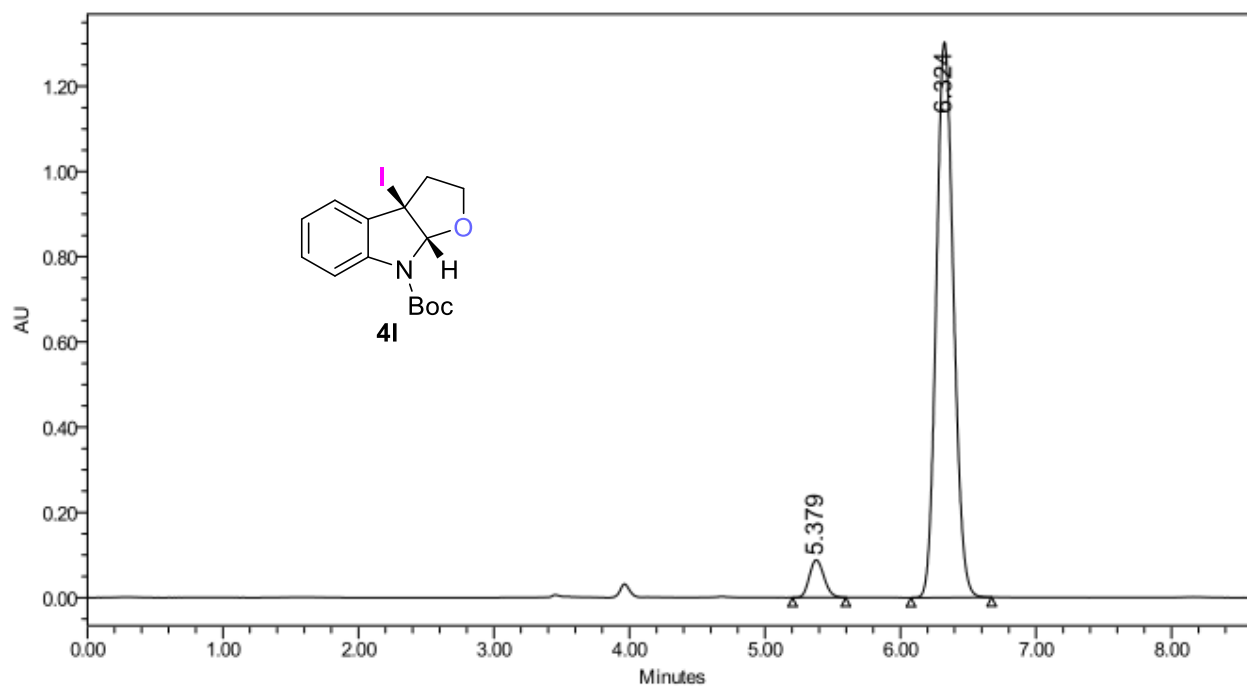

| RT (min) | Peak Type | Area ( $\mu\text{V}\cdot\text{sec}$ ) | % Area | Height ( $\mu\text{V}$ ) | % Height | Integration Type | Points Across Peak | Start Time (min) | End Time (min) |
|----------|-----------|---------------------------------------|--------|--------------------------|----------|------------------|--------------------|------------------|----------------|
| 1        | Unknown   | 667761                                | 5.47   | 88344                    | 6.35     | Bb               | 236                | 5.203            | 5.597          |
| 2        | Unknown   | 11532057                              | 94.53  | 1303663                  | 93.65    | Bb               | 357                | 6.078            | 6.673          |

7.74  
7.73  
7.34  
7.33  
7.26

3.89  
3.87  
3.82  
3.81  
3.50  
3.48  
3.47  
3.45  
3.44  
3.16  
3.15  
3.13  
3.12  
2.44

1.93  
1.87  
1.85  
1.84  
1.82  
1.72  
1.71  
1.69  
1.59  
1.56  
0.00

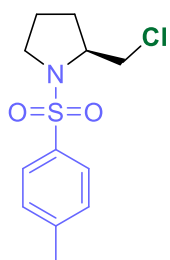

5a

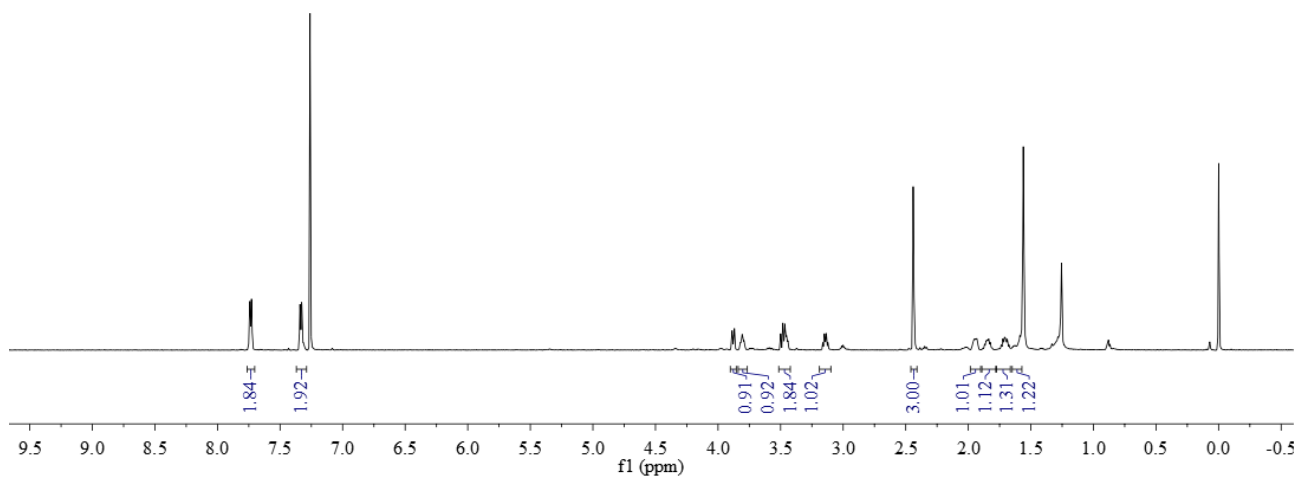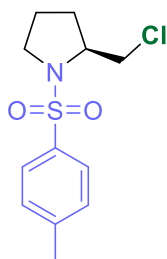

5a

143.80  
134.25  
129.89  
127.66

77.31  
77.10  
76.89

60.61

49.73  
47.08

29.40  
23.90  
21.62

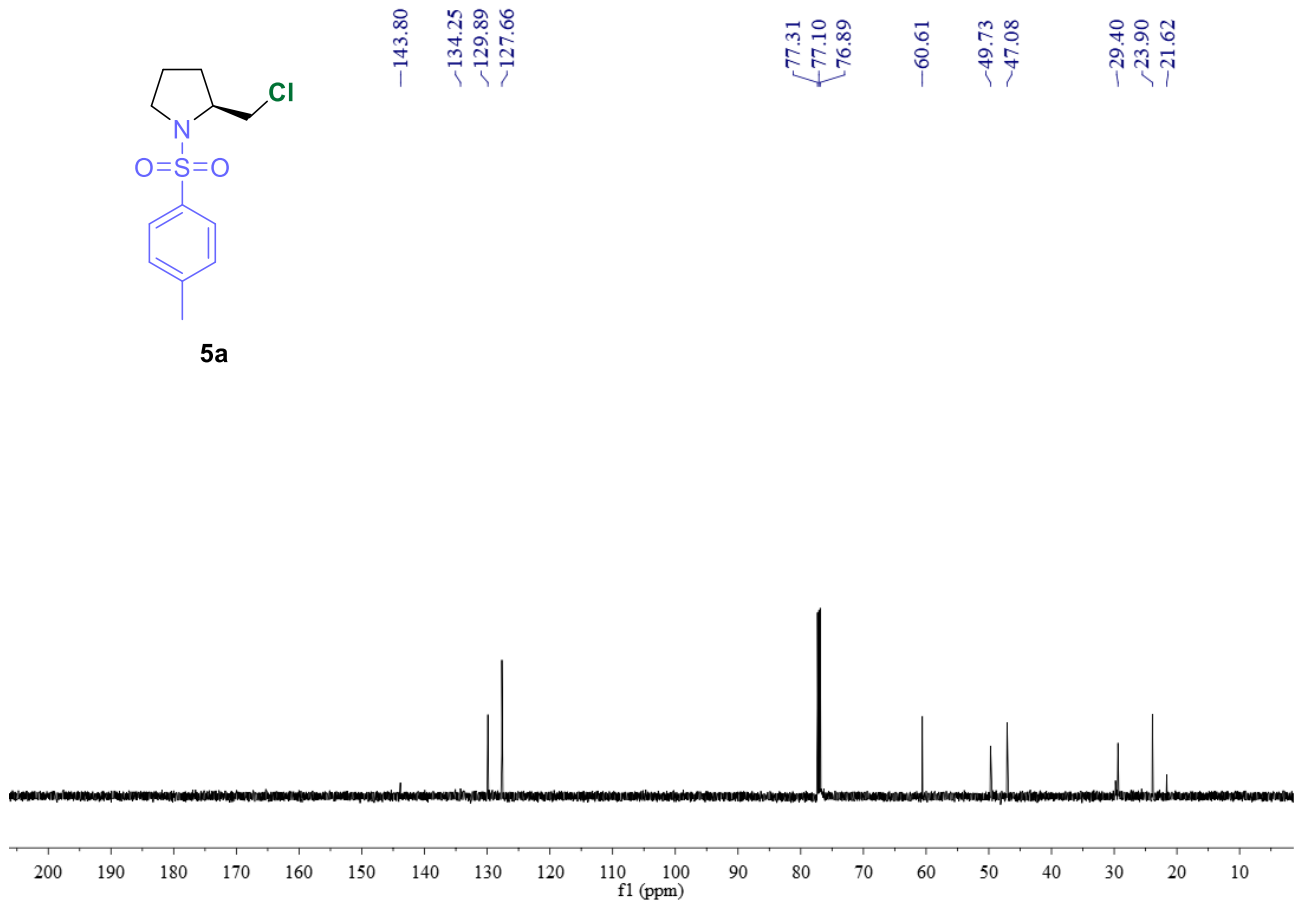

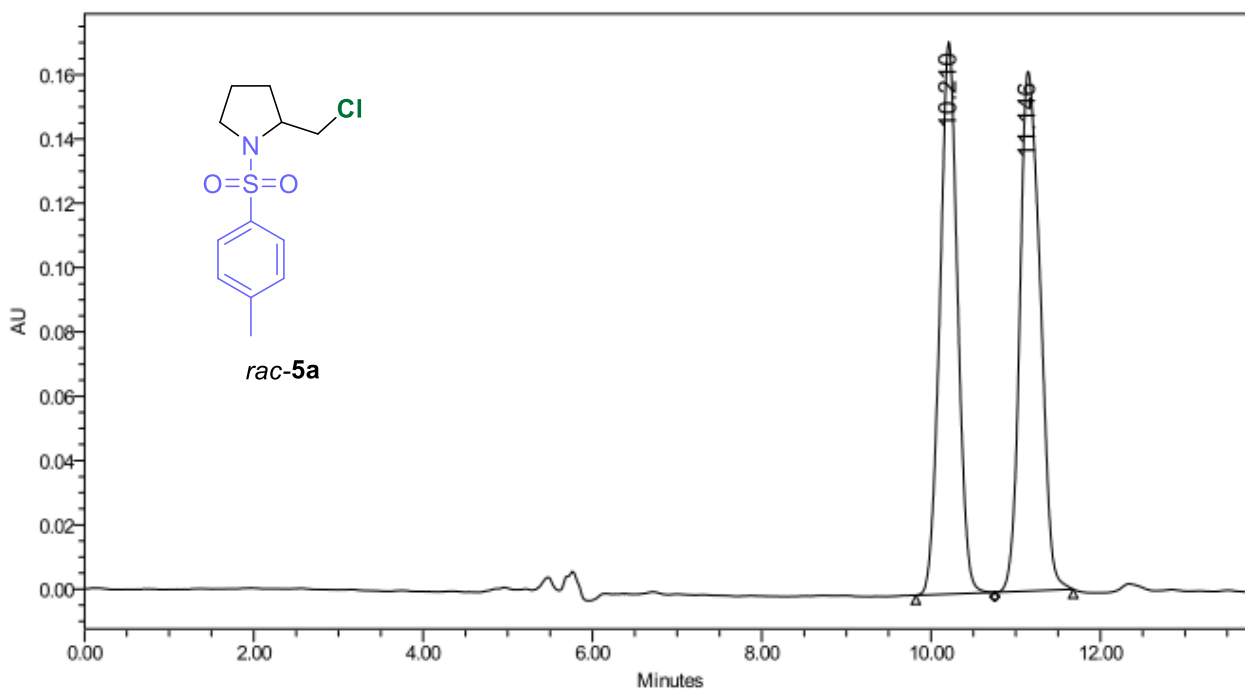

|   | RT (min) | Peak Type | Area ( $\mu\text{V}\cdot\text{sec}$ ) | % Area | Height ( $\mu\text{V}$ ) | % Height | Integration Type | Points Across Peak | Start Time (min) | End Time (min) |
|---|----------|-----------|---------------------------------------|--------|--------------------------|----------|------------------|--------------------|------------------|----------------|
| 1 | 10.210   | Unknown   | 2493592                               | 47.96  | 171759                   | 51.53    | BV               | 560                | 9.820            | 10.753         |
| 2 | 11.146   | Unknown   | 2705395                               | 52.04  | 161566                   | 48.47    | Vb               | 555                | 10.753           | 11.678         |

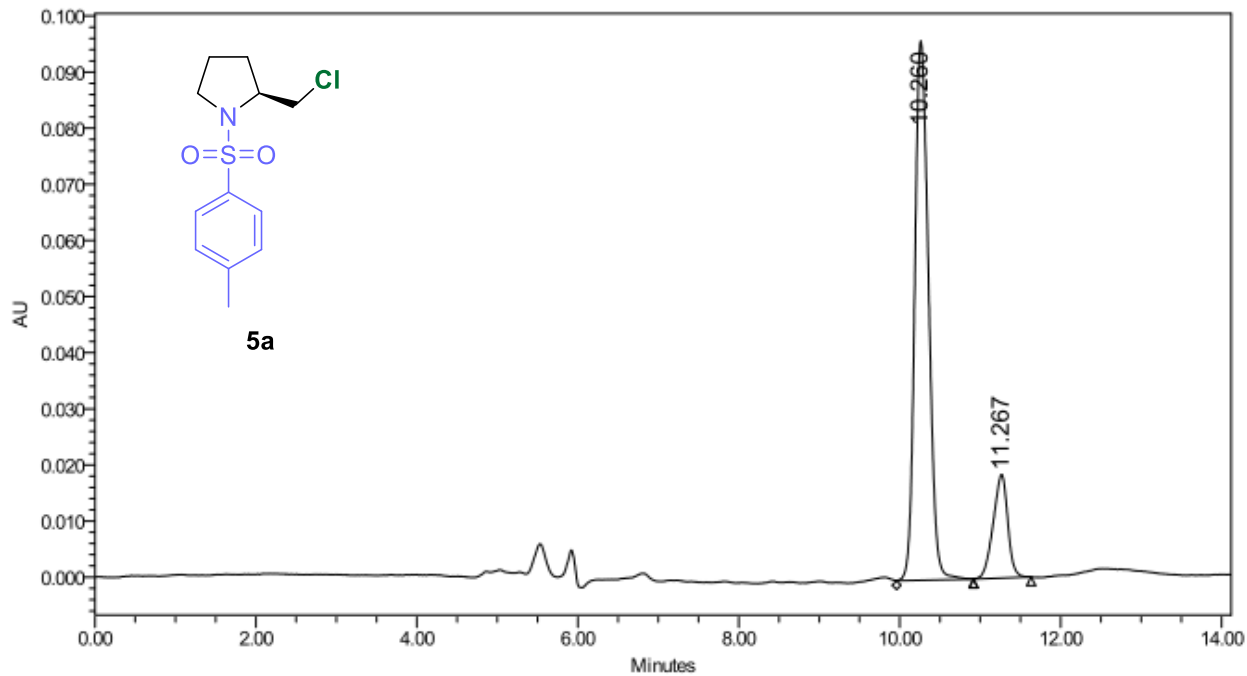

|   | RT (min) | Peak Type | Area ( $\mu\text{V}\cdot\text{sec}$ ) | % Area | Height ( $\mu\text{V}$ ) | % Height | Integration Type | Points Across Peak | Start Time (min) | End Time (min) |
|---|----------|-----------|---------------------------------------|--------|--------------------------|----------|------------------|--------------------|------------------|----------------|
| 1 | 10.260   | Unknown   | 1135240                               | 82.99  | 96112                    | 83.89    | VB               | 574                | 9.960            | 10.917         |
| 2 | 11.267   | Unknown   | 232663                                | 17.01  | 18460                    | 16.11    | BB               | 429                | 10.917           | 11.632         |

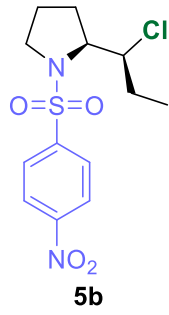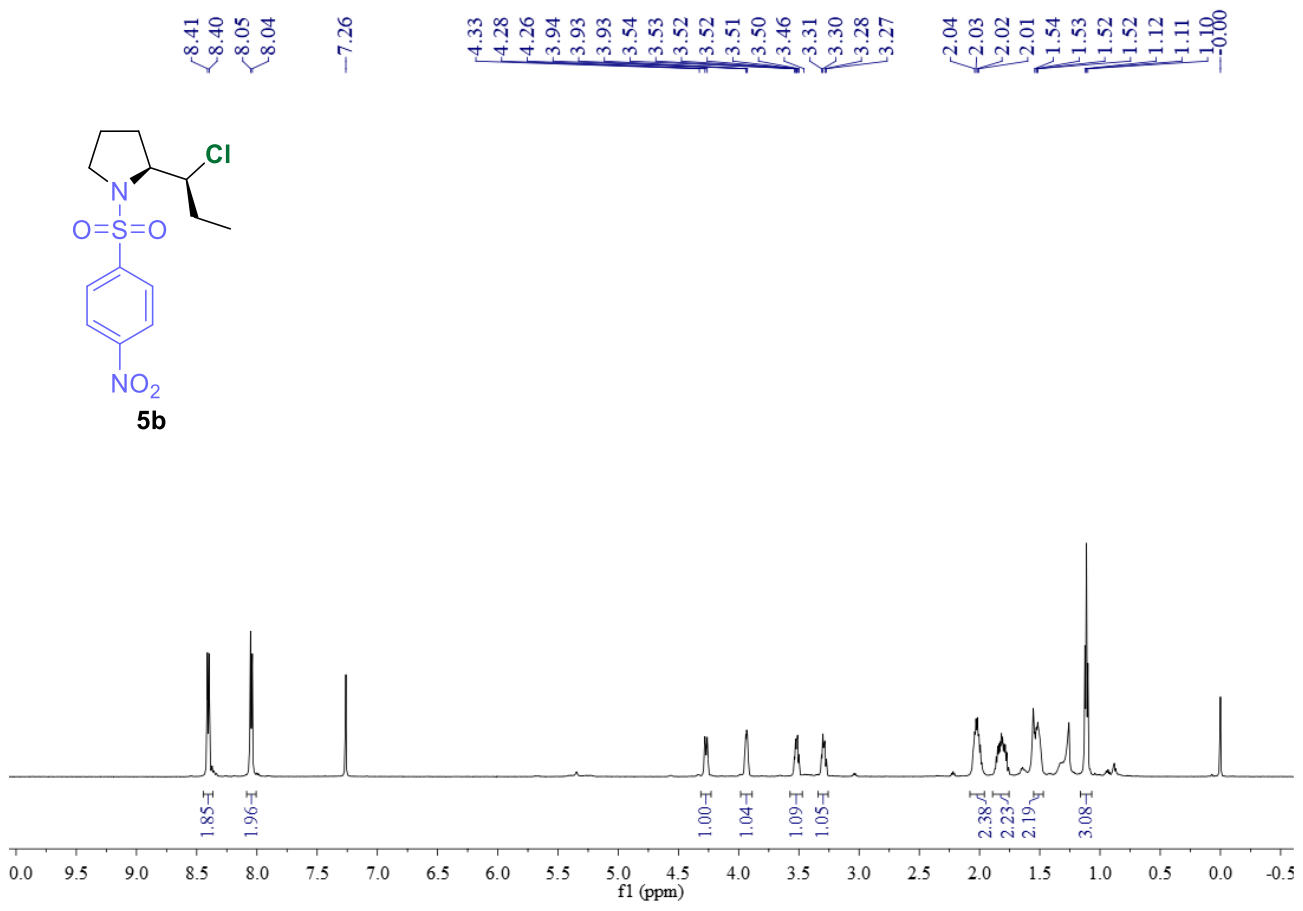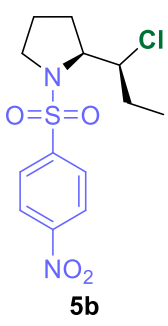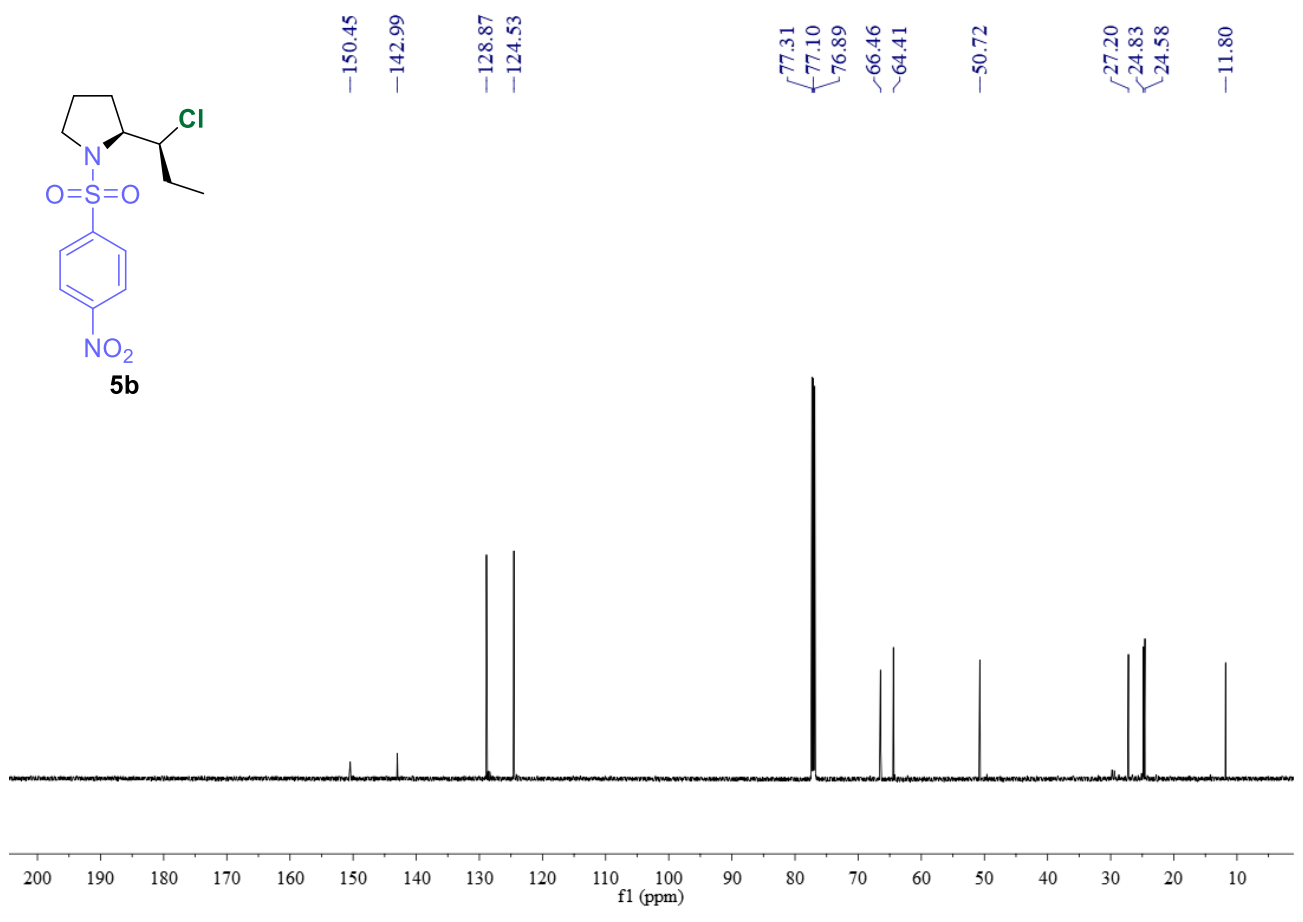

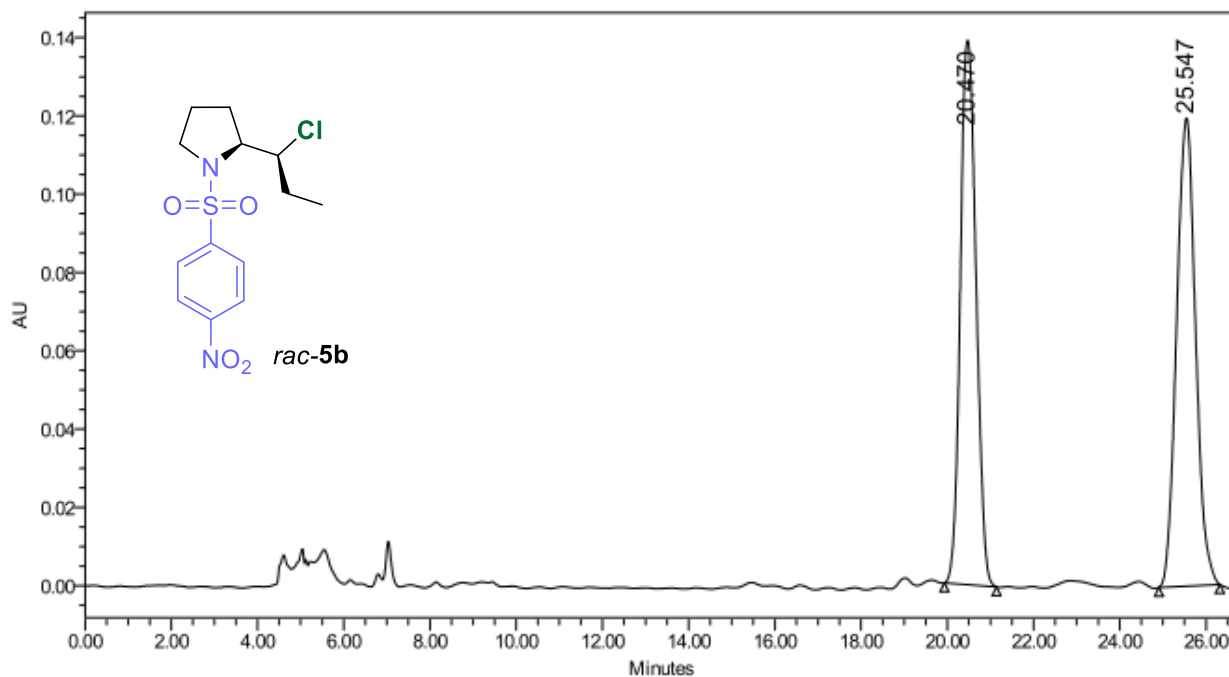

|   | RT (min) | Peak Type | Area ( $\mu\text{V}\cdot\text{sec}$ ) | % Area | Height ( $\mu\text{V}$ ) | % Height | Integration Type | Points Across Peak | Start Time (min) | End Time (min) |
|---|----------|-----------|---------------------------------------|--------|--------------------------|----------|------------------|--------------------|------------------|----------------|
| 1 | 20.470   | Unknown   | 3526494                               | 49.12  | 139042                   | 53.76    | BB               | 726                | 19.932           | 21.142         |
| 2 | 25.547   | Unknown   | 3653283                               | 50.88  | 119598                   | 46.24    | BB               | 850                | 24.905           | 26.322         |

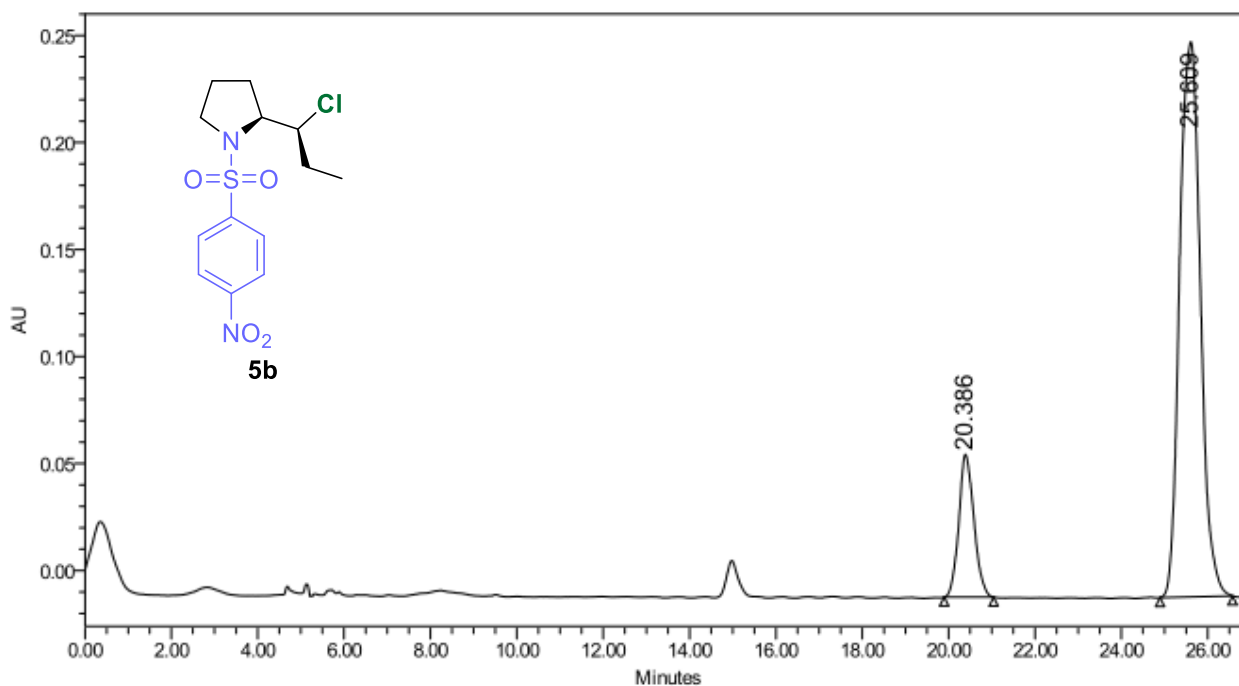

|   | RT (min) | Peak Type | Area ( $\mu\text{V}\cdot\text{sec}$ ) | % Area | Height ( $\mu\text{V}$ ) | % Height | Integration Type | Points Across Peak | Start Time (min) | End Time (min) |
|---|----------|-----------|---------------------------------------|--------|--------------------------|----------|------------------|--------------------|------------------|----------------|
| 1 | 20.386   | Unknown   | 1619863                               | 15.75  | 66620                    | 20.44    | Bb               | 684                | 19.898           | 21.038         |
| 2 | 25.609   | Unknown   | 8668218                               | 84.25  | 259309                   | 79.56    | Bb               | 1009               | 24.893           | 26.575         |

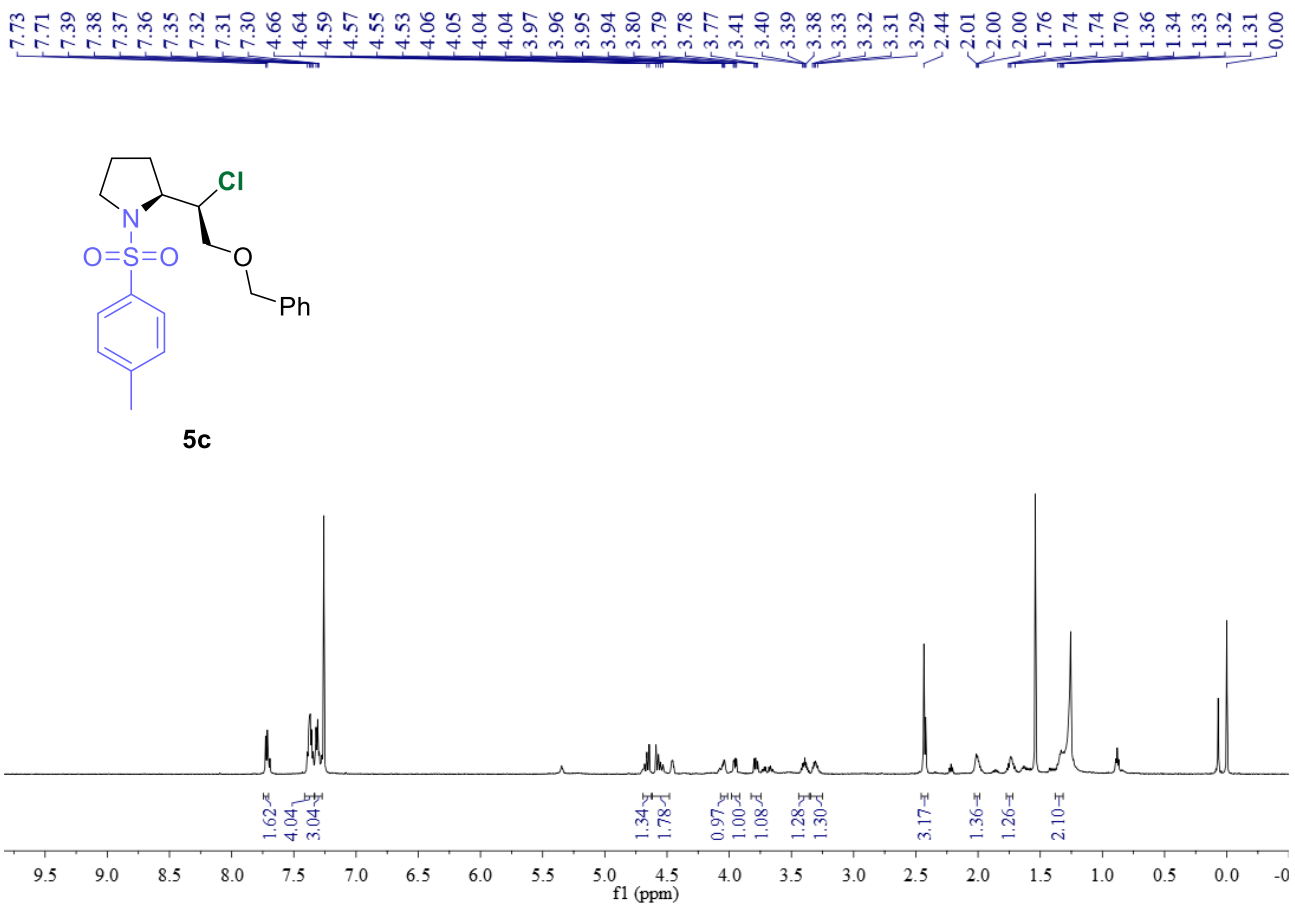

143.86  
138.07  
134.45  
129.90  
128.50  
127.90  
127.78  
127.76

77.31  
77.10  
76.89  
73.39  
70.63  
62.38  
61.98

-50.70

-28.23  
-24.44  
-21.61

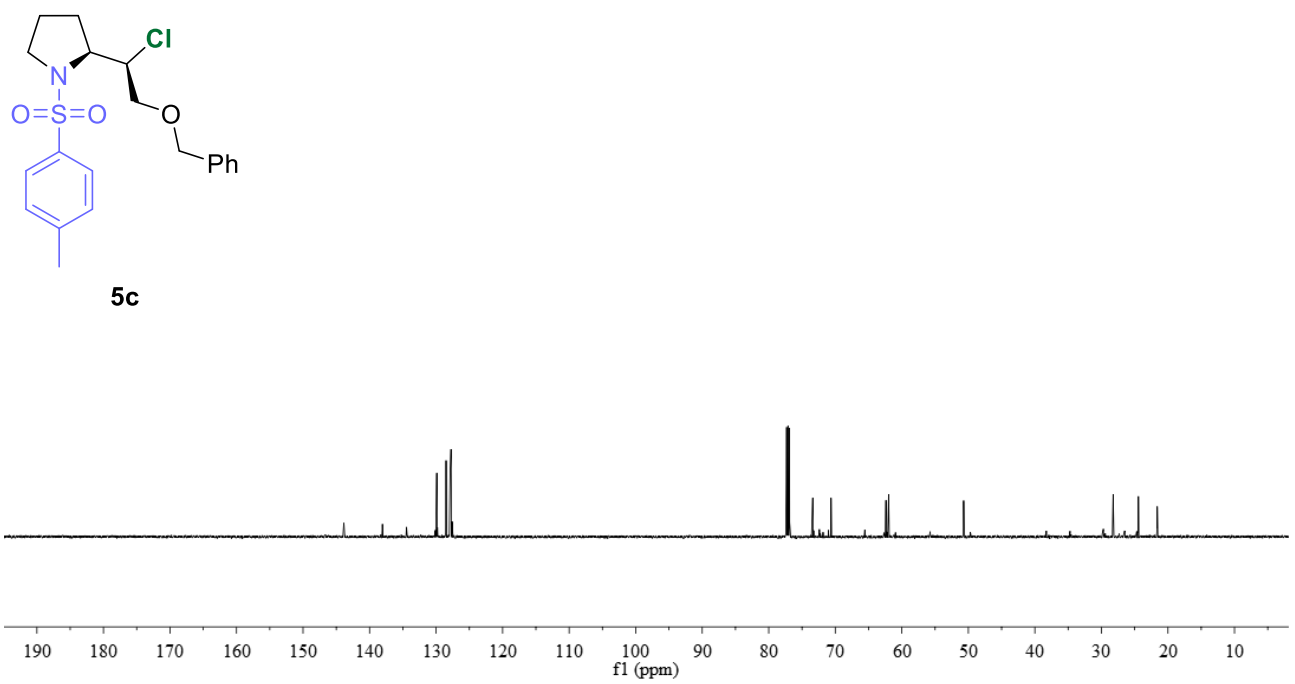



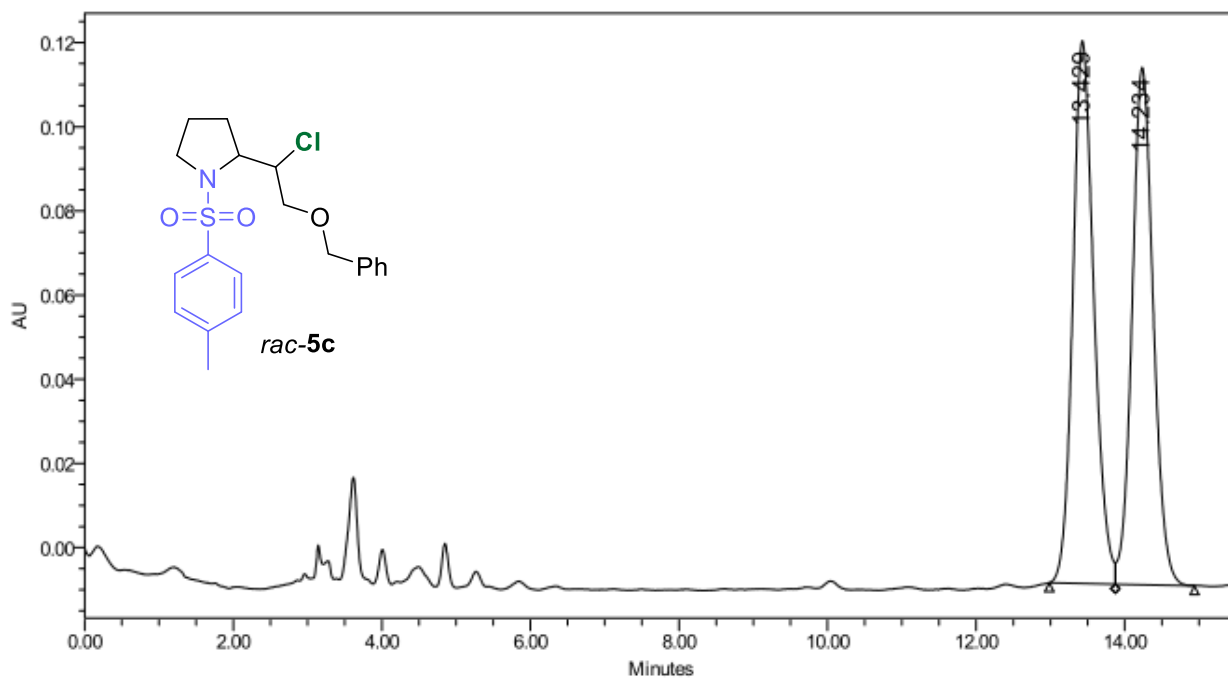

|   | RT (min) | Peak Type | Area ( $\mu\text{V}\cdot\text{sec}$ ) | % Area | Height ( $\mu\text{V}$ ) | % Height | Integration Type | Points Across Peak | Start Time (min) | End Time (min) |
|---|----------|-----------|---------------------------------------|--------|--------------------------|----------|------------------|--------------------|------------------|----------------|
| 1 | 13.429   | Unknown   | 2532340                               | 51.10  | 128946                   | 51.20    | bV               | 533                | 12.985           | 13.873         |
| 2 | 14.234   | Unknown   | 2423180                               | 48.90  | 122885                   | 48.80    | VB               | 638                | 13.873           | 14.937         |

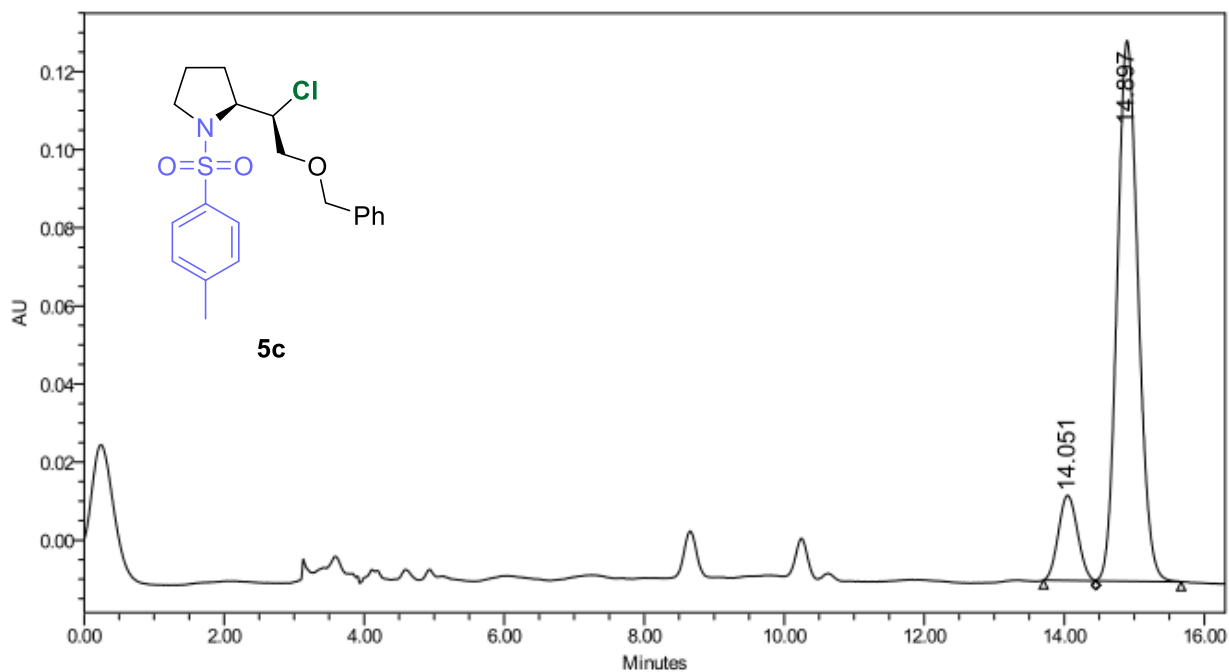

|   | RT (min) | Peak Type | Area ( $\mu\text{V}\cdot\text{sec}$ ) | % Area | Height ( $\mu\text{V}$ ) | % Height | Integration Type | Points Across Peak | Start Time (min) | End Time (min) |
|---|----------|-----------|---------------------------------------|--------|--------------------------|----------|------------------|--------------------|------------------|----------------|
| 1 | 14.051   | Unknown   | 414576                                | 12.59  | 21718                    | 13.56    | bV               | 449                | 13.703           | 14.452         |
| 2 | 14.897   | Unknown   | 2877358                               | 87.41  | 138434                   | 86.44    | Vb               | 731                | 14.452           | 15.670         |

7.74  
7.72  
7.34  
7.33  
4.43  
4.43  
4.42  
4.00  
3.99  
3.99  
3.87  
3.86  
3.85  
3.85  
3.73  
3.72  
3.71  
3.70  
3.54  
3.54  
3.52  
3.51  
3.51  
3.50  
3.48  
3.48  
3.47  
3.46  
3.45  
3.44  
3.31  
3.30  
3.29  
2.44  
2.04  
2.03  
2.02  
1.75  
1.60  
1.59  
1.57  
1.41  
1.40  
1.39  
1.38  
1.36  
0.95  
0.92  
0.00

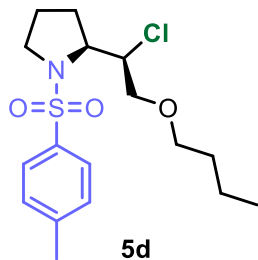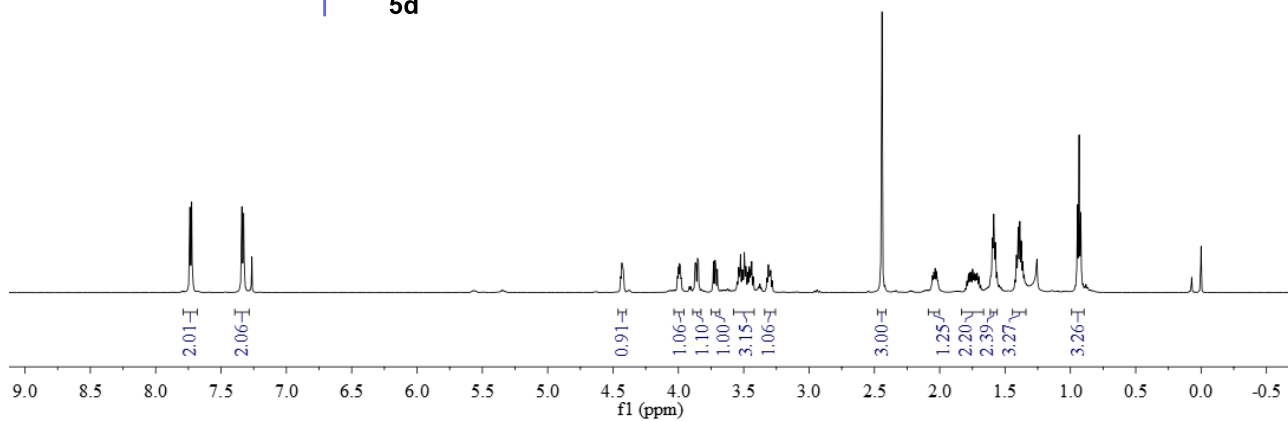

143.86  
134.39  
129.89  
127.75  
71.32  
71.03  
62.41  
62.16  
50.65  
31.86  
28.10  
24.42  
21.61  
19.41  
13.99

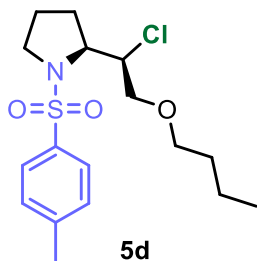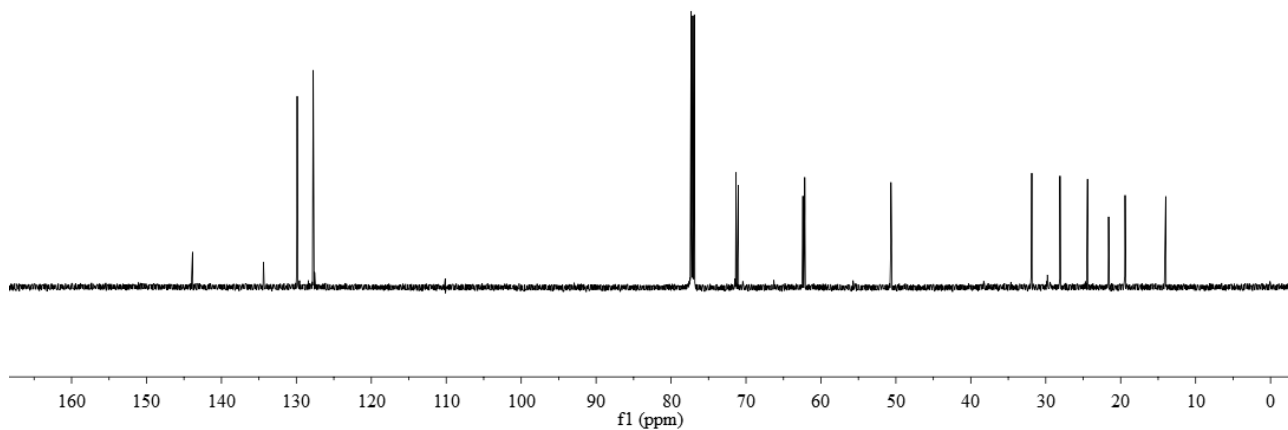

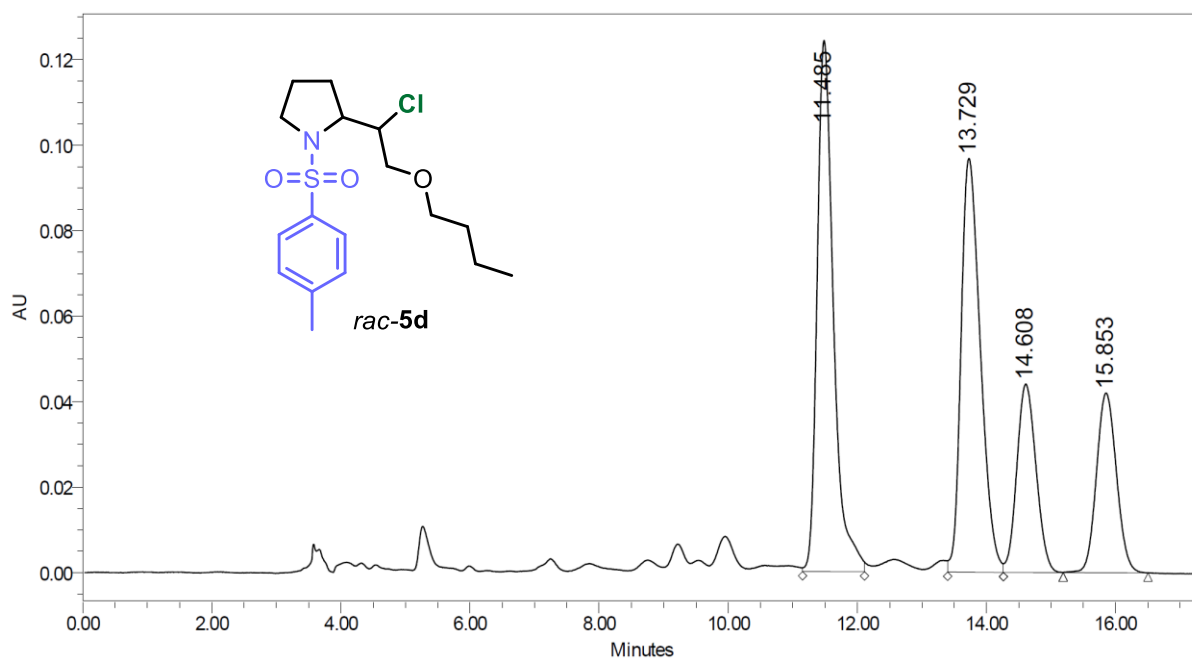

|   | RT (min) | Peak Type | Area ( $\mu\text{V}\cdot\text{sec}$ ) | % Area | Height ( $\mu\text{V}$ ) | % Height | Integration Type | Points Across Peak | Start Time (min) | End Time (min) |
|---|----------|-----------|---------------------------------------|--------|--------------------------|----------|------------------|--------------------|------------------|----------------|
| 1 | 11.485   | Unknown   | 2178687                               | 36.22  | 124250                   | 40.45    | Vv               | 576                | 11.152           | 12.112         |
| 2 | 13.729   | Unknown   | 2014191                               | 33.49  | 96802                    | 31.51    | VV               | 518                | 13.398           | 14.262         |
| 3 | 14.608   | Unknown   | 913987                                | 15.20  | 44085                    | 14.35    | VB               | 557                | 14.262           | 15.190         |
| 4 | 15.853   | Unknown   | 907994                                | 15.10  | 42038                    | 13.69    | BB               | 787                | 15.190           | 16.502         |

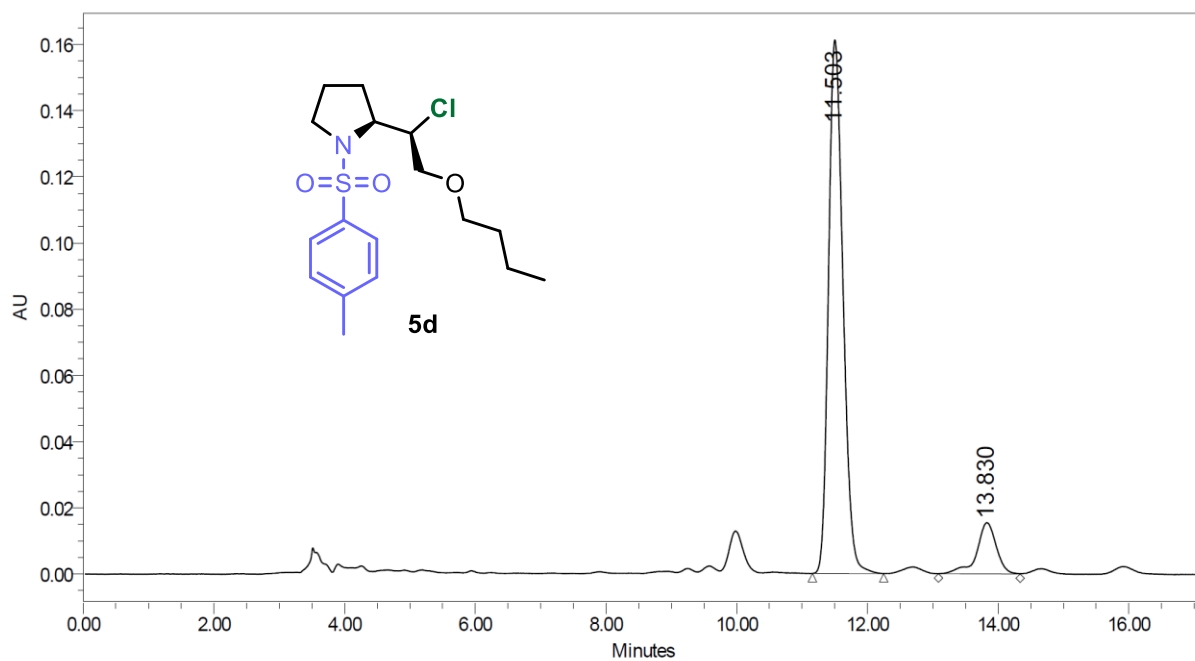

|   | RT (min) | Peak Type | Area ( $\mu\text{V}\cdot\text{sec}$ ) | % Area | Height ( $\mu\text{V}$ ) | % Height | Integration Type | Points Across Peak | Start Time (min) | End Time (min) |
|---|----------|-----------|---------------------------------------|--------|--------------------------|----------|------------------|--------------------|------------------|----------------|
| 1 | 11.503   | Unknown   | 2483743                               | 88.49  | 161210                   | 91.24    | BB               | 654                | 11.158           | 12.248         |
| 2 | 13.830   | Unknown   | 323185                                | 11.51  | 15487                    | 8.76     | VV               | 750                | 13.088           | 14.338         |

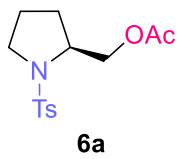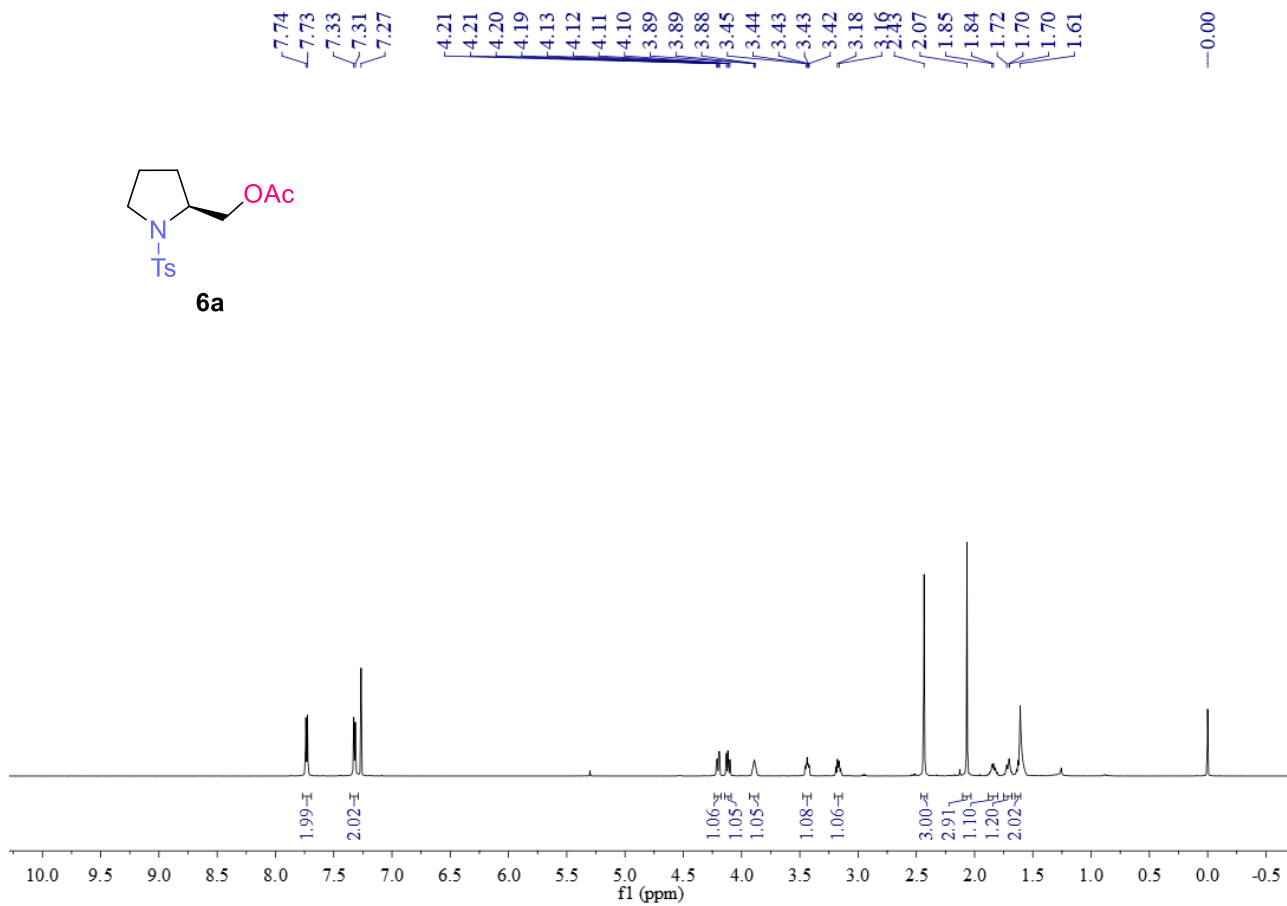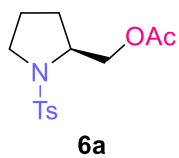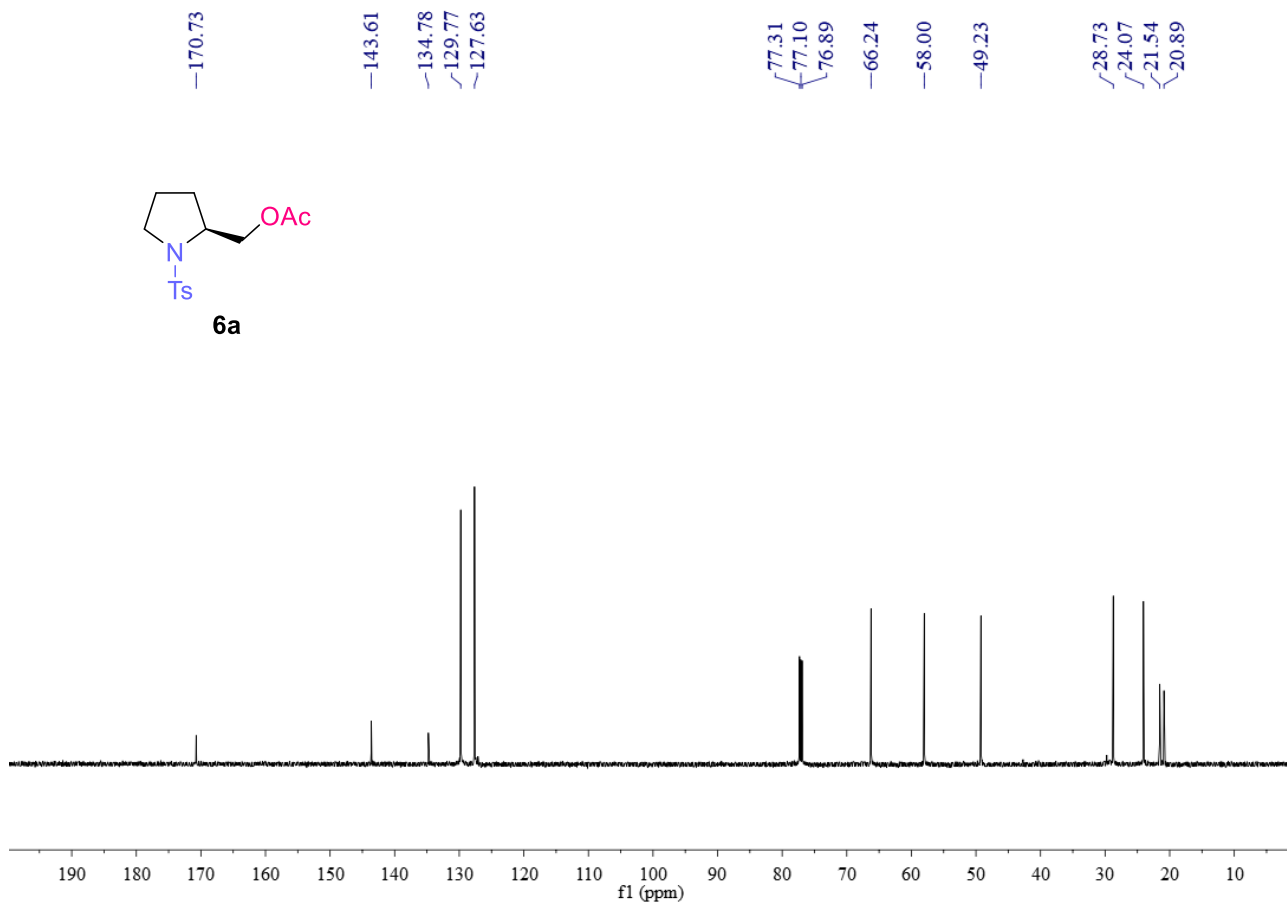

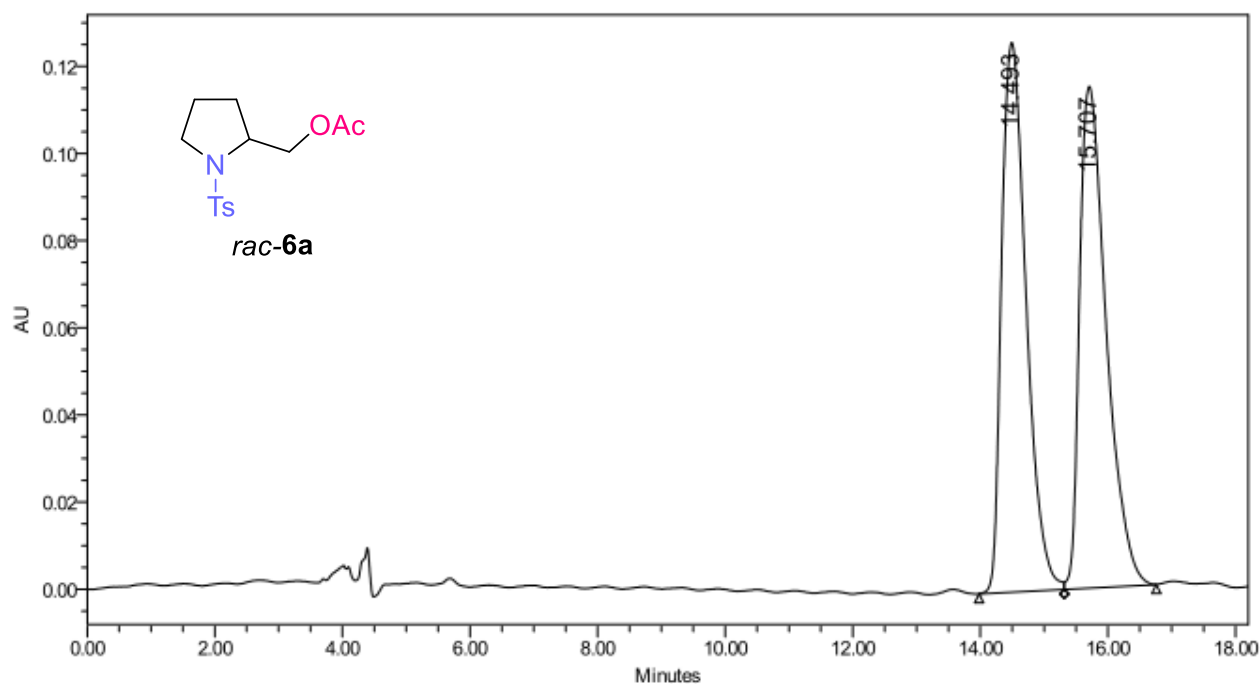

|   | RT (min) | Peak Type | Area ( $\mu\text{V}\cdot\text{sec}$ ) | % Area | Height ( $\mu\text{V}$ ) | % Height | Integration Type | Points Across Peak | Start Time (min) | End Time (min) |
|---|----------|-----------|---------------------------------------|--------|--------------------------|----------|------------------|--------------------|------------------|----------------|
| 1 | 14.493   | Unknown   | 3373248                               | 50.13  | 126143                   | 52.28    | BV               | 801                | 13.980           | 15.315         |
| 2 | 15.707   | Unknown   | 3355126                               | 49.87  | 115135                   | 47.72    | VB               | 865                | 15.315           | 16.757         |

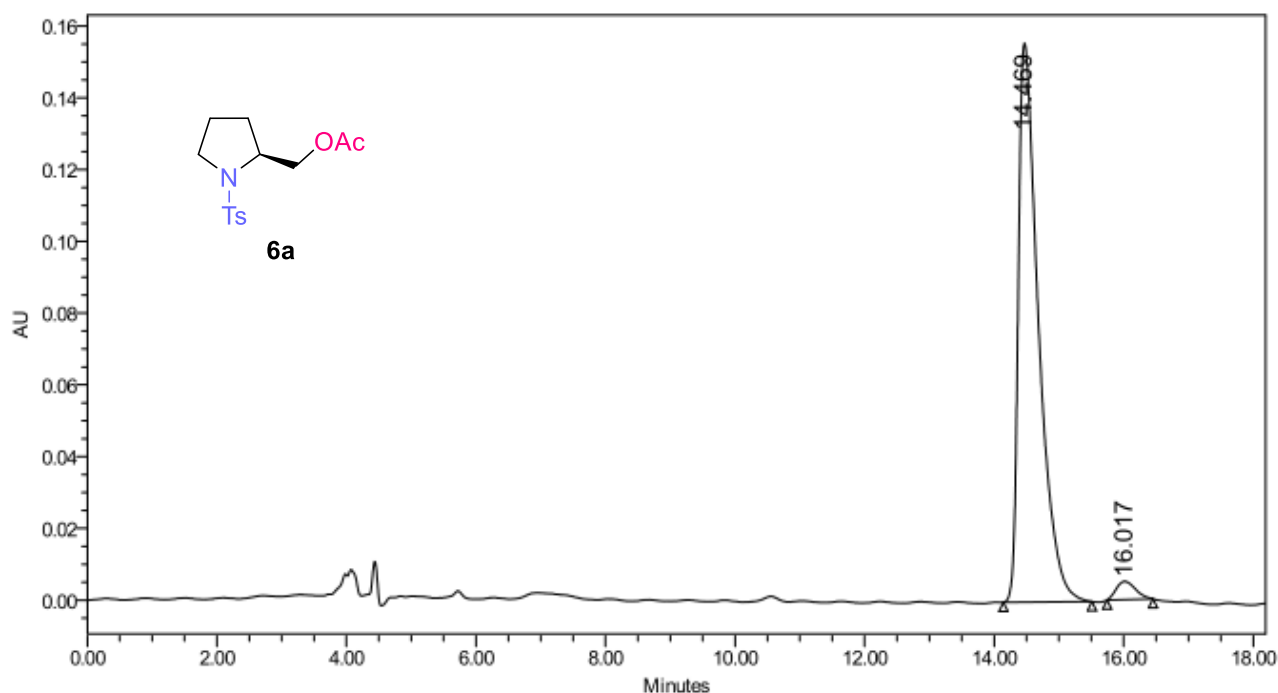

|   | RT (min) | Peak Type | Area ( $\mu\text{V}\cdot\text{sec}$ ) | % Area | Height ( $\mu\text{V}$ ) | % Height | Integration Type | Points Across Peak | Start Time (min) | End Time (min) |
|---|----------|-----------|---------------------------------------|--------|--------------------------|----------|------------------|--------------------|------------------|----------------|
| 1 | 14.469   | Unknown   | 3370963                               | 96.99  | 155784                   | 96.85    | Bb               | 820                | 14.143           | 15.510         |
| 2 | 16.017   | Unknown   | 104446                                | 3.01   | 5059                     | 3.15     | bB               | 425                | 15.743           | 16.452         |

7.74  
7.72  
7.34  
7.33  
3.72  
3.71  
3.71  
3.70  
3.69  
3.58  
3.57  
3.56  
3.55  
3.51  
3.50  
3.49  
3.48  
3.47  
3.46  
3.46  
3.45  
3.45  
3.44  
3.43  
3.18  
3.17  
3.16  
3.15  
3.15  
2.44  
1.87  
1.86  
1.85  
1.84  
1.83  
1.82  
1.81  
1.80  
1.79  
1.79  
1.70  
1.68  
1.68  
1.66  
1.58  
1.57  
1.56  
1.55  
1.55  
0.00

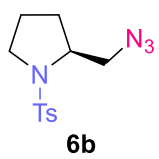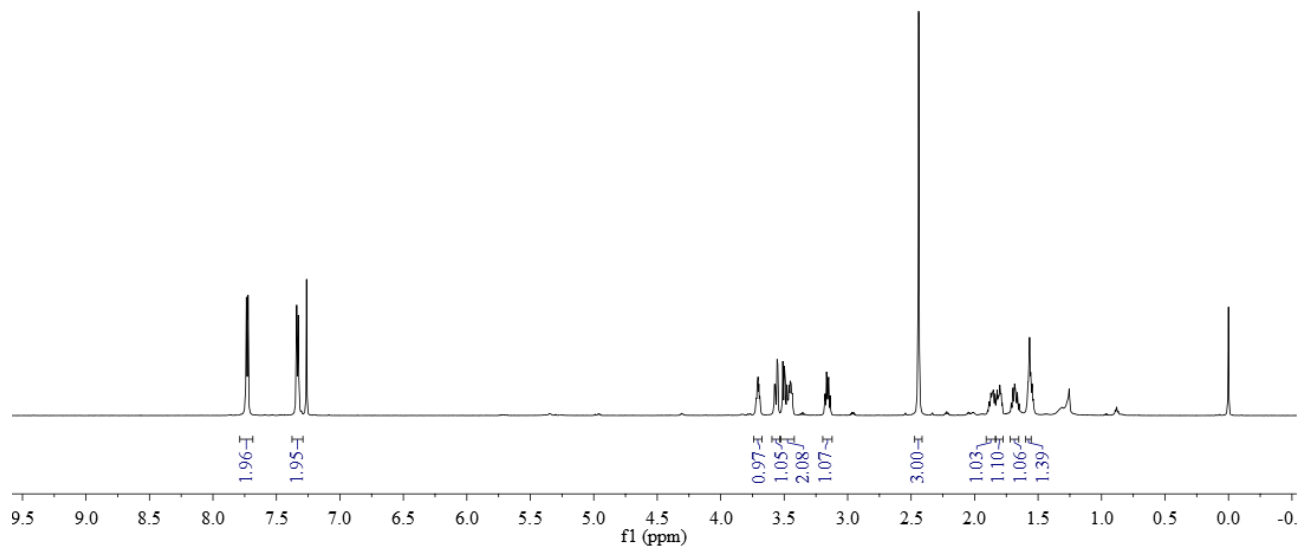

143.82  
 134.40  
 129.87  
 127.69  
 77.31  
 77.10  
 76.89  
 59.00  
 55.38  
 49.55  
 29.46  
 24.17  
 21.60

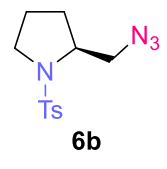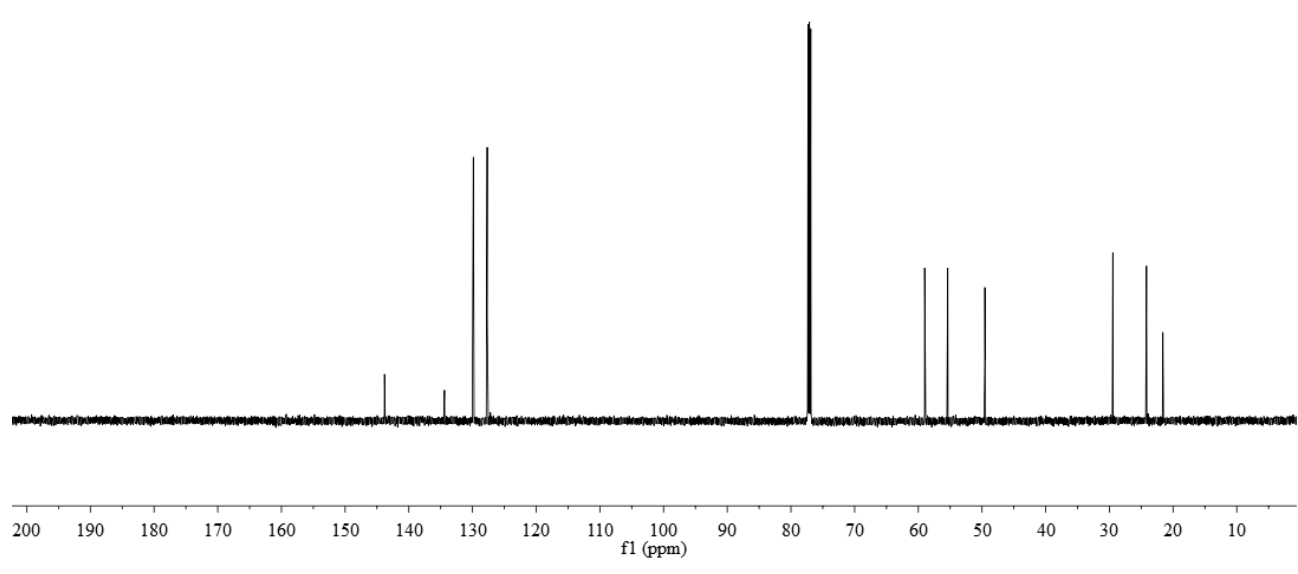

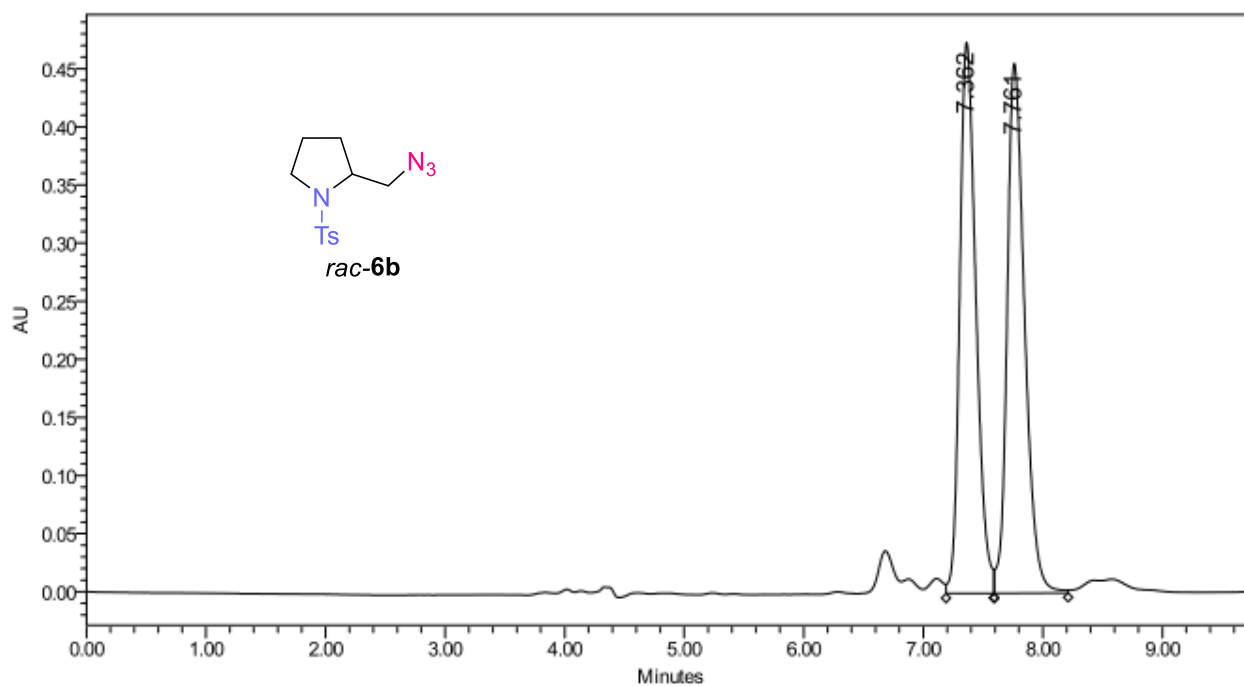

|   | RT (min) | Peak Type | Area ( $\mu\text{V}\cdot\text{sec}$ ) | % Area | Height ( $\mu\text{V}$ ) | % Height | Integration Type | Points Across Peak | Start Time (min) | End Time (min) |
|---|----------|-----------|---------------------------------------|--------|--------------------------|----------|------------------|--------------------|------------------|----------------|
| 1 | 7.362    | Unknown   | 4479883                               | 49.15  | 474195                   | 50.99    | VV               | 242                | 7.190            | 7.593          |
| 2 | 7.761    | Unknown   | 4634425                               | 50.85  | 455713                   | 49.01    | VV               | 371                | 7.593            | 8.212          |

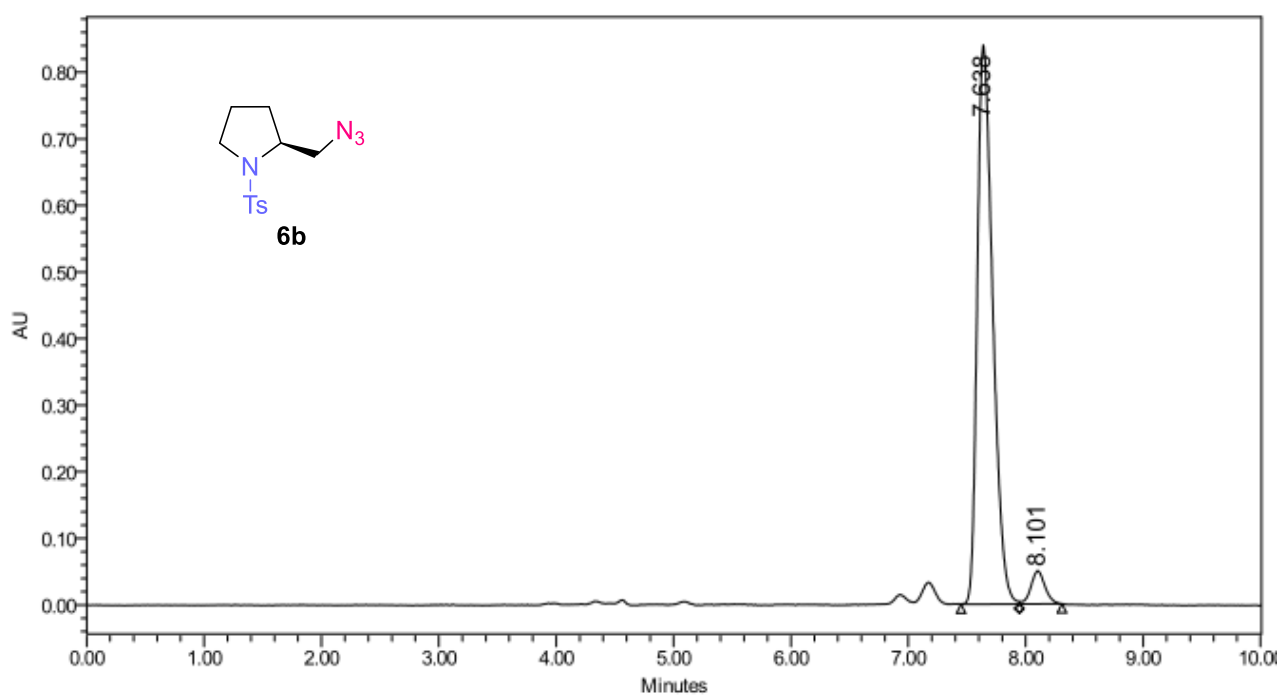

|   | RT (min) | Peak Type | Area ( $\mu\text{V}\cdot\text{sec}$ ) | % Area | Height ( $\mu\text{V}$ ) | % Height | Integration Type | Points Across Peak | Start Time (min) | End Time (min) |
|---|----------|-----------|---------------------------------------|--------|--------------------------|----------|------------------|--------------------|------------------|----------------|
| 1 | 7.638    | Unknown   | 7702935                               | 94.92  | 839549                   | 94.41    | bV               | 299                | 7.448            | 7.947          |
| 2 | 8.101    | Unknown   | 412463                                | 5.08   | 49730                    | 5.59     | Vb               | 217                | 7.947            | 8.308          |

8.02  
7.88  
7.88  
7.86  
7.76  
7.75  
7.45  
7.44  
7.43  
7.37  
7.35  
7.35  
7.35  
4.77  
4.76  
4.75  
4.74  
4.73  
4.73  
4.71  
4.71  
3.91  
3.90  
3.27  
3.26  
3.25  
3.25  
3.24  
3.07  
3.06  
3.04  
3.04  
2.45  
1.98  
1.97  
1.96  
1.95  
1.95  
1.71  
1.69  
1.68  
1.68  
1.67  
1.40  
1.39  
1.39  
1.38  
1.22  
1.21  
1.20  
-0.00

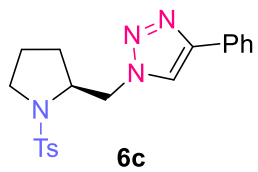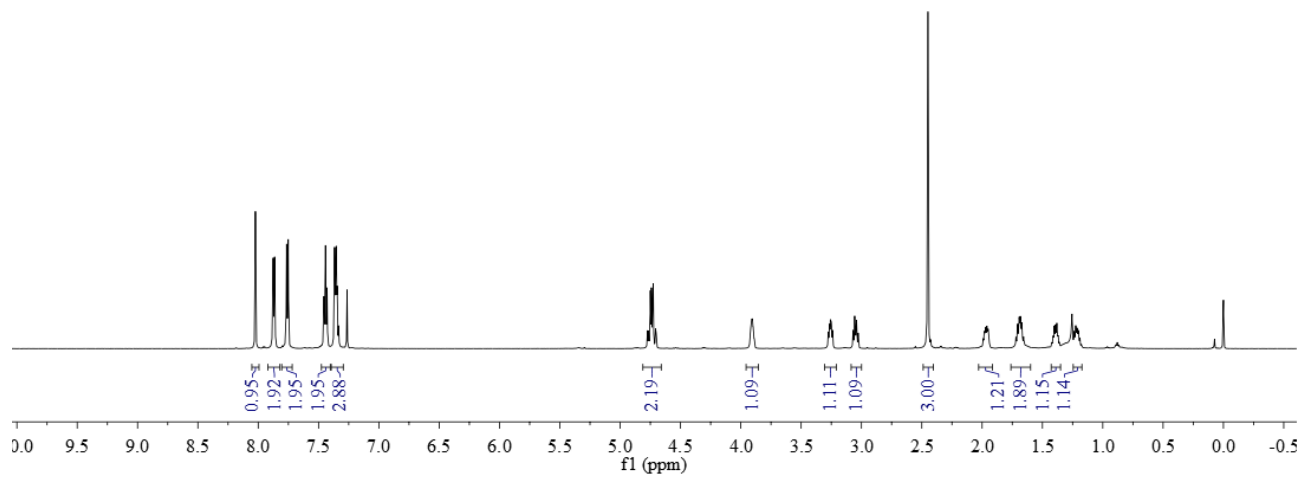

147.94  
144.21  
133.63  
130.04  
128.93  
128.26  
127.70  
125.87  
121.39

77.31  
77.10  
76.89

59.37  
54.35  
49.74

29.16  
23.76  
21.63

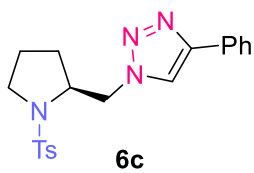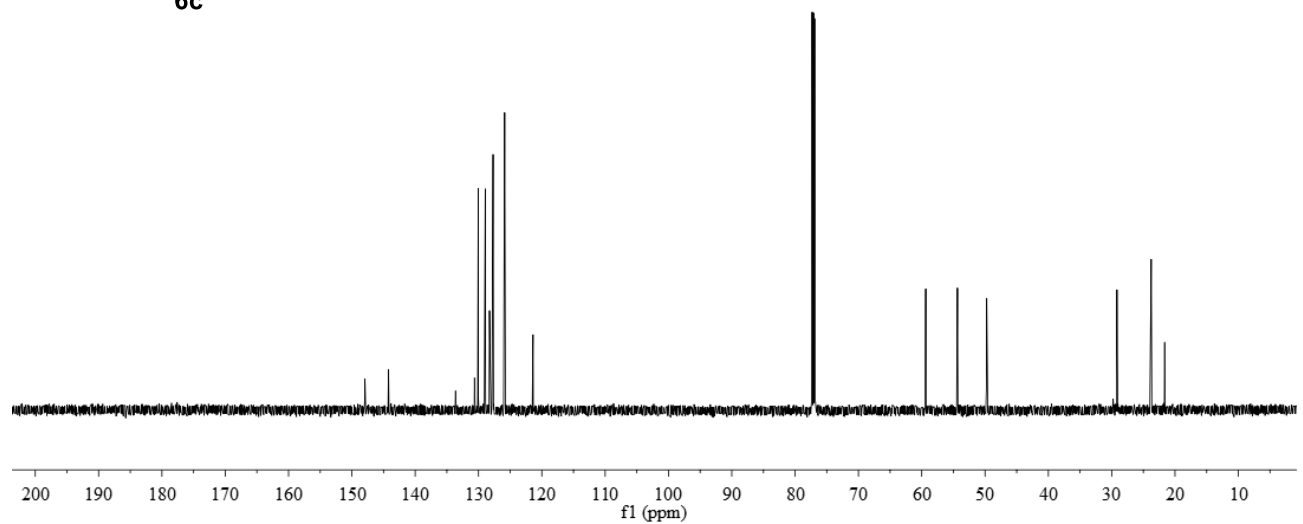



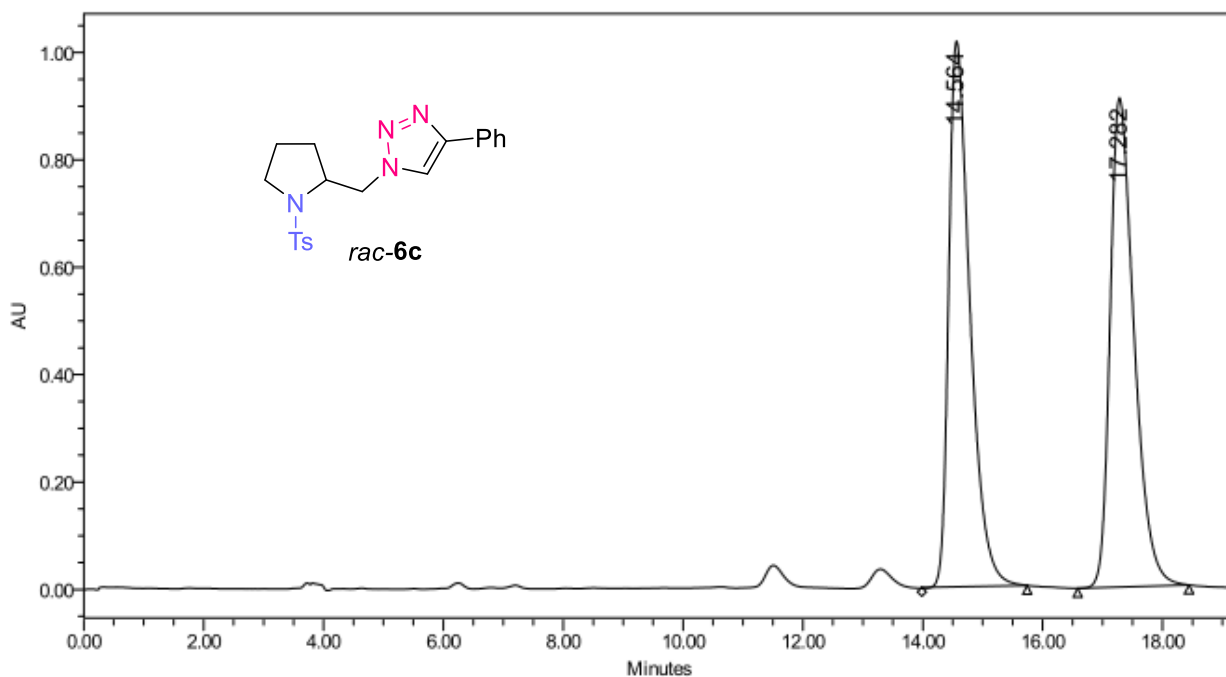

|   | RT (min) | Peak Type | Area ( $\mu\text{V}\cdot\text{sec}$ ) | % Area | Height ( $\mu\text{V}$ ) | % Height | Integration Type | Points Across Peak | Start Time (min) |
|---|----------|-----------|---------------------------------------|--------|--------------------------|----------|------------------|--------------------|------------------|
| 1 | 14.564   | Unknown   | 25049489                              | 49.78  | 1015752                  | 52.73    | Vb               | 1054               | 13.985           |
| 2 | 17.282   | Unknown   | 25274650                              | 50.22  | 910689                   | 47.27    | Bb               | 1115               | 16.583           |

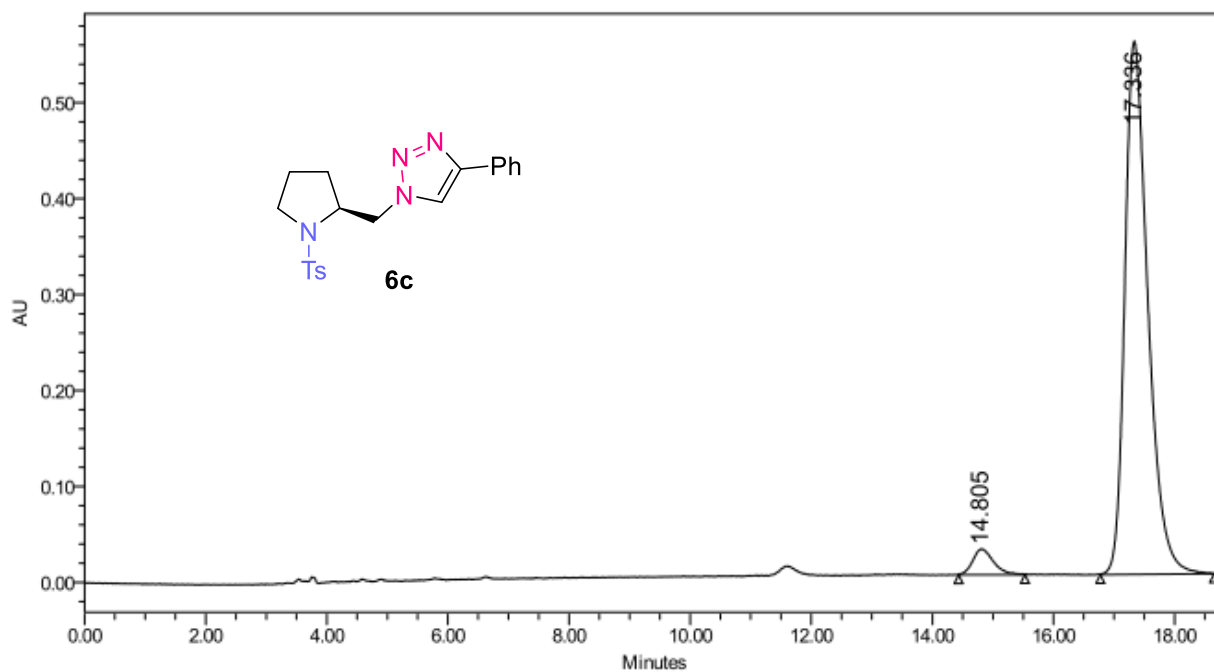

|   | RT (min) | Peak Type | Area ( $\mu\text{V}\cdot\text{sec}$ ) | % Area | Height ( $\mu\text{V}$ ) | % Height | Integration Type | Points Across Peak | Start Time (min) | End Time (min) |
|---|----------|-----------|---------------------------------------|--------|--------------------------|----------|------------------|--------------------|------------------|----------------|
| 1 | 14.805   | Unknown   | 632673                                | 4.13   | 26852                    | 4.61     | BB               | 658                | 14.432           | 15.528         |
| 2 | 17.336   | Unknown   | 14669961                              | 95.87  | 555724                   | 95.39    | BB               | 1128               | 16.773           | 18.653         |
